# Supplementary material
Source: publisher site journal article supplement (https://www.spandidos-publications.com/839/downloadSupplementary)
Supplement: Supplementary file 1 [file downloadSupplementary]

## Sheet: down Hx DLD GOs
Table SIII. Enriched GO categories.
Category	Term	Count	%	PValue	Genes	List Total	Pop Hits	Pop Total	Fold Enrichment	Bonferroni	Benjamini	FDR
GOTERM_BP_FAT	GO:0006414~translational elongation	22	0.635104	1.68322e-18	RPL18, RPL6P27, RPL35, RPLP2, RPS9, RPL36, EEF2, RPS2, RPL29, RPS28, RPS16, RPL18A, RPL13A, RPL8, UBC, RPL3, FAU, EEF1G, RPS13, RPL10, UBB, RPL12	205	101	13528	14.3741	2.32284e-15	2.32284e-15	2.76851e-15
GOTERM_BP_FAT	GO:0006412~translation	28	0.808314	7.56165e-13	RPL18, MRPL41, RPL6P27, RPL35, RPLP2, EIF5A, RPL36, RPS2, RPS28, RPL8, RPL3, MRPL55, FAU, MRPL18, RPL10, EIF1, RPL12, RPS9, EEF2, RPL29, RPS16, RPL18A, RPL13A, UBC, EEF1G, RPS13, DHPS, UBB	205	331	13528	5.58226	1.04352e-09	5.21759e-10	1.24374e-09
GOTERM_BP_FAT	GO:0010035~response to inorganic substance	17	0.490762	8.29089e-08	ACTB, CUTA, BSG, S100A16, PRDX5, DDIT3, MT1X, ACTG1, FOS, CDKN1A, DUSP1, JUN, GPX4, ASNA1, PPP1R15B, PRNP, MB	205	205	13528	5.47236	0.000114408	3.81374e-05	0.000136366
GOTERM_BP_FAT	GO:0042981~regulation of apoptosis	30	0.866051	1.06703e-05	IER3, CBX4, NFKBIA, EIF5A, PRDX5, SFN, FOXO3, HSPA1B, CALR, MIF, BAK1, SQSTM1, BAG3, TPT1, RHOA, ARHGDIA, DEDD2, HERPUD1, CEBPB, LGALS1, PIM3, DAPK3, DDIT3, HSP90B1, CDKN1A, DUSP1, JUN, UBC, UBB, PRNP	205	804	13528	2.46232	0.0146171	0.00367449	0.0175487
GOTERM_BP_FAT	GO:0043067~regulation of programmed cell death	30	0.866051	1.28673e-05	IER3, CBX4, NFKBIA, EIF5A, PRDX5, SFN, FOXO3, HSPA1B, CALR, MIF, BAK1, SQSTM1, BAG3, TPT1, RHOA, ARHGDIA, DEDD2, HERPUD1, CEBPB, LGALS1, PIM3, DAPK3, DDIT3, HSP90B1, CDKN1A, DUSP1, JUN, UBC, UBB, PRNP	205	812	13528	2.43806	0.0176003	0.00354511	0.0211618
GOTERM_BP_FAT	GO:0006915~apoptosis	25	0.721709	1.31538e-05	IER3, MRPL41, SLC25A6, LGALS1, NFKBIA, SFN, FOXO3, DAPK3, DNASE2, BAK1, SQSTM1, JUN, CSRNP1, BAG3, KRT8, UBC, MFSD10, RHOB, CDK11B, UBB, GADD45B, PPP1R15A, PHLDA2, DEDD2, CIB1	205	602	13528	2.74046	0.0179887	0.00302083	0.0216329
GOTERM_BP_FAT	GO:0010941~regulation of cell death	30	0.866051	1.37927e-05	IER3, CBX4, NFKBIA, EIF5A, PRDX5, SFN, FOXO3, HSPA1B, CALR, MIF, BAK1, SQSTM1, BAG3, TPT1, RHOA, ARHGDIA, DEDD2, HERPUD1, CEBPB, LGALS1, PIM3, DAPK3, DDIT3, HSP90B1, CDKN1A, DUSP1, JUN, UBC, UBB, PRNP	205	815	13528	2.42909	0.0188541	0.00271546	0.0226835
GOTERM_BP_FAT	GO:0012501~programmed cell death	25	0.721709	1.6794e-05	IER3, MRPL41, SLC25A6, LGALS1, NFKBIA, SFN, FOXO3, DAPK3, DNASE2, BAK1, SQSTM1, JUN, CSRNP1, BAG3, KRT8, UBC, MFSD10, RHOB, CDK11B, UBB, GADD45B, PPP1R15A, PHLDA2, DEDD2, CIB1	205	611	13528	2.70009	0.0229095	0.0028928	0.0276188
GOTERM_BP_FAT	GO:0043066~negative regulation of apoptosis	18	0.51963	2.61177e-05	IER3, CEBPB, CBX4, NFKBIA, PRDX5, PIM3, HSPA1B, MIF, CDKN1A, HSP90B1, SQSTM1, BAG3, UBC, RHOA, TPT1, UBB, PRNP, ARHGDIA	205	354	13528	3.35544	0.0354011	0.00399676	0.0429491
GOTERM_BP_FAT	GO:0008219~cell death	27	0.779446	3.05873e-05	IER3, MICA, MRPL41, NFKBIA, SFN, FOXO3, BAK1, SQSTM1, BAG3, KRT8, RHOB, PHLDA2, DEDD2, CIB1, SLC25A6, LGALS1, DAPK3, DNASE2, CSRNP1, JUN, UBC, CTSD, MFSD10, CDK11B, UBB, GADD45B, PPP1R15A	205	719	13528	2.47808	0.0413326	0.00421221	0.0502973
GOTERM_BP_FAT	GO:0043069~negative regulation of programmed cell death	18	0.51963	3.12662e-05	IER3, CEBPB, CBX4, NFKBIA, PRDX5, PIM3, HSPA1B, MIF, CDKN1A, HSP90B1, SQSTM1, BAG3, UBC, RHOA, TPT1, UBB, PRNP, ARHGDIA	205	359	13528	3.3087	0.0422305	0.00391487	0.0514135
GOTERM_BP_FAT	GO:0060548~negative regulation of cell death	18	0.51963	3.25886e-05	IER3, CEBPB, CBX4, NFKBIA, PRDX5, PIM3, HSPA1B, MIF, CDKN1A, HSP90B1, SQSTM1, BAG3, UBC, RHOA, TPT1, UBB, PRNP, ARHGDIA	205	360	13528	3.29951	0.0439767	0.00374073	0.0535874
GOTERM_BP_FAT	GO:0016265~death	27	0.779446	3.4399e-05	IER3, MICA, MRPL41, NFKBIA, SFN, FOXO3, BAK1, SQSTM1, BAG3, KRT8, RHOB, PHLDA2, DEDD2, CIB1, SLC25A6, LGALS1, DAPK3, DNASE2, CSRNP1, JUN, UBC, CTSD, MFSD10, CDK11B, UBB, GADD45B, PPP1R15A	205	724	13528	2.46096	0.0463623	0.00364499	0.0565637
GOTERM_BP_FAT	GO:0006916~anti-apoptosis	13	0.375289	6.8867e-05	IER3, CEBPB, CBX4, NFKBIA, HSPA1B, HSP90B1, SQSTM1, BAG3, TPT1, UBC, UBB, PRNP, ARHGDIA	205	206	13528	4.16443	0.0906632	0.00676556	0.113211
GOTERM_BP_FAT	GO:0000302~response to reactive oxygen species	8	0.230947	0.000133353	FOS, DUSP1, GPX4, JUN, PRDX5, PPP1R15B, DDIT3, MB	205	75	13528	7.03896	0.168096	0.0121943	0.219109
GOTERM_BP_FAT	GO:0051789~response to protein stimulus	9	0.259815	0.000211958	EGR1, FOS, HERPUD1, DOM3Z, ID2, DNAJB2, HSPA1B, PPP1R15A, DDIT3	205	107	13528	5.55058	0.25363	0.0181172	0.348054
GOTERM_BP_FAT	GO:0019725~cellular homeostasis	19	0.548499	0.000246857	ALDOA, MAFG, P4HB, HERPUD1, PRDX5, PDIA4, CALR, BUD31, FTH1, DDIT3, BAK1, HSP90B1, JUN, MT2A, TPT1, SH3BGRL3, ASNA1, PRNP, DEDD2	205	466	13528	2.69059	0.288731	0.019842	0.405251
GOTERM_BP_FAT	GO:0006695~cholesterol biosynthetic process	5	0.144342	0.000578627	MVD, DHCR7, HMGCS1, FDPS, FDFT1	205	26	13528	12.6904	0.550103	0.0434041	0.94747
GOTERM_BP_FAT	GO:0033554~cellular response to stress	20	0.577367	0.000935721	SREBF1, HERPUD1, MICA, PRDX5, SFN, FOXO3, XAB2, DDIT3, FOS, CDKN1A, ATF4, CRKL, JUN, GPX4, IRF7, INSIG1, CTSD, PPP1R15B, PPP1R15A, CIB1	205	566	13528	2.33181	0.725251	0.0657346	1.52798
GOTERM_BP_FAT	GO:0042542~response to hydrogen peroxide	6	0.17321	0.00151958	DUSP1, GPX4, JUN, PPP1R15B, DDIT3, MB	205	56	13528	7.07038	0.877374	0.0996131	2.47025
GOTERM_BP_FAT	GO:0034976~response to endoplasmic reticulum stress	5	0.144342	0.00163374	HERPUD1, ATF4, PPP1R15B, PPP1R15A, DDIT3	205	34	13528	9.70445	0.895274	0.101877	2.6535
GOTERM_BP_FAT	GO:0044092~negative regulation of molecular function	14	0.404157	0.00168556	HERPUD1, GNAI3, NFKBIA, SFN, DDIT3, FLNA, PSMA2, CDKN1C, CDKN1A, PSMC4, ID2, UBC, UBB, GADD45B	205	334	13528	2.76606	0.902513	0.100413	2.73657
GOTERM_BP_FAT	GO:0016126~sterol biosynthetic process	5	0.144342	0.00182303	MVD, DHCR7, HMGCS1, FDPS, FDFT1	205	35	13528	9.42718	0.919385	0.103701	2.95662
GOTERM_BP_FAT	GO:0006984~ER-nuclear signaling pathway	5	0.144342	0.00182303	HERPUD1, INSIG1, PPP1R15B, PPP1R15A, DDIT3	205	35	13528	9.42718	0.919385	0.103701	2.95662
GOTERM_BP_FAT	GO:0042592~homeostatic process	23	0.663972	0.00217657	ALDOA, MAFG, P4HB, HERPUD1, PRDX5, FOXO3, PDIA4, CALR, BUD31, FTH1, DDIT3, DNASE2, BAK1, HSP90B1, ID2, JUN, MT2A, TPT1, SH3BGRL3, ASNA1, PRNP, DEDD2, MB	205	751	13528	2.02101	0.950557	0.117758	3.52041
GOTERM_BP_FAT	GO:0046907~intracellular transport	21	0.606236	0.00222465	SCAMP3, SLC25A6, NFKBIA, EIF5A, SDCBP2, CALR, FTH1, FLNA, BAK1, AP1S1, ARF1, SRPR, TOMM5, SQSTM1, JUN, FXC1, RHOB, SLC25A1, YKT6, KDELR1, COPE	205	657	13528	2.10928	0.953738	0.115681	3.59684
GOTERM_BP_FAT	GO:0008203~cholesterol metabolic process	7	0.202079	0.00265761	SREBF1, MVD, DHCR7, INSIG1, HMGCS1, FDPS, FDFT1	205	92	13528	5.021	0.974584	0.131724	4.28258
GOTERM_BP_FAT	GO:0051235~maintenance of location	6	0.17321	0.00275279	HSP90B1, NFKBIA, CALR, KDELR1, FLNA, FTH1	205	64	13528	6.18659	0.977721	0.131417	4.43272
GOTERM_BP_FAT	GO:0008299~isoprenoid biosynthetic process	4	0.115473	0.00318781	MVD, HMGCS1, FDPS, FDFT1	205	20	13528	13.198	0.987799	0.145607	5.1161
GOTERM_BP_FAT	GO:0010038~response to metal ion	8	0.230947	0.00339561	CUTA, ACTG1, ACTB, BSG, S100A16, DUSP1, PRNP, MT1X	205	129	13528	4.09242	0.990849	0.149439	5.44091
GOTERM_BP_FAT	GO:0006979~response to oxidative stress	9	0.259815	0.00342981	FOS, DUSP1, GPX4, JUN, PRDX5, PPP1R15B, PRNP, DDIT3, MB	205	164	13528	3.62142	0.991273	0.146187	5.49427
GOTERM_BP_FAT	GO:0016125~sterol metabolic process	7	0.202079	0.00422602	SREBF1, MVD, DHCR7, INSIG1, HMGCS1, FDPS, FDFT1	205	101	13528	4.57358	0.997104	0.17182	6.72852
GOTERM_BP_FAT	GO:0006986~response to unfolded protein	6	0.17321	0.00431931	HERPUD1, DOM3Z, DNAJB2, HSPA1B, PPP1R15A, DDIT3	205	71	13528	5.57664	0.997455	0.170286	6.87214
GOTERM_BP_FAT	GO:0051238~sequestering of metal ion	3	0.0866051	0.00452101	HSP90B1, CALR, FTH1	205	7	13528	28.2815	0.998076	0.172618	7.18195
GOTERM_BP_FAT	GO:0030003~cellular cation homeostasis	11	0.317552	0.00523042	MAFG, BAK1, HERPUD1, HSP90B1, MT2A, TPT1, ASNA1, CALR, PRNP, BUD31, FTH1	205	254	13528	2.85785	0.99928	0.191723	8.26393
GOTERM_BP_FAT	GO:0006357~regulation of transcription from RNA polymerase II promoter	21	0.606236	0.00686224	SREBF1, EGR1, KLF6, CEBPB, CBX4, NFKBIA, FOXO3, CALR, BUD31, MED10, CDKN1C, HES1, FOS, ATF4, ID2, SQSTM1, JUN, IRF7, CSRNP1, JUND, RHOA	205	727	13528	1.90618	0.999925	0.237765	10.7079
GOTERM_BP_FAT	GO:0043086~negative regulation of catalytic activity	11	0.317552	0.00936898	PSMA2, CDKN1C, HERPUD1, CDKN1A, GNAI3, PSMC4, UBC, UBB, SFN, GADD45B, FLNA	205	277	13528	2.62055	0.999998	0.302907	14.3435
GOTERM_BP_FAT	GO:0010557~positive regulation of macromolecule biosynthetic process	19	0.548499	0.0101033	SREBF1, EGR1, KLF6, CEBPB, NFKBIA, EIF5A, FOXO3, CALR, HMGA1, DDIT3, HES1, FOS, ATF4, SQSTM1, JUN, CSRNP1, GTF2F1, UBC, UBB	205	654	13528	1.91715	0.999999	0.315277	15.3818
GOTERM_BP_FAT	GO:0006595~polyamine metabolic process	3	0.0866051	0.0113798	ODC1, OAZ1, DHPS	205	11	13528	17.9973	1	0.340079	17.1588
GOTERM_BP_FAT	GO:0045941~positive regulation of transcription	17	0.490762	0.0114847	EGR1, SREBF1, KLF6, CEBPB, NFKBIA, FOXO3, HMGA1, DDIT3, HES1, FOS, ATF4, SQSTM1, JUN, CSRNP1, GTF2F1, UBC, UBB	205	564	13528	1.98907	1	0.335508	17.3033
GOTERM_BP_FAT	GO:0055080~cation homeostasis	11	0.317552	0.0115727	MAFG, BAK1, HERPUD1, HSP90B1, MT2A, TPT1, ASNA1, CALR, PRNP, BUD31, FTH1	205	286	13528	2.53809	1	0.330742	17.4243
GOTERM_BP_FAT	GO:0010033~response to organic substance	20	0.577367	0.0127885	EGR1, HERPUD1, BSG, HMGCS1, NFKBIA, HSPA1B, DDIT3, PRSS8, FOS, KRT19, CDKN1A, DOM3Z, DUSP1, GNB2, ID2, JUN, GPX4, DNAJB2, PPP1R15A, MB	205	721	13528	1.83052	1	0.351582	19.0792
GOTERM_BP_FAT	GO:0045935~positive regulation of nucleobase, nucleoside, nucleotide and nucleic acid metabolic process	18	0.51963	0.0134751	SREBF1, EGR1, KLF6, CEBPB, NFKBIA, FOXO3, CALR, HMGA1, DDIT3, HES1, FOS, ATF4, SQSTM1, JUN, CSRNP1, GTF2F1, UBC, UBB	205	624	13528	1.90356	1	0.359664	19.9998
GOTERM_BP_FAT	GO:0043065~positive regulation of apoptosis	14	0.404157	0.0135518	CEBPB, EIF5A, FOXO3, SFN, DAPK3, DDIT3, BAK1, CDKN1A, DUSP1, SQSTM1, JUN, UBC, UBB, DEDD2	205	430	13528	2.14852	1	0.354606	20.1022
GOTERM_BP_FAT	GO:0043068~positive regulation of programmed cell death	14	0.404157	0.014227	CEBPB, EIF5A, FOXO3, SFN, DAPK3, DDIT3, BAK1, CDKN1A, DUSP1, SQSTM1, JUN, UBC, UBB, DEDD2	205	433	13528	2.13363	1	0.361998	20.9968
GOTERM_BP_FAT	GO:0010942~positive regulation of cell death	14	0.404157	0.0147757	CEBPB, EIF5A, FOXO3, SFN, DAPK3, DDIT3, BAK1, CDKN1A, DUSP1, SQSTM1, JUN, UBC, UBB, DEDD2	205	435	13528	2.12382	1	0.366504	21.717
GOTERM_BP_FAT	GO:0010628~positive regulation of gene expression	17	0.490762	0.0148684	EGR1, SREBF1, KLF6, CEBPB, NFKBIA, FOXO3, HMGA1, DDIT3, HES1, FOS, ATF4, SQSTM1, JUN, CSRNP1, GTF2F1, UBC, UBB	205	581	13528	1.93087	1	0.361991	21.8382
GOTERM_BP_FAT	GO:0045454~cell redox homeostasis	5	0.144342	0.0149665	P4HB, PRDX5, PDIA4, SH3BGRL3, DDIT3	205	63	13528	5.23732	1	0.35774	21.966
GOTERM_BP_FAT	GO:0031328~positive regulation of cellular biosynthetic process	19	0.548499	0.0156192	SREBF1, EGR1, KLF6, CEBPB, NFKBIA, EIF5A, FOXO3, CALR, HMGA1, DDIT3, HES1, FOS, ATF4, SQSTM1, JUN, CSRNP1, GTF2F1, UBC, UBB	205	685	13528	1.83039	1	0.364026	22.8122
GOTERM_BP_FAT	GO:0048167~regulation of synaptic plasticity	5	0.144342	0.0157807	EGR1, S100P, UBC, UBB, BHLHE40	205	64	13528	5.15549	1	0.361083	23.0202
GOTERM_BP_FAT	GO:0031668~cellular response to extracellular stimulus	5	0.144342	0.0157807	SREBF1, FOS, CDKN1A, JUN, CTSD	205	64	13528	5.15549	1	0.361083	23.0202
GOTERM_BP_FAT	GO:0009891~positive regulation of biosynthetic process	19	0.548499	0.0178303	SREBF1, EGR1, KLF6, CEBPB, NFKBIA, EIF5A, FOXO3, CALR, HMGA1, DDIT3, HES1, FOS, ATF4, SQSTM1, JUN, CSRNP1, GTF2F1, UBC, UBB	205	695	13528	1.80405	1	0.391377	25.6149
GOTERM_BP_FAT	GO:0051173~positive regulation of nitrogen compound metabolic process	18	0.51963	0.0178319	SREBF1, EGR1, KLF6, CEBPB, NFKBIA, FOXO3, CALR, HMGA1, DDIT3, HES1, FOS, ATF4, SQSTM1, JUN, CSRNP1, GTF2F1, UBC, UBB	205	644	13528	1.84445	1	0.38545	25.6169
GOTERM_BP_FAT	GO:0009991~response to extracellular stimulus	9	0.259815	0.0186621	SREBF1, FOS, CDKN1A, SCAMP3, DOM3Z, DUSP1, JUN, CTSD, DDIT3	205	220	13528	2.6996	1	0.393435	26.6443
GOTERM_BP_FAT	GO:0010604~positive regulation of macromolecule metabolic process	22	0.635104	0.0191243	SREBF1, EGR1, KLF6, CEBPB, AURKAIP1, NFKBIA, EIF5A, FOXO3, CALR, HMGA1, DDIT3, PSMA2, HES1, FOS, ATF4, PSMC4, SQSTM1, JUN, CSRNP1, GTF2F1, UBC, UBB	205	857	13528	1.69403	1	0.395151	27.2105
GOTERM_BP_FAT	GO:0007050~cell cycle arrest	6	0.17321	0.0197807	CDKN1C, CDKN1A, IL8, CALR, PPP1R15A, DDIT3	205	103	13528	3.84409	1	0.399849	28.0076
GOTERM_BP_FAT	GO:0006839~mitochondrial transport	5	0.144342	0.0202673	BAK1, TOMM5, SLC25A6, FXC1, SLC25A1	205	69	13528	4.7819	1	0.401751	28.5931
GOTERM_BP_FAT	GO:0045637~regulation of myeloid cell differentiation	5	0.144342	0.0212493	ZFP36, ID2, JUN, NFKBIA, FOXO3	205	70	13528	4.71359	1	0.410975	29.7612
GOTERM_BP_FAT	GO:0030005~cellular di-, tri-valent inorganic cation homeostasis	9	0.259815	0.0219117	BAK1, HERPUD1, HSP90B1, MT2A, TPT1, CALR, PRNP, BUD31, FTH1	205	227	13528	2.61635	1	0.415145	30.539
GOTERM_BP_FAT	GO:0006917~induction of apoptosis	11	0.317552	0.0234628	BAK1, CDKN1A, CEBPB, SQSTM1, UBC, EIF5A, UBB, SFN, FOXO3, DAPK3, DEDD2	205	320	13528	2.26841	1	0.431587	32.3288
GOTERM_BP_FAT	GO:0051248~negative regulation of protein metabolic process	8	0.230947	0.0234763	PSMA2, BAK1, PSMC4, JUN, UBC, UBB, CALR, FLNA	205	187	13528	2.82311	1	0.426304	32.3442
GOTERM_BP_FAT	GO:0012502~induction of programmed cell death	11	0.317552	0.0238382	BAK1, CDKN1A, CEBPB, SQSTM1, UBC, EIF5A, UBB, SFN, FOXO3, DAPK3, DEDD2	205	321	13528	2.26135	1	0.425882	32.7555
GOTERM_BP_FAT	GO:0045944~positive regulation of transcription from RNA polymerase II promoter	12	0.34642	0.0249107	SREBF1, EGR1, HES1, KLF6, FOS, ATF4, CEBPB, SQSTM1, JUN, CSRNP1, NFKBIA, FOXO3	205	371	13528	2.13446	1	0.434866	33.9604
GOTERM_BP_FAT	GO:0051591~response to cAMP	4	0.115473	0.0252101	FOS, BSG, DUSP1, JUN	205	42	13528	6.28479	1	0.433525	34.2931
GOTERM_BP_FAT	GO:0006873~cellular ion homeostasis	12	0.34642	0.0267307	MAFG, BAK1, HERPUD1, HSP90B1, JUN, MT2A, TPT1, ASNA1, CALR, PRNP, BUD31, FTH1	205	374	13528	2.11733	1	0.447609	35.9588
GOTERM_BP_FAT	GO:0032268~regulation of cellular protein metabolic process	14	0.404157	0.027601	AURKAIP1, MKNK2, EIF5A, NFKBIA, CALR, PSMA2, BAK1, PSMC4, JUN, UBC, EIF1, UBB, PPP1R15B, PPP1R15A	205	474	13528	1.94908	1	0.453113	36.8942
GOTERM_BP_FAT	GO:0006720~isoprenoid metabolic process	4	0.115473	0.0284577	MVD, HMGCS1, FDPS, FDFT1	205	44	13528	5.99911	1	0.458245	37.8024
GOTERM_BP_FAT	GO:0055066~di-, tri-valent inorganic cation homeostasis	9	0.259815	0.0286123	BAK1, HERPUD1, HSP90B1, MT2A, TPT1, CALR, PRNP, BUD31, FTH1	205	239	13528	2.48499	1	0.455007	37.965
GOTERM_BP_FAT	GO:0051726~regulation of cell cycle	11	0.317552	0.0288816	CDKN1C, BAK1, CDKN1A, ID2, AURKAIP1, JUN, RHOB, PIM3, SFN, GADD45B, CALR	205	331	13528	2.19303	1	0.453179	38.2473
GOTERM_BP_FAT	GO:0055082~cellular chemical homeostasis	12	0.34642	0.0293426	MAFG, BAK1, HERPUD1, HSP90B1, JUN, MT2A, TPT1, ASNA1, CALR, PRNP, BUD31, FTH1	205	380	13528	2.0839	1	0.453595	38.7277
GOTERM_BP_FAT	GO:0043433~negative regulation of transcription factor activity	4	0.115473	0.0301608	ID2, NFKBIA, FLNA, DDIT3	205	45	13528	5.8658	1	0.458006	39.5717
GOTERM_BP_FAT	GO:0042326~negative regulation of phosphorylation	4	0.115473	0.0301608	CDKN1C, BAK1, CDKN1A, JUN	205	45	13528	5.8658	1	0.458006	39.5717
GOTERM_BP_FAT	GO:0031400~negative regulation of protein modification process	6	0.17321	0.0341225	PSMA2, BAK1, PSMC4, JUN, UBC, UBB	205	119	13528	3.32724	1	0.49563	43.5061
GOTERM_BP_FAT	GO:0051651~maintenance of location in cell	4	0.115473	0.035585	NFKBIA, KDELR1, FLNA, FTH1	205	48	13528	5.49919	1	0.505525	44.8968
GOTERM_BP_FAT	GO:0010563~negative regulation of phosphorus metabolic process	4	0.115473	0.035585	CDKN1C, BAK1, CDKN1A, JUN	205	48	13528	5.49919	1	0.505525	44.8968
GOTERM_BP_FAT	GO:0045936~negative regulation of phosphate metabolic process	4	0.115473	0.035585	CDKN1C, BAK1, CDKN1A, JUN	205	48	13528	5.49919	1	0.505525	44.8968
GOTERM_BP_FAT	GO:0051385~response to mineralocorticoid stimulus	3	0.0866051	0.035978	PRSS8, FOS, CDKN1A	205	20	13528	9.89854	1	0.504551	45.2649
GOTERM_BP_FAT	GO:0030968~endoplasmic reticulum unfolded protein response	3	0.0866051	0.039378	HERPUD1, PPP1R15A, DDIT3	205	21	13528	9.42718	1	0.532081	48.355
GOTERM_BP_FAT	GO:0034620~cellular response to unfolded protein	3	0.0866051	0.039378	HERPUD1, PPP1R15A, DDIT3	205	21	13528	9.42718	1	0.532081	48.355
GOTERM_BP_FAT	GO:0001836~release of cytochrome c from mitochondria	3	0.0866051	0.039378	BAK1, JUN, SFN	205	21	13528	9.42718	1	0.532081	48.355
GOTERM_BP_FAT	GO:0006694~steroid biosynthetic process	5	0.144342	0.0395065	MVD, DHCR7, HMGCS1, FDPS, FDFT1	205	85	13528	3.88178	1	0.528431	48.4685
GOTERM_BP_FAT	GO:0010608~posttranscriptional regulation of gene expression	8	0.230947	0.0412046	ZFP36, MKNK2, EIF5A, EIF1, CALR, PPP1R15B, PPP1R15A, FLNA	205	211	13528	2.502	1	0.53894	49.9467
GOTERM_BP_FAT	GO:0043392~negative regulation of DNA binding	4	0.115473	0.0414766	ID2, NFKBIA, FLNA, DDIT3	205	51	13528	5.17571	1	0.536612	50.1797
GOTERM_BP_FAT	GO:0045184~establishment of protein localization	19	0.548499	0.0425484	CHMP2A, SCAMP3, PRAF2, NFKBIA, EIF5A, PDIA4, CALR, FLNA, AP1S1, HSP90B1, ARF1, SRPR, TOMM5, JUN, FXC1, RHOB, YKT6, KDELR1, COPE	205	769	13528	1.63045	1	0.541252	51.0882
GOTERM_BP_FAT	GO:0006903~vesicle targeting	3	0.0866051	0.0428946	ARF1, YKT6, COPE	205	22	13528	8.99867	1	0.539601	51.3782
GOTERM_BP_FAT	GO:0008104~protein localization	21	0.606236	0.0442965	CUTA, CHMP2A, SCAMP3, PRAF2, NFKBIA, EIF5A, PDIA4, CALR, FLNA, AP1S1, HSP90B1, ARF1, SRPR, TOMM5, SQSTM1, JUN, FXC1, RHOB, YKT6, KDELR1, COPE	205	882	13528	1.5712	1	0.546812	52.5365
GOTERM_BP_FAT	GO:0051208~sequestering of calcium ion	2	0.0577367	0.044564	HSP90B1, CALR	205	3	13528	43.9935	1	0.544511	52.7544
GOTERM_BP_FAT	GO:0050801~ion homeostasis	12	0.34642	0.0462608	MAFG, BAK1, HERPUD1, HSP90B1, JUN, MT2A, TPT1, ASNA1, CALR, PRNP, BUD31, FTH1	205	409	13528	1.93614	1	0.553788	54.1158
GOTERM_BP_FAT	GO:0048193~Golgi vesicle transport	6	0.17321	0.0482538	SCAMP3, AP1S1, ARF1, YKT6, FTH1, COPE	205	131	13528	3.02245	1	0.564963	55.6676
GOTERM_BP_FAT	GO:0051592~response to calcium ion	4	0.115473	0.0500435	ACTG1, ACTB, S100A16, DUSP1	205	55	13528	4.79929	1	0.574117	57.0191
GOTERM_BP_FAT	GO:0030433~ER-associated protein catabolic process	3	0.0866051	0.0502607	HSP90B1, UBC, UBB	205	24	13528	8.24878	1	0.57138	57.1804
GOTERM_BP_FAT	GO:0050804~regulation of synaptic transmission	6	0.17321	0.0550258	EGR1, GNAI3, S100P, UBC, UBB, BHLHE40	205	136	13528	2.91133	1	0.601034	60.5803
GOTERM_BP_FAT	GO:0030036~actin cytoskeleton organization	8	0.230947	0.0554548	ARPC1A, ACTG1, ALDOA, KRT19, FSCN1, RHOA, CALR, FLNA	205	226	13528	2.33594	1	0.599676	60.8736
GOTERM_BP_FAT	GO:0032269~negative regulation of cellular protein metabolic process	7	0.202079	0.0555856	PSMA2, BAK1, PSMC4, JUN, UBC, UBB, CALR	205	180	13528	2.56629	1	0.596329	60.9627
GOTERM_BP_FAT	GO:0006417~regulation of translation	6	0.17321	0.056443	MKNK2, EIF5A, EIF1, CALR, PPP1R15B, PPP1R15A	205	137	13528	2.89008	1	0.597914	61.5415
GOTERM_BP_FAT	GO:0016197~endosome transport	4	0.115473	0.0569881	SQSTM1, RHOB, YKT6, FLNA	205	58	13528	4.55105	1	0.597401	61.9053
GOTERM_BP_FAT	GO:0006892~post-Golgi vesicle-mediated transport	4	0.115473	0.0569881	SCAMP3, AP1S1, ARF1, FTH1	205	58	13528	4.55105	1	0.597401	61.9053
GOTERM_BP_FAT	GO:0045893~positive regulation of transcription, DNA-dependent	13	0.375289	0.0577232	SREBF1, EGR1, HES1, KLF6, FOS, ATF4, CEBPB, SQSTM1, JUN, CSRNP1, NFKBIA, FOXO3, HMGA1	205	477	13528	1.79848	1	0.598144	62.3908
GOTERM_BP_FAT	GO:0007005~mitochondrion organization	6	0.17321	0.0578811	BAK1, POLRMT, TOMM5, JUN, FXC1, SFN	205	138	13528	2.86914	1	0.595128	62.4943
GOTERM_BP_FAT	GO:0008612~peptidyl-lysine modification to hypusine	2	0.0577367	0.058975	EIF5A, DHPS	205	4	13528	32.9951	1	0.598193	63.2042
GOTERM_BP_FAT	GO:0046516~hypusine metabolic process	2	0.0577367	0.058975	EIF5A, DHPS	205	4	13528	32.9951	1	0.598193	63.2042
GOTERM_BP_FAT	GO:0051100~negative regulation of binding	4	0.115473	0.0593994	ID2, NFKBIA, FLNA, DDIT3	205	59	13528	4.47391	1	0.596941	63.4762
GOTERM_BP_FAT	GO:0051254~positive regulation of RNA metabolic process	13	0.375289	0.060691	SREBF1, EGR1, HES1, KLF6, FOS, ATF4, CEBPB, SQSTM1, JUN, CSRNP1, NFKBIA, FOXO3, HMGA1	205	481	13528	1.78352	1	0.601154	64.2924
GOTERM_BP_FAT	GO:0043161~proteasomal ubiquitin-dependent protein catabolic process	5	0.144342	0.068348	PSMA2, HSP90B1, PSMC4, UBC, UBB	205	102	13528	3.23482	1	0.642423	68.7901
GOTERM_BP_FAT	GO:0010498~proteasomal protein catabolic process	5	0.144342	0.068348	PSMA2, HSP90B1, PSMC4, UBC, UBB	205	102	13528	3.23482	1	0.642423	68.7901
GOTERM_BP_FAT	GO:0015031~protein transport	18	0.51963	0.0686173	CHMP2A, SCAMP3, PRAF2, NFKBIA, EIF5A, PDIA4, CALR, AP1S1, HSP90B1, ARF1, SRPR, TOMM5, JUN, FXC1, RHOB, YKT6, KDELR1, COPE	205	762	13528	1.55882	1	0.640071	68.9381
GOTERM_BP_FAT	GO:0051969~regulation of transmission of nerve impulse	6	0.17321	0.0717627	EGR1, GNAI3, S100P, UBC, UBB, BHLHE40	205	147	13528	2.69348	1	0.65335	70.6192
GOTERM_BP_FAT	GO:0030029~actin filament-based process	8	0.230947	0.0726168	ARPC1A, ACTG1, ALDOA, KRT19, FSCN1, RHOA, CALR, FLNA	205	241	13528	2.19055	1	0.654095	71.0607
GOTERM_BP_FAT	GO:0042062~long-term strengthening of neuromuscular junction	2	0.0577367	0.0731697	UBC, UBB	205	5	13528	26.3961	1	0.653261	71.3432
GOTERM_BP_FAT	GO:0034614~cellular response to reactive oxygen species	3	0.0866051	0.0747357	FOS, GPX4, PRDX5	205	30	13528	6.59902	1	0.657652	72.1293
GOTERM_BP_FAT	GO:0042990~regulation of transcription factor import into nucleus	3	0.0866051	0.0747357	RHOA, NFKBIA, FLNA	205	30	13528	6.59902	1	0.657652	72.1293
GOTERM_BP_FAT	GO:0051436~negative regulation of ubiquitin-protein ligase activity during mitotic cell cycle	4	0.115473	0.0748424	PSMA2, PSMC4, UBC, UBB	205	65	13528	4.06094	1	0.654544	72.1821
GOTERM_BP_FAT	GO:0006401~RNA catabolic process	4	0.115473	0.0748424	ZFP36, RNH1, HSPA1B, DEDD2	205	65	13528	4.06094	1	0.654544	72.1821
GOTERM_BP_FAT	GO:0031145~anaphase-promoting complex-dependent proteasomal ubiquitin-dependent protein catabolic process	4	0.115473	0.0748424	PSMA2, PSMC4, UBC, UBB	205	65	13528	4.06094	1	0.654544	72.1821
GOTERM_BP_FAT	GO:0006875~cellular metal ion homeostasis	7	0.202079	0.0765961	BAK1, HERPUD1, HSP90B1, TPT1, ASNA1, CALR, BUD31	205	196	13528	2.35679	1	0.659772	73.0368
GOTERM_BP_FAT	GO:0031667~response to nutrient levels	7	0.202079	0.0780491	SREBF1, SCAMP3, DOM3Z, DUSP1, JUN, CTSD, DDIT3	205	197	13528	2.34483	1	0.66337	73.7262
GOTERM_BP_FAT	GO:0043122~regulation of I-kappaB kinase/NF-kappaB cascade	5	0.144342	0.0784455	TMED7, SQSTM1, LGALS1, RHOA, FLNA	205	107	13528	3.08366	1	0.661763	73.9114
GOTERM_BP_FAT	GO:0008637~apoptotic mitochondrial changes	3	0.0866051	0.0791221	BAK1, JUN, SFN	205	31	13528	6.38615	1	0.661536	74.2247
GOTERM_BP_FAT	GO:0051444~negative regulation of ubiquitin-protein ligase activity	4	0.115473	0.0803476	PSMA2, PSMC4, UBC, UBB	205	67	13528	3.93972	1	0.663936	74.7831
GOTERM_BP_FAT	GO:0051352~negative regulation of ligase activity	4	0.115473	0.0803476	PSMA2, PSMC4, UBC, UBB	205	67	13528	3.93972	1	0.663936	74.7831
GOTERM_BP_FAT	GO:0044265~cellular macromolecule catabolic process	17	0.490762	0.081667	ZFP36, CBX4, RNH1, HSPA1B, PSMA2, DNASE2, HSP90B1, ISG15, PSMC4, MAP1LC3B, SQSTM1, UBE2M, UBC, TCEB2, UBB, UBXN6, DEDD2	205	725	13528	1.54736	1	0.666722	75.3716
GOTERM_BP_FAT	GO:0031644~regulation of neurological system process	6	0.17321	0.0819463	EGR1, GNAI3, S100P, UBC, UBB, BHLHE40	205	153	13528	2.58785	1	0.66462	75.4945
GOTERM_BP_FAT	GO:0051098~regulation of binding	6	0.17321	0.0819463	BAK1, ID2, NFKBIA, EDF1, FLNA, DDIT3	205	153	13528	2.58785	1	0.66462	75.4945
GOTERM_BP_FAT	GO:0051437~positive regulation of ubiquitin-protein ligase activity during mitotic cell cycle	4	0.115473	0.0831646	PSMA2, PSMC4, UBC, UBB	205	68	13528	3.88178	1	0.66689	76.0239
GOTERM_BP_FAT	GO:0009267~cellular response to starvation	3	0.0866051	0.0835868	SREBF1, JUN, CTSD	205	32	13528	6.18659	1	0.665483	76.2049
GOTERM_BP_FAT	GO:0007568~aging	5	0.144342	0.0848422	FOS, GPX4, JUN, CALR, DDIT3	205	110	13528	2.99956	1	0.667875	76.7354
GOTERM_BP_FAT	GO:0008202~steroid metabolic process	7	0.202079	0.0856257	SREBF1, MVD, DHCR7, INSIG1, HMGCS1, FDPS, FDFT1	205	202	13528	2.28679	1	0.668111	77.0609
GOTERM_BP_FAT	GO:0042127~regulation of cell proliferation	18	0.51963	0.0862508	MAFG, ODC1, IL8, MVD, NFKBIA, EIF5A, RPS9, SFN, CALR, FTH1, CDKN1C, HES1, C19ORF10, CDKN1A, ID2, JUN, DHCR7, DHPS	205	787	13528	1.50931	1	0.667643	77.3174
GOTERM_BP_FAT	GO:0009719~response to endogenous stimulus	11	0.317552	0.0866673	PRSS8, FOS, CDKN1A, KRT19, BSG, DUSP1, GNB2, GPX4, HMGCS1, DDIT3, MB	205	405	13528	1.79233	1	0.666263	77.4869
GOTERM_BP_FAT	GO:0048878~chemical homeostasis	13	0.375289	0.0871499	MAFG, BAK1, HSP90B1, HERPUD1, JUN, MT2A, TPT1, FOXO3, ASNA1, CALR, PRNP, BUD31, FTH1	205	512	13528	1.67553	1	0.665194	77.6818
GOTERM_BP_FAT	GO:0060395~SMAD protein signal transduction	2	0.0577367	0.0871513	FOS, JUN	205	6	13528	21.9967	1	0.662027	77.6823
GOTERM_BP_FAT	GO:0045665~negative regulation of neuron differentiation	3	0.0866051	0.0881266	HES1, RHOA, CALR	205	33	13528	5.99911	1	0.663153	78.0713
GOTERM_BP_FAT	GO:0045639~positive regulation of myeloid cell differentiation	3	0.0866051	0.0881266	ID2, JUN, FOXO3	205	33	13528	5.99911	1	0.663153	78.0713
GOTERM_BP_FAT	GO:0051650~establishment of vesicle localization	3	0.0866051	0.0881266	ARF1, YKT6, COPE	205	33	13528	5.99911	1	0.663153	78.0713
GOTERM_BP_FAT	GO:0010605~negative regulation of macromolecule metabolic process	17	0.490762	0.0887025	EGR1, CBX4, CALR, FLNA, PSMA2, HES1, CDKN1C, BAK1, PSMC4, ID2, JUN, IRF7, UBC, RPS13, UBB, BHLHE40, DEDD2	205	734	13528	1.52838	1	0.662535	78.298
GOTERM_BP_FAT	GO:0051443~positive regulation of ubiquitin-protein ligase activity	4	0.115473	0.0889239	PSMA2, PSMC4, UBC, UBB	205	70	13528	3.77087	1	0.660398	78.3845
GOTERM_BP_FAT	GO:0055065~metal ion homeostasis	7	0.202079	0.090264	BAK1, HERPUD1, HSP90B1, TPT1, ASNA1, CALR, BUD31	205	205	13528	2.25333	1	0.66308	78.9016
GOTERM_BP_FAT	GO:0051439~regulation of ubiquitin-protein ligase activity during mitotic cell cycle	4	0.115473	0.0918649	PSMA2, PSMC4, UBC, UBB	205	71	13528	3.71776	1	0.666798	79.504
GOTERM_BP_FAT	GO:0007015~actin filament organization	4	0.115473	0.094846	ALDOA, FSCN1, RHOA, FLNA	205	72	13528	3.66612	1	0.676058	80.583
GOTERM_BP_FAT	GO:0008284~positive regulation of cell proliferation	11	0.317552	0.0959128	HES1, ODC1, CDKN1A, C19ORF10, ID2, MVD, JUN, EIF5A, RPS9, DHPS, CALR	205	414	13528	1.75336	1	0.677372	80.956
GOTERM_BP_FAT	GO:0051351~positive regulation of ligase activity	4	0.115473	0.0978665	PSMA2, PSMC4, UBC, UBB	205	73	13528	3.6159	1	0.682161	81.6217
GOTERM_BP_FAT	GO:0048534~hemopoietic or lymphoid organ development	8	0.230947	0.0989307	DNASE2, EGR1, KLF6, BAK1, CRKL, ID2, LRRC8A, MB	205	260	13528	2.03047	1	0.683386	81.9751
Nx, normoxia; Hx, hypoxia; up, upregulated genes; down, downregulated genes; GO, Gene Ontology; FAT, DAVID Functional Annotation Clustering Tool.

## Sheet: down Hx LNCaP GOs 
Category	Term	Count	%	PValue	Genes	List Total	Pop Hits	Pop Total	Fold Enrichment	Bonferroni	Benjamini	FDR
GOTERM_BP_FAT	GO:0006414~translational elongation	65	14.4124	2.84425e-74	RPL18, RPL17, RPL19, RPL14, RPL6P27, RPL13, RPS2, RPS3, RPS3A, RPL10, FAU, RPL11, RPL12, RPS27A, RPL35A, RPS18, RPS3AP5, RPL41, RPS16, RPS14, RPS12, EEF1G, RPS13, RPS4Y1, RPS10, RPS11, UBB, TUFM, EEF1B2, RPL27A, RPL35, RPS15A, RPL36, RPL38, RPL39, RPS25, RPL30, RPS27, RPL7, RPL32, RPS29, RPL31, RPL6, RPL9, RPL34, RPL8, RPL3, RPL5, RPL10A, RPL7A, RPL4, RPS20, RPS21, RPS23, RPS24, EEF1A1, RPL27, RP…	391	101	13528	22.2663	5.40976e-71	5.40976e-71	4.86148e-71
GOTERM_BP_FAT	GO:0006412~translation	88	19.5122	4.70363e-60	RPL18, RPL17, MRPL42, RPL19, RPL14, RPL6P27, RPL13, EIF5A, RPL22L1, RPS2, RPS3, RPS3A, RPL10, FAU, MRPL37, EIF1, RPL11, RPL12, MRPL32, RPS27A, RPL36AL, RPL35A, MRPL51, EIF2S3, RSL1D1, RPS18, RPS3AP5, RPS16, RPL41, MRPS18A, RPS14, EIF2S1, RPS12, EEF1G, RPS13, RPS4Y1, RPS10, RPS11, UBB, MRPL45, TUFM, NACA, EEF1B2, RPL27A, RPL35, RPS15A, RPL36, RPL38, RPL39, RPS25, EIF3D, RPS27, RPL30, RPL7, RPL32, …	391	331	13528	9.19838	8.9463e-57	4.47315e-57	8.0396e-57
GOTERM_BP_FAT	GO:0022613~ribonucleoprotein complex biogenesis	27	5.9867	1.09649e-11	RPL14, SNRPD3, SNRPD2, RPL7, PRMT5, NPM1, RPL5, RPL11, RSL24D1, RPL7A, IMP4, RPS24, NSA2, RPL35A, NIP7, RPL24, RPS6, FBL, RPF1, RPS7, RPS16, RPS14, SNRPB, NOP58, NOP56, SNRPC, SNRPE	391	180	13528	5.18977	2.08552e-08	6.95174e-09	1.87416e-08
GOTERM_BP_FAT	GO:0042254~ribosome biogenesis	21	4.65632	2.76583e-10	RPL35A, RPL14, NIP7, RPL24, RPS6, FBL, RPF1, RPS7, RPS16, RPL7, RPS14, NPM1, NOP58, RPL5, RPL11, RSL24D1, RPL7A, NOP56, IMP4, NSA2, RPS24	391	122	13528	5.95547	5.2606e-07	1.31515e-07	4.72744e-07
GOTERM_BP_FAT	GO:0006091~generation of precursor metabolites and energy	31	6.87361	7.9477e-09	NDUFB3, LDHB, NDUFB4, LDHA, TXN2, ATP5B, CYC1, PGAM1, NDUFAB1, COX7C, ATP5G1, UQCRFS1, ATP5G3, NDUFS5, TPI1, ATP5I, ATP5H, GAPDH, FH, ENO1, NDUFA4, NDUFB11, SUCLG1, IDH3B, NDUFA1, UQCRH, TXN, ATP5C1, COX6A1, TXNRD1, PGK1	391	313	13528	3.42669	1.51164e-05	3.0233e-06	1.35845e-05
GOTERM_BP_FAT	GO:0016072~rRNA metabolic process	17	3.7694	1.35135e-08	RPL35A, RPL14, MKI67IP, RPS6, FBL, RPF1, RPS7, RPL7, RPS16, RPS14, NOP58, RPL5, RPL11, NOP56, IMP4, NSA2, RPS24	391	96	13528	6.12681	2.57023e-05	4.28376e-06	2.30976e-05
GOTERM_BP_FAT	GO:0006457~protein folding	22	4.87805	3.94984e-08	HSP90AB1, TCP1, HSP90AA1, FKBP4, CCT2, CCT6A, CCT3, LMAN1, ST13, CCT7, TRAP1, UXT, PFDN2, HSP90B1, CCT4, PPIB, TBCA, PPIA, PFDN4, CCT8, HSPD1, HSPA8	391	177	13528	4.30037	7.51232e-05	1.07322e-05	6.7512e-05
GOTERM_BP_FAT	GO:0006364~rRNA processing	16	3.54767	5.23292e-08	RPL35A, RPL14, RPS6, FBL, RPF1, RPS7, RPL7, RPS16, RPS14, NOP58, RPL5, RPL11, NOP56, IMP4, NSA2, RPS24	391	92	13528	6.01712	9.95251e-05	1.24412e-05	8.94427e-05
GOTERM_BP_FAT	GO:0042273~ribosomal large subunit biogenesis	7	1.55211	1.05227e-07	RPL35A, RPL14, RPL7, NPM1, RPL5, RPL11, RPL24	391	10	13528	24.2189	0.000200121	2.22377e-05	0.000179857
GOTERM_BP_FAT	GO:0006396~RNA processing	40	8.86918	1.68519e-07	RPL14, SNRPD3, SNRPD2, SYNCRIP, PNN, NONO, HNRNPK, RPL7, PCBP1, PRMT5, HNRNPF, RPL5, RPL11, PABPC1, RPL10A, HNRNPC, IMP4, NSA2, RPS24, RPL35A, PPAN-P2RY11, SF3B14, HNRNPA2B1, RPS6, RPF1, FBL, RPS7, SLBP, RSL1D1, RPS16, RPS14, SNRPB, NOP58, SNRPC, NOP56, TRUB1, TRUB2, SNRPE, XRN2, PRPF38A	391	547	13528	2.53005	0.000320471	3.20518e-05	0.000288037
GOTERM_BP_FAT	GO:0031145~anaphase-promoting complex-dependent proteasomal ubiquitin-dependent protein catabolic process	13	2.88248	2.82156e-07	PSMA2, CCNB1, PSMB5, CDK1, MAD2L1, PSMD13, PSMB1, PSMC4, PSMA4, PSMB3, UBB, PSMA7, RPS27A	391	65	13528	6.91969	0.000536516	4.87861e-05	0.000482269
GOTERM_BP_FAT	GO:0051439~regulation of ubiquitin-protein ligase activity during mitotic cell cycle	13	2.88248	7.67317e-07	PSMA2, CCNB1, PSMB5, CDK1, MAD2L1, PSMD13, PSMB1, PSMC4, PSMA4, PSMB3, UBB, PSMA7, RPS27A	391	71	13528	6.33493	0.00145837	0.000121612	0.00131152
GOTERM_BP_FAT	GO:0010498~proteasomal protein catabolic process	15	3.32594	1.28654e-06	CDK1, PSMA7, PSMB5, CCNB1, PSMA2, HSP90B1, SEC61B, MAD2L1, PSMD13, PSMB1, PSMC4, PSMA4, PSMB3, UBB, RPS27A	391	102	13528	5.08801	0.00244401	0.000188213	0.00219897
GOTERM_BP_FAT	GO:0043161~proteasomal ubiquitin-dependent protein catabolic process	15	3.32594	1.28654e-06	CDK1, PSMA7, PSMB5, CCNB1, PSMA2, HSP90B1, SEC61B, MAD2L1, PSMD13, PSMB1, PSMC4, PSMA4, PSMB3, UBB, RPS27A	391	102	13528	5.08801	0.00244401	0.000188213	0.00219897
GOTERM_BP_FAT	GO:0006916~anti-apoptosis	21	4.65632	2.14286e-06	CDK1, HMGB1, CLU, BNIP3, PRDX2, TRIAP1, HSP90B1, HMOX1, TXNDC5, VEGFA, NPM1, TPT1, DAD1, HSPB1, GLO1, CFDP1, UBB, HSPA5, MYC, API5, RPS27A	391	206	13528	3.52703	0.00406744	0.000291081	0.00366259
GOTERM_BP_FAT	GO:0051438~regulation of ubiquitin-protein ligase activity	13	2.88248	2.1702e-06	PSMA2, CCNB1, PSMB5, CDK1, MAD2L1, PSMD13, PSMB1, PSMC4, PSMA4, PSMB3, UBB, PSMA7, RPS27A	391	78	13528	5.76641	0.00411921	0.000275143	0.00370931
GOTERM_BP_FAT	GO:0051340~regulation of ligase activity	13	2.88248	3.26923e-06	PSMA2, CCNB1, PSMB5, CDK1, MAD2L1, PSMD13, PSMB1, PSMC4, PSMA4, PSMB3, UBB, PSMA7, RPS27A	391	81	13528	5.55284	0.00619879	0.000388555	0.00558773
GOTERM_BP_FAT	GO:0051437~positive regulation of ubiquitin-protein ligase activity during mitotic cell cycle	12	2.66075	3.47908e-06	PSMA2, CCNB1, PSMB5, CDK1, PSMD13, PSMB1, PSMC4, PSMA4, PSMB3, UBB, PSMA7, RPS27A	391	68	13528	6.10561	0.00659537	0.000389172	0.00594639
GOTERM_BP_FAT	GO:0032269~negative regulation of cellular protein metabolic process	19	4.21286	4.55595e-06	HSP90AB1, SRP14, PSMA7, YWHAE, PSMB5, PSMA2, EIF4EBP1, PSMD13, SET, MAD2L1, PSMB1, PSMC4, PSMB3, EIF3E, PSMA4, PEBP1, UBB, SRP9, RPS27A	391	180	13528	3.65206	0.00862801	0.000481298	0.0077869
GOTERM_BP_FAT	GO:0051443~positive regulation of ubiquitin-protein ligase activity	12	2.66075	4.66333e-06	PSMA2, CCNB1, PSMB5, CDK1, PSMD13, PSMB1, PSMC4, PSMA4, PSMB3, UBB, PSMA7, RPS27A	391	70	13528	5.93117	0.00883046	0.000466716	0.00797042
GOTERM_BP_FAT	GO:0051351~positive regulation of ligase activity	12	2.66075	7.09738e-06	PSMA2, CCNB1, PSMB5, CDK1, PSMD13, PSMB1, PSMC4, PSMA4, PSMB3, UBB, PSMA7, RPS27A	391	73	13528	5.68742	0.0134086	0.000674736	0.0121304
GOTERM_BP_FAT	GO:0042274~ribosomal small subunit biogenesis	6	1.33038	7.77093e-06	RPS16, RPS14, NPM1, RPS6, RPS7, RPS24	391	11	13528	18.8719	0.0146717	0.000703579	0.0132815
GOTERM_BP_FAT	GO:0051248~negative regulation of protein metabolic process	19	4.21286	7.79041e-06	HSP90AB1, SRP14, PSMA7, YWHAE, PSMB5, PSMA2, EIF4EBP1, PSMD13, SET, MAD2L1, PSMB1, PSMC4, PSMB3, EIF3E, PSMA4, PEBP1, UBB, SRP9, RPS27A	391	187	13528	3.51535	0.0147082	0.000673293	0.0133148
GOTERM_BP_FAT	GO:0043066~negative regulation of apoptosis	27	5.9867	1.24552e-05	XRCC5, HMGB1, CLU, BNIP3, SOX4, PRDX5, PRDX2, TRIAP1, HMOX1, NPM1, TPT1, DAD1, GLO1, HSPA5, MYC, RPS27A, API5, CDK1, HSP90B1, CDKN1A, NME2, TXNDC5, VEGFA, HSPB1, CFDP1, UBB, HSPD1	391	354	13528	2.63887	0.0234115	0.00102947	0.0212867
GOTERM_BP_FAT	GO:0051436~negative regulation of ubiquitin-protein ligase activity during mitotic cell cycle	11	2.43902	1.53672e-05	PSMA2, PSMB5, MAD2L1, PSMD13, PSMB1, PSMC4, PSMA4, PSMB3, UBB, PSMA7, RPS27A	391	65	13528	5.85512	0.0288057	0.00121712	0.0262629
GOTERM_BP_FAT	GO:0043069~negative regulation of programmed cell death	27	5.9867	1.5912e-05	XRCC5, HMGB1, CLU, BNIP3, SOX4, PRDX5, PRDX2, TRIAP1, HMOX1, NPM1, TPT1, DAD1, GLO1, HSPA5, MYC, RPS27A, API5, CDK1, HSP90B1, CDKN1A, NME2, TXNDC5, VEGFA, HSPB1, CFDP1, UBB, HSPD1	391	359	13528	2.60211	0.0298114	0.00120986	0.0271938
GOTERM_BP_FAT	GO:0060548~negative regulation of cell death	27	5.9867	1.67848e-05	XRCC5, HMGB1, CLU, BNIP3, SOX4, PRDX5, PRDX2, TRIAP1, HMOX1, NPM1, TPT1, DAD1, GLO1, HSPA5, MYC, RPS27A, API5, CDK1, HSP90B1, CDKN1A, NME2, TXNDC5, VEGFA, HSPB1, CFDP1, UBB, HSPD1	391	360	13528	2.59488	0.0314207	0.00122713	0.0286853
GOTERM_BP_FAT	GO:0032268~regulation of cellular protein metabolic process	32	7.09534	1.89175e-05	HSP90AB1, SRP14, EIF5A, PSMA7, PSMB5, EIF4EBP1, SET, PSMB1, PSMB3, EIF3E, EIF1, RPS27A, ADAM9, CDK1, CDK4, RPS5, YWHAE, PSMA2, CCNB1, EIF4B, SARNP, CCND1, PSMD13, MAD2L1, PSMC4, PSMA4, EIF4H, EIF2S1, PEBP1, HSPB1, UBB, SRP9	391	474	13528	2.33576	0.0353418	0.00133176	0.0323295
GOTERM_BP_FAT	GO:0051444~negative regulation of ubiquitin-protein ligase activity	11	2.43902	2.0225e-05	PSMA2, PSMB5, MAD2L1, PSMD13, PSMB1, PSMC4, PSMA4, PSMB3, UBB, PSMA7, RPS27A	391	67	13528	5.68035	0.0377379	0.00137293	0.0345637
GOTERM_BP_FAT	GO:0051352~negative regulation of ligase activity	11	2.43902	2.0225e-05	PSMA2, PSMB5, MAD2L1, PSMD13, PSMB1, PSMC4, PSMA4, PSMB3, UBB, PSMA7, RPS27A	391	67	13528	5.68035	0.0377379	0.00137293	0.0345637
GOTERM_BP_FAT	GO:0006119~oxidative phosphorylation	13	2.88248	2.41664e-05	NDUFB3, NDUFA4, NDUFB4, NDUFS5, UQCRH, ATP5B, ATP5C1, NDUFAB1, ATP5G1, ATP5I, ATP5H, ATP5G3, NDUFA1	391	98	13528	4.58959	0.0449247	0.00158375	0.041298
GOTERM_BP_FAT	GO:0000278~mitotic cell cycle	27	5.9867	2.68016e-05	CETN2, PTTG1, PSMA7, CCNG1, PSMB5, PSMB1, OIP5, PSMB3, RPS27A, CDK1, RAN, RPL24, PBK, CDK4, PSMA2, CCNB1, CDKN1A, CCND1, PSMD13, MAD2L1, PSMC4, PSMA4, RUVBL1, STMN1, UBB, KPNA2, DSCC1	391	370	13528	2.52475	0.0496997	0.0016978	0.0458003
GOTERM_BP_FAT	GO:0031398~positive regulation of protein ubiquitination	12	2.66075	2.78963e-05	PSMA2, CCNB1, PSMB5, CDK1, PSMD13, PSMB1, PSMC4, PSMA4, PSMB3, UBB, PSMA7, RPS27A	391	84	13528	4.94264	0.0516763	0.00171013	0.0476705
GOTERM_BP_FAT	GO:0034470~ncRNA processing	18	3.99113	2.9289e-05	RPL35A, RPL14, RPS6, FBL, RPF1, RPS7, RPL7, RPS16, RPS14, NOP58, RPL5, RPL11, NOP56, TRUB1, IMP4, TRUB2, NSA2, RPS24	391	187	13528	3.33033	0.0541853	0.00173938	0.05005
GOTERM_BP_FAT	GO:0031396~regulation of protein ubiquitination	13	2.88248	2.96729e-05	PSMA2, CCNB1, PSMB5, CDK1, MAD2L1, PSMD13, PSMB1, PSMC4, PSMA4, PSMB3, UBB, PSMA7, RPS27A	391	100	13528	4.4978	0.0548755	0.0017088	0.0507058
GOTERM_BP_FAT	GO:0006413~translational initiation	9	1.99557	3.75862e-05	EIF3D, RPS3AP5, RPS3A, EIF3E, EIF2S3, EIF1, EIF3I, EIF3J, RPS5, RPS3	391	45	13528	6.91969	0.0689946	0.00210045	0.0642241
GOTERM_BP_FAT	GO:0031400~negative regulation of protein modification process	14	3.10421	3.82378e-05	PSMA7, YWHAE, PSMB5, PSMA2, SET, MAD2L1, PSMD13, PSMB1, PSMC4, PSMA4, PSMB3, PEBP1, UBB, RPS27A	391	119	13528	4.07041	0.0701479	0.00207584	0.0653373
GOTERM_BP_FAT	GO:0010608~posttranscriptional regulation of gene expression	19	4.21286	4.03241e-05	SRP14, SYNCRIP, EIF5A, SOX4, CDK4, RPS5, EIF4B, SARNP, EIF4EBP1, EIF2S1, SERBP1, EIF3E, EIF4H, VEGFA, HSPB1, EIF1, HSPD1, PABPC1, SRP9	391	211	13528	3.1155	0.0738305	0.00212823	0.068901
GOTERM_BP_FAT	GO:0022402~cell cycle process	35	7.76053	4.1018e-05	CETN2, PTTG1, PSMA7, CCNG1, UHMK1, SESN3, PSMB5, RPA1, PSMB1, OIP5, PSMB3, NPM1, RANBP1, MYC, RPS27A, CDK1, RAN, RPL24, PBK, CDK4, PSMA2, CCNB1, CCND1, CDKN1A, PSMD13, MAD2L1, PSMC4, PSMA4, CKS2, RUVBL1, STMN1, UBB, KPNA2, DSCC1, TP53INP1	391	565	13528	2.14327	0.0750521	0.00210637	0.0700862
GOTERM_BP_FAT	GO:0031397~negative regulation of protein ubiquitination	11	2.43902	4.89749e-05	PSMA2, PSMB5, MAD2L1, PSMD13, PSMB1, PSMC4, PSMA4, PSMB3, UBB, PSMA7, RPS27A	391	74	13528	5.14302	0.0889455	0.00244838	0.0836766
GOTERM_BP_FAT	GO:0006605~protein targeting	19	4.21286	5.1665e-05	SRP14, MYO6, RAN, TIMM17A, TIMM10, EIF5A, YWHAE, SSR1, SEC61B, TOMM7, RPL23, TOMM5, TOMM20, NOP58, RPL11, SRP72, KPNA2, SSR2, SRP9	391	215	13528	3.05754	0.0935953	0.00251656	0.0882709
GOTERM_BP_FAT	GO:0045454~cell redox homeostasis	10	2.21729	7.48837e-05	GSR, TXN2, TXNDC5, TXN, PRDX5, TXNRD1, PRDX2, PDIA4, APEX1, PRDX1	391	63	13528	5.49182	0.132755	0.00355452	0.127917
GOTERM_BP_FAT	GO:0022900~electron transport chain	13	2.88248	0.000108635	NDUFB3, NDUFA4, NDUFB4, NDUFS5, NDUFB11, TXN2, UQCRH, TXN, CYC1, NDUFAB1, TXNRD1, UQCRFS1, NDUFA1	391	114	13528	3.94544	0.186684	0.00502721	0.185521
GOTERM_BP_FAT	GO:0034621~cellular macromolecular complex subunit organization	25	5.54324	0.000109309	HMGB2, SNRPD3, FKBP4, NAP1L1, SNRPD2, TFAM, NDUFS5, SET, PRMT5, NPM1, TUBA1B, TCP1, HSP90AA1, NIP7, RPL24, HMGA1, TBCA, RPS14, SNRPB, H3F3A, H3F3B, HSPD1, STMN1, SNRPC, SNRPE, XRN2	391	357	13528	2.42286	0.187726	0.00493818	0.186671
GOTERM_BP_FAT	GO:0034660~ncRNA metabolic process	19	4.21286	0.00012238	RPL35A, RPL14, MKI67IP, RPS6, FBL, RPF1, RPS7, RPS16, RPL7, RPS14, NOP58, RPL5, RPL11, NOP56, TRUB1, IMP4, TRUB2, NSA2, RPS24	391	230	13528	2.85813	0.207673	0.0053989	0.208971
GOTERM_BP_FAT	GO:0022618~ribonucleoprotein complex assembly	10	2.21729	0.000154004	NIP7, PRMT5, RPS14, SNRPD3, NPM1, SNRPB, SNRPD2, RPL24, SNRPC, SNRPE	391	69	13528	5.01427	0.253932	0.00663558	0.262903
GOTERM_BP_FAT	GO:0042493~response to drug	18	3.99113	0.000176647	TXNIP, SRP14, MAT2A, TXN2, UQCRFS1, GAL, PNP, PARK7, NME2, CCND1, CDKN1A, CPOX, NPPC, DAD1, PEBP1, HSD11B2, SRP72, CSAG3	391	216	13528	2.88321	0.285386	0.00743915	0.301503
GOTERM_BP_FAT	GO:0042981~regulation of apoptosis	42	9.31264	0.000268434	XRCC5, HMGB1, CLU, BNIP3, PRDX5, SOX4, EIF5A, PRDX2, PRDX1, RPS3, TRIAP1, RPS3A, HMOX1, NPM1, DAD1, TPT1, GLO1, RPL11, HSPA5, MYC, TOP2A, API5, RPS27A, ADAM9, TXNIP, CDK1, RPS6, GAL, YWHAE, NME2, HSP90B1, CDKN1A, RPS3AP5, TXNDC5, VEGFA, HSPB1, BIK, CFDP1, HSPD1, TNFSF12-TNFSF13, UBB, DAP3, TP53INP1	391	804	13528	1.80738	0.399882	0.0110393	0.457826
GOTERM_BP_FAT	GO:0006613~cotranslational protein targeting to membrane	5	1.10865	0.000280176	SRP14, SRP72, SSR2, SRP9, SSR1	391	12	13528	14.416	0.41314	0.0112757	0.477808
GOTERM_BP_FAT	GO:0043067~regulation of programmed cell death	42	9.31264	0.00032913	XRCC5, HMGB1, CLU, BNIP3, PRDX5, SOX4, EIF5A, PRDX2, PRDX1, RPS3, TRIAP1, RPS3A, HMOX1, NPM1, DAD1, TPT1, GLO1, RPL11, HSPA5, MYC, TOP2A, API5, RPS27A, ADAM9, TXNIP, CDK1, RPS6, GAL, YWHAE, NME2, HSP90B1, CDKN1A, RPS3AP5, TXNDC5, VEGFA, HSPB1, BIK, CFDP1, HSPD1, TNFSF12-TNFSF13, UBB, DAP3, TP53INP1	391	812	13528	1.78958	0.465332	0.0129592	0.561073
GOTERM_BP_FAT	GO:0046907~intracellular transport	36	7.98226	0.000343999	SRP14, CHMP5, TIMM17A, COPZ1, TIMM10, EIF5A, BNIP3, LMAN1, SSR1, TOMM7, SET, TOMM5, NPM1, RANBP1, RPL11, RAMP1, HSPA8, SCAMP1, KDELR2, HSP90AA1, MYO6, RAN, SLC25A6, YWHAE, UXT, NPC1, SEC61B, RPL23, TXNDC5, TOMM20, NOP58, SRP72, MRPL45, KPNA2, SSR2, SRP9	391	657	13528	1.89581	0.480246	0.0132663	0.58635
GOTERM_BP_FAT	GO:0006259~DNA metabolic process	30	6.65188	0.000346819	PTGES3, XRCC5, MORF4L1, HMGB1, HMGB2, MORF4L2, XRCC6, NAP1L1, BNIP3, PTTG1, TK1, RPA1, NONO, TFAM, SET, MCM7, MYC, TOP2A, APEX1, CIB1, RAN, HMGA1, RFC3, PPIA, TDG, RUVBL1, HSPD1, KPNA2, XRN2, DSCC1	391	506	13528	2.05129	0.483027	0.0131086	0.591144
GOTERM_BP_FAT	GO:0010941~regulation of cell death	42	9.31264	0.000353476	XRCC5, HMGB1, CLU, BNIP3, PRDX5, SOX4, EIF5A, PRDX2, PRDX1, RPS3, TRIAP1, RPS3A, HMOX1, NPM1, DAD1, TPT1, GLO1, RPL11, HSPA5, MYC, TOP2A, API5, RPS27A, ADAM9, TXNIP, CDK1, RPS6, GAL, YWHAE, NME2, HSP90B1, CDKN1A, RPS3AP5, TXNDC5, VEGFA, HSPB1, BIK, CFDP1, HSPD1, TNFSF12-TNFSF13, UBB, DAP3, TP53INP1	391	815	13528	1.78299	0.489533	0.0130984	0.602457
GOTERM_BP_FAT	GO:0034622~cellular macromolecular complex assembly	22	4.87805	0.000370753	HMGB2, TCP1, HSP90AA1, NIP7, SNRPD3, FKBP4, NAP1L1, SNRPD2, RPL24, TFAM, NDUFS5, SET, TBCA, RPS14, PRMT5, NPM1, SNRPB, H3F3A, H3F3B, SNRPC, HSPD1, TUBA1B, SNRPE	391	318	13528	2.3936	0.506041	0.013472	0.631817
GOTERM_BP_FAT	GO:0006448~regulation of translational elongation	4	0.886918	0.000445705	SRP14, EIF5A, RPS5, SRP9	391	6	13528	23.0656	0.571695	0.0158712	0.759087
GOTERM_BP_FAT	GO:0006886~intracellular protein transport	24	5.32151	0.000537066	SRP14, KDELR2, MYO6, RAN, TIMM17A, COPZ1, TIMM10, EIF5A, YWHAE, SSR1, SEC61B, TOMM7, RPL23, TOMM5, NPM1, TOMM20, NOP58, RPL11, SRP72, MRPL45, KPNA2, RAMP1, SRP9, SSR2	391	374	13528	2.22022	0.640044	0.0187438	0.914015
GOTERM_BP_FAT	GO:0006417~regulation of translation	13	2.88248	0.000604366	SARNP, EIF4B, SRP14, EIF4EBP1, EIF4H, EIF2S1, EIF3E, HSPB1, EIF5A, EIF1, CDK4, RPS5, SRP9	391	137	13528	3.28307	0.683316	0.0206894	1.02799
GOTERM_BP_FAT	GO:0007005~mitochondrion organization	13	2.88248	0.000645117	TFAM, NDUFS5, HSP90AA1, TOMM7, GGCT, TOMM5, TIMM17A, CLU, TIMM10, TOMM20, BNIP3, MYC, DAP3	391	138	13528	3.25928	0.706949	0.0216795	1.09695
GOTERM_BP_FAT	GO:0006446~regulation of translational initiation	7	1.55211	0.00105706	EIF4B, EIF4EBP1, EIF4H, EIF2S1, EIF3E, HSPB1, EIF1	391	41	13528	5.90706	0.866224	0.0346756	1.79148
GOTERM_BP_FAT	GO:0033365~protein localization in organelle	13	2.88248	0.00106188	SRP14, SEC61B, TOMM7, RPL23, TOMM5, RAN, TIMM17A, TIMM10, TOMM20, NOP58, SRP72, KPNA2, SRP9	391	146	13528	3.08069	0.867446	0.0342408	1.79957
GOTERM_BP_FAT	GO:0000387~spliceosomal snRNP biogenesis	6	1.33038	0.00110325	PRMT5, SNRPD3, SNRPB, SNRPD2, SNRPC, SNRPE	391	28	13528	7.41396	0.877488	0.0349599	1.86907
GOTERM_BP_FAT	GO:0019047~provirus integration	4	0.886918	0.00119524	XRCC5, PPIA, XRCC6, HMGA1	391	8	13528	17.2992	0.897173	0.0372022	2.02342
GOTERM_BP_FAT	GO:0006266~DNA ligation	4	0.886918	0.00119524	HMGB1, HMGB2, XRCC6, TOP2A	391	8	13528	17.2992	0.897173	0.0372022	2.02342
GOTERM_BP_FAT	GO:0030069~lysogeny	4	0.886918	0.00119524	XRCC5, PPIA, XRCC6, HMGA1	391	8	13528	17.2992	0.897173	0.0372022	2.02342
GOTERM_BP_FAT	GO:0006974~response to DNA damage stimulus	23	5.09978	0.00122976	XRCC5, MORF4L1, MRPS35, CDK1, HMGB1, HMGB2, MYO6, MORF4L2, XRCC6, PTTG1, RPS3, NONO, RPA1, TRIAP1, RFC3, CCND1, CDKN1A, MCM7, HMOX1, TDG, TOP2A, APEX1, CIB1	391	373	13528	2.13342	0.903715	0.0376411	2.08127
GOTERM_BP_FAT	GO:0055114~oxidation reduction	33	7.31707	0.00170418	NDUFB3, NDUFB4, LDHB, LDHA, KDM6A, TXN2, CYC1, NDUFAB1, PRDX5, PRDX2, UQCRFS1, COX5A, PRDX1, MTHFD2, KDM1A, GSR, NDUFS5, HMOX1, CPOX, GAPDH, IMPDH2, NDUFA4, NDUFB11, PTGR1, MAOA, IDH3B, NDUFA1, PYCR2, UQCRH, TXN, HSD11B2, TXNRD1, DEGS1	391	639	13528	1.78678	0.960997	0.050979	2.87323
GOTERM_BP_FAT	GO:0007049~cell cycle	38	8.42572	0.00178925	CETN2, PTTG1, PSMA7, CCNG1, UHMK1, SESN3, PSMB5, RPA1, MCM7, PSMB1, OIP5, PSMB3, NPM1, RANBP1, MYC, RPS27A, TXNIP, CDK1, ERH, RAN, RPL24, PBK, CDK4, PSMA2, CCNB1, CCND1, CDKN1A, PSMD13, MAD2L1, PSMC4, PSMA4, CKS2, RUVBL1, STMN1, UBB, KPNA2, DSCC1, TP53INP1	391	776	13528	1.69425	0.966833	0.0526311	3.01461
GOTERM_BP_FAT	GO:0034613~cellular protein localization	24	5.32151	0.00190676	SRP14, KDELR2, MYO6, RAN, TIMM17A, COPZ1, TIMM10, EIF5A, YWHAE, SSR1, SEC61B, TOMM7, RPL23, TOMM5, NPM1, TOMM20, NOP58, RPL11, SRP72, MRPL45, KPNA2, RAMP1, SRP9, SSR2	391	411	13528	2.02035	0.973487	0.055142	3.20957
GOTERM_BP_FAT	GO:0045333~cellular respiration	10	2.21729	0.00191617	NDUFB3, NDUFA4, NDUFB4, NDUFS5, UQCRH, SUCLG1, NDUFAB1, IDH3B, NDUFA1, FH	391	97	13528	3.56685	0.973958	0.054578	3.22517
GOTERM_BP_FAT	GO:0070727~cellular macromolecule localization	24	5.32151	0.00207539	SRP14, KDELR2, MYO6, RAN, TIMM17A, COPZ1, TIMM10, EIF5A, YWHAE, SSR1, SEC61B, TOMM7, RPL23, TOMM5, NPM1, TOMM20, NOP58, RPL11, SRP72, MRPL45, KPNA2, RAMP1, SRP9, SSR2	391	414	13528	2.00571	0.980774	0.058114	3.4887
GOTERM_BP_FAT	GO:0006096~glycolysis	7	1.55211	0.00218353	LDHB, TPI1, LDHA, PGAM1, PGK1, GAPDH, ENO1	391	47	13528	5.15296	0.984355	0.060168	3.66732
GOTERM_BP_FAT	GO:0006612~protein targeting to membrane	6	1.33038	0.0023677	SRP14, TIMM10, SRP72, SSR2, SRP9, SSR1	391	33	13528	6.29063	0.988987	0.0641541	3.97076
GOTERM_BP_FAT	GO:0042255~ribosome assembly	4	0.886918	0.00245333	NIP7, RPS14, NPM1, RPL24	391	10	13528	13.8394	0.990646	0.0654681	4.11154
GOTERM_BP_FAT	GO:0016071~mRNA metabolic process	22	4.87805	0.00250277	SF3B14, SNRPD3, HNRNPA2B1, SYNCRIP, SNRPD2, PNN, SLBP, NONO, HNRNPK, SERBP1, PRMT5, HNRNPF, PCBP1, EIF3E, VEGFA, SNRPB, SNRPC, HNRNPC, PABPC1, SNRPE, XRN2, PRPF38A	391	370	13528	2.05721	0.991488	0.0658227	4.19274
GOTERM_BP_FAT	GO:0010035~response to inorganic substance	15	3.32594	0.00251641	TXNIP, PRDX5, PRDX2, PRDX1, PARK7, NPC1, CCND1, CDKN1A, HMOX1, CPOX, PEBP1, NDRG1, ASNA1, MB, ADAM9	391	205	13528	2.5316	0.991706	0.065269	4.21514
GOTERM_BP_FAT	GO:0006979~response to oxidative stress	13	2.88248	0.00284629	TXNIP, PSMB5, NDUFB4, TXN2, HMOX1, CLU, PEBP1, PRDX5, PRDX2, PRDX1, PARK7, ADAM9, MB	391	164	13528	2.74256	0.995579	0.0725316	4.75513
GOTERM_BP_FAT	GO:0032270~positive regulation of cellular protein metabolic process	16	3.54767	0.00314256	CDK1, EIF5A, CDK4, PSMA7, PSMB5, CCNB1, PSMA2, CCND1, PSMD13, PSMB1, PSMC4, PSMB3, PSMA4, UBB, RPS27A, ADAM9	391	233	13528	2.37586	0.997488	0.0787352	5.23768
GOTERM_BP_FAT	GO:0006839~mitochondrial transport	8	1.77384	0.00363967	HSP90AA1, TOMM7, TOMM5, SLC25A6, TIMM17A, TIMM10, TOMM20, BNIP3	391	69	13528	4.01142	0.999027	0.0894622	6.04215
GOTERM_BP_FAT	GO:0008380~RNA splicing	18	3.99113	0.00368055	SF3B14, PPAN-P2RY11, SNRPD3, HNRNPA2B1, SYNCRIP, SNRPD2, PNN, NONO, HNRNPK, PRMT5, HNRNPF, PCBP1, SNRPB, SNRPC, HNRNPC, PABPC1, SNRPE, PRPF38A	391	284	13528	2.19286	0.9991	0.0892719	6.10802
GOTERM_BP_FAT	GO:0033554~cellular response to stress	29	6.43016	0.00386303	MORF4L1, XRCC5, MRPS35, HMGB1, HMGB2, MORF4L2, XRCC6, PRDX5, PRDX2, PTTG1, PRDX1, RPS3, NONO, RPA1, TRIAP1, MCM7, HMOX1, HSPA5, TOP2A, APEX1, CIB1, CDK1, MYO6, RFC3, ATF4, CDKN1A, CCND1, EIF2S1, TDG	391	566	13528	1.77271	0.999365	0.0923212	6.40153
GOTERM_BP_FAT	GO:0006511~ubiquitin-dependent protein catabolic process	16	3.54767	0.00450199	CDK1, PSMA7, PSMB5, CCNB1, PSMA2, HSP90B1, SEC61B, MAD2L1, PSMD13, PSMB1, PSMC4, UBE2K, PSMB3, PSMA4, UBB, RPS27A	391	242	13528	2.2875	0.999813	0.105469	7.42243
GOTERM_BP_FAT	GO:0051247~positive regulation of protein metabolic process	16	3.54767	0.00467772	CDK1, EIF5A, CDK4, PSMA7, PSMB5, CCNB1, PSMA2, CCND1, PSMD13, PSMB1, PSMC4, PSMB3, PSMA4, UBB, RPS27A, ADAM9	391	243	13528	2.27809	0.999866	0.108038	7.70136
GOTERM_BP_FAT	GO:0000375~RNA splicing, via transesterification reactions	12	2.66075	0.00479362	HNRNPK, SF3B14, PRMT5, PCBP1, HNRNPF, SNRPD3, HNRNPA2B1, SNRPB, SNRPD2, SNRPC, HNRNPC, SNRPE	391	153	13528	2.71361	0.999893	0.109247	7.88489
GOTERM_BP_FAT	GO:0000398~nuclear mRNA splicing, via spliceosome	12	2.66075	0.00479362	HNRNPK, SF3B14, PRMT5, PCBP1, HNRNPF, SNRPD3, HNRNPA2B1, SNRPB, SNRPD2, SNRPC, HNRNPC, SNRPE	391	153	13528	2.71361	0.999893	0.109247	7.88489
GOTERM_BP_FAT	GO:0000377~RNA splicing, via transesterification reactions with bulged adenosine as nucleophile	12	2.66075	0.00479362	HNRNPK, SF3B14, PRMT5, PCBP1, HNRNPF, SNRPD3, HNRNPA2B1, SNRPB, SNRPD2, SNRPC, HNRNPC, SNRPE	391	153	13528	2.71361	0.999893	0.109247	7.88489
GOTERM_BP_FAT	GO:0042542~response to hydrogen peroxide	7	1.55211	0.00531691	TXNIP, HMOX1, PRDX2, PRDX1, PARK7, ADAM9, MB	391	56	13528	4.32481	0.999961	0.119043	8.70927
GOTERM_BP_FAT	GO:0042773~ATP synthesis coupled electron transport	7	1.55211	0.00531691	NDUFB3, NDUFA4, NDUFB4, NDUFS5, UQCRH, NDUFAB1, NDUFA1	391	56	13528	4.32481	0.999961	0.119043	8.70927
GOTERM_BP_FAT	GO:0042775~mitochondrial ATP synthesis coupled electron transport	7	1.55211	0.00531691	NDUFB3, NDUFA4, NDUFB4, NDUFS5, UQCRH, NDUFAB1, NDUFA1	391	56	13528	4.32481	0.999961	0.119043	8.70927
GOTERM_BP_FAT	GO:0015986~ATP synthesis coupled proton transport	6	1.33038	0.00556895	ATP5B, ATP5C1, ATP5G1, ATP5I, ATP5H, ATP5G3	391	40	13528	5.18977	0.999976	0.122899	9.10383
GOTERM_BP_FAT	GO:0015985~energy coupled proton transport, down electrochemical gradient	6	1.33038	0.00556895	ATP5B, ATP5C1, ATP5G1, ATP5I, ATP5H, ATP5G3	391	40	13528	5.18977	0.999976	0.122899	9.10383
GOTERM_BP_FAT	GO:0006397~mRNA processing	19	4.21286	0.00559675	SF3B14, SNRPD3, HNRNPA2B1, SYNCRIP, SNRPD2, PNN, SLBP, NONO, HNRNPK, PRMT5, HNRNPF, PCBP1, SNRPB, SNRPC, HNRNPC, PABPC1, SNRPE, XRN2, PRPF38A	391	321	13528	2.04788	0.999977	0.122064	9.14726
GOTERM_BP_FAT	GO:0000302~response to reactive oxygen species	8	1.77384	0.00578271	TXNIP, HMOX1, PRDX5, PRDX2, PRDX1, PARK7, ADAM9, MB	391	75	13528	3.6905	0.999984	0.124447	9.43722
GOTERM_BP_FAT	GO:0006261~DNA-dependent DNA replication	7	1.55211	0.00631768	RPA1, HMGB1, TFAM, RFC3, HMGB2, MCM7, HMGA1	391	58	13528	4.17568	0.999994	0.133683	10.2665
GOTERM_BP_FAT	GO:0006007~glucose catabolic process	7	1.55211	0.00631768	LDHB, TPI1, LDHA, PGAM1, PGK1, GAPDH, ENO1	391	58	13528	4.17568	0.999994	0.133683	10.2665
GOTERM_BP_FAT	GO:0006268~DNA unwinding during replication	4	0.886918	0.0068305	HMGB1, HMGB2, MCM7, HMGA1	391	14	13528	9.88528	0.999998	0.142185	11.0548
GOTERM_BP_FAT	GO:0006120~mitochondrial electron transport, NADH to ubiquinone	6	1.33038	0.00687017	NDUFB3, NDUFA4, NDUFB4, NDUFS5, NDUFAB1, NDUFA1	391	42	13528	4.94264	0.999998	0.141413	11.1155
GOTERM_BP_FAT	GO:0015031~protein transport	35	7.76053	0.00754904	SRP14, NACA, CHMP5, TIMM17A, COPZ1, TIMM10, EIF5A, PDIA4, LMAN1, SSR1, TOMM7, TOMM5, NPM1, RPL11, RAMP1, SCAMP1, KDELR2, GDI2, MYO6, RAN, NUPL1, YWHAE, RAB31, HSP90B1, SEC61B, RPL23, ARF4, MCFD2, TOMM20, NOP58, SRP72, MRPL45, KPNA2, SRP9, SSR2	391	762	13528	1.58917	0.999999	0.152669	12.1483
GOTERM_BP_FAT	GO:0031401~positive regulation of protein modification process	13	2.88248	0.00805113	PSMA2, CCNB1, PSMB5, CDK1, CCND1, PSMD13, PSMB1, PSMC4, PSMA4, PSMB3, UBB, PSMA7, RPS27A	391	187	13528	2.40524	1	0.160307	12.9049
GOTERM_BP_FAT	GO:0048872~homeostasis of number of cells	9	1.99557	0.00823749	RPA1, HMOX1, RPS14, VEGFA, PRDX2, PRDX1, FH, MB, RPS24	391	100	13528	3.11386	1	0.162028	13.1842
GOTERM_BP_FAT	GO:0045184~establishment of protein localization	35	7.76053	0.00869383	SRP14, NACA, CHMP5, TIMM17A, COPZ1, TIMM10, EIF5A, PDIA4, LMAN1, SSR1, TOMM7, TOMM5, NPM1, RPL11, RAMP1, SCAMP1, KDELR2, GDI2, MYO6, RAN, NUPL1, YWHAE, RAB31, HSP90B1, SEC61B, RPL23, ARF4, MCFD2, TOMM20, NOP58, SRP72, MRPL45, KPNA2, SRP9, SSR2	391	769	13528	1.5747	1	0.168507	13.8644
GOTERM_BP_FAT	GO:0046164~alcohol catabolic process	8	1.77384	0.00875305	LDHB, TPI1, LDHA, MAOA, PGAM1, PGK1, GAPDH, ENO1	391	81	13528	3.41713	1	0.167859	13.9523
GOTERM_BP_FAT	GO:0022904~respiratory electron transport chain	7	1.55211	0.0101378	NDUFB3, NDUFA4, NDUFB4, NDUFS5, UQCRH, NDUFAB1, NDUFA1	391	64	13528	3.78421	1	0.189948	15.984
GOTERM_BP_FAT	GO:0006310~DNA recombination	9	1.99557	0.0109122	NONO, RPA1, XRCC5, HMGB1, PPIA, XRCC6, RUVBL1, HSPD1, HMGA1	391	105	13528	2.96558	1	0.201004	17.1005
GOTERM_BP_FAT	GO:0006614~SRP-dependent cotranslational protein targeting to membrane	3	0.665188	0.0115146	SRP14, SRP72, SRP9	391	6	13528	17.2992	1	0.208906	17.9592
GOTERM_BP_FAT	GO:0031399~regulation of protein modification process	17	3.7694	0.0117957	CDK1, PSMA7, YWHAE, PSMB5, CCNB1, PSMA2, CCND1, PSMD13, SET, MAD2L1, PSMB1, PSMC4, PSMB3, PSMA4, PEBP1, UBB, RPS27A	391	295	13528	1.99381	1	0.211456	18.3571
GOTERM_BP_FAT	GO:0034101~erythrocyte homeostasis	6	1.33038	0.0130804	HMOX1, RPS14, VEGFA, PRDX1, MB, RPS24	391	49	13528	4.23655	1	0.229615	20.1523
GOTERM_BP_FAT	GO:0034220~ion transmembrane transport	6	1.33038	0.0130804	ATP5B, ATP5C1, ATP5G1, ATP5I, ATP5H, ATP5G3	391	49	13528	4.23655	1	0.229615	20.1523
GOTERM_BP_FAT	GO:0043065~positive regulation of apoptosis	22	4.87805	0.0132343	TXNIP, EIF5A, BNIP3, SOX4, RPS6, GAL, YWHAE, PRDX1, RPS3, CDKN1A, RPS3AP5, RPS3A, HMOX1, BIK, RPL11, UBB, TNFSF12-TNFSF13, HSPD1, TOP2A, MYC, RPS27A, TP53INP1, DAP3	391	430	13528	1.77015	1	0.229899	20.3648
GOTERM_BP_FAT	GO:0017038~protein import	10	2.21729	0.0135597	SEC61B, TOMM7, RPL23, TOMM5, RAN, TIMM17A, TIMM10, TOMM20, NOP58, KPNA2	391	131	13528	2.6411	1	0.23277	20.8125
GOTERM_BP_FAT	GO:0051276~chromosome organization	24	5.32151	0.0135871	PTGES3, XRCC5, MORF4L1, HMGB1, HMGB2, KDM6A, MORF4L2, XRCC6, NAP1L1, BNIP3, CBX3, PTTG1, HMGA1, RPA1, KDM1A, MAD2L1, SET, PRMT5, NPM1, H3F3A, LEO1, H3F3B, RUVBL1, TOP2A, DSCC1	391	485	13528	1.71209	1	0.231125	20.8501
GOTERM_BP_FAT	GO:0043068~positive regulation of programmed cell death	22	4.87805	0.013868	TXNIP, EIF5A, BNIP3, SOX4, RPS6, GAL, YWHAE, PRDX1, RPS3, CDKN1A, RPS3AP5, RPS3A, HMOX1, BIK, RPL11, UBB, TNFSF12-TNFSF13, HSPD1, TOP2A, MYC, RPS27A, TP53INP1, DAP3	391	433	13528	1.75789	1	0.233267	21.2346
GOTERM_BP_FAT	GO:0032392~DNA geometric change	4	0.886918	0.0140619	HMGB1, HMGB2, MCM7, HMGA1	391	18	13528	7.68855	1	0.234089	21.4988
GOTERM_BP_FAT	GO:0032508~DNA duplex unwinding	4	0.886918	0.0140619	HMGB1, HMGB2, MCM7, HMGA1	391	18	13528	7.68855	1	0.234089	21.4988
GOTERM_BP_FAT	GO:0019320~hexose catabolic process	7	1.55211	0.0143882	LDHB, TPI1, LDHA, PGAM1, PGK1, GAPDH, ENO1	391	69	13528	3.50999	1	0.236808	21.9417
GOTERM_BP_FAT	GO:0010942~positive regulation of cell death	22	4.87805	0.0148947	TXNIP, EIF5A, BNIP3, SOX4, RPS6, GAL, YWHAE, PRDX1, RPS3, CDKN1A, RPS3AP5, RPS3A, HMOX1, BIK, RPL11, UBB, TNFSF12-TNFSF13, HSPD1, TOP2A, MYC, RPS27A, TP53INP1, DAP3	391	435	13528	1.74981	1	0.242033	22.6246
GOTERM_BP_FAT	GO:0000279~M phase	18	3.99113	0.0149695	CDK1, RAN, CETN2, RPL24, PBK, PTTG1, CCNG1, RPA1, CCNB1, PSMD13, MAD2L1, OIP5, CKS2, RANBP1, RUVBL1, STMN1, KPNA2, DSCC1	391	329	13528	1.89293	1	0.241065	22.7249
GOTERM_BP_FAT	GO:0051726~regulation of cell cycle	18	3.99113	0.0157772	CDK1, RPS15A, RPL24, CDK4, CCNG1, CCNB1, TRIAP1, CCND1, CDKN1A, MAD2L1, PRMT5, BTG3, NPM1, CKS2, PEBP1, RANBP1, MYC, HSPA8	391	331	13528	1.88149	1	0.250292	23.8008
GOTERM_BP_FAT	GO:0006626~protein targeting to mitochondrion	5	1.10865	0.0159371	TOMM7, TOMM5, TIMM17A, TIMM10, TOMM20	391	34	13528	5.08801	1	0.25044	24.0121
GOTERM_BP_FAT	GO:0070585~protein localization in mitochondrion	5	1.10865	0.0159371	TOMM7, TOMM5, TIMM17A, TIMM10, TOMM20	391	34	13528	5.08801	1	0.25044	24.0121
GOTERM_BP_FAT	GO:0046365~monosaccharide catabolic process	7	1.55211	0.0163912	LDHB, TPI1, LDHA, PGAM1, PGK1, GAPDH, ENO1	391	71	13528	3.41112	1	0.25456	24.6093
GOTERM_BP_FAT	GO:0006986~response to unfolded protein	7	1.55211	0.0163912	HSP90AB1, HSPH1, CCND1, HSP90AA1, HSPB1, HSPD1, HSPA8	391	71	13528	3.41112	1	0.25456	24.6093
GOTERM_BP_FAT	GO:0022403~cell cycle phase	21	4.65632	0.0170172	CDK1, RAN, CETN2, RPL24, PBK, PTTG1, CDK4, CCNG1, RPA1, CCNB1, CDKN1A, CCND1, PSMD13, MAD2L1, OIP5, CKS2, RANBP1, STMN1, RUVBL1, KPNA2, DSCC1	391	414	13528	1.75499	1	0.260862	25.4251
GOTERM_BP_FAT	GO:0022411~cellular component disassembly	6	1.33038	0.0179388	SET, BNIP3, STMN1, HMGA1, MYC, XRN2	391	53	13528	3.91681	1	0.270842	26.6112
GOTERM_BP_FAT	GO:0009150~purine ribonucleotide metabolic process	10	2.21729	0.0184797	NME2, ATP5B, ATP5C1, OLA1, ATP5G1, ATP5I, PAICS, ATP5H, ATP5G3, IMPDH2	391	138	13528	2.50714	1	0.275679	27.2991
GOTERM_BP_FAT	GO:0015074~DNA integration	4	0.886918	0.0188298	XRCC5, PPIA, XRCC6, HMGA1	391	20	13528	6.91969	1	0.277998	27.7411
GOTERM_BP_FAT	GO:0009152~purine ribonucleotide biosynthetic process	9	1.99557	0.019882	NME2, ATP5B, ATP5C1, ATP5G1, ATP5I, PAICS, ATP5H, ATP5G3, IMPDH2	391	117	13528	2.66142	1	0.28897	29.0541
GOTERM_BP_FAT	GO:0070482~response to oxygen levels	10	2.21729	0.0209432	CDKN1A, HSP90B1, TXN2, HMOX1, VEGFA, NPPC, HSD11B2, BNIP3, MB, DDIT4	391	141	13528	2.45379	1	0.299707	30.3557
GOTERM_BP_FAT	GO:0010605~negative regulation of macromolecule metabolic process	32	7.09534	0.0210241	HSP90AB1, HMGB1, SRP14, HMGB2, BNIP3, CBX3, PSMA7, RPS3, PSMB5, KDM1A, EIF4EBP1, SET, PSMB1, PSMB3, EIF3E, NPM1, MYC, RPS27A, ENO1, YWHAE, PSMA2, PSMD13, MAD2L1, PSMC4, RPS14, PHB2, PSMA4, NPPC, PEBP1, RPS13, UBB, SRP9	391	734	13528	1.50838	1	0.298483	30.4541
GOTERM_BP_FAT	GO:0006260~DNA replication	12	2.66075	0.0219467	RPA1, HMGB1, TFAM, RFC3, HMGB2, MCM7, SET, NAP1L1, HMGA1, TOP2A, TK1, DSCC1	391	190	13528	2.18517	1	0.307205	31.5658
GOTERM_BP_FAT	GO:0008104~protein localization	37	8.20399	0.0219578	SRP14, NACA, CHMP5, TIMM17A, COPZ1, TIMM10, EIF5A, PDIA4, LMAN1, MXI1, SSR1, TOMM7, TMSB15A, TOMM5, NPM1, RPL11, RAMP1, SCAMP1, KDELR2, GDI2, MYO6, RAN, NUPL1, YWHAE, RAB31, HSP90B1, SEC61B, RPL23, ARF4, MCFD2, TOMM20, NOP58, SRP72, MRPL45, KPNA2, SSR2, SRP9	391	882	13528	1.45141	1	0.305139	31.5791
GOTERM_BP_FAT	GO:0043933~macromolecular complex subunit organization	31	6.87361	0.0231573	HMGB2, SNRPD3, FKBP4, NAP1L1, SNRPD2, MKI67IP, TFAM, NDUFS5, SET, PRMT5, NPM1, MYC, TUBA1B, DCTPP1, TCP1, HSP90AA1, NIP7, RPL24, HMGA1, TBCA, UQCRH, RPS14, SNRPB, H3F3A, PEBP1, H3F3B, VAMP3, HSPD1, STMN1, SNRPC, SNRPE, XRN2	391	710	13528	1.51064	1	0.316742	32.9994
GOTERM_BP_FAT	GO:0015980~energy derivation by oxidation of organic compounds	10	2.21729	0.0236349	NDUFB3, NDUFA4, NDUFB4, NDUFS5, UQCRH, SUCLG1, NDUFAB1, IDH3B, NDUFA1, FH	391	144	13528	2.40267	1	0.319914	33.557
GOTERM_BP_FAT	GO:0019059~initiation of viral infection	4	0.886918	0.0243841	XRCC5, PPIA, XRCC6, HMGA1	391	22	13528	6.29063	1	0.326028	34.4231
GOTERM_BP_FAT	GO:0043488~regulation of mRNA stability	4	0.886918	0.0243841	SERBP1, VEGFA, SYNCRIP, PABPC1	391	22	13528	6.29063	1	0.326028	34.4231
GOTERM_BP_FAT	GO:0045047~protein targeting to ER	3	0.665188	0.026098	SRP14, SRP72, SRP9	391	9	13528	11.5328	1	0.342393	36.3646
GOTERM_BP_FAT	GO:0009259~ribonucleotide metabolic process	10	2.21729	0.0265649	NME2, ATP5B, ATP5C1, OLA1, ATP5G1, ATP5I, PAICS, ATP5H, ATP5G3, IMPDH2	391	147	13528	2.35364	1	0.345065	36.884
GOTERM_BP_FAT	GO:0009260~ribonucleotide biosynthetic process	9	1.99557	0.0270528	NME2, ATP5B, ATP5C1, ATP5G1, ATP5I, PAICS, ATP5H, ATP5G3, IMPDH2	391	124	13528	2.51118	1	0.347907	37.4226
GOTERM_BP_FAT	GO:0006164~purine nucleotide biosynthetic process	10	2.21729	0.0275961	NME2, ATP5B, NPPC, ATP5C1, ATP5G1, ATP5I, PAICS, ATP5H, ATP5G3, IMPDH2	391	148	13528	2.33773	1	0.351264	38.0172
GOTERM_BP_FAT	GO:0042592~homeostatic process	32	7.09534	0.0281615	PTGES3, XRCC5, TXN2, ATP5B, F2RL1, XRCC6, LPAR3, PRDX5, BNIP3, PRDX2, PDIA4, PRDX1, RPA1, GSR, HMOX1, NPM1, TPT1, MYC, APEX1, FH, RPS24, MB, RPS6, PARK7, HSP90B1, NPC1, RPS14, TXNDC5, VEGFA, TXN, TXNRD1, ASNA1	391	751	13528	1.47424	1	0.354777	38.6303
GOTERM_BP_FAT	GO:0065003~macromolecular complex assembly	29	6.43016	0.0287512	HMGB2, SNRPD3, FKBP4, NAP1L1, SNRPD2, MKI67IP, TFAM, NDUFS5, SET, PRMT5, NPM1, MYC, TUBA1B, DCTPP1, TCP1, HSP90AA1, NIP7, RPL24, HMGA1, TBCA, UQCRH, RPS14, SNRPB, H3F3A, PEBP1, H3F3B, VAMP3, HSPD1, SNRPC, SNRPE	391	665	13528	1.50881	1	0.358464	39.2636
GOTERM_BP_FAT	GO:0043487~regulation of RNA stability	4	0.886918	0.0307256	SERBP1, VEGFA, SYNCRIP, PABPC1	391	24	13528	5.76641	1	0.375676	41.3399
GOTERM_BP_FAT	GO:0030433~ER-associated protein catabolic process	4	0.886918	0.0307256	HSP90B1, SEC61B, UBB, RPS27A	391	24	13528	5.76641	1	0.375676	41.3399
GOTERM_BP_FAT	GO:0015992~proton transport	6	1.33038	0.0309139	ATP5B, ATP5C1, ATP5G1, ATP5I, ATP5H, ATP5G3	391	61	13528	3.40313	1	0.375177	41.5344
GOTERM_BP_FAT	GO:0008284~positive regulation of cell proliferation	20	4.43459	0.03124	ODC1, CNBP, CLU, NAP1L1, EIF5A, RPS9, SOX4, RPS15A, CDK4, PNP, SSR1, RPA1, CCND1, CDKN1A, NME2, VEGFA, NPM1, SHC1, TNFSF12-TNFSF13, MYC	391	414	13528	1.67142	1	0.376004	41.8696
GOTERM_BP_FAT	GO:0007346~regulation of mitotic cell cycle	10	2.21729	0.0320035	TRIAP1, CDK1, CCND1, MAD2L1, PRMT5, BTG3, PEBP1, RANBP1, RPL24, MYC	391	152	13528	2.27621	1	0.380957	42.6478
GOTERM_BP_FAT	GO:0046685~response to arsenic	3	0.665188	0.0320092	CDKN1A, CPOX, ASNA1	391	10	13528	10.3795	1	0.378723	42.6536
GOTERM_BP_FAT	GO:0006090~pyruvate metabolic process	5	1.10865	0.0321755	LDHB, TPI1, LDHA, ATF4, SLC16A1	391	42	13528	4.11886	1	0.378016	42.8218
GOTERM_BP_FAT	GO:0044092~negative regulation of molecular function	17	3.7694	0.0331109	PRDX2, PSMA7, RPS3, PSMB5, PSMA2, KDM1A, CDKN1A, MAD2L1, PSMD13, PSMB1, PSMC4, HMOX1, PSMA4, PSMB3, UBB, HSPA5, RPS27A	391	334	13528	1.761	1	0.384411	43.759
GOTERM_BP_FAT	GO:0007093~mitotic cell cycle checkpoint	5	1.10865	0.0346967	TRIAP1, CDK1, CCND1, MAD2L1, RPL24	391	43	13528	4.02308	1	0.396495	45.315
GOTERM_BP_FAT	GO:0006818~hydrogen transport	6	1.33038	0.0348825	ATP5B, ATP5C1, ATP5G1, ATP5I, ATP5H, ATP5G3	391	63	13528	3.29509	1	0.39587	45.4946
GOTERM_BP_FAT	GO:0044275~cellular carbohydrate catabolic process	7	1.55211	0.0359453	LDHB, TPI1, LDHA, PGAM1, PGK1, GAPDH, ENO1	391	85	13528	2.84929	1	0.402951	46.5115
GOTERM_BP_FAT	GO:0034623~cellular macromolecular complex disassembly	4	0.886918	0.0378466	SET, STMN1, HMGA1, XRN2	391	26	13528	5.32284	1	0.417002	48.2862
GOTERM_BP_FAT	GO:0032984~macromolecular complex disassembly	4	0.886918	0.0378466	SET, STMN1, HMGA1, XRN2	391	26	13528	5.32284	1	0.417002	48.2862
GOTERM_BP_FAT	GO:0001666~response to hypoxia	9	1.99557	0.0401478	HSP90B1, TXN2, HMOX1, VEGFA, NPPC, HSD11B2, BNIP3, MB, DDIT4	391	134	13528	2.32378	1	0.43384	50.3601
GOTERM_BP_FAT	GO:0006284~base-excision repair	4	0.886918	0.0416949	HMGB1, HMGB2, TDG, APEX1	391	27	13528	5.1257	1	0.444001	51.71
GOTERM_BP_FAT	GO:0006163~purine nucleotide metabolic process	11	2.43902	0.043279	NME2, ATP5B, NPPC, ATP5C1, OLA1, ATP5G1, ATP5I, PAICS, ATP5H, ATP5G3, IMPDH2	391	186	13528	2.04615	1	0.454146	53.0565
GOTERM_BP_FAT	GO:0009165~nucleotide biosynthetic process	11	2.43902	0.043279	NME2, ATP5B, NPPC, ATP5C1, ATP5G1, ATP5I, PAICS, ATP5H, ATP5G3, PNP, IMPDH2	391	186	13528	2.04615	1	0.454146	53.0565
GOTERM_BP_FAT	GO:0006917~induction of apoptosis	16	3.54767	0.0450333	BNIP3, EIF5A, YWHAE, PRDX1, RPS3, CDKN1A, RPS3AP5, RPS3A, HMOX1, RPL11, BIK, UBB, TNFSF12-TNFSF13, MYC, RPS27A, DAP3, TP53INP1	391	320	13528	1.72992	1	0.465281	54.5062
GOTERM_BP_FAT	GO:0012502~induction of programmed cell death	16	3.54767	0.0457789	BNIP3, EIF5A, YWHAE, PRDX1, RPS3, CDKN1A, RPS3AP5, RPS3A, HMOX1, RPL11, BIK, UBB, TNFSF12-TNFSF13, MYC, RPS27A, DAP3, TP53INP1	391	321	13528	1.72453	1	0.468531	55.1096
GOTERM_BP_FAT	GO:0044271~nitrogen compound biosynthetic process	16	3.54767	0.0500862	ODC1, MAT2A, ATP5B, ATP5G1, PNP, ATP5G3, PYCR2, NME2, OAZ1, CPOX, NPPC, ATP5C1, ATP5I, PAICS, ATP5H, IMPDH2	391	325	13528	1.70331	1	0.497548	58.45
GOTERM_BP_FAT	GO:0009205~purine ribonucleoside triphosphate metabolic process	8	1.77384	0.0524668	NME2, ATP5B, ATP5C1, OLA1, ATP5G1, ATP5I, ATP5H, ATP5G3	391	117	13528	2.36571	1	0.511697	60.1944
GOTERM_BP_FAT	GO:0034654~nucleobase, nucleoside, nucleotide and nucleic acid biosynthetic process	11	2.43902	0.0534103	NME2, ATP5B, NPPC, ATP5C1, ATP5G1, ATP5I, PAICS, ATP5H, ATP5G3, PNP, IMPDH2	391	193	13528	1.97193	1	0.515675	60.8664
GOTERM_BP_FAT	GO:0034404~nucleobase, nucleoside and nucleotide biosynthetic process	11	2.43902	0.0534103	NME2, ATP5B, NPPC, ATP5C1, ATP5G1, ATP5I, PAICS, ATP5H, ATP5G3, PNP, IMPDH2	391	193	13528	1.97193	1	0.515675	60.8664
GOTERM_BP_FAT	GO:0009199~ribonucleoside triphosphate metabolic process	8	1.77384	0.054463	NME2, ATP5B, ATP5C1, OLA1, ATP5G1, ATP5I, ATP5H, ATP5G3	391	118	13528	2.34566	1	0.5203	61.6037
GOTERM_BP_FAT	GO:0051186~cofactor metabolic process	11	2.43902	0.0565754	MTHFD2, GSR, LDHB, TPI1, HMOX1, SUCLG1, CPOX, IDH3B, GLO1, PNP, FH	391	195	13528	1.95171	1	0.531725	63.0438
GOTERM_BP_FAT	GO:0045900~negative regulation of translational elongation	2	0.443459	0.0568291	SRP14, SRP9	391	2	13528	34.5985	1	0.530938	63.2134
GOTERM_BP_FAT	GO:0006288~base-excision repair, DNA ligation	2	0.443459	0.0568291	HMGB1, HMGB2	391	2	13528	34.5985	1	0.530938	63.2134
GOTERM_BP_FAT	GO:0051187~cofactor catabolic process	4	0.886918	0.0589457	HMOX1, SUCLG1, IDH3B, FH	391	31	13528	4.46432	1	0.54195	64.5992
GOTERM_BP_FAT	GO:0008637~apoptotic mitochondrial changes	4	0.886918	0.0589457	GGCT, CLU, MYC, DAP3	391	31	13528	4.46432	1	0.54195	64.5992
GOTERM_BP_FAT	GO:0000087~M phase of mitotic cell cycle	12	2.66075	0.0604074	CCNB1, CDK1, MAD2L1, OIP5, RAN, CETN2, RPL24, RUVBL1, PBK, PTTG1, CCNG1, DSCC1	391	224	13528	1.85349	1	0.54859	65.5274
GOTERM_BP_FAT	GO:0051101~regulation of DNA binding	8	1.77384	0.0607335	KDM1A, NME2, HMOX1, NPM1, UBE2V1, PRDX2, APEX1, RPS3	391	121	13528	2.2875	1	0.548183	65.7313
GOTERM_BP_FAT	GO:0009144~purine nucleoside triphosphate metabolic process	8	1.77384	0.062918	NME2, ATP5B, ATP5C1, OLA1, ATP5G1, ATP5I, ATP5H, ATP5G3	391	122	13528	2.26875	1	0.558928	67.0684
GOTERM_BP_FAT	GO:0009206~purine ribonucleoside triphosphate biosynthetic process	7	1.55211	0.0638062	NME2, ATP5B, ATP5C1, ATP5G1, ATP5I, ATP5H, ATP5G3	391	98	13528	2.47132	1	0.561777	67.5978
GOTERM_BP_FAT	GO:0006518~peptide metabolic process	5	1.10865	0.0660329	GSR, MRPS35, SEC11C, MME, GLO1	391	53	13528	3.26401	1	0.572259	68.8902
GOTERM_BP_FAT	GO:0009145~purine nucleoside triphosphate biosynthetic process	7	1.55211	0.0663589	NME2, ATP5B, ATP5C1, ATP5G1, ATP5I, ATP5H, ATP5G3	391	99	13528	2.44636	1	0.571744	69.0753
GOTERM_BP_FAT	GO:0009201~ribonucleoside triphosphate biosynthetic process	7	1.55211	0.0663589	NME2, ATP5B, ATP5C1, ATP5G1, ATP5I, ATP5H, ATP5G3	391	99	13528	2.44636	1	0.571744	69.0753
GOTERM_BP_FAT	GO:0048255~mRNA stabilization	3	0.665188	0.0679752	VEGFA, SYNCRIP, PABPC1	391	15	13528	6.91969	1	0.578453	69.9777
GOTERM_BP_FAT	GO:0043489~RNA stabilization	3	0.665188	0.0679752	VEGFA, SYNCRIP, PABPC1	391	15	13528	6.91969	1	0.578453	69.9777
GOTERM_BP_FAT	GO:0006281~DNA repair	14	3.10421	0.0685951	MORF4L1, XRCC5, HMGB1, HMGB2, XRCC6, MORF4L2, PTTG1, NONO, RPA1, RFC3, TDG, TOP2A, APEX1, CIB1	391	284	13528	1.70556	1	0.579537	70.3172
GOTERM_BP_FAT	GO:0017148~negative regulation of translation	4	0.886918	0.0737392	SRP14, EIF4EBP1, EIF3E, SRP9	391	34	13528	4.07041	1	0.604647	72.9981
GOTERM_BP_FAT	GO:0009142~nucleoside triphosphate biosynthetic process	7	1.55211	0.0743702	NME2, ATP5B, ATP5C1, ATP5G1, ATP5I, ATP5H, ATP5G3	391	102	13528	2.3744	1	0.605567	73.3108
GOTERM_BP_FAT	GO:0006006~glucose metabolic process	9	1.99557	0.0753147	LDHB, TPI1, LDHA, ATF4, PGAM1, PGK1, GAPDH, MYC, ENO1	391	153	13528	2.0352	1	0.608068	73.7725
GOTERM_BP_FAT	GO:0006732~coenzyme metabolic process	9	1.99557	0.0753147	MTHFD2, GSR, LDHB, TPI1, SUCLG1, IDH3B, GLO1, PNP, FH	391	153	13528	2.0352	1	0.608068	73.7725
GOTERM_BP_FAT	GO:0051412~response to corticosterone stimulus	3	0.665188	0.0762474	CDKN1A, CCND1, PEBP1	391	16	13528	6.48721	1	0.610468	74.221
GOTERM_BP_FAT	GO:0009060~aerobic respiration	4	0.886918	0.0790028	UQCRH, SUCLG1, IDH3B, FH	391	35	13528	3.95411	1	0.621767	75.5042
GOTERM_BP_FAT	GO:0019725~cellular homeostasis	20	4.43459	0.0810596	TXN2, ATP5B, F2RL1, LPAR3, PRDX5, BNIP3, PRDX2, PDIA4, PRDX1, PARK7, GSR, HSP90B1, TXNDC5, TXN, NPM1, TPT1, TXNRD1, ASNA1, MYC, APEX1	391	466	13528	1.48491	1	0.629348	76.4227
GOTERM_BP_FAT	GO:0046034~ATP metabolic process	7	1.55211	0.0829087	ATP5B, ATP5C1, OLA1, ATP5G1, ATP5I, ATP5H, ATP5G3	391	105	13528	2.30656	1	0.635747	77.2206
GOTERM_BP_FAT	GO:0007021~tubulin complex assembly	2	0.443459	0.0840239	TCP1, TBCA	391	3	13528	23.0656	1	0.638633	77.6894
GOTERM_BP_FAT	GO:0042257~ribosomal subunit assembly	2	0.443459	0.0840239	RPS14, RPL24	391	3	13528	23.0656	1	0.638633	77.6894
GOTERM_BP_FAT	GO:0009141~nucleoside triphosphate metabolic process	8	1.77384	0.0847126	NME2, ATP5B, ATP5C1, OLA1, ATP5G1, ATP5I, ATP5H, ATP5G3	391	131	13528	2.11288	1	0.639535	77.9744
GOTERM_BP_FAT	GO:0031575~G1/S transition checkpoint	3	0.665188	0.0848177	TRIAP1, CCND1, RPL24	391	17	13528	6.10561	1	0.63779	78.0176
GOTERM_BP_FAT	GO:0051789~response to protein stimulus	7	1.55211	0.0888913	HSP90AB1, HSPH1, CCND1, HSP90AA1, HSPB1, HSPD1, HSPA8	391	107	13528	2.26345	1	0.653633	79.6314
GOTERM_BP_FAT	GO:0006308~DNA catabolic process	5	1.10865	0.0943847	RPA1, TDG, BNIP3, MYC, XRN2	391	60	13528	2.88321	1	0.674507	81.6317
GOTERM_BP_FAT	GO:0016052~carbohydrate catabolic process	7	1.55211	0.0951034	LDHB, TPI1, LDHA, PGAM1, PGK1, GAPDH, ENO1	391	109	13528	2.22192	1	0.675253	81.8793

## Sheet: down Hx MB468 GOs 
Category	Term	Count	%	PValue	Genes	List Total	Pop Hits	Pop Total	Fold Enrichment	Bonferroni	Benjamini	FDR
GOTERM_BP_FAT	GO:0031145~anaphase-promoting complex-dependent proteasomal ubiquitin-dependent protein catabolic process	21	3.69069	2.59979e-14	CDC20, UBE2C, PSMA7, PSMA2, PSMB4, PSMB7, PSMB6, MAD2L1, PSMB1, PSMC4, PSMA5, PSMB3, PSMA4, PSMC2, PSMC1, PSMA3, UBC, PSMD2, PSMD4, UBB, PSMD7	468	65	13528	9.33886	6.97802e-11	6.97802e-11	4.62075e-11
GOTERM_BP_FAT	GO:0051436~negative regulation of ubiquitin-protein ligase activity during mitotic cell cycle	21	3.69069	2.59979e-14	CDC20, UBE2C, PSMA7, PSMA2, PSMB4, PSMB7, PSMB6, MAD2L1, PSMB1, PSMC4, PSMA5, PSMB3, PSMA4, PSMC2, PSMC1, PSMA3, UBC, PSMD2, PSMD4, UBB, PSMD7	468	65	13528	9.33886	6.97802e-11	6.97802e-11	4.62075e-11
GOTERM_BP_FAT	GO:0031397~negative regulation of protein ubiquitination	22	3.86643	3.55584e-14	CDC20, UBE2C, PSMA7, PSMA2, PSMB4, PSMB7, PSMB6, MAD2L1, PSMB1, ATG5, PSMC4, PSMA5, PSMB3, PSMA4, PSMC2, PSMC1, PSMA3, UBC, PSMD2, PSMD4, UBB, PSMD7	468	74	13528	8.59367	9.54259e-11	4.77129e-11	6.31828e-11
GOTERM_BP_FAT	GO:0051352~negative regulation of ligase activity	21	3.69069	4.98683e-14	CDC20, UBE2C, PSMA7, PSMA2, PSMB4, PSMB7, PSMB6, MAD2L1, PSMB1, PSMC4, PSMA5, PSMB3, PSMA4, PSMC2, PSMC1, PSMA3, UBC, PSMD2, PSMD4, UBB, PSMD7	468	67	13528	9.06008	1.33894e-10	4.46315e-11	8.86513e-11
GOTERM_BP_FAT	GO:0051444~negative regulation of ubiquitin-protein ligase activity	21	3.69069	4.98683e-14	CDC20, UBE2C, PSMA7, PSMA2, PSMB4, PSMB7, PSMB6, MAD2L1, PSMB1, PSMC4, PSMA5, PSMB3, PSMA4, PSMC2, PSMC1, PSMA3, UBC, PSMD2, PSMD4, UBB, PSMD7	468	67	13528	9.06008	1.33894e-10	4.46315e-11	8.86513e-11
GOTERM_BP_FAT	GO:0051438~regulation of ubiquitin-protein ligase activity	22	3.86643	1.13089e-13	CDC20, UBE2C, PSMA7, FEM1A, PSMA2, PSMB4, PSMB7, PSMB6, MAD2L1, PSMB1, PSMC4, PSMA5, PSMB3, PSMA4, PSMC2, PSMC1, PSMA3, UBC, PSMD2, PSMD4, UBB, PSMD7	468	78	13528	8.15297	3.03872e-10	7.59679e-11	2.01206e-10
GOTERM_BP_FAT	GO:0051439~regulation of ubiquitin-protein ligase activity during mitotic cell cycle	21	3.69069	1.70779e-13	CDC20, UBE2C, PSMA7, PSMA2, PSMB4, PSMB7, PSMB6, MAD2L1, PSMB1, PSMC4, PSMA5, PSMB3, PSMA4, PSMC2, PSMC1, PSMA3, UBC, PSMD2, PSMD4, UBB, PSMD7	468	71	13528	8.54966	4.58641e-10	9.17282e-11	3.03679e-10
GOTERM_BP_FAT	GO:0031400~negative regulation of protein modification process	26	4.56942	2.45598e-13	CAV1, PSMA7, PSMB4, PSMB7, PSMB6, SET, ATG5, PSMB1, PSMB3, PSMD2, PSMD4, PSMD7, CDC20, UBE2C, YWHAE, PSMA2, MAD2L1, PSMC4, PSMA5, PSMA4, PSMC2, PSMC1, PSMA3, UBC, UBB, IGFBP3	468	119	13528	6.31559	6.59631e-10	1.09939e-10	4.36762e-10
GOTERM_BP_FAT	GO:0051340~regulation of ligase activity	22	3.86643	2.56073e-13	CDC20, UBE2C, PSMA7, FEM1A, PSMA2, PSMB4, PSMB7, PSMB6, MAD2L1, PSMB1, PSMC4, PSMA5, PSMB3, PSMA4, PSMC2, PSMC1, PSMA3, UBC, PSMD2, PSMD4, UBB, PSMD7	468	81	13528	7.85101	6.87663e-10	9.82375e-11	4.55325e-10
GOTERM_BP_FAT	GO:0031396~regulation of protein ubiquitination	24	4.21793	2.94732e-13	FBXO2, CDC20, UBE2C, PSMA7, FEM1A, PSMA2, PSMB4, PSMB7, PSMB6, MAD2L1, PSMB1, ATG5, PSMC4, PSMA5, PSMB3, PSMA4, PSMC2, PSMC1, PSMA3, UBC, PSMD2, PSMD4, UBB, PSMD7	468	100	13528	6.93744	7.91737e-10	9.89671e-11	5.24236e-10
GOTERM_BP_FAT	GO:0051437~positive regulation of ubiquitin-protein ligase activity during mitotic cell cycle	20	3.51494	8.16971e-13	CDC20, UBE2C, PSMA7, PSMA2, PSMB4, PSMB7, PSMB6, PSMB1, PSMC4, PSMA5, PSMB3, PSMA4, PSMC2, PSMC1, PSMA3, UBC, PSMD2, PSMD4, UBB, PSMD7	468	68	13528	8.50176	2.1945e-09	2.43833e-10	1.45306e-09
GOTERM_BP_FAT	GO:0051443~positive regulation of ubiquitin-protein ligase activity	20	3.51494	1.45156e-12	CDC20, UBE2C, PSMA7, PSMA2, PSMB4, PSMB7, PSMB6, PSMB1, PSMC4, PSMA5, PSMB3, PSMA4, PSMC2, PSMC1, PSMA3, UBC, PSMD2, PSMD4, UBB, PSMD7	468	70	13528	8.25885	3.89904e-09	3.89904e-10	2.5817e-09
GOTERM_BP_FAT	GO:0032268~regulation of cellular protein metabolic process	51	8.96309	1.45854e-12	HSP90AB1, EDN1, EIF5A, ATG5, PSMD2, PSMD4, PSMD7, ADAM9, EGFR, SOCS3, MAGOH, PKN1, UBE2C, PSMA2, EIF4G2, CCND1, MAD2L1, PSMA5, PSMA4, PSMA3, UBC, HSPB1, UBB, CAV1, TNF, KITLG, NFKBIA, PSMA7, FEM1A, TIMP1, LIF, PSMB4, PSMB7, SET, PSMB6, PSMB1, PSMB3, KRT7, ITGAV, THBS1, FBXO2, DDX1, CDC20, ETF1, YWHAE, PSMC4, EIF4H, PSMC2, PSMC1, IGFBP3, IL22RA2	468	474	13528	3.11014	3.91753e-09	3.56139e-10	2.59394e-09
GOTERM_BP_FAT	GO:0051248~negative regulation of protein metabolic process	31	5.44815	1.69989e-12	HSP90AB1, CAV1, PSMA7, TIMP1, PSMB4, PSMB7, PSMB6, SET, ATG5, PSMB1, PSMB3, ITGAV, PSMD2, PSMD4, THBS1, PSMD7, CDC20, UBE2C, YWHAE, FLNA, PSMA2, MAD2L1, PSMC4, PSMA5, PSMA4, PSMC2, PSMC1, PSMA3, UBC, UBB, IGFBP3	468	187	13528	4.7919	4.56583e-09	3.80486e-10	3.0232e-09
GOTERM_BP_FAT	GO:0051351~positive regulation of ligase activity	20	3.51494	3.3067e-12	CDC20, UBE2C, PSMA7, PSMA2, PSMB4, PSMB7, PSMB6, PSMB1, PSMC4, PSMA5, PSMB3, PSMA4, PSMC2, PSMC1, PSMA3, UBC, PSMD2, PSMD4, UBB, PSMD7	468	73	13528	7.91945	8.88176e-09	6.83213e-10	5.88094e-09
GOTERM_BP_FAT	GO:0032269~negative regulation of cellular protein metabolic process	30	5.27241	3.6116e-12	HSP90AB1, CAV1, PSMA7, TIMP1, PSMB4, PSMB7, PSMB6, SET, ATG5, PSMB1, PSMB3, ITGAV, PSMD2, PSMD4, THBS1, PSMD7, CDC20, UBE2C, YWHAE, PSMA2, MAD2L1, PSMC4, PSMA5, PSMA4, PSMC2, PSMC1, PSMA3, UBC, UBB, IGFBP3	468	180	13528	4.81766	9.70064e-09	6.92903e-10	6.42315e-09
GOTERM_BP_FAT	GO:0043161~proteasomal ubiquitin-dependent protein catabolic process	23	4.04218	3.90556e-12	FBXO2, CDC20, UBE2C, PSMA7, PSMA2, PSMB4, PSMB7, PSMB6, MAD2L1, PSMB1, PSMC4, VCP, PSMA5, PSMB3, PSMC2, PSMA4, PSMC1, PSMA3, UBC, PSMD2, PSMD4, UBB, PSMD7	468	102	13528	6.51802	1.04903e-08	6.99352e-10	6.94601e-09
GOTERM_BP_FAT	GO:0010498~proteasomal protein catabolic process	23	4.04218	3.90556e-12	FBXO2, CDC20, UBE2C, PSMA7, PSMA2, PSMB4, PSMB7, PSMB6, MAD2L1, PSMB1, PSMC4, VCP, PSMA5, PSMB3, PSMC2, PSMA4, PSMC1, PSMA3, UBC, PSMD2, PSMD4, UBB, PSMD7	468	102	13528	6.51802	1.04903e-08	6.99352e-10	6.94601e-09
GOTERM_BP_FAT	GO:0006916~anti-apoptosis	32	5.6239	4.08232e-12	YWHAZ, TNF, CCL2, MCL1, NFKBIA, BNIP3, HSPA1A, PEA15, SQSTM1, NPM1, TPT1, AATF, GLO1, THBS1, API5, CEBPB, SOCS3, ANXA1, ANXA5, SOD1, BIRC3, SOD2, AMIGO2, F3, TXNDC5, CFL1, UBC, SERPINB2, HSPB1, CFDP1, UBB, TNFAIP3	468	206	13528	4.49025	1.0965e-08	6.85314e-10	7.26035e-09
GOTERM_BP_FAT	GO:0031399~regulation of protein modification process	37	6.50264	3.91484e-11	CAV1, TNF, EDN1, KITLG, PSMA7, FEM1A, LIF, PSMB4, PSMB7, SET, PSMB6, ATG5, PSMB1, PSMB3, PSMD2, PSMD4, PSMD7, EGFR, SOCS3, FBXO2, PKN1, CDC20, UBE2C, YWHAE, PSMA2, CCND1, MAD2L1, PSMC4, PSMA5, PSMC2, PSMA4, PSMA3, PSMC1, UBC, UBB, IGFBP3, IL22RA2	468	295	13528	3.6255	1.05153e-07	6.18546e-09	6.96255e-08
GOTERM_BP_FAT	GO:0031398~positive regulation of protein ubiquitination	20	3.51494	4.82717e-11	CDC20, UBE2C, PSMA7, PSMA2, PSMB4, PSMB7, PSMB6, PSMB1, PSMC4, PSMA5, PSMB3, PSMA4, PSMC2, PSMC1, PSMA3, UBC, PSMD2, PSMD4, UBB, PSMD7	468	84	13528	6.88238	1.29658e-07	7.20321e-09	8.58512e-08
GOTERM_BP_FAT	GO:0043066~negative regulation of apoptosis	38	6.67838	1.77569e-09	YWHAZ, TNF, CCL2, MCL1, NFKBIA, BNIP3, HSPA1A, PEA15, ATG5, SQSTM1, NPM1, TPT1, RHOA, AATF, GLO1, THBS1, API5, EGFR, CEBPB, SOCS3, ANXA1, ANXA5, SOD1, BIRC3, SOD2, AMIGO2, NME2, CDKN1A, KRT18, TXNDC5, F3, CFL1, UBC, SERPINB2, HSPB1, CFDP1, UBB, TNFAIP3	468	354	13528	3.1029	4.7695e-06	2.51027e-07	3.15807e-06
GOTERM_BP_FAT	GO:0043069~negative regulation of programmed cell death	38	6.67838	2.61859e-09	YWHAZ, TNF, CCL2, MCL1, NFKBIA, BNIP3, HSPA1A, PEA15, ATG5, SQSTM1, NPM1, TPT1, RHOA, AATF, GLO1, THBS1, API5, EGFR, CEBPB, SOCS3, ANXA1, ANXA5, SOD1, BIRC3, SOD2, AMIGO2, NME2, CDKN1A, KRT18, TXNDC5, F3, CFL1, UBC, SERPINB2, HSPB1, CFDP1, UBB, TNFAIP3	468	359	13528	3.05969	7.0335e-06	3.51676e-07	4.65716e-06
GOTERM_BP_FAT	GO:0060548~negative regulation of cell death	38	6.67838	2.83194e-09	YWHAZ, TNF, CCL2, MCL1, NFKBIA, BNIP3, HSPA1A, PEA15, ATG5, SQSTM1, NPM1, TPT1, RHOA, AATF, GLO1, THBS1, API5, EGFR, CEBPB, SOCS3, ANXA1, ANXA5, SOD1, BIRC3, SOD2, AMIGO2, NME2, CDKN1A, KRT18, TXNDC5, F3, CFL1, UBC, SERPINB2, HSPB1, CFDP1, UBB, TNFAIP3	468	360	13528	3.05119	7.60656e-06	3.62218e-07	5.0366e-06
GOTERM_BP_FAT	GO:0042981~regulation of apoptosis	62	10.8963	4.53347e-09	RTN4, BNIP3, EIF5A, TGFB2, DYNLL1, ATG5, RHOA, TPT1, FOSL1, API5, ADAM9, EGFR, SOCS3, ACTN1, AMIGO2, NME2, KRT18, TXNDC5, F3, CFL1, UBC, CSTB, SERPINB2, HSPB1, CTSB, UBB, TNFAIP3, YWHAZ, CCL2, TNF, MCL1, NFKBIA, HSPA1A, CD70, PEA15, UTP11L, SQSTM1, NPM1, PYCARD, GLO1, AATF, HSPE1, THBS1, CEBPB, LGALS1, ANXA1, MAL, ANXA5, BIRC3, SOD1, YWHAE, BIRC2, SOD2, PLEKHF1, TNFSF10, CDKN1A, VCP, ETS1, EEF1E1…	468	804	13528	2.22907	1.21768e-05	5.53496e-07	8.06278e-06
GOTERM_BP_FAT	GO:0043067~regulation of programmed cell death	62	10.8963	6.52925e-09	RTN4, BNIP3, EIF5A, TGFB2, DYNLL1, ATG5, RHOA, TPT1, FOSL1, API5, ADAM9, EGFR, SOCS3, ACTN1, AMIGO2, NME2, KRT18, TXNDC5, F3, CFL1, UBC, CSTB, SERPINB2, HSPB1, CTSB, UBB, TNFAIP3, YWHAZ, CCL2, TNF, MCL1, NFKBIA, HSPA1A, CD70, PEA15, UTP11L, SQSTM1, NPM1, PYCARD, GLO1, AATF, HSPE1, THBS1, CEBPB, LGALS1, ANXA1, MAL, ANXA5, BIRC3, SOD1, YWHAE, BIRC2, SOD2, PLEKHF1, TNFSF10, CDKN1A, VCP, ETS1, EEF1E1…	468	812	13528	2.20711	1.75374e-05	7.62503e-07	1.16123e-05
GOTERM_BP_FAT	GO:0010941~regulation of cell death	62	10.8963	7.49645e-09	RTN4, BNIP3, EIF5A, TGFB2, DYNLL1, ATG5, RHOA, TPT1, FOSL1, API5, ADAM9, EGFR, SOCS3, ACTN1, AMIGO2, NME2, KRT18, TXNDC5, F3, CFL1, UBC, CSTB, SERPINB2, HSPB1, CTSB, UBB, TNFAIP3, YWHAZ, CCL2, TNF, MCL1, NFKBIA, HSPA1A, CD70, PEA15, UTP11L, SQSTM1, NPM1, PYCARD, GLO1, AATF, HSPE1, THBS1, CEBPB, LGALS1, ANXA1, MAL, ANXA5, BIRC3, SOD1, YWHAE, BIRC2, SOD2, PLEKHF1, TNFSF10, CDKN1A, VCP, ETS1, EEF1E1…	468	815	13528	2.19898	2.01353e-05	8.38977e-07	1.33324e-05
GOTERM_BP_FAT	GO:0032270~positive regulation of cellular protein metabolic process	29	5.09666	8.70226e-09	CAV1, TNF, NFKBIA, EIF5A, KITLG, PSMA7, LIF, PSMB4, PSMB7, PSMB6, PSMB1, PSMB3, PSMD2, PSMD4, THBS1, PSMD7, ADAM9, CDC20, UBE2C, PSMA2, CCND1, PSMC4, PSMA5, PSMA4, PSMC2, PSMC1, PSMA3, UBC, UBB	468	233	13528	3.59774	2.3374e-05	9.3497e-07	1.5477e-05
GOTERM_BP_FAT	GO:0051247~positive regulation of protein metabolic process	29	5.09666	2.20157e-08	CAV1, TNF, NFKBIA, EIF5A, KITLG, PSMA7, LIF, PSMB4, PSMB7, PSMB6, PSMB1, PSMB3, PSMD2, PSMD4, THBS1, PSMD7, ADAM9, CDC20, UBE2C, PSMA2, CCND1, PSMC4, PSMA5, PSMA4, PSMC2, PSMC1, PSMA3, UBC, UBB	468	243	13528	3.44969	5.91323e-05	2.27438e-06	3.91548e-05
GOTERM_BP_FAT	GO:0031401~positive regulation of protein modification process	25	4.39367	2.85997e-08	CAV1, TNF, KITLG, CDC20, UBE2C, PSMA7, LIF, PSMA2, PSMB4, PSMB7, CCND1, PSMB6, PSMB1, PSMC4, PSMA5, PSMB3, PSMA4, PSMC2, PSMC1, PSMA3, UBC, PSMD2, PSMD4, UBB, PSMD7	468	187	13528	3.86444	7.68159e-05	2.84514e-06	5.08646e-05
GOTERM_BP_FAT	GO:0006096~glycolysis	13	2.28471	4.33099e-08	ALDOA, LDHB, LDHA, PGAM1, PFKP, BPGM, GPI, TPI1, PGM1, PGK1, GAPDH, ENO1, MDH1	468	47	13528	7.99527	0.000116324	4.15465e-06	7.70266e-05
GOTERM_BP_FAT	GO:0044092~negative regulation of molecular function	33	5.79965	1.77107e-07	CAST, CAV1, GNAI3, NFKBIA, PSMA7, TGFB2, PSMB4, SUMO1, PSMB7, PSMB6, PSMB1, PSMB3, PSMD2, PSMD4, PSMD7, CDC20, UBE2C, FLNA, PSMA2, CDKN1A, MAD2L1, PSMC4, ID1, PSMA5, PSMA4, PSMC2, PSMC1, PSMA3, UBC, CSTB, UBB, GADD45A, CALM2	468	334	13528	2.85598	0.000475596	1.64036e-05	0.000314984
GOTERM_BP_FAT	GO:0043086~negative regulation of catalytic activity	29	5.09666	3.55315e-07	CAST, CAV1, GNAI3, PSMA7, TGFB2, PSMB4, PSMB7, PSMB6, PSMB1, PSMB3, PSMD2, PSMD4, PSMD7, CDC20, UBE2C, FLNA, PSMA2, CDKN1A, MAD2L1, PSMC4, PSMA5, PSMA4, PSMC2, PSMC1, PSMA3, UBC, CSTB, UBB, GADD45A	468	277	13528	3.02626	0.000953922	3.18121e-05	0.000631926
GOTERM_BP_FAT	GO:0070482~response to oxygen levels	20	3.51494	3.73978e-07	CAV1, ATP1B1, CCL2, SOCS3, IL18, EDN1, EGLN3, BNIP3, PDLIM1, CAPN2, BIRC2, SOD2, TGFB2, CDKN1A, HIF1A, CA9, PLOD2, SERPINA1, THBS1, MB	468	141	13528	4.10014	0.001004	3.24029e-05	0.000665117
GOTERM_BP_FAT	GO:0044093~positive regulation of molecular function	46	8.08436	4.04693e-07	CAV1, TNF, EDN1, UBE2V1, KITLG, DUSP12, PSMA7, TPM1, TGFB2, PSMB4, PSMB7, PSMB6, PSMB1, PSMB3, NPM1, PSMD2, PYCARD, PSMD4, HSPE1, CAP1, THBS1, PSMD7, ADAM9, EGFR, GABARAPL2, ICAM1, PKN1, CDC20, UBE2C, SOD1, PSMA2, NME2, CCND1, HIF1A, VCP, PSMC4, PSMA5, GNB1, PSMC2, PSMA4, F3, PSMA3, PSMC1, UBC, UBB, CALM2	468	586	13528	2.26907	0.00108641	3.39683e-05	0.000719744
GOTERM_BP_FAT	GO:0006007~glucose catabolic process	13	2.28471	5.23364e-07	ALDOA, LDHB, LDHA, PGAM1, PFKP, BPGM, GPI, TPI1, PGM1, PGK1, GAPDH, ENO1, MDH1	468	58	13528	6.47893	0.00140477	4.25977e-05	0.000930798
GOTERM_BP_FAT	GO:0019320~hexose catabolic process	14	2.46046	5.53594e-07	ALDOA, LDHB, LDHA, FUT8, PGAM1, PFKP, BPGM, GPI, TPI1, PGM1, PGK1, GAPDH, ENO1, MDH1	468	69	13528	5.86498	0.00148585	4.3733e-05	0.000984563
GOTERM_BP_FAT	GO:0000278~mitotic cell cycle	34	5.9754	5.93021e-07	TUBB2B, TUBB2A, ANAPC13, PSMA7, ITGB1, FAM83D, PSMB4, PSMB7, PSMB6, PSMB1, PSMB3, PSMD2, PSMD4, PSMD7, EGFR, RAN, CDC20, UBE2C, SUGT1, PSMA2, CCND1, CDKN1A, MAD2L1, PSMC4, PSMA5, PSMC2, PSMA4, PSMC1, PSMA3, UBC, UBB, MAPRE1, KPNA2, GADD45A	468	370	13528	2.65623	0.00159159	4.55091e-05	0.00105468
GOTERM_BP_FAT	GO:0043085~positive regulation of catalytic activity	42	7.38137	6.95292e-07	CAV1, TNF, EDN1, KITLG, DUSP12, PSMA7, TPM1, TGFB2, PSMB4, PSMB7, PSMB6, PSMB1, PSMB3, NPM1, PSMD2, PYCARD, PSMD4, HSPE1, CAP1, THBS1, PSMD7, ADAM9, EGFR, GABARAPL2, PKN1, CDC20, UBE2C, SOD1, PSMA2, CCND1, HIF1A, VCP, PSMC4, PSMA5, GNB1, PSMC2, PSMA4, F3, PSMA3, PSMC1, UBC, UBB	468	520	13528	2.33471	0.00186581	5.18752e-05	0.00123657
GOTERM_BP_FAT	GO:0046365~monosaccharide catabolic process	14	2.46046	7.81455e-07	ALDOA, LDHB, LDHA, FUT8, PGAM1, PFKP, BPGM, GPI, TPI1, PGM1, PGK1, GAPDH, ENO1, MDH1	468	71	13528	5.69977	0.00209679	5.67278e-05	0.00138981
GOTERM_BP_FAT	GO:0001666~response to hypoxia	19	3.33919	7.94805e-07	CAV1, ATP1B1, CCL2, SOCS3, IL18, EDN1, EGLN3, BNIP3, PDLIM1, CAPN2, BIRC2, SOD2, TGFB2, HIF1A, CA9, PLOD2, SERPINA1, THBS1, MB	468	134	13528	4.09861	0.00213257	5.61786e-05	0.00141355
GOTERM_BP_FAT	GO:0006511~ubiquitin-dependent protein catabolic process	26	4.56942	1.01387e-06	PSMA7, PSMB4, PSMB7, PSMB6, PSMB1, SQSTM1, PSMB3, PSMD2, PSMD4, PSMD7, USP14, FBXO2, CDC20, UBE2C, UBE2L3, PSMA2, MAD2L1, VCP, PSMC4, PSMA5, PSMA4, PSMC2, PSMC1, PSMA3, UBC, UBB	468	242	13528	3.1056	0.00271956	6.98248e-05	0.00180316
GOTERM_BP_FAT	GO:0044275~cellular carbohydrate catabolic process	15	2.6362	1.1307e-06	ALDOA, LDHB, LDHA, FUT8, PGAM1, PFKP, BPGM, GPI, TPI1, PYGL, PGM1, PGK1, GAPDH, ENO1, MDH1	468	85	13528	5.10106	0.00303245	7.59234e-05	0.00201092
GOTERM_BP_FAT	GO:0022402~cell cycle process	43	7.55712	2.34672e-06	TUBB2B, TUBB2A, ANAPC13, PSMA7, ITGB1, TGFB2, FAM83D, RPA1, PSMB4, PSMB7, PSMB6, PSMB1, PSMB3, KRT7, NPM1, PSMD2, PSMD4, THBS1, PSMD7, EGFR, IL8, RAN, CDC20, SUGT1, UBE2C, PSMA2, EIF4G2, PPM1G, CCND1, CDKN1A, MAD2L1, PSMC4, PSMA5, PSMC2, PSMA4, PSMA3, PSMC1, UBC, CKS2, MAPRE1, UBB, KPNA2, GADD45A	468	565	13528	2.19992	0.00628346	0.000153727	0.00417355
GOTERM_BP_FAT	GO:0046164~alcohol catabolic process	14	2.46046	3.68622e-06	ALDOA, LDHB, LDHA, FUT8, PGAM1, PFKP, BPGM, GPI, TPI1, PGM1, PGK1, GAPDH, ENO1, MDH1	468	81	13528	4.9961	0.00985234	0.000235715	0.00655573
GOTERM_BP_FAT	GO:0051603~proteolysis involved in cellular protein catabolic process	44	7.73286	4.60087e-06	ANAPC13, UBE2V1, PSMA7, FEM1A, PSMB4, SUMO1, PSMB7, PSMB6, ISG15, PSMB1, SQSTM1, PSMB3, CACYBP, PSMD2, PSMD4, PSMD7, USP14, ADAM9, SOCS3, ENC1, FBXO2, UBE2L6, CDC20, UBE2L3, UBE2C, SUGT1, UBL5, PSMA2, MAD2L1, VCP, PSMC4, PSMA5, BACE2, PSMC2, PSMA4, UBA2, PSMA3, PSMC1, UBC, DDB2, UBB, TNFAIP3, UBE2S, NEURL3	468	600	13528	2.11977	0.0122819	0.000287353	0.00818233
GOTERM_BP_FAT	GO:0016052~carbohydrate catabolic process	16	2.81195	4.85771e-06	ALDOA, LDHB, LDHA, FUT8, PGAM1, CHI3L1, PFKP, BPGM, GPI, TPI1, PYGL, PGM1, PGK1, GAPDH, ENO1, MDH1	468	109	13528	4.24308	0.0129631	0.000296498	0.00863909
GOTERM_BP_FAT	GO:0006986~response to unfolded protein	13	2.28471	5.00016e-06	HSP90AB1, HSP90AA1, HSPA1A, CLIC1, HSPH1, CCND1, VCP, DNAJA1, HSPB1, HSPE1, HSPA4, NFE2L2, HSPA8	468	71	13528	5.29264	0.0133407	0.00029841	0.00889241
GOTERM_BP_FAT	GO:0044257~cellular protein catabolic process	44	7.73286	5.14381e-06	ANAPC13, UBE2V1, PSMA7, FEM1A, PSMB4, SUMO1, PSMB7, PSMB6, ISG15, PSMB1, SQSTM1, PSMB3, CACYBP, PSMD2, PSMD4, PSMD7, USP14, ADAM9, SOCS3, ENC1, FBXO2, UBE2L6, CDC20, UBE2L3, UBE2C, SUGT1, UBL5, PSMA2, MAD2L1, VCP, PSMC4, PSMA5, BACE2, PSMC2, PSMA4, UBA2, PSMA3, PSMC1, UBC, DDB2, UBB, TNFAIP3, UBE2S, NEURL3	468	603	13528	2.10923	0.0137213	0.000300309	0.00914786
GOTERM_BP_FAT	GO:0043632~modification-dependent macromolecule catabolic process	42	7.38137	8.18766e-06	ANAPC13, UBE2V1, PSMA7, FEM1A, PSMB4, SUMO1, PSMB7, PSMB6, ISG15, PSMB1, SQSTM1, PSMB3, CACYBP, PSMD2, PSMD4, PSMD7, USP14, SOCS3, ENC1, FBXO2, UBE2L6, CDC20, UBE2L3, UBE2C, SUGT1, UBL5, PSMA2, MAD2L1, VCP, PSMC4, PSMA5, PSMC2, PSMA4, UBA2, PSMC1, PSMA3, UBC, DDB2, UBB, TNFAIP3, UBE2S, NEURL3	468	574	13528	2.11507	0.0217521	0.000467809	0.0145608
GOTERM_BP_FAT	GO:0019941~modification-dependent protein catabolic process	42	7.38137	8.18766e-06	ANAPC13, UBE2V1, PSMA7, FEM1A, PSMB4, SUMO1, PSMB7, PSMB6, ISG15, PSMB1, SQSTM1, PSMB3, CACYBP, PSMD2, PSMD4, PSMD7, USP14, SOCS3, ENC1, FBXO2, UBE2L6, CDC20, UBE2L3, UBE2C, SUGT1, UBL5, PSMA2, MAD2L1, VCP, PSMC4, PSMA5, PSMC2, PSMA4, UBA2, PSMC1, PSMA3, UBC, DDB2, UBB, TNFAIP3, UBE2S, NEURL3	468	574	13528	2.11507	0.0217521	0.000467809	0.0145608
GOTERM_BP_FAT	GO:0044265~cellular macromolecule catabolic process	49	8.6116	1.08561e-05	ANAPC13, UBE2V1, BNIP3, HSPA1A, PSMA7, FEM1A, RPA1, PSMB4, SUMO1, PSMB7, PSMB6, ISG15, PSMB1, SQSTM1, PSMB3, CACYBP, PSMD2, PSMD4, PSMD7, USP14, ADAM9, SOCS3, MAGOH, ENC1, FBXO2, UBE2L6, CDC20, UBE2L3, SUGT1, UBE2C, SOD1, UBL5, PSMA2, MAD2L1, VCP, PSMC4, PSMA5, BACE2, PSMC2, PSMA4, UBA2, PSMA3, PSMC1, UBC, DDB2, UBB, TNFAIP3, NEURL3, UBE2S	468	725	13528	1.95365	0.0287387	0.000607311	0.0193059
GOTERM_BP_FAT	GO:0030163~protein catabolic process	44	7.73286	1.09472e-05	ANAPC13, UBE2V1, PSMA7, FEM1A, PSMB4, SUMO1, PSMB7, PSMB6, ISG15, PSMB1, SQSTM1, PSMB3, CACYBP, PSMD2, PSMD4, PSMD7, USP14, ADAM9, SOCS3, ENC1, FBXO2, UBE2L6, CDC20, UBE2L3, UBE2C, SUGT1, UBL5, PSMA2, MAD2L1, VCP, PSMC4, PSMA5, BACE2, PSMC2, PSMA4, UBA2, PSMA3, PSMC1, UBC, DDB2, UBB, TNFAIP3, UBE2S, NEURL3	468	622	13528	2.0448	0.0289761	0.000599906	0.0194677
GOTERM_BP_FAT	GO:0006091~generation of precursor metabolites and energy	28	4.92091	1.17616e-05	ALDOA, LDHB, ATP6V0E1, LDHA, ATP5B, PGAM1, UQCRFS1, NDUFS5, TPI1, SLC1A3, ATP6V0D2, GAPDH, FH, ENO1, PFKP, FADS3, IDH3B, BPGM, SOD2, GPI, PYGL, ATP6V1E1, GFPT2, PGM1, TXN, ATP5C1, PGK1, MDH1	468	313	13528	2.58584	0.0310981	0.000631639	0.020916
GOTERM_BP_FAT	GO:0009057~macromolecule catabolic process	51	8.96309	1.71481e-05	BNIP3, ISG15, PSMD2, PSMD4, PSMD7, USP14, ADAM9, SOCS3, MAGOH, ENC1, UBE2C, PSMA2, MAD2L1, PSMA5, PSMA4, BACE2, PSMA3, DDB2, UBC, UBB, TNFAIP3, UBE2S, NEURL3, ANAPC13, UBE2V1, HSPA1A, PSMA7, FEM1A, RPA1, PSMB4, SUMO1, PSMB7, PSMB6, PSMB1, SQSTM1, PSMB3, CACYBP, FBXO2, CHI3L1, UBE2L6, CDC20, SOD1, SUGT1, UBE2L3, UBL5, PSMC4, VCP, PYGL, UBA2, PSMC2, PSMC1	468	781	13528	1.88759	0.0450156	0.000902734	0.0304935
GOTERM_BP_FAT	GO:0051789~response to protein stimulus	15	2.6362	1.80912e-05	HSP90AB1, HSP90AA1, HSPA1A, CLIC1, HSPH1, CCND1, VCP, ID1, DNAJA1, HSPB1, HSPA4, HSPE1, NFE2L2, HSPA8, CYR61	468	107	13528	4.05224	0.0474317	0.000934054	0.0321704
GOTERM_BP_FAT	GO:0006928~cell motion	36	6.32689	1.993e-05	CAV2, TNF, CCL2, FUT8, TNFRSF12A, ATP5B, KITLG, L1CAM, ARPC5, ITGB1, TPM1, DSTN, VCL, TGFB2, ACTG1, SAA2, DNAJA1, CAP1, MSN, THBS1, ACTB, ICAM1, IL8, ANXA1, YWHAE, TNS3, HIF1A, ID1, ETS1, ITGA5, CXCL16, CFL1, TXN, UBC, HSPB1, UBB	468	475	13528	2.19077	0.0521249	0.00100954	0.0354396
GOTERM_BP_FAT	GO:0045428~regulation of nitric oxide biosynthetic process	8	1.40598	2.7207e-05	EGFR, HSP90AB1, ICAM1, CAV1, HSP90AA1, TNF, EDN1, SOD2	468	27	13528	8.56474	0.0704727	0.0013524	0.0483766
GOTERM_BP_FAT	GO:0006412~translation	28	4.92091	3.19004e-05	EIF6, MRPS15, EEF1B2, RPL14, EIF5A, EIF3D, MRPL12, EIF3I, EIF3J, MRPL33, TNIP1, EIF3M, RPL36AL, EGFR, DARS, MRPS24, RPL13P12, ETF1, RPL39P5, EIF4G2, RPS18, EIF4H, EEF1A1P5, EEF1E1, RARS, UBC, UBB, FARSA	468	331	13528	2.44522	0.0821175	0.00155671	0.0567197
GOTERM_BP_FAT	GO:0008219~cell death	47	8.26011	3.84227e-05	RTN4, TNFRSF21, MICB, TNF, MCL1, TNFRSF12A, EGLN3, NFKBIA, BNIP3, L1CAM, HPRT1, TGFB2, PEA15, DAPL1, ATG5, DYNLL1, ATXN10, SQSTM1, KRT8, PYCARD, AATF, HSPE1, THBS1, API5, CIB1, OLR1, LGALS1, OPTN, BIRC3, SOD1, YWHAE, BIRC2, VDAC1, SOD2, PLEKHF1, EIF4G2, TNFSF10, PDCL3, KRT18, VCP, F3, UBC, HSPB1, UBB, TNFAIP3, PDCD5, GADD45A	468	719	13528	1.88954	0.0980583	0.00184126	0.0683127
GOTERM_BP_FAT	GO:0051270~regulation of cell motion	20	3.51494	3.96031e-05	EGFR, RTN4, ICAM1, EDN1, F2RL1, ACTN1, JAG1, TPM1, CXCL10, TGFB2, VCL, HIF1A, CLIC4, ETS1, CXCL16, F3, LAMB1, THBS1, IGFBP3, ADAM9	468	193	13528	2.99544	0.100913	0.0018645	0.0704106
GOTERM_BP_FAT	GO:0006457~protein folding	19	3.33919	4.09954e-05	HSP90AB1, TCP1, HSP90AA1, FKBP4, CCT2, CCT6A, CCT3, CCT7, TTC1, PFDN2, CCT5, PPIH, CCT4, PPIA, CCT8, DNAJA1, SEP15, HSPE1, HSPA8	468	177	13528	3.1029	0.10427	0.00189675	0.0728852
GOTERM_BP_FAT	GO:0016265~death	47	8.26011	4.47531e-05	RTN4, TNFRSF21, MICB, TNF, MCL1, TNFRSF12A, EGLN3, NFKBIA, BNIP3, L1CAM, HPRT1, TGFB2, PEA15, DAPL1, ATG5, DYNLL1, ATXN10, SQSTM1, KRT8, PYCARD, AATF, HSPE1, THBS1, API5, CIB1, OLR1, LGALS1, OPTN, BIRC3, SOD1, YWHAE, BIRC2, VDAC1, SOD2, PLEKHF1, EIF4G2, TNFSF10, PDCL3, KRT18, VCP, F3, UBC, HSPB1, UBB, TNFAIP3, PDCD5, GADD45A	468	724	13528	1.87649	0.113265	0.00203537	0.0795634
GOTERM_BP_FAT	GO:0033627~cell adhesion mediated by integrin	5	0.878735	4.5171e-05	ICAM1, ITGA5, L1CAM, ITGB1, ADAM9	468	7	13528	20.6471	0.11426	0.00202016	0.0803061
GOTERM_BP_FAT	GO:0007010~cytoskeleton organization	33	5.79965	4.91921e-05	ALDOA, CAV2, CAV1, CNN3, PLEK2, FERMT2, ARPC5, ITGB1, TPM1, DSTN, ACTG1, PFN1, DYNLL1, KRT7, KRT8, NPM1, RHOA, CNN2, CAP1, TUBA1B, KRT86, PLS3, RAN, FSCN1, ACTN1, TMSB10, SOD1, UBE2C, FLNA, LASP1, CFL1, CKS2, GADD45A	468	436	13528	2.18784	0.123776	0.00216378	0.0874521
GOTERM_BP_FAT	GO:0045429~positive regulation of nitric oxide biosynthetic process	7	1.23023	5.71585e-05	EGFR, HSP90AB1, ICAM1, HSP90AA1, TNF, EDN1, SOD2	468	21	13528	9.63533	0.142327	0.00247326	0.101608
GOTERM_BP_FAT	GO:0007049~cell cycle	49	8.6116	5.98025e-05	S100A6, TUBB2B, TUBB2A, ANAPC13, PSMA7, ITGB1, TGFB2, FAM83D, RPA1, PSMB4, PSMB7, PSMB6, PSMB1, PSMB3, KRT7, NPM1, PSMD2, KLK10, PSMD4, THBS1, PSMD7, EGFR, IL8, TRNP1, RAN, ANXA1, CDC20, SUGT1, UBE2C, PSMA2, EIF4G2, PPM1G, CCND1, CDKN1A, MAD2L1, KRT18, PSMC4, PSMA5, PSMC2, PSMA4, PSMA3, PSMC1, UBC, CKS2, MAPRE1, UBB, KPNA2, GADD45A, CALM2	468	776	13528	1.82525	0.148396	0.0025465	0.106305
GOTERM_BP_FAT	GO:0010647~positive regulation of cell communication	27	4.74517	7.56961e-05	CAV2, CAV1, TNF, CCL2, UBE2V1, PINK1, L1CAM, JAG1, TGFB2, LIF, SLC1A3, LANCL2, RHOA, THBS1, EGFR, KLK6, LGALS1, WLS, BIRC2, FLNA, IKBKE, TNFSF10, HIF1A, F3, EEF1E1, UBC, UBB	468	329	13528	2.37222	0.183989	0.00317195	0.13454
GOTERM_BP_FAT	GO:0030334~regulation of cell migration	18	3.16344	7.65068e-05	EGFR, RTN4, ICAM1, EDN1, F2RL1, JAG1, TPM1, TGFB2, VCL, CXCL10, HIF1A, CLIC4, CXCL16, F3, LAMB1, THBS1, IGFBP3, ADAM9	468	169	13528	3.07874	0.185764	0.00315663	0.13598
GOTERM_BP_FAT	GO:0040012~regulation of locomotion	19	3.33919	0.000118401	EGFR, RTN4, ICAM1, IL8, EDN1, F2RL1, JAG1, TPM1, CXCL10, TGFB2, VCL, HIF1A, CLIC4, CXCL16, F3, LAMB1, THBS1, IGFBP3, ADAM9	468	192	13528	2.86049	0.272429	0.00480725	0.210367
GOTERM_BP_FAT	GO:0040017~positive regulation of locomotion	13	2.28471	0.000136604	EGFR, ICAM1, HIF1A, IL8, CXCL16, F3, EDN1, F2RL1, LAMB1, THBS1, ADAM9, TGFB2, CXCL10	468	98	13528	3.83447	0.307152	0.00546181	0.242672
GOTERM_BP_FAT	GO:0051272~positive regulation of cell motion	13	2.28471	0.000136604	EGFR, ICAM1, HIF1A, ETS1, CXCL16, F3, EDN1, F2RL1, LAMB1, THBS1, ADAM9, TGFB2, CXCL10	468	98	13528	3.83447	0.307152	0.00546181	0.242672
GOTERM_BP_FAT	GO:0033631~cell-cell adhesion mediated by integrin	4	0.702988	0.000159327	ITGA5, L1CAM, ITGB1, ADAM9	468	4	13528	28.906	0.34818	0.00627417	0.282985
GOTERM_BP_FAT	GO:0001525~angiogenesis	16	2.81195	0.000183822	RTN4, IL8, TNFRSF12A, ATP5B, IL18, EDN1, JAG1, NCL, ANXA2, TGFB2, GPI, HIF1A, ID1, THBS1, TNFAIP2, CYR61	468	148	13528	3.12497	0.389692	0.00713085	0.326424
GOTERM_BP_FAT	GO:0030335~positive regulation of cell migration	12	2.10896	0.000237249	EGFR, ICAM1, HIF1A, CXCL16, F3, EDN1, F2RL1, LAMB1, THBS1, ADAM9, TGFB2, CXCL10	468	89	13528	3.89744	0.471296	0.00906333	0.421108
GOTERM_BP_FAT	GO:0010605~negative regulation of macromolecule metabolic process	45	7.90861	0.000245208	HSP90AB1, CAV1, TNF, EDN1, CBX3, BNIP3, PSMA7, TIMP1, PSMB4, SUMO1, PSMB7, PSMB6, SET, ATG5, PSMB1, DRAP1, PSMB3, LANCL2, ITGAV, NPM1, PSMD2, AATF, PSMD4, THBS1, PSMD7, ENO1, CDC20, UBE2C, YWHAE, FLNA, PSMA2, MAD2L1, PSMC4, ID1, PSMA5, BACE2, PSMC2, PSMA4, PSMA3, PSMC1, HES2, YWHAQ, UBC, UBB, IGFBP3	468	734	13528	1.77217	0.482482	0.00923471	0.435207
GOTERM_BP_FAT	GO:0030155~regulation of cell adhesion	15	2.6362	0.00027451	ICAM1, TNF, IL8, ATP5B, IL18, L1CAM, FXYD5, TPM1, TGFB2, SIRPG, SAA2, TGFBI, THBS1, ADAM9, CYR61	468	137	13528	3.16489	0.52166	0.0101899	0.487092
GOTERM_BP_FAT	GO:0034621~cellular macromolecular complex subunit organization	27	4.74517	0.000280128	EIF6, CAV2, CAV1, TUBB2B, TUBB2A, FKBP4, DSTN, NDUFS5, SET, PICALM, NPM1, H2AFZ, HSPA4, TUBA1B, TUBA1C, TCP1, HSP90AA1, DDX1, ETF1, SF3A1, FLNA, SF3A3, PSMG1, PTRF, SNRPB, H3F3B, SNRPE	468	357	13528	2.18617	0.528827	0.0102557	0.497038
GOTERM_BP_FAT	GO:0042127~regulation of cell proliferation	47	8.26011	0.000310255	CAV2, CNBP, S100A6, CAV1, KRT6A, RARRES1, CCL2, TNF, IFITM1, IL18, EDN1, EGLN3, MMP7, NFKBIA, KITLG, EIF5A, JAG1, TIMP2, ITGB1, PNP, CXCL10, TGFB2, TIMP1, LIF, RPA1, KRT5, NPM1, LAMB1, THBS1, FOSL1, EGFR, IL8, ANXA1, SOD2, TNS3, NME2, SIRPG, CDKN1A, CCND1, HIF1A, ETS1, EEF1E1, F3, BTG3, PLA2G2A, CFDP1, IGFBP3	468	787	13528	1.72628	0.565463	0.0112	0.550353
GOTERM_BP_FAT	GO:0030036~actin cytoskeleton organization	20	3.51494	0.000318934	ALDOA, PLEK2, CNN3, FSCN1, FERMT2, ACTN1, TMSB10, ARPC5, ITGB1, TPM1, FLNA, DSTN, ACTG1, PFN1, DYNLL1, CFL1, RHOA, CNN2, CAP1, PLS3	468	226	13528	2.55805	0.575479	0.0113589	0.565709
GOTERM_BP_FAT	GO:0007159~leukocyte adhesion	7	1.23023	0.000323169	ICAM1, TNF, OLR1, ITGA5, L1CAM, MSN, ITGB1	468	28	13528	7.2265	0.580282	0.0113583	0.5732
GOTERM_BP_FAT	GO:0048870~cell motility	24	4.21793	0.000419571	CAV2, ICAM1, TNF, CCL2, IL8, FUT8, TNFRSF12A, ATP5B, KITLG, ITGB1, YWHAE, TGFB2, TNS3, HIF1A, SAA2, ID1, ITGA5, ETS1, CXCL16, CFL1, DNAJA1, CAP1, MSN, THBS1	468	307	13528	2.25975	0.676062	0.0145324	0.743585
GOTERM_BP_FAT	GO:0051674~localization of cell	24	4.21793	0.000419571	CAV2, ICAM1, TNF, CCL2, IL8, FUT8, TNFRSF12A, ATP5B, KITLG, ITGB1, YWHAE, TGFB2, TNS3, HIF1A, SAA2, ID1, ITGA5, ETS1, CXCL16, CFL1, DNAJA1, CAP1, MSN, THBS1	468	307	13528	2.25975	0.676062	0.0145324	0.743585
GOTERM_BP_FAT	GO:0006915~apoptosis	38	6.67838	0.000482506	RTN4, TNFRSF21, TNF, MCL1, TNFRSF12A, EGLN3, NFKBIA, BNIP3, PEA15, DAPL1, ATG5, DYNLL1, SQSTM1, KRT8, PYCARD, AATF, HSPE1, THBS1, API5, CIB1, LGALS1, BIRC3, SOD1, YWHAE, BIRC2, SOD2, VDAC1, PLEKHF1, TNFSF10, PDCL3, KRT18, VCP, F3, UBC, UBB, TNFAIP3, PDCD5, GADD45A	468	602	13528	1.82463	0.726464	0.0164822	0.85467
GOTERM_BP_FAT	GO:0032570~response to progesterone stimulus	6	1.05448	0.000483904	CAV1, CCL2, SOCS3, THBS1, FOSL1, TGFB2	468	20	13528	8.67179	0.72749	0.0163221	0.857137
GOTERM_BP_FAT	GO:0042493~response to drug	19	3.33919	0.000505706	CAV2, CAV1, YWHAZ, CCL2, SOCS3, CDH3, SOD1, UQCRFS1, PNP, SOD2, CCND1, CDKN1A, NME2, SLC1A3, CA9, ATG5, CSAG3, FOSL1, PDZK1	468	216	13528	2.54266	0.742997	0.01684	0.89559
GOTERM_BP_FAT	GO:0051130~positive regulation of cellular component organization	17	2.9877	0.000539494	CAV2, CAV1, TNF, TNFRSF12A, C3, EDN1, EIF5A, CD63, TPM1, DSTN, TGFB2, SUMO1, NPM1, CFL1, RHOA, ADAM9, SYNPO	468	181	13528	2.71493	0.765306	0.0177356	0.955159
GOTERM_BP_FAT	GO:0007398~ectoderm development	18	3.16344	0.000542658	KRT6A, KRT6B, CRABP2, UGCG, ANXA1, KRT10, JAG1, KRT34, TGFB2, FOXQ1, LAMB3, CST6, ATP2A2, KRT5, KRT17, LAMC2, IVL, ADAM9	468	199	13528	2.61461	0.767293	0.017623	0.960734
GOTERM_BP_FAT	GO:0016477~cell migration	22	3.86643	0.000603076	CAV2, ICAM1, TNF, CCL2, IL8, FUT8, TNFRSF12A, ATP5B, KITLG, ITGB1, YWHAE, TGFB2, TNS3, HIF1A, SAA2, ID1, ITGA5, CXCL16, CFL1, CAP1, MSN, THBS1	468	276	13528	2.3041	0.802171	0.019333	1.06716
GOTERM_BP_FAT	GO:0010033~response to organic substance	43	7.55712	0.000618101	HSP90AB1, CAV2, ATP6V0E1, CAV1, CCL2, TNF, MCL1, NFKBIA, HSPA1A, UQCRFS1, HPRT1, TGFB2, HSPH1, DNAJA1, HSPA4, HSPE1, SERPINA1, THBS1, GNG5, FOSL1, HSPA8, MB, ADAM9, CYR61, EGFR, HSP90AA1, SOCS3, ADIPOR1, CLIC1, ANXA5, SOD1, BIRC2, NME2, CDKN1A, CCND1, VCP, CA9, ID1, GNB1, CXCL16, CFL1, HSPB1, NFE2L2	468	721	13528	1.72394	0.81	0.0195765	1.09361
GOTERM_BP_FAT	GO:0012501~programmed cell death	38	6.67838	0.000645628	RTN4, TNFRSF21, TNF, MCL1, TNFRSF12A, EGLN3, NFKBIA, BNIP3, PEA15, DAPL1, ATG5, DYNLL1, SQSTM1, KRT8, PYCARD, AATF, HSPE1, THBS1, API5, CIB1, LGALS1, BIRC3, SOD1, YWHAE, BIRC2, SOD2, VDAC1, PLEKHF1, TNFSF10, PDCL3, KRT18, VCP, F3, UBC, UBB, TNFAIP3, PDCD5, GADD45A	468	611	13528	1.79775	0.82355	0.0202016	1.14205
GOTERM_BP_FAT	GO:0034622~cellular macromolecular complex assembly	24	4.21793	0.000685399	EIF6, CAV2, CAV1, TCP1, HSP90AA1, TUBB2B, TUBB2A, FKBP4, DDX1, SF3A1, FLNA, SF3A3, PSMG1, NDUFS5, PICALM, SET, NPM1, SNRPB, H2AFZ, H3F3B, HSPA4, TUBA1B, SNRPE, TUBA1C	468	318	13528	2.18158	0.841439	0.0211865	1.212
GOTERM_BP_FAT	GO:0030029~actin filament-based process	20	3.51494	0.00070649	ALDOA, PLEK2, CNN3, FSCN1, FERMT2, ACTN1, TMSB10, ARPC5, ITGB1, TPM1, FLNA, DSTN, ACTG1, PFN1, DYNLL1, CFL1, RHOA, CNN2, CAP1, PLS3	468	241	13528	2.39884	0.850177	0.0215833	1.24907
GOTERM_BP_FAT	GO:0010035~response to inorganic substance	18	3.16344	0.000758244	EGFR, ACTB, CAV1, OLR1, SOD1, TPM1, SOD2, ACTG1, CCND1, CDKN1A, SLC1A3, PRDX6, SERPINA1, THBS1, FOSL1, CALM2, MB, ADAM9	468	205	13528	2.53809	0.869635	0.0228865	1.33999
GOTERM_BP_FAT	GO:0051495~positive regulation of cytoskeleton organization	8	1.40598	0.000812888	CAV2, CAV1, EDN1, CFL1, RHOA, TPM1, DSTN, SYNPO	468	45	13528	5.13884	0.887444	0.024244	1.4359
GOTERM_BP_FAT	GO:0006006~glucose metabolic process	15	2.6362	0.000841351	ALDOA, LDHB, LDHA, TNF, PGAM1, PFKP, BPGM, GPI, TPI1, PYGL, PGM1, PGK1, GAPDH, ENO1, MDH1	468	153	13528	2.83392	0.895735	0.0248073	1.48582
GOTERM_BP_FAT	GO:0050806~positive regulation of synaptic transmission	7	1.23023	0.000968204	EGFR, SLC1A3, TNF, CCL2, UBC, PINK1, UBB	468	34	13528	5.95123	0.925864	0.0281869	1.70803
GOTERM_BP_FAT	GO:0045785~positive regulation of cell adhesion	9	1.58172	0.00100422	SIRPG, TNF, SAA2, L1CAM, THBS1, TPM1, ADAM9, CYR61, TGFB2	468	60	13528	4.3359	0.932706	0.0289074	1.77102
GOTERM_BP_FAT	GO:0019318~hexose metabolic process	17	2.9877	0.00102148	ALDOA, LDHB, LDHA, TNF, FUT8, PGAM1, PFKP, BPGM, GPI, TPI1, PYGL, PGM1, GFPT2, PGK1, GAPDH, ENO1, MDH1	468	192	13528	2.55938	0.935758	0.0290858	1.80121
GOTERM_BP_FAT	GO:0048514~blood vessel morphogenesis	18	3.16344	0.00104502	RTN4, CAV1, IL8, TNFRSF12A, ATP5B, IL18, EDN1, JAG1, NCL, ANXA2, TGFB2, GPI, HIF1A, ATG5, ID1, THBS1, TNFAIP2, CYR61	468	211	13528	2.46591	0.939697	0.0294345	1.84235
GOTERM_BP_FAT	GO:0051971~positive regulation of transmission of nerve impulse	7	1.23023	0.00153363	EGFR, SLC1A3, TNF, CCL2, UBC, PINK1, UBB	468	37	13528	5.4687	0.983796	0.0424665	2.69273
GOTERM_BP_FAT	GO:0043933~macromolecular complex subunit organization	41	7.20562	0.00155955	EIF6, CAV2, CAV1, TUBB2B, TUBB2A, POLR2K, FKBP4, HPRT1, DSTN, NDUFS5, SET, PICALM, C1QTNF1, NPM1, H2AFZ, CDA, HSPA4, TUBA1B, TUBA1C, TCP1, HSP90AA1, DARS, DDX1, PFKP, ANXA5, BIRC3, ETF1, SF3A1, BIRC2, FLNA, SF3A3, SOD2, PPIH, PSMG1, PTRF, VCP, SNRPB, PLA2G2A, H3F3B, VAMP3, SNRPE	468	710	13528	1.66922	0.984887	0.0427292	2.73765
GOTERM_BP_FAT	GO:0019725~cellular homeostasis	30	5.27241	0.0016127	GLRX3, ALDOA, SRI, ATP6V0E1, CAV1, CCL2, MCL1, ATP5B, EDN1, F2RL1, BNIP3, APLP2, CKB, ANXA7, SAA2, NPM1, TPT1, FTL, KLK6, MAL, SOD1, SOD2, HIF1A, ATP2A2, PRDX6, GNB1, TXNDC5, TXN, CLDN1, SH3BGRL3	468	466	13528	1.8609	0.986901	0.0437089	2.8297
GOTERM_BP_FAT	GO:0031100~organ regeneration	6	1.05448	0.00173077	LIF, CDKN1A, CCND1, CCL2, SOCS3, GAS6	468	26	13528	6.67061	0.990466	0.0463689	3.03387
GOTERM_BP_FAT	GO:0008544~epidermis development	16	2.81195	0.00180514	UGCG, CRABP2, ANXA1, KRT10, JAG1, KRT34, TGFB2, FOXQ1, LAMB3, CST6, ATP2A2, KRT5, KRT17, LAMC2, IVL, ADAM9	468	184	13528	2.51356	0.992195	0.0478379	3.16226
GOTERM_BP_FAT	GO:0031646~positive regulation of neurological system process	7	1.23023	0.00203075	EGFR, SLC1A3, TNF, CCL2, UBC, PINK1, UBB	468	39	13528	5.18825	0.995747	0.0531374	3.55078
GOTERM_BP_FAT	GO:0051240~positive regulation of multicellular organismal process	19	3.33919	0.0020415	EGFR, CAV1, CCL2, TNF, IL27RA, IL18, EDN1, PINK1, SOD1, TPM1, TGFB2, HIF1A, SLC1A3, SAA2, F3, UBC, PYCARD, UBB, THBS1	468	244	13528	2.25088	0.995868	0.0528968	3.56926
GOTERM_BP_FAT	GO:0001568~blood vessel development	19	3.33919	0.00211413	RTN4, CAV1, IL8, TNFRSF12A, ATP5B, IL18, EDN1, JAG1, NCL, ANXA2, TGFB2, GPI, HIF1A, ATG5, ID1, ITGAV, THBS1, TNFAIP2, CYR61	468	245	13528	2.24169	0.996602	0.0542065	3.694
GOTERM_BP_FAT	GO:0006508~proteolysis	55	9.66608	0.0021537	MMP7, ISG15, PSMD2, PSMD4, KLK10, PSMD7, USP14, ADAM9, SOCS3, ENC1, UBE2C, PSMA2, MAD2L1, PSMA5, BACE2, PSMA4, F3, PSMA3, UBC, DDB2, CTSB, UBB, TNFAIP3, UBE2S, NEURL3, PREP, C3, ANAPC13, UBE2V1, PSMA7, FEM1A, PSMB4, SUMO1, PSMB7, PSMB6, PSMB1, SQSTM1, PSMB3, CACYBP, PYCARD, KLK6, CPA4, OLR1, FBXO2, UBE2L6, CDC20, CAPN2, SUGT1, UBE2L3, UBL5, PSMC4, VCP, UBA2, PSMC2, PSMC1	468	1054	13528	1.50838	0.996945	0.0546726	3.76189
GOTERM_BP_FAT	GO:0007155~cell adhesion	40	7.02988	0.00219483	CCL2, TNF, TNFRSF12A, TNC, FERMT2, KITLG, C22ORF28, BCAM, L1CAM, IL32, CDH3, ITGB1, VCL, LAMB3, ITGAV, TGFBI, RHOA, AATF, ZYX, MSN, LAMB1, THBS1, LOXL2, ADAM9, CIB1, CYR61, EGFR, ICAM1, OLR1, ACTN1, ITGA3, AMIGO2, NME2, SIRPG, ATP2A2, ITGA5, GPR56, CLDN1, CFDP1, LAMC2	468	700	13528	1.65177	0.997265	0.0551679	3.83243
GOTERM_BP_FAT	GO:0010638~positive regulation of organelle organization	10	1.75747	0.00220124	CAV2, CAV1, TNF, NPM1, EDN1, CFL1, RHOA, TPM1, DSTN, SYNPO	468	83	13528	3.48265	0.997312	0.0548124	3.84341
GOTERM_BP_FAT	GO:0022610~biological adhesion	40	7.02988	0.00220351	CCL2, TNF, TNFRSF12A, TNC, FERMT2, KITLG, C22ORF28, BCAM, L1CAM, IL32, CDH3, ITGB1, VCL, LAMB3, ITGAV, TGFBI, RHOA, AATF, ZYX, MSN, LAMB1, THBS1, LOXL2, ADAM9, CIB1, CYR61, EGFR, ICAM1, OLR1, ACTN1, ITGA3, AMIGO2, NME2, SIRPG, ATP2A2, ITGA5, GPR56, CLDN1, CFDP1, LAMC2	468	701	13528	1.64941	0.997329	0.0543641	3.8473
GOTERM_BP_FAT	GO:0008284~positive regulation of cell proliferation	27	4.74517	0.00244098	KRT6A, S100A6, CNBP, TNF, CCL2, IL18, EDN1, EIF5A, KITLG, ITGB1, PNP, TIMP1, TGFB2, CXCL10, LIF, RPA1, NPM1, LAMB1, FOSL1, EGFR, TNS3, NME2, CDKN1A, CCND1, SIRPG, HIF1A, F3	468	414	13528	1.88517	0.99859	0.0595063	4.25348
GOTERM_BP_FAT	GO:0010627~regulation of protein kinase cascade	19	3.33919	0.0025481	CAV1, TNF, LGALS1, EDN1, UBE2V1, PKN1, WLS, TIMP2, BIRC2, FLNA, TGFB2, LIF, IKBKE, TNFSF10, SQSTM1, F3, RHOA, TNFAIP3, IL22RA2	468	249	13528	2.20568	0.998944	0.0614819	4.43617
GOTERM_BP_FAT	GO:0050818~regulation of coagulation	7	1.23023	0.00264083	CAV1, F3, EDN1, F2RL1, ANXA5, THBS1, ANXA2	468	41	13528	4.93517	0.999177	0.0630843	4.59405
GOTERM_BP_FAT	GO:0051592~response to calcium ion	8	1.40598	0.00270395	EGFR, ACTG1, ACTB, CAV1, CCND1, THBS1, CALM2, ADAM9	468	55	13528	4.20451	0.999306	0.0639767	4.70137
GOTERM_BP_FAT	GO:0001944~vasculature development	19	3.33919	0.002775	RTN4, CAV1, IL8, TNFRSF12A, ATP5B, IL18, EDN1, JAG1, NCL, ANXA2, TGFB2, GPI, HIF1A, ATG5, ID1, ITGAV, THBS1, TNFAIP2, CYR61	468	251	13528	2.1881	0.999427	0.0650322	4.82205
GOTERM_BP_FAT	GO:0065003~macromolecular complex assembly	38	6.67838	0.00285426	EIF6, CAV2, CAV1, TUBB2B, TUBB2A, POLR2K, FKBP4, HPRT1, NDUFS5, SET, PICALM, C1QTNF1, NPM1, H2AFZ, CDA, HSPA4, TUBA1B, TUBA1C, TCP1, HSP90AA1, DARS, DDX1, PFKP, ANXA5, BIRC3, SF3A1, BIRC2, FLNA, SF3A3, SOD2, PPIH, PSMG1, PTRF, VCP, SNRPB, H3F3B, VAMP3, SNRPE	468	665	13528	1.65177	0.999537	0.0662524	4.9565
GOTERM_BP_FAT	GO:0009408~response to heat	8	1.40598	0.0030004	MICB, CCL2, SOCS3, HSPB1, HSPA4, SOD1, THBS1, MYOF	468	56	13528	4.12943	0.999688	0.0689353	5.20394
GOTERM_BP_FAT	GO:0009967~positive regulation of signal transduction	21	3.69069	0.00318475	KLK6, CAV2, CAV1, TNF, LGALS1, UBE2V1, L1CAM, WLS, JAG1, BIRC2, FLNA, TGFB2, LIF, IKBKE, TNFSF10, HIF1A, F3, LANCL2, EEF1E1, RHOA, THBS1	468	295	13528	2.05771	0.99981	0.0724021	5.51519
GOTERM_BP_FAT	GO:0010604~positive regulation of macromolecule metabolic process	46	8.08436	0.00321079	CNBP, CAV1, TNF, MORF4L2, XRCC6, NFKBIA, KITLG, EIF5A, PSMA7, CBFB, TGFB2, LIF, PSMB4, PSMB7, MRPL12, PSMB6, PSMB1, SQSTM1, PSMB3, PSMD2, AATF, PSMD4, THBS1, FOSL1, PSMD7, ADAM9, CEBPB, RAN, CDC20, UBE2C, PSMA2, CCND1, HIF1A, YWHAH, PSMC4, ILF2, PSMA5, ETS1, NCOA4, PSMC2, PSMA4, PSMA3, PSMC1, UBC, NFE2L2, UBB	468	857	13528	1.55155	0.999823	0.0723619	5.55909
GOTERM_BP_FAT	GO:0050900~leukocyte migration	8	1.40598	0.00332109	ICAM1, TNF, CCL2, SAA2, IL8, CXCL16, MSN, TGFB2	468	57	13528	4.05698	0.999868	0.0741365	5.74478
GOTERM_BP_FAT	GO:0016044~membrane organization	25	4.39367	0.00339301	EGFR, RAB7A, CAV2, CAV1, CLTA, HSP90AA1, GNAI3, ATP5B, BNIP3, MAL, LPCAT2, SOD1, NME2, PICALM, FOLR1, CXCL16, ITGAV, TXNDC5, ARCN1, HSPA4, VAMP3, CAP1, THBS1, HSPA8, FTL	468	381	13528	1.89672	0.999892	0.0750602	5.86565
GOTERM_BP_FAT	GO:0051094~positive regulation of developmental process	20	3.51494	0.00365518	TNF, TNFRSF12A, SOCS3, MORF4L2, XRCC6, KITLG, JAG1, IL7R, PNP, TGFB2, LIF, NME2, HIF1A, ETS1, F3, RHOA, PLA2G2A, THBS1, IGFBP3, ADAM9	468	278	13528	2.07957	0.999946	0.0799748	6.3051
GOTERM_BP_FAT	GO:0044087~regulation of cellular component biogenesis	13	2.28471	0.00374695	CAV2, CAV1, EDN1, TMSB10, ARPC5, TPM1, SUMO1, RHOA, UBC, UBB, MAPRE1, THBS1, SYNPO	468	142	13528	2.64632	0.999958	0.0812423	6.45847
GOTERM_BP_FAT	GO:0043122~regulation of I-kappaB kinase/NF-kappaB cascade	11	1.93322	0.00385838	IKBKE, TNFSF10, TNF, SQSTM1, LGALS1, RHOA, UBE2V1, WLS, TNFAIP3, BIRC2, FLNA	468	107	13528	2.97164	0.999969	0.0828924	6.64437
GOTERM_BP_FAT	GO:0043623~cellular protein complex assembly	14	2.46046	0.00406846	CAV2, CAV1, TCP1, HSP90AA1, TUBB2B, TUBB2A, FKBP4, FLNA, NDUFS5, PSMG1, PICALM, HSPA4, TUBA1B, TUBA1C	468	162	13528	2.49805	0.999982	0.0865233	6.99391
GOTERM_BP_FAT	GO:0033209~tumor necrosis factor-mediated signaling pathway	4	0.702988	0.00409168	KRT18, TNF, KRT8, PYCARD	468	10	13528	11.5624	0.999984	0.0863145	7.03246
GOTERM_BP_FAT	GO:0005996~monosaccharide metabolic process	17	2.9877	0.00443722	ALDOA, LDHB, LDHA, TNF, FUT8, PGAM1, PFKP, BPGM, GPI, TPI1, PYGL, PGM1, GFPT2, PGK1, GAPDH, ENO1, MDH1	468	222	13528	2.21352	0.999994	0.0925466	7.60447
GOTERM_BP_FAT	GO:0006970~response to osmotic stress	6	1.05448	0.00447083	EGFR, ANXA7, TNF, SLC2A1, PKN1, KMO	468	32	13528	5.41987	0.999994	0.0924994	7.65993
GOTERM_BP_FAT	GO:0001936~regulation of endothelial cell proliferation	6	1.05448	0.00447083	CAV2, CAV1, HIF1A, CCL2, F3, THBS1	468	32	13528	5.41987	0.999994	0.0924994	7.65993
GOTERM_BP_FAT	GO:0009628~response to abiotic stimulus	24	4.21793	0.00450856	EGFR, CAV1, MICB, TNF, CCL2, SOCS3, IL18, XRCC6, PKN1, KMO, SOD1, SOD2, ANXA7, CCND1, CDKN1A, SLC1A3, SLC2A1, DDB2, HSPB1, HSPA4, THBS1, MYOF, FOSL1, IVL	468	368	13528	1.88517	0.999995	0.0925339	7.72216
GOTERM_BP_FAT	GO:0031589~cell-substrate adhesion	10	1.75747	0.00670589	TNFRSF12A, ITGAV, RHOA, ACTN1, C22ORF28, BCAM, ITGA3, LAMB1, ITGB1, ADAM9	468	98	13528	2.94959	1	0.133622	11.2783
GOTERM_BP_FAT	GO:0042592~homeostatic process	40	7.02988	0.00708019	PTGES3, SRI, GLRX3, ALDOA, ATP6V0E1, CAV1, CCL2, MCL1, ATP5B, XRCC6, EDN1, F2RL1, BNIP3, IL7R, APLP2, CKB, TIMP1, RPA1, ANXA7, SAA2, NPM1, TPT1, SERPINA3, MB, FH, FTL, KLK6, MAL, BPGM, SOD1, SOD2, HIF1A, ATP2A2, PRDX6, GNB1, PYGL, TXNDC5, TXN, CLDN1, SH3BGRL3	468	751	13528	1.5396	1	0.139529	11.8711
GOTERM_BP_FAT	GO:0046907~intracellular transport	36	6.32689	0.00717469	YWHAZ, CLTA, TNF, CHMP5, TIMM17A, NFKBIA, EIF5A, BNIP3, SDCBP2, TPM1, TGFB2, AP2B1, SET, SLC1A3, SQSTM1, NPM1, HSPA8, FTL, GABARAPL2, HSP90AA1, RAN, OPTN, YWHAE, FLNA, PPIH, KRT18, YWHAH, ATP2A2, VCP, TXNDC5, ARCN1, YWHAQ, PTTG1IP, TOMM20, KPNA2, SEC61G	468	657	13528	1.58389	1	0.140238	12.0201
GOTERM_BP_FAT	GO:0009205~purine ribonucleoside triphosphate metabolic process	11	1.93322	0.00723137	ALDOA, ATP1B1, NME2, ATP6V0E1, ATP2A2, ATP5B, ATP6V1E1, ATP5C1, OLA1, ACLY, ATP6V0D2	468	117	13528	2.71766	1	0.140252	12.1094
GOTERM_BP_FAT	GO:0051493~regulation of cytoskeleton organization	12	2.10896	0.00746754	CAV2, CAV1, NPM1, EDN1, CFL1, RHOA, TMSB10, ARPC5, MAPRE1, TPM1, DSTN, SYNPO	468	136	13528	2.55053	1	0.143473	12.4805
GOTERM_BP_FAT	GO:0030193~regulation of blood coagulation	6	1.05448	0.00747769	CAV1, F3, EDN1, F2RL1, THBS1, ANXA2	468	36	13528	4.81766	1	0.14264	12.4964
GOTERM_BP_FAT	GO:0009199~ribonucleoside triphosphate metabolic process	11	1.93322	0.00766532	ALDOA, ATP1B1, NME2, ATP6V0E1, ATP2A2, ATP5B, ATP6V1E1, ATP5C1, OLA1, ACLY, ATP6V0D2	468	118	13528	2.69463	1	0.144936	12.7902
GOTERM_BP_FAT	GO:0009266~response to temperature stimulus	9	1.58172	0.00778844	MICB, CCL2, SOCS3, IL18, HSPB1, HSPA4, SOD1, THBS1, MYOF	468	83	13528	3.13438	1	0.146071	12.9824
GOTERM_BP_FAT	GO:0034613~cellular protein localization	25	4.39367	0.00864699	EGFR, CLTA, YWHAZ, TNF, RAN, TIMM17A, NFKBIA, EIF5A, OPTN, YWHAE, FLNA, TGFB2, PPIH, AP2B1, YWHAH, KRT18, VCP, ID1, NPM1, ARCN1, PTTG1IP, YWHAQ, TOMM20, KPNA2, SEC61G	468	411	13528	1.75827	1	0.159771	14.3118
GOTERM_BP_FAT	GO:0006955~immune response	37	6.50264	0.00896183	MICB, YWHAZ, TNF, CCL2, IL27RA, C3, IFITM2, IL18, SUSD2, BNIP3, CD70, IL32, NFKB2, IL7R, PNP, CXCL10, LIF, SQSTM1, THBS1, ICAM1, CEBPB, IL8, OLR1, RELB, HLA-B, PRELID1, GPI, IKBKE, TNFSF10, ILF2, ETS1, CXCL16, ULBP2, POMP, SERPINB4, PTMS, GBP1	468	690	13528	1.55003	1	0.163987	14.7945
GOTERM_BP_FAT	GO:0042692~muscle cell differentiation	11	1.93322	0.00908842	ACTG1, CAST, CAV2, WNT4, ATG5, TNC, LGALS1, JAG1, CAPN2, TPM1, ITGB1	468	121	13528	2.62782	1	0.164995	14.9879
GOTERM_BP_FAT	GO:0051101~regulation of DNA binding	11	1.93322	0.00908842	ICAM1, SUMO1, NME2, TNF, ID1, NPM1, PYCARD, UBE2V1, NFKBIA, CALM2, FLNA	468	121	13528	2.62782	1	0.164995	14.9879
GOTERM_BP_FAT	GO:0070727~cellular macromolecule localization	25	4.39367	0.00929056	EGFR, CLTA, YWHAZ, TNF, RAN, TIMM17A, NFKBIA, EIF5A, OPTN, YWHAE, FLNA, TGFB2, PPIH, AP2B1, YWHAH, KRT18, VCP, ID1, NPM1, ARCN1, PTTG1IP, YWHAQ, TOMM20, KPNA2, SEC61G	468	414	13528	1.74553	1	0.167232	15.2958
GOTERM_BP_FAT	GO:0070271~protein complex biogenesis	29	5.09666	0.00932902	CAV2, CAV1, TUBB2B, POLR2K, TUBB2A, FKBP4, HPRT1, NDUFS5, PICALM, C1QTNF1, NPM1, CDA, HSPA4, TUBA1B, TUBA1C, TCP1, HSP90AA1, DARS, PFKP, ANXA5, BIRC3, BIRC2, FLNA, SOD2, PPIH, PSMG1, PTRF, VCP, VAMP3	468	505	13528	1.65995	1	0.166757	15.3543
GOTERM_BP_FAT	GO:0006461~protein complex assembly	29	5.09666	0.00932902	CAV2, CAV1, TUBB2B, POLR2K, TUBB2A, FKBP4, HPRT1, NDUFS5, PICALM, C1QTNF1, NPM1, CDA, HSPA4, TUBA1B, TUBA1C, TCP1, HSP90AA1, DARS, PFKP, ANXA5, BIRC3, BIRC2, FLNA, SOD2, PPIH, PSMG1, PTRF, VCP, VAMP3	468	505	13528	1.65995	1	0.166757	15.3543
GOTERM_BP_FAT	GO:0009611~response to wounding	30	5.27241	0.0095124	YWHAZ, TNF, CCL2, C3, SAA3P, TNC, F2RL1, CDH3, TPM1, CXCL10, TGFB2, SLC1A3, SAA2, SERPINA3, SERPINA1, THBS1, KLK6, CEBPB, OLR1, IL8, ANXA1, ANXA5, SOD1, SOD2, HIF1A, ITGA5, F3, SERPINB2, ANXA8L2, CTSB	468	530	13528	1.63619	1	0.168642	15.6325
GOTERM_BP_FAT	GO:0009144~purine nucleoside triphosphate metabolic process	11	1.93322	0.00960512	ALDOA, ATP1B1, NME2, ATP6V0E1, ATP2A2, ATP5B, ATP6V1E1, ATP5C1, OLA1, ACLY, ATP6V0D2	468	122	13528	2.60628	1	0.169039	15.7728
GOTERM_BP_FAT	GO:0019674~NAD metabolic process	5	0.878735	0.00997077	LDHB, IDH3B, KMO, PNP, MDH1	468	25	13528	5.7812	1	0.173779	16.3242
GOTERM_BP_FAT	GO:0045637~regulation of myeloid cell differentiation	8	1.40598	0.0102815	LIF, NME2, HIF1A, TNF, ETS1, NFKBIA, KITLG, JAG1	468	70	13528	3.30354	1	0.177565	16.79
GOTERM_BP_FAT	GO:0046034~ATP metabolic process	10	1.75747	0.0103805	ALDOA, ATP1B1, ATP6V0E1, ATP2A2, ATP5B, ATP6V1E1, ATP5C1, OLA1, ACLY, ATP6V0D2	468	105	13528	2.75295	1	0.177986	16.9379
GOTERM_BP_FAT	GO:0051050~positive regulation of transport	16	2.81195	0.0104687	CAV1, TNF, C3, GLUD1, EDN1, NFKBIA, PINK1, CD63, FLNA, TGFB2, SAA2, RHOA, PYCARD, PDZK1, CALM2, ADAM9	468	223	13528	2.07397	1	0.178234	17.0695
GOTERM_BP_FAT	GO:0045069~regulation of viral genome replication	4	0.702988	0.0112	TNF, IL8, PPIA, TNIP1	468	14	13528	8.25885	1	0.188314	18.1528
GOTERM_BP_FAT	GO:0006979~response to oxidative stress	13	2.28471	0.011473	EGFR, MICB, OLR1, PDLIM1, SOD1, TPM1, SOD2, HIF1A, PRDX6, FOSL1, SRXN1, MB, ADAM9	468	164	13528	2.29133	1	0.191271	18.5537
GOTERM_BP_FAT	GO:0046496~nicotinamide nucleotide metabolic process	6	1.05448	0.0116658	LDHB, TPI1, IDH3B, KMO, PNP, MDH1	468	40	13528	4.3359	1	0.192983	18.8357
GOTERM_BP_FAT	GO:0006769~nicotinamide metabolic process	6	1.05448	0.0116658	LDHB, TPI1, IDH3B, KMO, PNP, MDH1	468	40	13528	4.3359	1	0.192983	18.8357
GOTERM_BP_FAT	GO:0007015~actin filament organization	8	1.40598	0.0119173	ALDOA, CFL1, FSCN1, RHOA, ACTN1, PLS3, FLNA, DSTN	468	72	13528	3.21178	1	0.195538	19.2023
GOTERM_BP_FAT	GO:0042542~response to hydrogen peroxide	7	1.23023	0.0123722	OLR1, PRDX6, SOD1, FOSL1, SOD2, ADAM9, MB	468	56	13528	3.61325	1	0.201022	19.8613
GOTERM_BP_FAT	GO:0043603~cellular amide metabolic process	7	1.23023	0.0123722	LDHB, TPI1, ASS1, IDH3B, KMO, PNP, MDH1	468	56	13528	3.61325	1	0.201022	19.8613
GOTERM_BP_FAT	GO:0033365~protein localization in organelle	12	2.10896	0.012377	PPIH, YWHAZ, TNF, RAN, TIMM17A, PTTG1IP, TOMM20, NFKBIA, OPTN, KPNA2, SEC61G, TGFB2	468	146	13528	2.37583	1	0.199897	19.8684
GOTERM_BP_FAT	GO:0006575~cellular amino acid derivative metabolic process	13	2.28471	0.0125458	PADI3, EIF5A, KMO, HPRT1, SOD1, LPCAT2, SOD2, TGFB2, CKB, CKMT1A, SLC1A3, GLO1, SMS	468	166	13528	2.26372	1	0.201147	20.1116
GOTERM_BP_FAT	GO:0009820~alkaloid metabolic process	6	1.05448	0.0129192	LDHB, TPI1, IDH3B, KMO, PNP, MDH1	468	41	13528	4.23014	1	0.205295	20.6471
GOTERM_BP_FAT	GO:0045597~positive regulation of cell differentiation	16	2.81195	0.0132849	TNFRSF12A, SOCS3, MORF4L2, XRCC6, KITLG, JAG1, IL7R, PNP, TGFB2, LIF, NME2, HIF1A, ETS1, RHOA, PLA2G2A, IGFBP3	468	229	13528	2.01963	1	0.209261	21.1684
GOTERM_BP_FAT	GO:0019362~pyridine nucleotide metabolic process	6	1.05448	0.0142606	LDHB, TPI1, IDH3B, KMO, PNP, MDH1	468	42	13528	4.12943	1	0.221602	22.5433
GOTERM_BP_FAT	GO:0000302~response to reactive oxygen species	8	1.40598	0.0147118	OLR1, PRDX6, SOD1, TPM1, FOSL1, SOD2, ADAM9, MB	468	75	13528	3.0833	1	0.226504	23.1714
GOTERM_BP_FAT	GO:0031032~actomyosin structure organization	5	0.878735	0.0148813	ACTG1, CNN3, CNN2, TPM1, ITGB1	468	28	13528	5.16178	1	0.227522	23.4062
GOTERM_BP_FAT	GO:0009141~nucleoside triphosphate metabolic process	11	1.93322	0.0153216	ALDOA, ATP1B1, NME2, ATP6V0E1, ATP2A2, ATP5B, ATP6V1E1, ATP5C1, OLA1, ACLY, ATP6V0D2	468	131	13528	2.42722	1	0.232146	24.0127
GOTERM_BP_FAT	GO:0033483~gas homeostasis	3	0.527241	0.0162651	CAV1, HIF1A, SOD2	468	6	13528	14.453	1	0.243294	25.2973
GOTERM_BP_FAT	GO:0000398~nuclear mRNA splicing, via spliceosome	12	2.10896	0.0170592	POLR2K, PCBP1, MAGOH, SNRPB2, HNRNPA2B1, DDX1, SNRPB, HNRNPC, SF3A1, SNRPE, YBX1, SF3A3	468	153	13528	2.26714	1	0.252237	26.3625
GOTERM_BP_FAT	GO:0006732~coenzyme metabolic process	12	2.10896	0.0170592	LDHB, TPI1, FOLR1, IDH3B, ACLY, GLO1, KMO, SOD1, PNP, FH, SOD2, MDH1	468	153	13528	2.26714	1	0.252237	26.3625
GOTERM_BP_FAT	GO:0000377~RNA splicing, via transesterification reactions with bulged adenosine as nucleophile	12	2.10896	0.0170592	POLR2K, PCBP1, MAGOH, SNRPB2, HNRNPA2B1, DDX1, SNRPB, HNRNPC, SF3A1, SNRPE, YBX1, SF3A3	468	153	13528	2.26714	1	0.252237	26.3625
GOTERM_BP_FAT	GO:0000375~RNA splicing, via transesterification reactions	12	2.10896	0.0170592	POLR2K, PCBP1, MAGOH, SNRPB2, HNRNPA2B1, DDX1, SNRPB, HNRNPC, SF3A1, SNRPE, YBX1, SF3A3	468	153	13528	2.26714	1	0.252237	26.3625
GOTERM_BP_FAT	GO:0006605~protein targeting	15	2.6362	0.0171607	YWHAZ, TNF, RAN, TIMM17A, EIF5A, NFKBIA, OPTN, YWHAE, TGFB2, PPIH, PTTG1IP, TOMM20, YWHAQ, KPNA2, SEC61G	468	215	13528	2.0167	1	0.252175	26.4976
GOTERM_BP_FAT	GO:0044271~nitrogen compound biosynthetic process	20	3.51494	0.0177764	ALDOA, ATP1B1, ATP6V0E1, ASS1, ATP5B, GLUD1, PADI3, KMO, HPRT1, PNP, TGFB2, PYCR2, NME2, SLC1A3, ATP2A2, ATP6V1E1, ATP5C1, CDA, SMS, ATP6V0D2	468	325	13528	1.77883	1	0.258615	27.3122
GOTERM_BP_FAT	GO:0033043~regulation of organelle organization	15	2.6362	0.0184592	CAV2, CAV1, TNF, EDN1, TMSB10, ARPC5, TPM1, DSTN, SET, MAD2L1, NPM1, CFL1, RHOA, MAPRE1, SYNPO	468	217	13528	1.99811	1	0.265759	28.2057
GOTERM_BP_FAT	GO:0043123~positive regulation of I-kappaB kinase/NF-kappaB cascade	9	1.58172	0.0188607	IKBKE, TNFSF10, TNF, LGALS1, RHOA, UBE2V1, WLS, BIRC2, FLNA	468	97	13528	2.682	1	0.26931	28.7262
GOTERM_BP_FAT	GO:0042990~regulation of transcription factor import into nucleus	5	0.878735	0.0188732	TNF, NFKBIE, RHOA, NFKBIA, FLNA	468	30	13528	4.81766	1	0.268063	28.7424
GOTERM_BP_FAT	GO:0006886~intracellular protein transport	22	3.86643	0.0197905	CLTA, YWHAZ, TNF, RAN, TIMM17A, NFKBIA, EIF5A, OPTN, YWHAE, TGFB2, PPIH, AP2B1, YWHAH, KRT18, VCP, NPM1, ARCN1, PTTG1IP, YWHAQ, TOMM20, KPNA2, SEC61G	468	374	13528	1.70035	1	0.277758	29.9179
GOTERM_BP_FAT	GO:0009206~purine ribonucleoside triphosphate biosynthetic process	9	1.58172	0.0199412	ALDOA, ATP1B1, NME2, ATP6V0E1, ATP2A2, ATP5B, ATP6V1E1, ATP5C1, ATP6V0D2	468	98	13528	2.65463	1	0.278139	30.1093
GOTERM_BP_FAT	GO:0009119~ribonucleoside metabolic process	6	1.05448	0.0205532	NME2, UPP1, CDA, ACLY, HPRT1, PNP	468	46	13528	3.77035	1	0.28396	30.8815
GOTERM_BP_FAT	GO:0009145~purine nucleoside triphosphate biosynthetic process	9	1.58172	0.0210649	ALDOA, ATP1B1, NME2, ATP6V0E1, ATP2A2, ATP5B, ATP6V1E1, ATP5C1, ATP6V0D2	468	99	13528	2.62782	1	0.288504	31.5209
GOTERM_BP_FAT	GO:0009201~ribonucleoside triphosphate biosynthetic process	9	1.58172	0.0210649	ALDOA, ATP1B1, NME2, ATP6V0E1, ATP2A2, ATP5B, ATP6V1E1, ATP5C1, ATP6V0D2	468	99	13528	2.62782	1	0.288504	31.5209
GOTERM_BP_FAT	GO:0010243~response to organic nitrogen	7	1.23023	0.0211944	CDKN1A, CCND1, ATP6V0E1, CCL2, CFL1, HPRT1, BIRC2	468	63	13528	3.21178	1	0.288567	31.6818
GOTERM_BP_FAT	GO:0009150~purine ribonucleotide metabolic process	11	1.93322	0.0212782	ALDOA, ATP1B1, NME2, ATP6V0E1, ATP2A2, ATP5B, ATP6V1E1, ATP5C1, OLA1, ACLY, ATP6V0D2	468	138	13528	2.3041	1	0.288104	31.7858
GOTERM_BP_FAT	GO:0048247~lymphocyte chemotaxis	3	0.527241	0.0222554	CCL2, SAA2, CXCL16	468	7	13528	12.3883	1	0.297793	32.9869
GOTERM_BP_FAT	GO:0043243~positive regulation of protein complex disassembly	3	0.527241	0.0222554	CFL1, EIF5A, DSTN	468	7	13528	12.3883	1	0.297793	32.9869
GOTERM_BP_FAT	GO:0031579~membrane raft organization	3	0.527241	0.0222554	CAV2, CAV1, MAL	468	7	13528	12.3883	1	0.297793	32.9869
GOTERM_BP_FAT	GO:0030593~neutrophil chemotaxis	4	0.702988	0.0226744	CCL2, SAA2, IL8, TGFB2	468	18	13528	6.42355	1	0.301043	33.4959
GOTERM_BP_FAT	GO:0051235~maintenance of location	7	1.23023	0.0227299	SRI, CAV1, TNF, NFKBIE, NFKBIA, TMSB10, FLNA	468	64	13528	3.16159	1	0.300211	33.563
GOTERM_BP_FAT	GO:0051153~regulation of striated muscle cell differentiation	5	0.878735	0.0234692	MORF4L2, EDN1, UBC, UBB, IGFBP3	468	32	13528	4.51656	1	0.306919	34.4512
GOTERM_BP_FAT	GO:0009142~nucleoside triphosphate biosynthetic process	9	1.58172	0.0247045	ALDOA, ATP1B1, NME2, ATP6V0E1, ATP2A2, ATP5B, ATP6V1E1, ATP5C1, ATP6V0D2	468	102	13528	2.55053	1	0.318829	35.9104
GOTERM_BP_FAT	GO:0043065~positive regulation of apoptosis	24	4.21793	0.025509	TNF, CEBPB, EIF5A, BNIP3, CD70, MAL, SOD1, YWHAE, TGFB2, PLEKHF1, UTP11L, TNFSF10, CDKN1A, DYNLL1, SQSTM1, ETS1, EEF1E1, UBC, PYCARD, AATF, UBB, PDCD5, IGFBP3, FOSL1	468	430	13528	1.61336	1	0.325884	36.8441
GOTERM_BP_FAT	GO:0008285~negative regulation of cell proliferation	21	3.69069	0.0256165	CAV2, CAV1, TNF, RARRES1, IL8, IFITM1, TIMP2, SOD2, TGFB2, NME2, SIRPG, CDKN1A, KRT5, ETS1, EEF1E1, BTG3, NPM1, PLA2G2A, THBS1, IGFBP3, FOSL1	468	361	13528	1.68151	1	0.325511	36.9679
GOTERM_BP_FAT	GO:0045639~positive regulation of myeloid cell differentiation	5	0.878735	0.0259998	LIF, HIF1A, ETS1, KITLG, JAG1	468	33	13528	4.37969	1	0.328018	37.4074
GOTERM_BP_FAT	GO:0051090~regulation of transcription factor activity	9	1.58172	0.0260097	ICAM1, SUMO1, TNF, ID1, NPM1, PYCARD, UBE2V1, NFKBIA, FLNA	468	103	13528	2.52577	1	0.326628	37.4188
GOTERM_BP_FAT	GO:0009084~glutamine family amino acid biosynthetic process	4	0.702988	0.0262515	PYCR2, SLC1A3, ASS1, GLUD1	468	19	13528	6.08547	1	0.327642	37.6945
GOTERM_BP_FAT	GO:0051258~protein polymerization	6	1.05448	0.0263047	CAV2, CAV1, TUBB2B, TUBB2A, TUBA1B, TUBA1C	468	49	13528	3.53951	1	0.326712	37.7551
GOTERM_BP_FAT	GO:0043068~positive regulation of programmed cell death	24	4.21793	0.0270569	TNF, CEBPB, EIF5A, BNIP3, CD70, MAL, SOD1, YWHAE, TGFB2, PLEKHF1, UTP11L, TNFSF10, CDKN1A, DYNLL1, SQSTM1, ETS1, EEF1E1, UBC, PYCARD, AATF, UBB, PDCD5, IGFBP3, FOSL1	468	433	13528	1.60218	1	0.332899	38.6046
GOTERM_BP_FAT	GO:0051222~positive regulation of protein transport	7	1.23023	0.0277799	TNF, SAA2, RHOA, PYCARD, FLNA, ADAM9, TGFB2	468	67	13528	3.02003	1	0.338677	39.4111
GOTERM_BP_FAT	GO:0044270~nitrogen compound catabolic process	7	1.23023	0.0277799	TST, ATP5B, UPP1, OLA1, CDA, ACLY, PNP	468	67	13528	3.02003	1	0.338677	39.4111
GOTERM_BP_FAT	GO:0010942~positive regulation of cell death	24	4.21793	0.0284974	TNF, CEBPB, EIF5A, BNIP3, CD70, MAL, SOD1, YWHAE, TGFB2, PLEKHF1, UTP11L, TNFSF10, CDKN1A, DYNLL1, SQSTM1, ETS1, EEF1E1, UBC, PYCARD, AATF, UBB, PDCD5, IGFBP3, FOSL1	468	435	13528	1.59481	1	0.344294	40.2014
GOTERM_BP_FAT	GO:0019047~provirus integration	3	0.527241	0.0290036	PPIA, XRCC6, BANF1	468	8	13528	10.8397	1	0.347751	40.7531
GOTERM_BP_FAT	GO:0030069~lysogeny	3	0.527241	0.0290036	PPIA, XRCC6, BANF1	468	8	13528	10.8397	1	0.347751	40.7531
GOTERM_BP_FAT	GO:0010740~positive regulation of protein kinase cascade	12	2.10896	0.0302133	LIF, IKBKE, TNFSF10, TNF, F3, LGALS1, RHOA, UBE2V1, WLS, BIRC2, FLNA, TGFB2	468	167	13528	2.07708	1	0.357914	42.0522
GOTERM_BP_FAT	GO:0014031~mesenchymal cell development	6	1.05448	0.0306569	S100A4, HIF1A, EDN1, CFL1, KITLG, TGFB2	468	51	13528	3.4007	1	0.360607	42.5218
GOTERM_BP_FAT	GO:0048762~mesenchymal cell differentiation	6	1.05448	0.0306569	S100A4, HIF1A, EDN1, CFL1, KITLG, TGFB2	468	51	13528	3.4007	1	0.360607	42.5218
GOTERM_BP_FAT	GO:0009259~ribonucleotide metabolic process	11	1.93322	0.0312113	ALDOA, ATP1B1, NME2, ATP6V0E1, ATP2A2, ATP5B, ATP6V1E1, ATP5C1, OLA1, ACLY, ATP6V0D2	468	147	13528	2.16303	1	0.364301	43.1037
GOTERM_BP_FAT	GO:0022618~ribonucleoprotein complex assembly	7	1.23023	0.0315283	EIF6, NPM1, DDX1, SNRPB, SF3A1, SNRPE, SF3A3	468	69	13528	2.93249	1	0.365732	43.4339
GOTERM_BP_FAT	GO:0031099~regeneration	7	1.23023	0.0315283	LIF, KLK6, CDKN1A, CCND1, CCL2, SOCS3, GAS6	468	69	13528	2.93249	1	0.365732	43.4339
GOTERM_BP_FAT	GO:0051146~striated muscle cell differentiation	8	1.40598	0.0322732	ACTG1, CAST, CAV2, ATG5, TNC, CAPN2, TPM1, ITGB1	468	88	13528	2.62782	1	0.371089	44.2028
GOTERM_BP_FAT	GO:0042176~regulation of protein catabolic process	6	1.05448	0.0329925	HSP90AB1, TNF, PSMD2, FLNA, ADAM9, TIMP1	468	52	13528	3.33531	1	0.376118	44.9358
GOTERM_BP_FAT	GO:0060485~mesenchyme development	6	1.05448	0.0329925	S100A4, HIF1A, EDN1, CFL1, KITLG, TGFB2	468	52	13528	3.33531	1	0.376118	44.9358
GOTERM_BP_FAT	GO:0006733~oxidoreduction coenzyme metabolic process	6	1.05448	0.0329925	LDHB, TPI1, IDH3B, KMO, PNP, MDH1	468	52	13528	3.33531	1	0.376118	44.9358
GOTERM_BP_FAT	GO:0042060~wound healing	13	2.28471	0.0333284	KLK6, F2RL1, CDH3, ANXA5, TPM1, TGFB2, HIF1A, SAA2, ITGA5, F3, SERPINB2, SERPINA1, ANXA8L2	468	191	13528	1.96742	1	0.377616	45.2749
GOTERM_BP_FAT	GO:0043388~positive regulation of DNA binding	7	1.23023	0.0335201	ICAM1, NME2, TNF, NPM1, PYCARD, UBE2V1, CALM2	468	70	13528	2.8906	1	0.377805	45.4677
GOTERM_BP_FAT	GO:0032956~regulation of actin cytoskeleton organization	8	1.40598	0.0340318	EDN1, CFL1, RHOA, TMSB10, ARPC5, TPM1, DSTN, SYNPO	468	89	13528	2.59829	1	0.380837	45.9788
GOTERM_BP_FAT	GO:0006754~ATP biosynthetic process	8	1.40598	0.0340318	ALDOA, ATP1B1, ATP6V0E1, ATP2A2, ATP5B, ATP6V1E1, ATP5C1, ATP6V0D2	468	89	13528	2.59829	1	0.380837	45.9788
GOTERM_BP_FAT	GO:0007160~cell-matrix adhesion	8	1.40598	0.0340318	ITGAV, RHOA, ACTN1, C22ORF28, BCAM, ITGA3, ITGB1, ADAM9	468	89	13528	2.59829	1	0.380837	45.9788
GOTERM_BP_FAT	GO:0050792~regulation of viral reproduction	4	0.702988	0.0342544	TNF, IL8, PPIA, TNIP1	468	21	13528	5.5059	1	0.38128	46.1998
GOTERM_BP_FAT	GO:0048545~response to steroid hormone stimulus	13	2.28471	0.0344896	CAV2, CAV1, CCL2, TNF, SOCS3, TGFB2, CCND1, CDKN1A, CA9, SERPINA1, THBS1, FOSL1, ADAM9	468	192	13528	1.95718	1	0.38183	46.4324
GOTERM_BP_FAT	GO:0010038~response to metal ion	10	1.75747	0.0346498	EGFR, ACTG1, ACTB, CAV1, CCND1, SERPINA1, SOD1, THBS1, CALM2, ADAM9	468	129	13528	2.24077	1	0.381719	46.5902
GOTERM_BP_FAT	GO:0006873~cellular ion homeostasis	21	3.69069	0.0352625	KLK6, SRI, CAV1, ATP6V0E1, CCL2, ATP5B, EDN1, F2RL1, BNIP3, MAL, SOD1, APLP2, SOD2, CKB, ANXA7, SAA2, ATP2A2, GNB1, CLDN1, TPT1, FTL	468	374	13528	1.62306	1	0.385531	47.1899
GOTERM_BP_FAT	GO:0035150~regulation of tube size	6	1.05448	0.035436	CAV2, CAV1, ATG5, EDN1, SOD1, SOD2	468	53	13528	3.27238	1	0.385519	47.3586
GOTERM_BP_FAT	GO:0030162~regulation of proteolysis	6	1.05448	0.035436	HSP90AB1, TNF, SERPINB4, THBS1, ADAM9, TIMP1	468	53	13528	3.27238	1	0.385519	47.3586
GOTERM_BP_FAT	GO:0050880~regulation of blood vessel size	6	1.05448	0.035436	CAV2, CAV1, ATG5, EDN1, SOD1, SOD2	468	53	13528	3.27238	1	0.385519	47.3586
GOTERM_BP_FAT	GO:0034654~nucleobase, nucleoside, nucleotide and nucleic acid biosynthetic process	13	2.28471	0.0356794	ALDOA, ATP1B1, NME2, ATP6V0E1, ATP2A2, ATP5B, ATP6V1E1, ATP5C1, CDA, KMO, HPRT1, ATP6V0D2, PNP	468	193	13528	1.94704	1	0.386105	47.5943
GOTERM_BP_FAT	GO:0034404~nucleobase, nucleoside and nucleotide biosynthetic process	13	2.28471	0.0356794	ALDOA, ATP1B1, NME2, ATP6V0E1, ATP2A2, ATP5B, ATP6V1E1, ATP5C1, CDA, KMO, HPRT1, ATP6V0D2, PNP	468	193	13528	1.94704	1	0.386105	47.5943
GOTERM_BP_FAT	GO:0001819~positive regulation of cytokine production	8	1.40598	0.0358529	HIF1A, TNF, IL27RA, SAA2, IL18, PYCARD, SOD1, THBS1	468	90	13528	2.56942	1	0.386091	47.7618
GOTERM_BP_FAT	GO:0045684~positive regulation of epidermis development	3	0.527241	0.0364506	NME2, TNF, TGFB2	468	9	13528	9.63533	1	0.38966	48.3347
GOTERM_BP_FAT	GO:0045596~negative regulation of cell differentiation	14	2.46046	0.036913	LIF, RTN4, CAV1, NME2, WNT4, CCND1, YWHAH, ITGAV, RHOA, PLA2G2A, NFKBIA, JAG1, ITGB1, SOD2	468	216	13528	1.87354	1	0.392047	48.7739
GOTERM_BP_FAT	GO:0017038~protein import	10	1.75747	0.0376782	PPIH, YWHAZ, TNF, RAN, TIMM17A, PTTG1IP, TOMM20, NFKBIA, KPNA2, TGFB2	468	131	13528	2.20656	1	0.396907	49.4929
GOTERM_BP_FAT	GO:0030595~leukocyte chemotaxis	5	0.878735	0.0377101	CCL2, SAA2, IL8, CXCL16, TGFB2	468	37	13528	3.90621	1	0.39568	49.5227
GOTERM_BP_FAT	GO:0051726~regulation of cell cycle	19	3.33919	0.0385823	EGFR, CAV2, TNF, EDN1, UBE2C, ITGB1, TGFB2, LIF, CCND1, CDKN1A, MAD2L1, ETS1, BTG3, NPM1, CKS2, AATF, GADD45A, FOSL1, HSPA8	468	331	13528	1.65926	1	0.401321	50.3302
GOTERM_BP_FAT	GO:0007157~heterophilic cell adhesion	4	0.702988	0.0386754	ICAM1, AMIGO2, ITGA5, L1CAM	468	22	13528	5.25563	1	0.400589	50.4157
GOTERM_BP_FAT	GO:0019059~initiation of viral infection	4	0.702988	0.0386754	ICAM1, PPIA, XRCC6, BANF1	468	22	13528	5.25563	1	0.400589	50.4157
GOTERM_BP_FAT	GO:0022407~regulation of cell-cell adhesion	4	0.702988	0.0386754	SIRPG, TNF, L1CAM, FXYD5	468	22	13528	5.25563	1	0.400589	50.4157
GOTERM_BP_FAT	GO:0051259~protein oligomerization	12	2.10896	0.0389844	CAV2, CAV1, VCP, C1QTNF1, NPM1, PFKP, CDA, HPRT1, BIRC3, ANXA5, BIRC2, SOD2	468	174	13528	1.99352	1	0.401602	50.6984
GOTERM_BP_FAT	GO:0051098~regulation of binding	11	1.93322	0.0394199	ICAM1, SUMO1, NME2, TNF, ID1, NPM1, PYCARD, UBE2V1, NFKBIA, CALM2, FLNA	468	153	13528	2.07821	1	0.403614	51.0943
GOTERM_BP_FAT	GO:0032970~regulation of actin filament-based process	8	1.40598	0.0396857	EDN1, CFL1, RHOA, TMSB10, ARPC5, TPM1, DSTN, SYNPO	468	92	13528	2.51356	1	0.404257	51.3344
GOTERM_BP_FAT	GO:0055082~cellular chemical homeostasis	21	3.69069	0.0412137	KLK6, SRI, CAV1, ATP6V0E1, CCL2, ATP5B, EDN1, F2RL1, BNIP3, MAL, SOD1, APLP2, SOD2, CKB, ANXA7, SAA2, ATP2A2, GNB1, CLDN1, TPT1, FTL	468	380	13528	1.59744	1	0.414777	52.6933
GOTERM_BP_FAT	GO:0009719~response to endogenous stimulus	22	3.86643	0.0417985	CAV2, CAV1, ATP6V0E1, TNF, CCL2, SOCS3, ADIPOR1, UQCRFS1, HPRT1, BIRC2, TGFB2, CDKN1A, CCND1, CA9, GNB1, CFL1, SERPINA1, THBS1, FOSL1, GNG5, MB, ADAM9	468	405	13528	1.5702	1	0.417814	53.2039
GOTERM_BP_FAT	GO:0016192~vesicle-mediated transport	29	5.09666	0.0431105	RAB7A, CAV2, CAV1, YWHAZ, CLTA, GNAI3, CHMP5, ATP5B, AP2B1, PICALM, SQSTM1, FOLR1, ITGAV, CAP1, THBS1, HSPA8, FTL, GABARAPL2, OPTN, FLNA, NME2, KRT18, VCP, CXCL16, TXNDC5, ARF4, ARCN1, MCFD2, VAMP3	468	576	13528	1.45534	1	0.426331	54.3304
GOTERM_BP_FAT	GO:0010332~response to gamma radiation	4	0.702988	0.0433714	CAV1, CCL2, SOCS3, SOD2	468	23	13528	5.02713	1	0.426805	54.5513
GOTERM_BP_FAT	GO:0055001~muscle cell development	6	1.05448	0.0434228	ACTG1, CAV2, ATG5, TNC, TPM1, ITGB1	468	56	13528	3.09707	1	0.425705	54.5948
GOTERM_BP_FAT	GO:0051223~regulation of protein transport	9	1.58172	0.043637	TNF, SAA2, NFKBIE, RHOA, PYCARD, NFKBIA, FLNA, ADAM9, TGFB2	468	114	13528	2.28205	1	0.42583	54.7753
GOTERM_BP_FAT	GO:0051051~negative regulation of transport	10	1.75747	0.0442662	LIF, PEA15, TNF, NFKBIE, ITGAV, EDN1, NFKBIA, THBS1, CALM2, FLNA	468	135	13528	2.14118	1	0.42903	55.3015
GOTERM_BP_FAT	GO:0051147~regulation of muscle cell differentiation	5	0.878735	0.0445298	MORF4L2, EDN1, UBC, UBB, IGFBP3	468	39	13528	3.7059	1	0.429503	55.5202
GOTERM_BP_FAT	GO:0060326~cell chemotaxis	5	0.878735	0.0445298	CCL2, SAA2, IL8, CXCL16, TGFB2	468	39	13528	3.7059	1	0.429503	55.5202
GOTERM_BP_FAT	GO:0051260~protein homooligomerization	8	1.40598	0.0459205	CAV1, VCP, C1QTNF1, PFKP, CDA, HPRT1, ANXA5, SOD2	468	95	13528	2.43419	1	0.438166	56.6577
GOTERM_BP_FAT	GO:0008104~protein localization	41	7.20562	0.0459973	RAB7A, YWHAZ, CAV1, CLTA, TNF, NFKBIE, CHMP5, TIMM17A, NFKBIA, EIF5A, CXCL10, TGFB2, AP2B1, SQSTM1, NPM1, EGFR, GABARAPL2, GDI2, RAN, MAL, TMSB10, OPTN, YWHAE, FLNA, RAB31, PPIH, KRT18, YWHAH, VCP, ID1, BACE2, ARF4, ARCN1, MCFD2, YWHAQ, PTTG1IP, TOMM20, RANGRF, RAB10, KPNA2, SEC61G	468	882	13528	1.3437	1	0.437245	56.7198
GOTERM_BP_FAT	GO:0050804~regulation of synaptic transmission	10	1.75747	0.0460264	EGFR, YWHAH, SLC1A3, TNF, GNAI3, CCL2, EDN1, UBC, PINK1, UBB	468	136	13528	2.12544	1	0.435988	56.7432
GOTERM_BP_FAT	GO:0045787~positive regulation of cell cycle	6	1.05448	0.0463061	EGFR, CCND1, TNF, EDN1, FOSL1, TGFB2	468	57	13528	3.04274	1	0.436534	56.9682
GOTERM_BP_FAT	GO:0022613~ribonucleoprotein complex biogenesis	12	2.10896	0.0478002	EIF6, UTP11L, RPL14, NPM1, DDX1, SNRPB, AATF, FTSJ1, SF3A1, NOP10, SNRPE, SF3A3	468	180	13528	1.92707	1	0.445651	58.1516
GOTERM_BP_FAT	GO:0006417~regulation of translation	10	1.75747	0.0478326	EIF4G2, TNF, EIF4H, KRT7, MAGOH, DDX1, HSPB1, EIF5A, ETF1, THBS1	468	137	13528	2.10993	1	0.444416	58.1769
GOTERM_BP_FAT	GO:0009894~regulation of catabolic process	8	1.40598	0.0481304	HSP90AB1, HIF1A, TNF, PGAM1, PSMD2, FLNA, ADAM9, TIMP1	468	96	13528	2.40883	1	0.445039	58.4089
GOTERM_BP_FAT	GO:0006953~acute-phase response	5	0.878735	0.0481813	CEBPB, SAA2, SAA3P, SERPINA3, SERPINA1	468	40	13528	3.61325	1	0.443945	58.4485
GOTERM_BP_FAT	GO:0015985~energy coupled proton transport, down electrochemical gradient	5	0.878735	0.0481813	ATP6V0E1, ATP5B, ATP6V1E1, ATP5C1, ATP6V0D2	468	40	13528	3.61325	1	0.443945	58.4485
GOTERM_BP_FAT	GO:0015986~ATP synthesis coupled proton transport	5	0.878735	0.0481813	ATP6V0E1, ATP5B, ATP6V1E1, ATP5C1, ATP6V0D2	468	40	13528	3.61325	1	0.443945	58.4485
GOTERM_BP_FAT	GO:0030433~ER-associated protein catabolic process	4	0.702988	0.0483379	VCP, FBXO2, UBC, UBB	468	24	13528	4.81766	1	0.44359	58.5699
GOTERM_BP_FAT	GO:0032535~regulation of cellular component size	16	2.81195	0.0486946	RTN4, ATP6V0E1, TNFRSF12A, EDN1, ADIPOR1, TMSB10, ARPC5, IL7R, DSTN, TGFB2, CDKN1A, CXCL16, NPM1, CFL1, CDA, ENO1	468	271	13528	1.70663	1	0.444615	58.8452
GOTERM_BP_FAT	GO:0006892~post-Golgi vesicle-mediated transport	6	1.05448	0.0493006	CLTA, KRT18, TXNDC5, OPTN, HSPA8, FTL	468	58	13528	2.99027	1	0.447333	59.3089
GOTERM_BP_FAT	GO:0003018~vascular process in circulatory system	6	1.05448	0.0493006	CAV2, CAV1, ATG5, EDN1, SOD1, SOD2	468	58	13528	2.99027	1	0.447333	59.3089
GOTERM_BP_FAT	GO:0034655~nucleobase, nucleoside, nucleotide and nucleic acid catabolic process	6	1.05448	0.0493006	ATP5B, UPP1, OLA1, CDA, ACLY, PNP	468	58	13528	2.99027	1	0.447333	59.3089
GOTERM_BP_FAT	GO:0034656~nucleobase, nucleoside and nucleotide catabolic process	6	1.05448	0.0493006	ATP5B, UPP1, OLA1, CDA, ACLY, PNP	468	58	13528	2.99027	1	0.447333	59.3089
GOTERM_BP_FAT	GO:0009152~purine ribonucleotide biosynthetic process	9	1.58172	0.0495467	ALDOA, ATP1B1, NME2, ATP6V0E1, ATP2A2, ATP5B, ATP6V1E1, ATP5C1, ATP6V0D2	468	117	13528	2.22354	1	0.447579	59.4959
GOTERM_BP_FAT	GO:0032880~regulation of protein localization	10	1.75747	0.0496852	SUMO1, TNF, SAA2, NFKBIE, RHOA, PYCARD, NFKBIA, FLNA, ADAM9, TGFB2	468	138	13528	2.09464	1	0.447096	59.6007
GOTERM_BP_FAT	GO:0007005~mitochondrion organization	10	1.75747	0.0496852	CAV2, NDUFS5, YWHAZ, MRPL12, HSP90AA1, TIMM17A, TOMM20, BNIP3, HSPA4, SOD2	468	138	13528	2.09464	1	0.447096	59.6007
GOTERM_BP_FAT	GO:0006446~regulation of translational initiation	5	0.878735	0.0519934	EIF4G2, TNF, EIF4H, DDX1, HSPB1	468	41	13528	3.52512	1	0.461071	61.3108
GOTERM_BP_FAT	GO:0051092~positive regulation of NF-kappaB transcription factor activity	5	0.878735	0.0519934	ICAM1, TNF, NPM1, PYCARD, UBE2V1	468	41	13528	3.52512	1	0.461071	61.3108
GOTERM_BP_FAT	GO:0050714~positive regulation of protein secretion	5	0.878735	0.0519934	TNF, SAA2, PYCARD, ADAM9, TGFB2	468	41	13528	3.52512	1	0.461071	61.3108
GOTERM_BP_FAT	GO:0006917~induction of apoptosis	18	3.16344	0.0520667	TNF, CEBPB, BNIP3, EIF5A, CD70, MAL, YWHAE, PLEKHF1, UTP11L, TNFSF10, CDKN1A, SQSTM1, ETS1, UBC, PYCARD, AATF, UBB, PDCD5	468	320	13528	1.62596	1	0.460121	61.3639
GOTERM_BP_FAT	GO:0051099~positive regulation of binding	7	1.23023	0.0523882	ICAM1, NME2, TNF, NPM1, PYCARD, UBE2V1, CALM2	468	78	13528	2.59413	1	0.4608	61.5963
GOTERM_BP_FAT	GO:0051384~response to glucocorticoid stimulus	7	1.23023	0.0523882	CDKN1A, CAV1, CCND1, TNF, CCL2, FOSL1, ADAM9	468	78	13528	2.59413	1	0.4608	61.5963
GOTERM_BP_FAT	GO:0002526~acute inflammatory response	8	1.40598	0.0527505	YWHAZ, CEBPB, SAA2, C3, SAA3P, F3, SERPINA3, SERPINA1	468	98	13528	2.35967	1	0.461739	61.8566
GOTERM_BP_FAT	GO:0012502~induction of programmed cell death	18	3.16344	0.0528688	TNF, CEBPB, BNIP3, EIF5A, CD70, MAL, YWHAE, PLEKHF1, UTP11L, TNFSF10, CDKN1A, SQSTM1, ETS1, UBC, PYCARD, AATF, UBB, PDCD5	468	321	13528	1.6209	1	0.461091	61.9412
GOTERM_BP_FAT	GO:0022409~positive regulation of cell-cell adhesion	3	0.527241	0.0532198	SIRPG, TNF, L1CAM	468	11	13528	7.88345	1	0.461948	62.1913
GOTERM_BP_FAT	GO:0019748~secondary metabolic process	7	1.23023	0.0551221	LDHB, TPI1, CRABP2, IDH3B, KMO, PNP, MDH1	468	79	13528	2.56129	1	0.472652	63.5199
GOTERM_BP_FAT	GO:0050878~regulation of body fluid levels	10	1.75747	0.0555248	ANXA7, GPI, SAA2, F3, EDN1, F2RL1, ANXA8L2, SERPINA1, ANXA5, ANXA2	468	141	13528	2.05007	1	0.473765	63.7953
GOTERM_BP_FAT	GO:0007179~transforming growth factor beta receptor signaling pathway	6	1.05448	0.0556242	CCL2, FUT8, ID1, BAMBI, ADAM9, TGFB2	468	60	13528	2.8906	1	0.472977	63.8631
GOTERM_BP_FAT	GO:0010212~response to ionizing radiation	6	1.05448	0.0556242	CAV1, CCND1, CCL2, SOCS3, XRCC6, SOD2	468	60	13528	2.8906	1	0.472977	63.8631
GOTERM_BP_FAT	GO:0002520~immune system development	16	2.81195	0.0557379	TNF, RELB, XRCC6, KITLG, BPGM, JAG1, NFKB2, SOD1, IL7R, ITGB1, CBFB, SOD2, TGFB2, TIMP1, RPA1, MB	468	276	13528	1.67571	1	0.472283	63.9404
GOTERM_BP_FAT	GO:0006090~pyruvate metabolic process	5	0.878735	0.0559653	GPI, LDHB, TPI1, LDHA, PGM1	468	42	13528	3.44119	1	0.4723	64.0945
GOTERM_BP_FAT	GO:0030003~cellular cation homeostasis	15	2.6362	0.0573321	SRI, CAV1, ATP6V0E1, CCL2, ATP5B, F2RL1, EDN1, SOD1, APLP2, ANXA7, SAA2, ATP2A2, GNB1, TPT1, FTL	468	254	13528	1.70705	1	0.479316	65.0079
GOTERM_BP_FAT	GO:0009165~nucleotide biosynthetic process	12	2.10896	0.0578835	ALDOA, ATP1B1, NME2, ATP6V0E1, ATP2A2, ATP5B, ATP6V1E1, ATP5C1, KMO, HPRT1, ATP6V0D2, PNP	468	186	13528	1.8649	1	0.481273	65.3701
GOTERM_BP_FAT	GO:0006163~purine nucleotide metabolic process	12	2.10896	0.0578835	ALDOA, ATP1B1, NME2, ATP6V0E1, ATP2A2, ATP5B, ATP6V1E1, ATP5C1, OLA1, ACLY, HPRT1, ATP6V0D2	468	186	13528	1.8649	1	0.481273	65.3701
GOTERM_BP_FAT	GO:0070201~regulation of establishment of protein localization	9	1.58172	0.0581993	TNF, SAA2, NFKBIE, RHOA, PYCARD, NFKBIA, FLNA, ADAM9, TGFB2	468	121	13528	2.15003	1	0.48179	65.576
GOTERM_BP_FAT	GO:0032989~cellular component morphogenesis	21	3.69069	0.0586967	EGFR, ACTB, S100A4, S100A6, C22ORF28, L1CAM, SOD1, HPRT1, IL7R, TPM1, ITGB1, TGFB2, ACTG1, SLC1A3, HIF1A, CFL1, UBC, RHOA, UBB, CAP1, LAMB1	468	397	13528	1.52903	1	0.483392	65.8979
GOTERM_BP_FAT	GO:0031329~regulation of cellular catabolic process	6	1.05448	0.0589534	HSP90AB1, HIF1A, TNF, PGAM1, ADAM9, TIMP1	468	61	13528	2.84321	1	0.483543	66.0629
GOTERM_BP_FAT	GO:0046677~response to antibiotic	4	0.702988	0.0590612	SLC1A3, CCL2, ETS1, UQCRFS1	468	26	13528	4.44707	1	0.482807	66.132
GOTERM_BP_FAT	GO:0042311~vasodilation	4	0.702988	0.0590612	CAV2, ATG5, SOD1, SOD2	468	26	13528	4.44707	1	0.482807	66.132
GOTERM_BP_FAT	GO:0051289~protein homotetramerization	4	0.702988	0.0590612	PFKP, CDA, HPRT1, SOD2	468	26	13528	4.44707	1	0.482807	66.132
GOTERM_BP_FAT	GO:0019058~viral infectious cycle	5	0.878735	0.0600959	ICAM1, CCL2, PPIA, XRCC6, BANF1	468	43	13528	3.36116	1	0.487554	66.7883
GOTERM_BP_FAT	GO:0034599~cellular response to oxidative stress	5	0.878735	0.0600959	HIF1A, PRDX6, SOD1, TPM1, SOD2	468	43	13528	3.36116	1	0.487554	66.7883
GOTERM_BP_FAT	GO:0007517~muscle organ development	13	2.28471	0.0620411	SRI, CAV2, CAV1, TNC, TAGLN2, ITGB1, TPM1, CXCL10, TGFB2, LIF, TAGLN, ATG5, RHOA	468	211	13528	1.78094	1	0.497492	67.9898
GOTERM_BP_FAT	GO:0006302~double-strand break repair	6	1.05448	0.062394	RPA1, VCP, XRCC6, SOD1, SOD2, CIB1	468	62	13528	2.79735	1	0.498137	68.2032
GOTERM_BP_FAT	GO:0045214~sarcomere organization	3	0.527241	0.0624387	ACTG1, TPM1, ITGB1	468	12	13528	7.2265	1	0.497018	68.2302
GOTERM_BP_FAT	GO:0042306~regulation of protein import into nucleus	5	0.878735	0.0643837	TNF, NFKBIE, RHOA, NFKBIA, FLNA	468	44	13528	3.28477	1	0.506648	69.3822
GOTERM_BP_FAT	GO:0046165~alcohol biosynthetic process	5	0.878735	0.0643837	GPI, ISYNA1, TPI1, PYGL, PGM1	468	44	13528	3.28477	1	0.506648	69.3822
GOTERM_BP_FAT	GO:0009260~ribonucleotide biosynthetic process	9	1.58172	0.065279	ALDOA, ATP1B1, NME2, ATP6V0E1, ATP2A2, ATP5B, ATP6V1E1, ATP5C1, ATP6V0D2	468	124	13528	2.09801	1	0.510257	69.8991
GOTERM_BP_FAT	GO:0051271~negative regulation of cell motion	6	1.05448	0.0659456	CLIC4, ACTN1, THBS1, IGFBP3, TPM1, VCL	468	63	13528	2.75295	1	0.512561	70.2786
GOTERM_BP_FAT	GO:0048534~hemopoietic or lymphoid organ development	15	2.6362	0.0669517	TNF, RELB, KITLG, BPGM, JAG1, NFKB2, IL7R, SOD1, ITGB1, CBFB, SOD2, TGFB2, TIMP1, RPA1, MB	468	260	13528	1.66765	1	0.516687	70.8428
GOTERM_BP_FAT	GO:0001765~membrane raft formation	2	0.351494	0.0678528	CAV2, CAV1	468	2	13528	28.906	1	0.520187	71.3396
GOTERM_BP_FAT	GO:0042985~negative regulation of amyloid precursor protein biosynthetic process	2	0.351494	0.0678528	BACE2, AATF	468	2	13528	28.906	1	0.520187	71.3396
GOTERM_BP_FAT	GO:0034619~cellular chaperone-mediated protein complex assembly	2	0.351494	0.0678528	HSP90AA1, HSPA4	468	2	13528	28.906	1	0.520187	71.3396
GOTERM_BP_FAT	GO:0008380~RNA splicing	16	2.81195	0.067926	BCAS2, STRAP, POLR2K, MAGOH, HNRNPA2B1, SNRPB2, DDX1, SF3A1, YBX1, SF3A3, PPIH, PCBP1, SNRPB, HNRNPC, SNRPE, PRPF38A	468	284	13528	1.62851	1	0.519213	71.3796
GOTERM_BP_FAT	GO:0051969~regulation of transmission of nerve impulse	10	1.75747	0.068495	EGFR, YWHAH, SLC1A3, TNF, GNAI3, CCL2, EDN1, UBC, PINK1, UBB	468	147	13528	1.96639	1	0.520896	71.6888
GOTERM_BP_FAT	GO:0032103~positive regulation of response to external stimulus	6	1.05448	0.069608	IL8, C3, F3, F2RL1, PLA2G2A, THBS1	468	64	13528	2.70994	1	0.525435	72.2844
GOTERM_BP_FAT	GO:0009116~nucleoside metabolic process	6	1.05448	0.069608	NME2, UPP1, CDA, ACLY, HPRT1, PNP	468	64	13528	2.70994	1	0.525435	72.2844
GOTERM_BP_FAT	GO:0055080~cation homeostasis	16	2.81195	0.0698644	SRI, CAV1, ATP6V0E1, CCL2, ATP5B, F2RL1, EDN1, SOD1, APLP2, SOD2, ANXA7, SAA2, ATP2A2, GNB1, TPT1, FTL	468	286	13528	1.61712	1	0.525426	72.4199
GOTERM_BP_FAT	GO:0006081~cellular aldehyde metabolic process	4	0.702988	0.0707967	ALDH1A1, TPI1, AKR1B10, GLO1	468	28	13528	4.12943	1	0.528942	72.9075
GOTERM_BP_FAT	GO:0006164~purine nucleotide biosynthetic process	10	1.75747	0.0708265	ALDOA, ATP1B1, NME2, ATP6V0E1, ATP2A2, ATP5B, ATP6V1E1, ATP5C1, HPRT1, ATP6V0D2	468	148	13528	1.95311	1	0.527746	72.9229
GOTERM_BP_FAT	GO:0055066~di-, tri-valent inorganic cation homeostasis	14	2.46046	0.0709859	SRI, CAV1, CCL2, F2RL1, EDN1, SOD1, APLP2, SOD2, ANXA7, SAA2, ATP2A2, GNB1, TPT1, FTL	468	239	13528	1.69324	1	0.527229	73.0054
GOTERM_BP_FAT	GO:0042993~positive regulation of transcription factor import into nucleus	3	0.527241	0.0721497	TNF, RHOA, FLNA	468	13	13528	6.67061	1	0.531876	73.6005
GOTERM_BP_FAT	GO:0031113~regulation of microtubule polymerization	3	0.527241	0.0721497	CAV2, CAV1, MAPRE1	468	13	13528	6.67061	1	0.531876	73.6005
GOTERM_BP_FAT	GO:0051043~regulation of membrane protein ectodomain proteolysis	3	0.527241	0.0721497	TNF, ADAM9, TIMP1	468	13	13528	6.67061	1	0.531876	73.6005
GOTERM_BP_FAT	GO:0001775~cell activation	16	2.81195	0.0726171	EGFR, ICAM1, YWHAZ, MICB, TNF, IL8, RELB, EDN1, NFKB2, HPRT1, IL7R, ITGB1, CBFB, SAA2, ULBP2, ADAM9	468	287	13528	1.61148	1	0.532921	73.8361
GOTERM_BP_FAT	GO:0031960~response to corticosteroid stimulus	7	1.23023	0.0733071	CDKN1A, CAV1, CCND1, TNF, CCL2, FOSL1, ADAM9	468	85	13528	2.38049	1	0.535081	74.1801
GOTERM_BP_FAT	GO:0001558~regulation of cell growth	12	2.10896	0.073385	RTN4, CDKN1A, TNFRSF12A, CXCL16, MORF4L2, CDA, ADIPOR1, IGFBP3, CRIM1, CYR61, ENO1, TGFB2	468	194	13528	1.788	1	0.534143	74.2187
GOTERM_BP_FAT	GO:0060249~anatomical structure homeostasis	8	1.40598	0.0739414	PTGES3, RPA1, ALDOA, HIF1A, XRCC6, SERPINA3, SOD1, FH	468	106	13528	2.18158	1	0.535612	74.4927
GOTERM_BP_FAT	GO:0050801~ion homeostasis	21	3.69069	0.0743097	KLK6, SRI, CAV1, ATP6V0E1, CCL2, ATP5B, EDN1, F2RL1, BNIP3, MAL, SOD1, APLP2, SOD2, CKB, ANXA7, SAA2, ATP2A2, GNB1, CLDN1, TPT1, FTL	468	409	13528	1.48417	1	0.536131	74.6725
GOTERM_BP_FAT	GO:0051186~cofactor metabolic process	12	2.10896	0.0754917	LDHB, TPI1, FOLR1, IDH3B, ACLY, GLO1, KMO, SOD1, PNP, FH, SOD2, MDH1	468	195	13528	1.77883	1	0.540667	75.2415
GOTERM_BP_FAT	GO:0052547~regulation of peptidase activity	7	1.23023	0.0766346	CAV1, TNF, VCP, F3, PYCARD, CSTB, HSPE1	468	86	13528	2.35281	1	0.544944	75.7802
GOTERM_BP_FAT	GO:0006606~protein import into nucleus	7	1.23023	0.0766346	PPIH, TNF, RAN, PTTG1IP, NFKBIA, KPNA2, TGFB2	468	86	13528	2.35281	1	0.544944	75.7802
GOTERM_BP_FAT	GO:0016051~carbohydrate biosynthetic process	8	1.40598	0.0768976	GPI, ISYNA1, TPI1, FUT8, PYGL, PGM1, GFPT2, EXT2	468	107	13528	2.16119	1	0.544908	75.9026
GOTERM_BP_FAT	GO:0050921~positive regulation of chemotaxis	4	0.702988	0.0770268	IL8, F3, F2RL1, THBS1	468	29	13528	3.98703	1	0.544224	75.9625
GOTERM_BP_FAT	GO:0001932~regulation of protein amino acid phosphorylation	11	1.93322	0.0770991	LIF, EGFR, CAV1, CCND1, TNF, SOCS3, EDN1, PKN1, KITLG, IGFBP3, IL22RA2	468	173	13528	1.83795	1	0.543269	75.996
GOTERM_BP_FAT	GO:0007599~hemostasis	8	1.40598	0.079922	ANXA7, GPI, SAA2, F3, F2RL1, ANXA8L2, SERPINA1, ANXA5	468	108	13528	2.14118	1	0.555424	77.2688
GOTERM_BP_FAT	GO:0055114~oxidation reduction	30	5.27241	0.0804181	HCCS, LDHB, LDHA, GLUD1, EGLN3, KMO, UQCRFS1, ALDH1A1, NDUFS5, SLC1A3, PLOD2, COX6B1, LOXL2, GAPDH, FTL, FADS3, IDH3B, SOD1, SOD2, SCCPDH, PYCR2, PRDX6, ALDH1B1, AKR1B10, AKR1B1, TXN, LEPREL1, SRXN1, MDH1, DEGS1	468	639	13528	1.35709	1	0.556447	77.4858
GOTERM_BP_FAT	GO:0006952~defense response	29	5.09666	0.0808282	YWHAZ, TNF, CCL2, IL27RA, C3, SAA3P, BNIP3, IL32, ANKRD1, ITGB1, CXCL10, SAA2, SERPINA3, SERPINA1, THBS1, TNIP1, FOSL1, CEBPB, OLR1, IL8, ANXA1, CLIC1, HLA-B, COTL1, VDAC1, HIF1A, CXCL16, F3, PLA2G2A	468	615	13528	1.36305	1	0.557062	77.6638
GOTERM_BP_FAT	GO:0032233~positive regulation of actin filament bundle formation	3	0.527241	0.082308	RHOA, TPM1, SYNPO	468	14	13528	6.19414	1	0.562604	78.2947
GOTERM_BP_FAT	GO:0051220~cytoplasmic sequestering of protein	3	0.527241	0.082308	NFKBIE, NFKBIA, FLNA	468	14	13528	6.19414	1	0.562604	78.2947
GOTERM_BP_FAT	GO:0046716~muscle maintenance	3	0.527241	0.082308	ALDOA, HIF1A, SOD1	468	14	13528	6.19414	1	0.562604	78.2947
GOTERM_BP_FAT	GO:0045823~positive regulation of heart contraction	3	0.527241	0.082308	EDN1, TPM1, TGFB2	468	14	13528	6.19414	1	0.562604	78.2947
GOTERM_BP_FAT	GO:0009651~response to salt stress	3	0.527241	0.082308	ANXA7, TNF, KMO	468	14	13528	6.19414	1	0.562604	78.2947
GOTERM_BP_FAT	GO:0051047~positive regulation of secretion	8	1.40598	0.0830146	TNF, SAA2, GLUD1, EDN1, PYCARD, PINK1, ADAM9, TGFB2	468	109	13528	2.12154	1	0.56454	78.59
GOTERM_BP_FAT	GO:0051651~maintenance of location in cell	5	0.878735	0.0830733	SRI, CAV1, NFKBIE, NFKBIA, FLNA	468	48	13528	3.01104	1	0.563517	78.6144
GOTERM_BP_FAT	GO:0010563~negative regulation of phosphorus metabolic process	5	0.878735	0.0830733	CDKN1A, CAV1, DYNLL1, IGFBP3, YWHAE	468	48	13528	3.01104	1	0.563517	78.6144
GOTERM_BP_FAT	GO:0045936~negative regulation of phosphate metabolic process	5	0.878735	0.0830733	CDKN1A, CAV1, DYNLL1, IGFBP3, YWHAE	468	48	13528	3.01104	1	0.563517	78.6144
GOTERM_BP_FAT	GO:0045185~maintenance of protein location	5	0.878735	0.0830733	CAV1, NFKBIE, NFKBIA, TMSB10, FLNA	468	48	13528	3.01104	1	0.563517	78.6144
GOTERM_BP_FAT	GO:0031644~regulation of neurological system process	10	1.75747	0.0832179	EGFR, YWHAH, SLC1A3, TNF, GNAI3, CCL2, EDN1, UBC, PINK1, UBB	468	153	13528	1.88928	1	0.562889	78.6743
GOTERM_BP_FAT	GO:0007566~embryo implantation	4	0.702988	0.0834883	LIF, FKBP4, LAMB1, SOD1	468	30	13528	3.85413	1	0.562835	78.7859
GOTERM_BP_FAT	GO:0034614~cellular response to reactive oxygen species	4	0.702988	0.0834883	PRDX6, SOD1, TPM1, SOD2	468	30	13528	3.85413	1	0.562835	78.7859
GOTERM_BP_FAT	GO:0051170~nuclear import	7	1.23023	0.0835419	PPIH, TNF, RAN, PTTG1IP, NFKBIA, KPNA2, TGFB2	468	88	13528	2.29934	1	0.561801	78.8079
GOTERM_BP_FAT	GO:0048193~Golgi vesicle transport	9	1.58172	0.083792	GABARAPL2, CLTA, KRT18, VCP, TXNDC5, ARCN1, OPTN, HSPA8, FTL	468	131	13528	1.98591	1	0.56166	78.9106
GOTERM_BP_FAT	GO:0022604~regulation of cell morphogenesis	9	1.58172	0.083792	RTN4, ALDOA, ANXA7, YWHAH, TNFRSF12A, FERMT2, RHOA, CFDP1, TGFB2	468	131	13528	1.98591	1	0.56166	78.9106
GOTERM_BP_FAT	GO:0001701~in utero embryonic development	11	1.93322	0.0842	RPA1, HIF1A, CEBPB, FUT8, PSMC4, EDN1, BTF3, CAPN2, TPM1, ITGB1, YBX1	468	176	13528	1.80662	1	0.562229	79.077
GOTERM_BP_FAT	GO:0009891~positive regulation of biosynthetic process	32	5.6239	0.0859486	HSP90AB1, CNBP, TNF, MORF4L2, EDN1, XRCC6, NFKBIA, KITLG, EIF5A, CBFB, TGFB2, LIF, MRPL12, SQSTM1, NPM1, AATF, THBS1, FOSL1, EGFR, ICAM1, HSP90AA1, CEBPB, RAN, SOD2, YWHAH, HIF1A, ILF2, ETS1, NCOA4, UBC, NFE2L2, UBB	468	695	13528	1.33092	1	0.56875	79.7762
GOTERM_BP_FAT	GO:0034220~ion transmembrane transport	5	0.878735	0.0881194	ATP6V0E1, ATP5B, ATP6V1E1, ATP5C1, ATP6V0D2	468	49	13528	2.94959	1	0.576975	80.6136
GOTERM_BP_FAT	GO:0060341~regulation of cellular localization	14	2.46046	0.0894438	TNF, NFKBIE, GLUD1, EDN1, PINK1, NFKBIA, FLNA, TGFB2, LIF, SAA2, PYCARD, RHOA, CALM2, ADAM9	468	248	13528	1.63179	1	0.581407	81.1083
GOTERM_BP_FAT	GO:0034637~cellular carbohydrate biosynthetic process	6	1.05448	0.089556	GPI, ISYNA1, TPI1, PYGL, PGM1, EXT2	468	69	13528	2.51356	1	0.580627	81.1497
GOTERM_BP_FAT	GO:0006839~mitochondrial transport	6	1.05448	0.089556	YWHAZ, HSP90AA1, SLC1A3, TIMM17A, TOMM20, BNIP3	468	69	13528	2.51356	1	0.580627	81.1497
GOTERM_BP_FAT	GO:0022406~membrane docking	4	0.702988	0.0901733	ICAM1, CAV2, VAMP3, MSN	468	31	13528	3.7298	1	0.581998	81.3757
GOTERM_BP_FAT	GO:0050920~regulation of chemotaxis	4	0.702988	0.0901733	IL8, F3, F2RL1, THBS1	468	31	13528	3.7298	1	0.581998	81.3757
GOTERM_BP_FAT	GO:0006913~nucleocytoplasmic transport	10	1.75747	0.0912411	PPIH, TNF, SET, RAN, NPM1, PTTG1IP, NFKBIA, EIF5A, KPNA2, TGFB2	468	156	13528	1.85295	1	0.585252	81.7606
GOTERM_BP_FAT	GO:0042391~regulation of membrane potential	9	1.58172	0.0925821	SRI, KLK6, CAV1, EDN1, CLDN1, BNIP3, MAL, SOD1, SOD2	468	134	13528	1.94145	1	0.589598	82.2334
GOTERM_BP_FAT	GO:0001938~positive regulation of endothelial cell proliferation	3	0.527241	0.0928712	HIF1A, CCL2, F3	468	15	13528	5.7812	1	0.589549	82.3338
GOTERM_BP_FAT	GO:0002687~positive regulation of leukocyte migration	3	0.527241	0.0928712	ICAM1, F2RL1, THBS1	468	15	13528	5.7812	1	0.589549	82.3338
GOTERM_BP_FAT	GO:0007229~integrin-mediated signaling pathway	6	1.05448	0.0938664	FUT8, ITGA5, ITGAV, ITGA3, ITGB1, ADAM9	468	70	13528	2.47766	1	0.592403	82.6754
GOTERM_BP_FAT	GO:0019221~cytokine-mediated signaling pathway	6	1.05448	0.0938664	PLP2, KRT18, TNF, CCL2, KRT8, PYCARD	468	70	13528	2.47766	1	0.592403	82.6754
GOTERM_BP_FAT	GO:0030005~cellular di-, tri-valent inorganic cation homeostasis	13	2.28471	0.0945283	SRI, CAV1, CCL2, F2RL1, EDN1, SOD1, APLP2, ANXA7, ATP2A2, SAA2, GNB1, TPT1, FTL	468	227	13528	1.65541	1	0.593867	82.8991
GOTERM_BP_FAT	GO:0051169~nuclear transport	10	1.75747	0.0968345	PPIH, TNF, SET, RAN, NPM1, PTTG1IP, NFKBIA, EIF5A, KPNA2, TGFB2	468	158	13528	1.82949	1	0.60192	83.6573
GOTERM_BP_FAT	GO:0000245~spliceosome assembly	4	0.702988	0.0970737	DDX1, SF3A1, SNRPE, SF3A3	468	32	13528	3.61325	1	0.60164	83.7342
GOTERM_BP_FAT	GO:0032386~regulation of intracellular transport	6	1.05448	0.0982812	TNF, NFKBIE, RHOA, NFKBIA, CALM2, FLNA	468	71	13528	2.44276	1	0.605187	84.1167
GOTERM_BP_FAT	GO:0050678~regulation of epithelial cell proliferation	6	1.05448	0.0982812	EGFR, NME2, KRT5, PLA2G2A, LAMB1, TGFB2	468	71	13528	2.44276	1	0.605187	84.1167
GOTERM_BP_FAT	GO:0032101~regulation of response to external stimulus	10	1.75747	0.0997042	CAV1, SAA2, IL8, C3, F3, EDN1, F2RL1, PLA2G2A, THBS1, ANXA2	468	159	13528	1.81799	1	0.609523	84.5567

## Sheet: down Nx DLD GOs
Category	Term	Count	%	PValue	Genes	List Total	Pop Hits	Pop Total	Fold Enrichment	Bonferroni	Benjamini	FDR
GOTERM_BP_FAT	GO:0006414~translational elongation	7	0.752688	1.02971e-05	RPS25, RPS27, RPS3AP5, RPL15P3, RPL27, RPL24, RPL29	68	101	13528	13.788	0.00784639	0.00784639	0.0157121
GOTERM_BP_FAT	GO:0006892~post-Golgi vesicle-mediated transport	5	0.537634	0.000190668	KRT18, ARF1, FTH1, HSPA8, FTL	68	58	13528	17.1501	0.135734	0.0703409	0.29056
GOTERM_BP_FAT	GO:0055114~oxidation reduction	12	1.29032	0.000275375	ME1, CPOX, SCD, CYCS, TXN, UGDH, IFI30, PRDX5, NQO1, PRDX1, FTH1, FTL	68	639	13528	3.73598	0.189976	0.0678209	0.419393
GOTERM_BP_FAT	GO:0006986~response to unfolded protein	5	0.537634	0.000416087	HSPH1, HSP90AA1, CLIC1, HSPD1, HSPA8	68	71	13528	14.0099	0.272668	0.076508	0.63306
GOTERM_BP_FAT	GO:0006457~protein folding	6	0.645161	0.00181759	TCP1, HSP90AA1, CCT4, CCT6A, HSPD1, HSPA8	68	177	13528	6.74377	0.751352	0.242963	2.73794
GOTERM_BP_FAT	GO:0051789~response to protein stimulus	5	0.537634	0.00193423	HSPH1, HSP90AA1, CLIC1, HSPD1, HSPA8	68	107	13528	9.29632	0.772618	0.218745	2.91124
GOTERM_BP_FAT	GO:0010033~response to organic substance	11	1.1828	0.00273647	ME1, HSPH1, KRT19, HSP90AA1, TFRC, HMGCS1, CLIC1, HSPD1, UGT1A1, HSPA8, MB	68	721	13528	3.03516	0.877086	0.258787	4.09531
GOTERM_BP_FAT	GO:0010035~response to inorganic substance	6	0.645161	0.0034336	S100A16, TFRC, CPOX, PRDX5, PRDX1, MB	68	205	13528	5.82267	0.92801	0.280287	5.11326
GOTERM_BP_FAT	GO:0042592~homeostatic process	11	1.1828	0.00366735	PTGES3, CD9, MALL, TFRC, NPM1, TXN, PRDX5, PRDX1, FTH1, MB, FTL	68	751	13528	2.91392	0.939836	0.268236	5.45231
GOTERM_BP_FAT	GO:0048193~Golgi vesicle transport	5	0.537634	0.00401938	KRT18, ARF1, FTH1, HSPA8, FTL	68	131	13528	7.59317	0.954088	0.26516	5.96081
GOTERM_BP_FAT	GO:0006412~translation	7	0.752688	0.00584504	RPS25, RPS27, RPS3AP5, RPL15P3, RPL27, RPL24, RPL29	68	331	13528	4.20722	0.988718	0.334814	8.55714
GOTERM_BP_FAT	GO:0042981~regulation of apoptosis	11	1.1828	0.00591751	RPS3AP5, KRT18, CYCS, NPM1, DAD1, PRDX5, GLO1, HSPD1, PERP, NQO1, PRDX1	68	804	13528	2.72183	0.98933	0.315017	8.6588
GOTERM_BP_FAT	GO:0043067~regulation of programmed cell death	11	1.1828	0.00633542	RPS3AP5, KRT18, CYCS, NPM1, DAD1, PRDX5, GLO1, HSPD1, PERP, NQO1, PRDX1	68	812	13528	2.69502	0.992265	0.312024	9.24302
GOTERM_BP_FAT	GO:0010941~regulation of cell death	11	1.1828	0.00649798	RPS3AP5, KRT18, CYCS, NPM1, DAD1, PRDX5, GLO1, HSPD1, PERP, NQO1, PRDX1	68	815	13528	2.6851	0.993175	0.299686	9.46933
GOTERM_BP_FAT	GO:0019725~cellular homeostasis	8	0.860215	0.00805206	CD9, TFRC, NPM1, TXN, PRDX5, PRDX1, FTH1, FTL	68	466	13528	3.4153	0.997939	0.337886	11.6064
GOTERM_BP_FAT	GO:0006879~cellular iron ion homeostasis	3	0.322581	0.0102428	TFRC, FTH1, FTL	68	31	13528	19.2524	0.99962	0.388758	14.539
GOTERM_BP_FAT	GO:0016044~membrane organization	7	0.752688	0.0112923	CD9, HSP90AA1, ARF1, TFRC, FTH1, HSPA8, FTL	68	381	13528	3.65509	0.999831	0.40013	15.9113
GOTERM_BP_FAT	GO:0055072~iron ion homeostasis	3	0.322581	0.0136589	TFRC, FTH1, FTL	68	36	13528	16.5784	0.999973	0.442618	18.931
GOTERM_BP_FAT	GO:0044271~nitrogen compound biosynthetic process	6	0.645161	0.0222871	ME1, OAZ1, ASS1, CPOX, NQO1, CMPK1	68	325	13528	3.67276	1	0.596468	29.1031
GOTERM_BP_FAT	GO:0016192~vesicle-mediated transport	8	0.860215	0.023407	KRT18, ARF1, CNIH, TFRC, ARF4, FTH1, HSPA8, FTL	68	576	13528	2.76307	1	0.595847	30.3323
GOTERM_BP_FAT	GO:0042026~protein refolding	2	0.215054	0.024523	HSP90AA1, HSPD1	68	5	13528	79.5765	1	0.595245	31.5373
GOTERM_BP_FAT	GO:0043066~negative regulation of apoptosis	6	0.645161	0.0307346	KRT18, NPM1, DAD1, PRDX5, GLO1, HSPD1	68	354	13528	3.37188	1	0.662266	37.8962
GOTERM_BP_FAT	GO:0034621~cellular macromolecular complex subunit organization	6	0.645161	0.0317095	TCP1, HSP90AA1, NPM1, RPL24, HSPD1, HMGA1	68	357	13528	3.34355	1	0.657597	38.8425
GOTERM_BP_FAT	GO:0007584~response to nutrient	4	0.430108	0.0321365	TFRC, DAD1, CLIC1, UGT1A1	68	140	13528	5.68403	1	0.64696	39.2529
GOTERM_BP_FAT	GO:0043069~negative regulation of programmed cell death	6	0.645161	0.0323701	KRT18, NPM1, DAD1, PRDX5, GLO1, HSPD1	68	359	13528	3.32492	1	0.634654	39.4761
GOTERM_BP_FAT	GO:0060548~negative regulation of cell death	6	0.645161	0.0327036	KRT18, NPM1, DAD1, PRDX5, GLO1, HSPD1	68	360	13528	3.31569	1	0.62406	39.7937
GOTERM_BP_FAT	GO:0051131~chaperone-mediated protein complex assembly	2	0.215054	0.0341654	HSP90AA1, HSPD1	68	7	13528	56.8403	1	0.62654	41.1673
GOTERM_BP_FAT	GO:0045454~cell redox homeostasis	3	0.322581	0.0388848	TXN, PRDX5, PRDX1	68	63	13528	9.47339	1	0.661623	45.4045
GOTERM_BP_FAT	GO:0046394~carboxylic acid biosynthetic process	4	0.430108	0.0414971	PTGES3, ASS1, SCD, UGDH	68	155	13528	5.13397	1	0.673075	47.6255
GOTERM_BP_FAT	GO:0016053~organic acid biosynthetic process	4	0.430108	0.0414971	PTGES3, ASS1, SCD, UGDH	68	155	13528	5.13397	1	0.673075	47.6255
GOTERM_BP_FAT	GO:0006979~response to oxidative stress	4	0.430108	0.0477039	PRDX5, NQO1, PRDX1, MB	68	164	13528	4.85222	1	0.712468	52.5687
GOTERM_BP_FAT	GO:0042255~ribosome assembly	2	0.215054	0.0484533	NPM1, RPL24	68	10	13528	39.7882	1	0.706431	53.1351
GOTERM_BP_FAT	GO:0042273~ribosomal large subunit biogenesis	2	0.215054	0.0484533	NPM1, RPL24	68	10	13528	39.7882	1	0.706431	53.1351
GOTERM_BP_FAT	GO:0033209~tumor necrosis factor-mediated signaling pathway	2	0.215054	0.0484533	KRT18, KRT8	68	10	13528	39.7882	1	0.706431	53.1351
GOTERM_BP_FAT	GO:0000302~response to reactive oxygen species	3	0.322581	0.0532128	PRDX5, PRDX1, MB	68	75	13528	7.95765	1	0.729428	56.5874
GOTERM_BP_FAT	GO:0008283~cell proliferation	6	0.645161	0.06454	RPS27, TXN, HSPD1, AREG, PRDX1, FTH1	68	436	13528	2.73772	1	0.787033	63.8714
GOTERM_BP_FAT	GO:0051186~cofactor metabolic process	4	0.430108	0.0723154	ME1, CPOX, GLO1, UGT1A1	68	195	13528	4.08084	1	0.815282	68.192
GOTERM_BP_FAT	GO:0034622~cellular macromolecular complex assembly	5	0.537634	0.0726249	TCP1, HSP90AA1, NPM1, RPL24, HSPD1	68	318	13528	3.12801	1	0.807559	68.3536
GOTERM_BP_FAT	GO:0031667~response to nutrient levels	4	0.430108	0.0740673	TFRC, DAD1, CLIC1, UGT1A1	68	197	13528	4.03941	1	0.8051	69.0964
GOTERM_BP_FAT	GO:0007267~cell-cell signaling	7	0.752688	0.0760177	ISG15, CXCL5, TXN, AREG, NQO1, CCL26, VDAC1	68	600	13528	2.32098	1	0.804983	70.075
GOTERM_BP_FAT	GO:0006458~'de novo' protein folding	2	0.215054	0.0764073	HSPD1, HSPA8	68	16	13528	24.8676	1	0.798132	70.267
GOTERM_BP_FAT	GO:0006915~apoptosis	7	0.752688	0.0769745	KRT18, CYCS, KRT8, DAD1, HSPD1, PERP, VDAC1	68	602	13528	2.31327	1	0.792196	70.5444
GOTERM_BP_FAT	GO:0012501~programmed cell death	7	0.752688	0.0813657	KRT18, CYCS, KRT8, DAD1, HSPD1, PERP, VDAC1	68	611	13528	2.2792	1	0.802711	72.6118
GOTERM_BP_FAT	GO:0006928~cell motion	6	0.645161	0.0859122	ACTR2, CD9, S100P, SERPINB5, TXN, RPL24	68	475	13528	2.51294	1	0.812892	74.6088
GOTERM_BP_FAT	GO:0042493~response to drug	4	0.430108	0.0916343	CPOX, DAD1, HMGCS1, UGT1A1	68	216	13528	3.6841	1	0.82632	76.929
GOTERM_BP_FAT	GO:0006805~xenobiotic metabolic process	2	0.215054	0.0945923	NQO1, UGT1A1	68	20	13528	19.8941	1	0.829302	78.0492
GOTERM_BP_FAT	GO:0009991~response to extracellular stimulus	4	0.430108	0.0955371	TFRC, DAD1, CLIC1, UGT1A1	68	220	13528	3.61711	1	0.825501	78.3961

## Sheet: down Nx LNCaP GOs
Category	Term	Count	%	PValue	Genes	List Total	Pop Hits	Pop Total	Fold Enrichment	Bonferroni	Benjamini	FDR
GOTERM_BP_FAT	GO:0006414~translational elongation	58	21.1679	2.90873e-74	RPL18, RPL17, RPL19, RPL14, RPL13, RPLP2, RPS2, RPS3, RPS3A, RPL10, FAU, RPL12, RPL35A, EEF2, RPS18, RPS3AP5, RPL41, RPS16, RPS14, RPS15, RPS4Y1, RPS10, RPS11, UBB, UBA52, TUFM, EEF1B2, RPL35, RPS15A, RPL36, RPL38, RPS25, RPL30, RPS27, RPL32, RPS29, RPL7, RPL6, RPL9, RPL34, RPL8, RPL3, RPL5, RPL10A, RPL7A, RPL4, RPS21, EEF1A1, EEF1A2, RPL27, RPS9, RPL24, RPS6, RPS5, RPS8, RPL29, RPL23, RPL18A, RP…	247	101	13528	31.4516	4.43872e-71	4.43872e-71	4.843e-71
GOTERM_BP_FAT	GO:0006412~translation	73	26.6423	1.95403e-58	RPL18, EIF6, RPL17, RPL19, RPL14, RPL13, RPLP2, EIF5A, RPL22L1, RPS2, FDXACB1, RPS3, RPS3A, RPL10, FAU, MRPL37, RPL12, RPL35A, EEF2, MRPS2, RPS18, RPS3AP5, MRPS18B, RPL41, RPS16, RPS14, RPS15, RPS4Y1, RPS10, RPS11, FARSA, UBB, UBA52, TUFM, EEF1B2, RPL35, RPS15A, RPL36, RPL38, RPS25, EIF3D, RPL30, RPS27, RPL7, RPL32, RPS29, RPL6, EIF3E, RPL9, RPL34, RPL8, RPL3, MRPL18, RPL5, RPL10A, RPL7A, RSL24D1…	247	331	13528	12.079	2.98185e-55	1.49093e-55	3.25344e-55
GOTERM_BP_FAT	GO:0042254~ribosome biogenesis	20	7.29927	6.65073e-13	EIF6, RPL35A, RPL14, RPL24, RRP9, RPS6, FBL, RPL7, RPS16, RPS14, RPS15, NPM1, NPM3, RPL5, RPL7A, RSL24D1, PES1, IMP4, NHP2, NSA2	247	122	13528	8.97856	1.01483e-09	3.38275e-10	1.10726e-09
GOTERM_BP_FAT	GO:0022613~ribonucleoprotein complex biogenesis	23	8.39416	1.5296e-12	EIF6, RPL35A, RPL14, SNRPD2, RPL24, RRP9, RPS6, FBL, RPL7, RPS16, RPS14, PRMT5, RPS15, NPM1, SNRPB, NPM3, RPL5, RSL24D1, RPL7A, PES1, IMP4, NHP2, NSA2	247	180	13528	6.99829	2.3341e-09	5.83525e-10	2.5467e-09
GOTERM_BP_FAT	GO:0016072~rRNA metabolic process	16	5.83942	1.81152e-10	RPL35A, RPL14, MKI67IP, RRP9, RPS6, FBL, RPL7, RPS16, RPS14, RPS15, NPM3, RPL5, PES1, IMP4, NHP2, NSA2	247	96	13528	9.12821	2.76438e-07	5.52876e-08	3.01616e-07
GOTERM_BP_FAT	GO:0006364~rRNA processing	15	5.47445	1.06758e-09	RPL35A, RPL14, RRP9, RPS6, FBL, RPL7, RPS16, RPS14, RPS15, NPM3, RPL5, PES1, IMP4, NHP2, NSA2	247	92	13528	8.92977	1.62912e-06	2.71521e-07	1.77751e-06
GOTERM_BP_FAT	GO:0042273~ribosomal large subunit biogenesis	7	2.55474	6.7237e-09	RPL35A, RPL14, RPL7, NPM1, RPL5, RPL24, PES1	247	10	13528	38.3385	1.02603e-05	1.46576e-06	1.11949e-05
GOTERM_BP_FAT	GO:0034660~ncRNA metabolic process	20	7.29927	4.0511e-08	HSD17B10, RPL35A, RPL14, MKI67IP, RRP9, RPS6, FDXACB1, FBL, RPL7, RPS16, RPS14, RPS15, NPM3, RPL5, FARSA, PES1, IMP4, NHP2, TRUB2, NSA2	247	230	13528	4.76254	6.18179e-05	7.72744e-06	6.74504e-05
GOTERM_BP_FAT	GO:0034470~ncRNA processing	18	6.56934	5.31653e-08	HSD17B10, RPL35A, RPL14, RRP9, RPS6, FDXACB1, FBL, RPL7, RPS16, RPS14, RPS15, NPM3, RPL5, PES1, IMP4, NHP2, TRUB2, NSA2	247	187	13528	5.2719	8.11269e-05	9.01443e-06	8.85196e-05
GOTERM_BP_FAT	GO:0006091~generation of precursor metabolites and energy	21	7.66423	1.14497e-06	ATP5D, NDUFB4, LDHA, NDUFB7, TXN2, ATP5B, CYC1, COX8A, PGAM1, IDH3B, ATP5G1, UQCRFS1, NDUFS5, TPI1, UQCRH, TXN, COX6A1, PGK1, GAPDH, MDH2, ENO1	247	313	13528	3.67461	0.00174569	0.000174707	0.00190634
GOTERM_BP_FAT	GO:0043066~negative regulation of apoptosis	22	8.0292	2.02919e-06	HMGB1, EEF1A2, CLU, TP53, PRDX5, BNIP3, PRDX2, HSPA1B, MIF, NME2, CDKN1A, NUP62, NME1, TXNDC5, NPM1, DAD1, TPT1, HSPB1, UBB, HSPA5, HSPD1, MYC, UBA52	247	354	13528	3.40374	0.00309175	0.000281464	0.00337852
GOTERM_BP_FAT	GO:0043069~negative regulation of programmed cell death	22	8.0292	2.52618e-06	HMGB1, EEF1A2, CLU, TP53, PRDX5, BNIP3, PRDX2, HSPA1B, MIF, NME2, CDKN1A, NUP62, NME1, TXNDC5, NPM1, DAD1, TPT1, HSPB1, UBB, HSPA5, HSPD1, MYC, UBA52	247	359	13528	3.35633	0.00384753	0.000321194	0.00420598
GOTERM_BP_FAT	GO:0060548~negative regulation of cell death	22	8.0292	2.65324e-06	HMGB1, EEF1A2, CLU, TP53, PRDX5, BNIP3, PRDX2, HSPA1B, MIF, NME2, CDKN1A, NUP62, NME1, TXNDC5, NPM1, DAD1, TPT1, HSPB1, UBB, HSPA5, HSPD1, MYC, UBA52	247	360	13528	3.34701	0.00404066	0.000311401	0.00441752
GOTERM_BP_FAT	GO:0042255~ribosome assembly	5	1.82482	2.05615e-05	EIF6, RPS14, RPS15, NPM1, RPL24	247	10	13528	27.3846	0.03089	0.00223872	0.0342292
GOTERM_BP_FAT	GO:0006396~RNA processing	26	9.48905	2.16291e-05	HSD17B10, RPL14, U2AF2, SNRPD2, FDXACB1, SF3B5, YBX1, RPL7, PRMT5, PCBP1, NPM3, RPL5, RPL10A, IMP4, NSA2, RPL35A, RRP9, RPS6, FBL, RPS16, RPS14, RPS15, SNRPB, PES1, NHP2, TRUB2	247	547	13528	2.60329	0.0324677	0.00219801	0.0360062
GOTERM_BP_FAT	GO:0010035~response to inorganic substance	15	5.47445	2.31248e-05	ATP5D, TXNIP, EEF1A2, PRDX5, PRDX2, PRDX1, PARK7, MT1X, ACTG1, NPC1, CCND1, CDKN1A, TFRC, ASNA1, MB	247	205	13528	4.0075	0.0346734	0.00220312	0.0384956
GOTERM_BP_FAT	GO:0006916~anti-apoptosis	15	5.47445	2.44233e-05	HMGB1, EEF1A2, CLU, BNIP3, PRDX2, HSPA1B, TXNDC5, NPM1, TPT1, DAD1, HSPB1, UBB, HSPA5, MYC, UBA52	247	206	13528	3.98805	0.0365844	0.00218997	0.0406567
GOTERM_BP_FAT	GO:0042274~ribosomal small subunit biogenesis	5	1.82482	3.18499e-05	RPS16, RPS14, RPS15, NPM1, RPS6	247	11	13528	24.8951	0.0474415	0.00269656	0.0530166
GOTERM_BP_FAT	GO:0006839~mitochondrial transport	9	3.28467	3.42654e-05	PPIF, ATP5D, HSP90AA1, TOMM5, SLC25A6, TIMM10, TP53, TOMM20, BNIP3	247	69	13528	7.14381	0.0509463	0.00274832	0.0570362
GOTERM_BP_FAT	GO:0051438~regulation of ubiquitin-protein ligase activity	9	3.28467	8.34885e-05	CCNB1, PSMB5, PSMD13, PSMC4, PSMB3, UBB, PSMA7, FEM1A, UBA52	247	78	13528	6.31953	0.119626	0.00635019	0.138917
GOTERM_BP_FAT	GO:0031396~regulation of protein ubiquitination	10	3.64964	8.47241e-05	CCNB1, PSMB5, PSMD13, PSMC4, PSMB3, UBB, PSMA7, FEM1A, STUB1, UBA52	247	100	13528	5.47692	0.121285	0.00613797	0.140971
GOTERM_BP_FAT	GO:0006457~protein folding	13	4.74453	9.54295e-05	CCT7, PPIF, HSP90AB1, TRAP1, TCP1, HSP90AA1, PPIB, FKBP4, CCT3, CCT6A, HSPD1, STUB1, HSPA8	247	177	13528	4.0226	0.135525	0.00659779	0.158771
GOTERM_BP_FAT	GO:0051340~regulation of ligase activity	9	3.28467	0.000109293	CCNB1, PSMB5, PSMD13, PSMC4, PSMB3, UBB, PSMA7, FEM1A, UBA52	247	81	13528	6.08547	0.153623	0.00722553	0.181816
GOTERM_BP_FAT	GO:0031398~positive regulation of protein ubiquitination	9	3.28467	0.000141366	CCNB1, PSMB5, PSMD13, PSMC4, PSMB3, UBB, PSMA7, STUB1, UBA52	247	84	13528	5.86813	0.194055	0.0089489	0.235113
GOTERM_BP_FAT	GO:0031145~anaphase-promoting complex-dependent proteasomal ubiquitin-dependent protein catabolic process	8	2.91971	0.000171202	CCNB1, PSMB5, PSMD13, PSMC4, PSMB3, UBB, PSMA7, UBA52	247	65	13528	6.74083	0.229933	0.0103967	0.284669
GOTERM_BP_FAT	GO:0006096~glycolysis	7	2.55474	0.00019563	TPI1, LDHA, PGAM1, PGK1, GAPDH, MDH2, ENO1	247	47	13528	8.15712	0.258115	0.0114174	0.325224
GOTERM_BP_FAT	GO:0051437~positive regulation of ubiquitin-protein ligase activity during mitotic cell cycle	8	2.91971	0.000227638	CCNB1, PSMB5, PSMD13, PSMC4, PSMB3, UBB, PSMA7, UBA52	247	68	13528	6.44344	0.293488	0.0127848	0.378341
GOTERM_BP_FAT	GO:0022618~ribonucleoprotein complex assembly	8	2.91971	0.000249471	EIF6, PRMT5, RPS14, RPS15, NPM1, SNRPB, SNRPD2, RPL24	247	69	13528	6.35006	0.316644	0.0135058	0.414556
GOTERM_BP_FAT	GO:0051443~positive regulation of ubiquitin-protein ligase activity	8	2.91971	0.000272958	CCNB1, PSMB5, PSMD13, PSMC4, PSMB3, UBB, PSMA7, UBA52	247	70	13528	6.25934	0.340709	0.0142625	0.453503
GOTERM_BP_FAT	GO:0051439~regulation of ubiquitin-protein ligase activity during mitotic cell cycle	8	2.91971	0.000298191	CCNB1, PSMB5, PSMD13, PSMC4, PSMB3, UBB, PSMA7, UBA52	247	71	13528	6.17118	0.36562	0.0150557	0.495328
GOTERM_BP_FAT	GO:0042981~regulation of apoptosis	30	10.9489	0.000325375	HMGB1, CLU, EIF5A, BNIP3, PRDX5, PRDX2, HSPA1B, PRDX1, MIF, RPS3, RPS3A, NPM1, TPT1, DAD1, HSPA5, MYC, TXNIP, EEF1A2, PHB, TP53, RPS6, PPIF, NME2, CDKN1A, RPS3AP5, NUP62, NME1, TXNDC5, HSPB1, HSPD1, UBB, UBA52	247	804	13528	2.04363	0.391406	0.0158918	0.54037
GOTERM_BP_FAT	GO:0051351~positive regulation of ligase activity	8	2.91971	0.000354272	CCNB1, PSMB5, PSMD13, PSMC4, PSMB3, UBB, PSMA7, UBA52	247	73	13528	6.00211	0.417668	0.0167554	0.588227
GOTERM_BP_FAT	GO:0043067~regulation of programmed cell death	30	10.9489	0.000382875	HMGB1, CLU, EIF5A, BNIP3, PRDX5, PRDX2, HSPA1B, PRDX1, MIF, RPS3, RPS3A, NPM1, TPT1, DAD1, HSPA5, MYC, TXNIP, EEF1A2, PHB, TP53, RPS6, PPIF, NME2, CDKN1A, RPS3AP5, NUP62, NME1, TXNDC5, HSPB1, HSPD1, UBB, UBA52	247	812	13528	2.02349	0.442548	0.0175526	0.635577
GOTERM_BP_FAT	GO:0010941~regulation of cell death	30	10.9489	0.000406658	HMGB1, CLU, EIF5A, BNIP3, PRDX5, PRDX2, HSPA1B, PRDX1, MIF, RPS3, RPS3A, NPM1, TPT1, DAD1, HSPA5, MYC, TXNIP, EEF1A2, PHB, TP53, RPS6, PPIF, NME2, CDKN1A, RPS3AP5, NUP62, NME1, TXNDC5, HSPB1, HSPD1, UBB, UBA52	247	815	13528	2.01605	0.462425	0.0180899	0.674931
GOTERM_BP_FAT	GO:0043161~proteasomal ubiquitin-dependent protein catabolic process	9	3.28467	0.000537413	CCNB1, PSMB5, PSMD13, PSMC4, PSMB3, UBB, PSMA7, STUB1, UBA52	247	102	13528	4.83258	0.559706	0.023165	0.891034
GOTERM_BP_FAT	GO:0010498~proteasomal protein catabolic process	9	3.28467	0.000537413	CCNB1, PSMB5, PSMD13, PSMC4, PSMB3, UBB, PSMA7, STUB1, UBA52	247	102	13528	4.83258	0.559706	0.023165	0.891034
GOTERM_BP_FAT	GO:0042493~response to drug	13	4.74453	0.000599563	TXNIP, TXN2, TP53, UQCRFS1, PNP, PARK7, CDKN1A, NME2, CCND1, HMGCS2, NME1, DAD1, NPPC, HSD11B2	247	216	13528	3.2963	0.599567	0.025102	0.993597
GOTERM_BP_FAT	GO:0006007~glucose catabolic process	7	2.55474	0.000624366	TPI1, LDHA, PGAM1, PGK1, GAPDH, MDH2, ENO1	247	58	13528	6.61008	0.614448	0.02543	1.0345
GOTERM_BP_FAT	GO:0022402~cell cycle process	23	8.39416	0.000649318	RAN, TP53, RPL24, RCC1, PSMA7, UHMK1, SESN3, RPA1, PSMB5, CCNB1, CDKN1A, CCND1, PSMD13, PSMC4, PSMB3, NPM1, CKS2, UBB, RUVBL1, PES1, KPNA2, MYC, UBA52	247	565	13528	2.22954	0.628862	0.0257465	1.07563
GOTERM_BP_FAT	GO:0006979~response to oxidative stress	11	4.0146	0.000836035	TXNIP, PSMB5, PYCR1, NDUFB4, TXN2, CLU, PRDX5, PRDX2, PRDX1, PARK7, MB	247	164	13528	3.67355	0.720939	0.0321965	1.38292
GOTERM_BP_FAT	GO:0007005~mitochondrion organization	10	3.64964	0.000940283	PPIF, NDUFS5, HSP90AA1, TOMM5, CLU, TIMM10, TP53, TOMM20, BNIP3, MYC	247	138	13528	3.96878	0.762015	0.0352523	1.5541
GOTERM_BP_FAT	GO:0045454~cell redox homeostasis	7	2.55474	0.000971937	TXN2, TXNDC5, TXN, PRDX5, PRDX2, PRDX1, APEX1	247	63	13528	6.08547	0.773248	0.0355455	1.60602
GOTERM_BP_FAT	GO:0042257~ribosomal subunit assembly	3	1.09489	0.000976186	RPS14, RPS15, RPL24	247	3	13528	54.7692	0.774715	0.0348632	1.61298
GOTERM_BP_FAT	GO:0065003~macromolecular complex assembly	25	9.12409	0.00107284	EIF6, HSD17B10, FKBP4, SNRPD2, MKI67IP, MIF, NDUFS5, PRMT5, NPM1, MYC, TUBA1B, DCTPP1, TCP1, HSP90AA1, TP53, RPL24, HMGA1, UQCRH, RPS14, RPS15, TCEB2, SNRPB, H3F3B, VAMP3, HSPD1	247	665	13528	2.05899	0.805638	0.0373774	1.77135
GOTERM_BP_FAT	GO:0032268~regulation of cellular protein metabolic process	20	7.29927	0.0010876	HSP90AB1, AURKAIP1, EIF5A, PSMA7, FEM1A, RPS5, STUB1, EIF4B, PSMB5, CCNB1, EIF4EBP1, CCND1, PSMD13, PSMC4, PSMB3, EIF3E, EIF4H, HSPB1, UBB, UBA52	247	474	13528	2.31094	0.809972	0.0370373	1.79552
GOTERM_BP_FAT	GO:0051436~negative regulation of ubiquitin-protein ligase activity during mitotic cell cycle	7	2.55474	0.00114646	PSMB5, PSMD13, PSMC4, PSMB3, UBB, PSMA7, UBA52	247	65	13528	5.89822	0.826312	0.0381531	1.89181
GOTERM_BP_FAT	GO:0051444~negative regulation of ubiquitin-protein ligase activity	7	2.55474	0.00134403	PSMB5, PSMD13, PSMC4, PSMB3, UBB, PSMA7, UBA52	247	67	13528	5.72216	0.871571	0.0436362	2.21442
GOTERM_BP_FAT	GO:0051352~negative regulation of ligase activity	7	2.55474	0.00134403	PSMB5, PSMD13, PSMC4, PSMB3, UBB, PSMA7, UBA52	247	67	13528	5.72216	0.871571	0.0436362	2.21442
GOTERM_BP_FAT	GO:0019320~hexose catabolic process	7	2.55474	0.00156661	TPI1, LDHA, PGAM1, PGK1, GAPDH, MDH2, ENO1	247	69	13528	5.5563	0.908601	0.0496307	2.57665
GOTERM_BP_FAT	GO:0046365~monosaccharide catabolic process	7	2.55474	0.00181617	TPI1, LDHA, PGAM1, PGK1, GAPDH, MDH2, ENO1	247	71	13528	5.39978	0.937587	0.0561532	2.9813
GOTERM_BP_FAT	GO:0006986~response to unfolded protein	7	2.55474	0.00181617	HSP90AB1, CCND1, HSP90AA1, HSPB1, HSPD1, HSPA1B, HSPA8	247	71	13528	5.39978	0.937587	0.0561532	2.9813
GOTERM_BP_FAT	GO:0034622~cellular macromolecular complex assembly	15	5.47445	0.00207213	EIF6, TCP1, HSP90AA1, FKBP4, SNRPD2, RPL24, NDUFS5, PRMT5, RPS14, RPS15, NPM1, SNRPB, H3F3B, HSPD1, TUBA1B	247	318	13528	2.58345	0.957801	0.0625568	3.39471
GOTERM_BP_FAT	GO:0019725~cellular homeostasis	19	6.93431	0.0021863	TXN2, ATP5B, TP53, LPAR3, PRDX5, BNIP3, PRDX2, PRDX1, PARK7, CKB, TFRC, ATP2A2, TXNDC5, TXN, NPM1, TPT1, ASNA1, MYC, APEX1	247	466	13528	2.23308	0.964561	0.0646168	3.57855
GOTERM_BP_FAT	GO:0031397~negative regulation of protein ubiquitination	7	2.55474	0.00224559	PSMB5, PSMD13, PSMC4, PSMB3, UBB, PSMA7, UBA52	247	74	13528	5.18087	0.967633	0.0650546	3.6739
GOTERM_BP_FAT	GO:0034621~cellular macromolecular complex subunit organization	16	5.83942	0.00230579	EIF6, TCP1, HSP90AA1, FKBP4, SNRPD2, RPL24, HMGA1, NDUFS5, PRMT5, RPS14, RPS15, NPM1, SNRPB, H3F3B, HSPD1, TUBA1B	247	357	13528	2.45464	0.97048	0.0655006	3.77063
GOTERM_BP_FAT	GO:0044271~nitrogen compound biosynthetic process	15	5.47445	0.00251673	ATP5D, ODC1, ATP1B1, SRM, ATP5B, ATP5G1, PNP, APRT, PYCR1, NME2, PYCR2, OAZ1, ATP2A2, NME1, NPPC, IMPDH2	247	325	13528	2.52781	0.978621	0.0699846	4.10881
GOTERM_BP_FAT	GO:0043933~macromolecular complex subunit organization	25	9.12409	0.00255136	EIF6, HSD17B10, FKBP4, SNRPD2, MKI67IP, MIF, NDUFS5, PRMT5, NPM1, MYC, TUBA1B, DCTPP1, TCP1, HSP90AA1, TP53, RPL24, HMGA1, UQCRH, RPS14, RPS15, TCEB2, SNRPB, H3F3B, VAMP3, HSPD1	247	710	13528	1.92849	0.979725	0.0696474	4.16422
GOTERM_BP_FAT	GO:0042592~homeostatic process	26	9.48905	0.00256716	PTGES3, TXN2, ATP5B, XRCC6, LPAR3, PRDX5, BNIP3, PRDX2, PRDX1, CKB, RPA1, NPM1, TPT1, MYC, APEX1, MB, TP53, RPS6, PARK7, NPC1, TFRC, ATP2A2, RPS14, TXNDC5, TXN, ASNA1	247	751	13528	1.89614	0.980209	0.0688349	4.1895
GOTERM_BP_FAT	GO:0007006~mitochondrial membrane organization	5	1.82482	0.00257146	PPIF, HSP90AA1, TIMM10, TP53, BNIP3	247	32	13528	8.55769	0.980339	0.0677576	4.19637
GOTERM_BP_FAT	GO:0000278~mitotic cell cycle	16	5.83942	0.00320828	RAN, RPL24, RCC1, PSMA7, PSMB5, CCNB1, CCND1, CDKN1A, PSMD13, PSMC4, PSMB3, UBB, RUVBL1, PES1, KPNA2, UBA52	247	370	13528	2.3684	0.992581	0.0824331	5.20972
GOTERM_BP_FAT	GO:0046164~alcohol catabolic process	7	2.55474	0.00354176	TPI1, LDHA, PGAM1, PGK1, GAPDH, MDH2, ENO1	247	81	13528	4.73314	0.995548	0.0891258	5.73636
GOTERM_BP_FAT	GO:0032270~positive regulation of cellular protein metabolic process	12	4.37956	0.00362206	CCNB1, PSMB5, CCND1, PSMD13, AURKAIP1, PSMC4, PSMB3, EIF5A, UBB, PSMA7, STUB1, UBA52	247	233	13528	2.82073	0.996063	0.0895829	5.86275
GOTERM_BP_FAT	GO:0007049~cell cycle	26	9.48905	0.00390352	EID1, PSMA7, RCC1, UHMK1, SESN3, RPA1, PSMB5, MCM7, PSMB3, NPM1, MYC, TXNIP, RAN, TP53, RPL24, CCNB1, CDKN1A, CCND1, PSMD13, PSMC4, CKS2, RUVBL1, UBB, PES1, KPNA2, UBA52	247	776	13528	1.83505	0.997442	0.0946864	6.30454
GOTERM_BP_FAT	GO:0070482~response to oxygen levels	9	3.28467	0.00424317	CDKN1A, ATP1B1, TFRC, TXN2, NPPC, HSD11B2, BNIP3, MB, DDIT4	247	141	13528	3.49591	0.99848	0.100912	6.83506
GOTERM_BP_FAT	GO:0044275~cellular carbohydrate catabolic process	7	2.55474	0.00449537	TPI1, LDHA, PGAM1, PGK1, GAPDH, MDH2, ENO1	247	85	13528	4.51041	0.998967	0.104966	7.22716
GOTERM_BP_FAT	GO:0022900~electron transport chain	8	2.91971	0.00477951	NDUFB4, NDUFS5, NDUFB7, TXN2, UQCRH, TXN, CYC1, UQCRFS1	247	114	13528	3.84345	0.999332	0.109567	7.66705
GOTERM_BP_FAT	GO:0051247~positive regulation of protein metabolic process	12	4.37956	0.00497599	CCNB1, PSMB5, CCND1, PSMD13, AURKAIP1, PSMC4, PSMB3, EIF5A, UBB, PSMA7, STUB1, UBA52	247	243	13528	2.70465	0.999506	0.112141	7.97009
GOTERM_BP_FAT	GO:0032269~negative regulation of cellular protein metabolic process	10	3.64964	0.00569864	PSMB5, HSP90AB1, EIF4EBP1, PSMD13, PSMC4, PSMB3, EIF3E, UBB, PSMA7, UBA52	247	180	13528	3.04274	0.999837	0.125558	9.07663
GOTERM_BP_FAT	GO:0006446~regulation of translational initiation	5	1.82482	0.00637573	EIF4B, EIF4EBP1, EIF4H, EIF3E, HSPB1	247	41	13528	6.67917	0.999942	0.137471	10.102
GOTERM_BP_FAT	GO:0055114~oxidation reduction	22	8.0292	0.00645601	NDUFB4, HSD17B10, LDHA, PTGR1, NDUFB7, TXN2, CYC1, PRDX5, IDH3B, PRDX2, UQCRFS1, PRDX1, PYCR1, NDUFS5, PYCR2, UQCRH, TXN, FASN, HSD11B2, GAPDH, MDH2, IMPDH2	247	639	13528	1.88564	0.999949	0.137154	10.2229
GOTERM_BP_FAT	GO:0006006~glucose metabolic process	9	3.28467	0.00689148	TPI1, LDHA, ATF4, PGAM1, PGK1, GAPDH, MYC, MDH2, ENO1	247	153	13528	3.22172	0.999974	0.143746	10.8758
GOTERM_BP_FAT	GO:0031401~positive regulation of protein modification process	10	3.64964	0.00725403	CCNB1, PSMB5, CCND1, PSMD13, PSMC4, PSMB3, UBB, PSMA7, STUB1, UBA52	247	187	13528	2.92884	0.999985	0.14872	11.416
GOTERM_BP_FAT	GO:0051248~negative regulation of protein metabolic process	10	3.64964	0.00725403	PSMB5, HSP90AB1, EIF4EBP1, PSMD13, PSMC4, PSMB3, EIF3E, UBB, PSMA7, UBA52	247	187	13528	2.92884	0.999985	0.14872	11.416
GOTERM_BP_FAT	GO:0051726~regulation of cell cycle	14	5.10949	0.00770969	AURKAIP1, TP53, RPS15A, RPL24, RCC1, CCNB1, CCND1, CDKN1A, PRMT5, NPM1, CKS2, PES1, MYC, HSPA8	247	331	13528	2.31652	0.999993	0.155257	12.0906
GOTERM_BP_FAT	GO:0006596~polyamine biosynthetic process	3	1.09489	0.00857854	ODC1, OAZ1, SRM	247	8	13528	20.5385	0.999998	0.16904	13.3634
GOTERM_BP_FAT	GO:0034654~nucleobase, nucleoside, nucleotide and nucleic acid biosynthetic process	10	3.64964	0.00883766	ATP5D, ATP1B1, NME2, ATP2A2, NME1, ATP5B, NPPC, ATP5G1, PNP, IMPDH2, APRT	247	193	13528	2.83778	0.999999	0.171503	13.7397
GOTERM_BP_FAT	GO:0034404~nucleobase, nucleoside and nucleotide biosynthetic process	10	3.64964	0.00883766	ATP5D, ATP1B1, NME2, ATP2A2, NME1, ATP5B, NPPC, ATP5G1, PNP, IMPDH2, APRT	247	193	13528	2.83778	0.999999	0.171503	13.7397
GOTERM_BP_FAT	GO:0006413~translational initiation	5	1.82482	0.00886623	EIF3D, RPS3AP5, RPS3A, EIF3E, RPS5, RPS3	247	45	13528	6.08547	0.999999	0.169865	13.781
GOTERM_BP_FAT	GO:0006119~oxidative phosphorylation	7	2.55474	0.00891058	ATP5D, NDUFB4, NDUFS5, NDUFB7, UQCRH, ATP5B, ATP5G1	247	98	13528	3.91209	0.999999	0.168542	13.8453
GOTERM_BP_FAT	GO:0001666~response to hypoxia	8	2.91971	0.0112582	ATP1B1, TFRC, TXN2, NPPC, HSD11B2, BNIP3, MB, DDIT4	247	134	13528	3.2698	1	0.205757	17.1808
GOTERM_BP_FAT	GO:0000302~response to reactive oxygen species	6	2.18978	0.0117372	TXNIP, PRDX5, PRDX2, PRDX1, PARK7, MB	247	75	13528	4.38154	1	0.21106	17.8464
GOTERM_BP_FAT	GO:0051789~response to protein stimulus	7	2.55474	0.0133823	HSP90AB1, CCND1, HSP90AA1, HSPB1, HSPD1, HSPA1B, HSPA8	247	107	13528	3.58303	1	0.23433	20.094
GOTERM_BP_FAT	GO:0010605~negative regulation of macromolecule metabolic process	23	8.39416	0.0145416	HSP90AB1, HMGB1, EID1, PHB, TP53, BNIP3, CBX3, PSMA7, RPS3, PSMB5, EIF4EBP1, PSMD13, PSMC4, PSMB3, RPS14, EIF3E, PHB2, NPM1, NPPC, UBB, MYC, UBA52, ENO1	247	734	13528	1.7162	1	0.249174	21.6429
GOTERM_BP_FAT	GO:0016052~carbohydrate catabolic process	7	2.55474	0.0145565	TPI1, LDHA, PGAM1, PGK1, GAPDH, MDH2, ENO1	247	109	13528	3.51729	1	0.246666	21.6626
GOTERM_BP_FAT	GO:0010608~posttranscriptional regulation of gene expression	10	3.64964	0.0151933	EIF4B, EIF4EBP1, EIF4H, SERBP1, EIF3E, HSPB1, EIF5A, HSPD1, RPS5, YBX1	247	211	13528	2.5957	1	0.253258	22.5012
GOTERM_BP_FAT	GO:0006595~polyamine metabolic process	3	1.09489	0.0162562	ODC1, OAZ1, SRM	247	11	13528	14.9371	1	0.265654	23.8822
GOTERM_BP_FAT	GO:0046902~regulation of mitochondrial membrane permeability	3	1.09489	0.0162562	PPIF, TP53, BNIP3	247	11	13528	14.9371	1	0.265654	23.8822
GOTERM_BP_FAT	GO:0006164~purine nucleotide biosynthetic process	8	2.91971	0.0185569	ATP5D, ATP1B1, NME2, ATP2A2, NME1, ATP5B, NPPC, ATP5G1, IMPDH2	247	148	13528	2.9605	1	0.294313	26.7926
GOTERM_BP_FAT	GO:0042542~response to hydrogen peroxide	5	1.82482	0.0187319	TXNIP, PRDX2, PRDX1, PARK7, MB	247	56	13528	4.89011	1	0.293663	27.0097
GOTERM_BP_FAT	GO:0044092~negative regulation of molecular function	13	4.74453	0.019333	TP53, PRDX2, PSMA7, RPS3, PSMB5, CDKN1A, PSMD13, PSMC4, NUP62, PSMB3, UBB, HSPA5, UBA52	247	334	13528	2.13174	1	0.298585	27.7505
GOTERM_BP_FAT	GO:0009991~response to extracellular stimulus	10	3.64964	0.0193843	CDKN1A, LDHA, CCND1, HMGCS2, TFRC, TXN2, DAD1, TP53, HSD11B2, HSPA5	247	220	13528	2.48951	1	0.296313	27.8134
GOTERM_BP_FAT	GO:0009152~purine ribonucleotide biosynthetic process	7	2.55474	0.0199704	ATP5D, ATP1B1, NME2, ATP2A2, NME1, ATP5B, ATP5G1, IMPDH2	247	117	13528	3.27679	1	0.300888	28.5284
GOTERM_BP_FAT	GO:0009165~nucleotide biosynthetic process	9	3.28467	0.0205293	ATP5D, ATP1B1, NME2, ATP2A2, NME1, ATP5B, NPPC, ATP5G1, PNP, IMPDH2	247	186	13528	2.65012	1	0.304995	29.204
GOTERM_BP_FAT	GO:0044093~positive regulation of molecular function	19	6.93431	0.0210852	TP53, LPAR3, PRDX2, PSMA7, RPS3, PSMB5, CCNB1, NME2, CCND1, PSMD13, PSMC4, NME1, PSMB3, NPM1, EDF1, SHC1, UBB, HSPD1, MYC, UBA52	247	586	13528	1.77579	1	0.308953	29.8701
GOTERM_BP_FAT	GO:0031400~negative regulation of protein modification process	7	2.55474	0.0215121	PSMB5, PSMD13, PSMC4, PSMB3, UBB, PSMA7, UBA52	247	119	13528	3.22172	1	0.311247	30.3775
GOTERM_BP_FAT	GO:0007569~cell aging	4	1.45985	0.0216907	HSD17B10, NUP62, NPM1, TP53	247	33	13528	6.63869	1	0.310525	30.5888
GOTERM_BP_FAT	GO:0006461~protein complex assembly	17	6.20438	0.0222888	HSD17B10, TCP1, HSP90AA1, FKBP4, TP53, MKI67IP, HMGA1, MIF, NDUFS5, UQCRH, NPM1, TCEB2, VAMP3, HSPD1, TUBA1B, MYC, DCTPP1	247	505	13528	1.84372	1	0.314766	31.292
GOTERM_BP_FAT	GO:0070271~protein complex biogenesis	17	6.20438	0.0222888	HSD17B10, TCP1, HSP90AA1, FKBP4, TP53, MKI67IP, HMGA1, MIF, NDUFS5, UQCRH, NPM1, TCEB2, VAMP3, HSPD1, TUBA1B, MYC, DCTPP1	247	505	13528	1.84372	1	0.314766	31.292
GOTERM_BP_FAT	GO:0010033~response to organic substance	22	8.0292	0.0228482	TXNIP, HSP90AB1, HSP90AA1, TXN2, PRDX2, HSPA1B, UQCRFS1, NME2, EIF4EBP1, CDKN1A, CCND1, NUP62, HMGCS2, TFRC, NME1, NPPC, HSPB1, HSD11B2, SHC1, HSPD1, MYC, HSPA8, MB	247	721	13528	1.67118	1	0.318445	31.9436
GOTERM_BP_FAT	GO:0034976~response to endoplasmic reticulum stress	4	1.45985	0.0234778	CCND1, ATF4, TP53, HSPA5	247	34	13528	6.44344	1	0.32283	32.6701
GOTERM_BP_FAT	GO:0019318~hexose metabolic process	9	3.28467	0.0242873	TPI1, LDHA, ATF4, PGAM1, PGK1, GAPDH, MYC, MDH2, ENO1	247	192	13528	2.56731	1	0.329109	33.5933
GOTERM_BP_FAT	GO:0006984~ER-nuclear signaling pathway	4	1.45985	0.0253425	CCND1, ATP2A2, TP53, HSPA5	247	35	13528	6.25934	1	0.337892	34.779
GOTERM_BP_FAT	GO:0009260~ribonucleotide biosynthetic process	7	2.55474	0.0257135	ATP5D, ATP1B1, NME2, ATP2A2, NME1, ATP5B, ATP5G1, IMPDH2	247	124	13528	3.09181	1	0.339055	35.1911
GOTERM_BP_FAT	GO:0006268~DNA unwinding during replication	3	1.09489	0.0259519	HMGB1, MCM7, HMGA1	247	14	13528	11.7363	1	0.338778	35.4546
GOTERM_BP_FAT	GO:0043085~positive regulation of catalytic activity	17	6.20438	0.0282837	TP53, LPAR3, PRDX2, PSMA7, RPS3, PSMB5, CCNB1, CCND1, PSMD13, PSMC4, PSMB3, NPM1, SHC1, UBB, HSPD1, MYC, UBA52	247	520	13528	1.79053	1	0.360306	37.9797
GOTERM_BP_FAT	GO:0031668~cellular response to extracellular stimulus	5	1.82482	0.0289864	CDKN1A, LDHA, TXN2, TP53, HSPA5	247	64	13528	4.27885	1	0.364538	38.7222
GOTERM_BP_FAT	GO:0043086~negative regulation of catalytic activity	11	4.0146	0.0300554	PSMB5, CDKN1A, PSMD13, NUP62, PSMC4, PSMB3, TP53, UBB, HSPA5, PSMA7, UBA52	247	277	13528	2.17495	1	0.372292	39.8359
GOTERM_BP_FAT	GO:0010038~response to metal ion	7	2.55474	0.030429	TXNIP, ATP5D, ACTG1, CCND1, NPC1, TFRC, MT1X	247	129	13528	2.97197	1	0.37305	40.2205
GOTERM_BP_FAT	GO:0046907~intracellular transport	20	7.29927	0.0313791	ATP5D, HSP90AA1, RAN, SLC25A6, TP53, TIMM10, EIF5A, BNIP3, PPIF, NPC1, RPL23, ATP2A2, TOMM5, TXNDC5, RPS15, NPM1, TOMM20, KPNA2, RAMP1, HSPA8	247	657	13528	1.66725	1	0.379345	41.1885
GOTERM_BP_FAT	GO:0045333~cellular respiration	6	2.18978	0.0318968	NDUFB4, NDUFS5, NDUFB7, UQCRH, IDH3B, MDH2	247	97	13528	3.38779	1	0.381383	41.7096
GOTERM_BP_FAT	GO:0017038~protein import	7	2.55474	0.0324637	RPL23, TOMM5, RAN, TIMM10, TP53, TOMM20, KPNA2	247	131	13528	2.9266	1	0.383838	42.2753
GOTERM_BP_FAT	GO:0009206~purine ribonucleoside triphosphate biosynthetic process	6	2.18978	0.0331326	ATP5D, ATP1B1, NME2, ATP2A2, NME1, ATP5B, ATP5G1	247	98	13528	3.35322	1	0.387181	42.9362
GOTERM_BP_FAT	GO:0009145~purine nucleoside triphosphate biosynthetic process	6	2.18978	0.0343979	ATP5D, ATP1B1, NME2, ATP2A2, NME1, ATP5B, ATP5G1	247	99	13528	3.31935	1	0.395841	44.1669
GOTERM_BP_FAT	GO:0009201~ribonucleoside triphosphate biosynthetic process	6	2.18978	0.0343979	ATP5D, ATP1B1, NME2, ATP2A2, NME1, ATP5B, ATP5G1	247	99	13528	3.31935	1	0.395841	44.1669
GOTERM_BP_FAT	GO:0046496~nicotinamide nucleotide metabolic process	4	1.45985	0.0358217	TPI1, IDH3B, PNP, MDH2	247	40	13528	5.47692	1	0.405629	45.5219
GOTERM_BP_FAT	GO:0006769~nicotinamide metabolic process	4	1.45985	0.0358217	TPI1, IDH3B, PNP, MDH2	247	40	13528	5.47692	1	0.405629	45.5219
GOTERM_BP_FAT	GO:0033753~establishment of ribosome localization	2	0.729927	0.0360397	RPS15, NPM1	247	2	13528	54.7692	1	0.404664	45.7266
GOTERM_BP_FAT	GO:0033750~ribosome localization	2	0.729927	0.0360397	RPS15, NPM1	247	2	13528	54.7692	1	0.404664	45.7266
GOTERM_BP_FAT	GO:0000056~ribosomal small subunit export from nucleus	2	0.729927	0.0360397	RPS15, NPM1	247	2	13528	54.7692	1	0.404664	45.7266
GOTERM_BP_FAT	GO:0000028~ribosomal small subunit assembly	2	0.729927	0.0360397	RPS14, RPS15	247	2	13528	54.7692	1	0.404664	45.7266
GOTERM_BP_FAT	GO:0000054~ribosome export from nucleus	2	0.729927	0.0360397	RPS15, NPM1	247	2	13528	54.7692	1	0.404664	45.7266
GOTERM_BP_FAT	GO:0031575~G1/S transition checkpoint	3	1.09489	0.0374291	CCND1, TP53, RPL24	247	17	13528	9.66516	1	0.413784	47.0146
GOTERM_BP_FAT	GO:0009132~nucleoside diphosphate metabolic process	3	1.09489	0.0374291	ATP5D, NME2, NME1, ATP5B	247	17	13528	9.66516	1	0.413784	47.0146
GOTERM_BP_FAT	GO:0009820~alkaloid metabolic process	4	1.45985	0.0381463	TPI1, IDH3B, PNP, MDH2	247	41	13528	5.34334	1	0.41699	47.6681
GOTERM_BP_FAT	GO:0009142~nucleoside triphosphate biosynthetic process	6	2.18978	0.0383719	ATP5D, ATP1B1, NME2, ATP2A2, NME1, ATP5B, ATP5G1	247	102	13528	3.22172	1	0.416036	47.8721
GOTERM_BP_FAT	GO:0006417~regulation of translation	7	2.55474	0.0390914	EIF4B, EIF4EBP1, EIF4H, EIF3E, HSPB1, EIF5A, RPS5	247	137	13528	2.79843	1	0.419178	48.5177
GOTERM_BP_FAT	GO:0009150~purine ribonucleotide metabolic process	7	2.55474	0.0402736	ATP5D, ATP1B1, NME2, ATP2A2, NME1, ATP5B, ATP5G1, IMPDH2	247	138	13528	2.77815	1	0.426001	49.5622
GOTERM_BP_FAT	GO:0046651~lymphocyte proliferation	4	1.45985	0.0405462	TP53, PRDX2, HSPD1, IMPDH2	247	42	13528	5.21612	1	0.425388	49.8001
GOTERM_BP_FAT	GO:0019362~pyridine nucleotide metabolic process	4	1.45985	0.0405462	TPI1, IDH3B, PNP, MDH2	247	42	13528	5.21612	1	0.425388	49.8001
GOTERM_BP_FAT	GO:0032392~DNA geometric change	3	1.09489	0.0416127	HMGB1, MCM7, HMGA1	247	18	13528	9.12821	1	0.431072	50.7212
GOTERM_BP_FAT	GO:0009303~rRNA transcription	3	1.09489	0.0416127	TP53, NPM3, MKI67IP	247	18	13528	9.12821	1	0.431072	50.7212
GOTERM_BP_FAT	GO:0032508~DNA duplex unwinding	3	1.09489	0.0416127	HMGB1, MCM7, HMGA1	247	18	13528	9.12821	1	0.431072	50.7212
GOTERM_BP_FAT	GO:0006310~DNA recombination	6	2.18978	0.0426157	RPA1, HMGB1, XRCC6, RUVBL1, HSPD1, HMGA1	247	105	13528	3.12967	1	0.43612	51.5729
GOTERM_BP_FAT	GO:0034599~cellular response to oxidative stress	4	1.45985	0.0430207	PYCR1, PRDX5, PRDX2, PRDX1	247	43	13528	5.09481	1	0.43647	51.9128
GOTERM_BP_FAT	GO:0031399~regulation of protein modification process	11	4.0146	0.0435879	CCNB1, PSMB5, CCND1, PSMD13, PSMC4, PSMB3, UBB, PSMA7, FEM1A, STUB1, UBA52	247	295	13528	2.04224	1	0.438049	52.3851
GOTERM_BP_FAT	GO:0006259~DNA metabolic process	16	5.83942	0.0436233	PTGES3, HMGB1, RAN, PHB, XRCC6, TP53, BNIP3, HMGA1, TK1, RPA1, MCM7, HSPD1, RUVBL1, KPNA2, APEX1, MYC	247	506	13528	1.73183	1	0.43559	52.4145
GOTERM_BP_FAT	GO:0032943~mononuclear cell proliferation	4	1.45985	0.045569	TP53, PRDX2, HSPD1, IMPDH2	247	44	13528	4.97902	1	0.447391	54.001
GOTERM_BP_FAT	GO:0070661~leukocyte proliferation	4	1.45985	0.045569	TP53, PRDX2, HSPD1, IMPDH2	247	44	13528	4.97902	1	0.447391	54.001
GOTERM_BP_FAT	GO:0033365~protein localization in organelle	7	2.55474	0.0505471	RPL23, TOMM5, RAN, TIMM10, TP53, TOMM20, KPNA2	247	146	13528	2.62592	1	0.480118	57.8367
GOTERM_BP_FAT	GO:0005996~monosaccharide metabolic process	9	3.28467	0.0511831	TPI1, LDHA, ATF4, PGAM1, PGK1, GAPDH, MYC, MDH2, ENO1	247	222	13528	2.22037	1	0.481686	58.3045
GOTERM_BP_FAT	GO:0009259~ribonucleotide metabolic process	7	2.55474	0.0519343	ATP5D, ATP1B1, NME2, ATP2A2, NME1, ATP5B, ATP5G1, IMPDH2	247	147	13528	2.60806	1	0.484005	58.8507
GOTERM_BP_FAT	GO:0006163~purine nucleotide metabolic process	8	2.91971	0.0536588	ATP5D, ATP1B1, NME2, ATP2A2, NME1, ATP5B, NPPC, ATP5G1, IMPDH2	247	186	13528	2.35567	1	0.492738	60.0794
GOTERM_BP_FAT	GO:0001836~release of cytochrome c from mitochondria	3	1.09489	0.0551308	CLU, TP53, MYC	247	21	13528	7.82418	1	0.499577	61.1008
GOTERM_BP_FAT	GO:0043281~regulation of caspase activity	5	1.82482	0.0557115	TP53, HSPA5, HSPD1, MYC, RPS3	247	79	13528	3.46641	1	0.500552	61.4969
GOTERM_BP_FAT	GO:0051052~regulation of DNA metabolic process	6	2.18978	0.0569858	NPPC, TP53, SHC1, KPNA2, MYC, RPS3	247	114	13528	2.88259	1	0.505897	62.3529
GOTERM_BP_FAT	GO:0007346~regulation of mitotic cell cycle	7	2.55474	0.0592175	CCND1, AURKAIP1, PRMT5, TP53, RPL24, RCC1, MYC	247	152	13528	2.52227	1	0.517006	63.8092
GOTERM_BP_FAT	GO:0009309~amine biosynthetic process	5	1.82482	0.0600186	ODC1, PYCR1, PYCR2, OAZ1, SRM	247	81	13528	3.38082	1	0.519143	64.3189
GOTERM_BP_FAT	GO:0000377~RNA splicing, via transesterification reactions with bulged adenosine as nucleophile	7	2.55474	0.0607438	PRMT5, U2AF2, PCBP1, SNRPB, SNRPD2, SF3B5, YBX1	247	153	13528	2.50578	1	0.520789	64.7745
GOTERM_BP_FAT	GO:0000375~RNA splicing, via transesterification reactions	7	2.55474	0.0607438	PRMT5, U2AF2, PCBP1, SNRPB, SNRPD2, SF3B5, YBX1	247	153	13528	2.50578	1	0.520789	64.7745
GOTERM_BP_FAT	GO:0000398~nuclear mRNA splicing, via spliceosome	7	2.55474	0.0607438	PRMT5, U2AF2, PCBP1, SNRPB, SNRPD2, SF3B5, YBX1	247	153	13528	2.50578	1	0.520789	64.7745
GOTERM_BP_FAT	GO:0052548~regulation of endopeptidase activity	5	1.82482	0.0622367	TP53, HSPA5, HSPD1, MYC, RPS3	247	82	13528	3.33959	1	0.526938	65.6952
GOTERM_BP_FAT	GO:0009205~purine ribonucleoside triphosphate metabolic process	6	2.18978	0.0623244	ATP5D, ATP1B1, NME2, ATP2A2, NME1, ATP5B, ATP5G1	247	117	13528	2.80868	1	0.524762	65.7486
GOTERM_BP_FAT	GO:0009199~ribonucleoside triphosphate metabolic process	6	2.18978	0.0641648	ATP5D, ATP1B1, NME2, ATP2A2, NME1, ATP5B, ATP5G1	247	118	13528	2.78488	1	0.532749	66.8509
GOTERM_BP_FAT	GO:0006913~nucleocytoplasmic transport	7	2.55474	0.0654621	RPL23, RAN, RPS15, NPM1, TP53, EIF5A, KPNA2	247	156	13528	2.45759	1	0.537453	67.6077
GOTERM_BP_FAT	GO:0006733~oxidoreduction coenzyme metabolic process	4	1.45985	0.0685243	TPI1, IDH3B, PNP, MDH2	247	52	13528	4.21302	1	0.551746	69.3303
GOTERM_BP_FAT	GO:0051169~nuclear transport	7	2.55474	0.0687239	RPL23, RAN, RPS15, NPM1, TP53, EIF5A, KPNA2	247	158	13528	2.42648	1	0.550176	69.4396
GOTERM_BP_FAT	GO:0031667~response to nutrient levels	8	2.91971	0.0693833	CCND1, HMGCS2, TFRC, TXN2, DAD1, TP53, HSD11B2, HSPA5	247	197	13528	2.22413	1	0.551101	69.7979
GOTERM_BP_FAT	GO:0051101~regulation of DNA binding	6	2.18978	0.0698678	NME2, NME1, NPM1, EDF1, PRDX2, APEX1, RPS3	247	121	13528	2.71583	1	0.551081	70.0586
GOTERM_BP_FAT	GO:0006432~phenylalanyl-tRNA aminoacylation	2	0.729927	0.0707855	FARSA, FDXACB1	247	4	13528	27.3846	1	0.553354	70.5467
GOTERM_BP_FAT	GO:0042149~cellular response to glucose starvation	2	0.729927	0.0707855	TP53, HSPA5	247	4	13528	27.3846	1	0.553354	70.5467
GOTERM_BP_FAT	GO:0052547~regulation of peptidase activity	5	1.82482	0.0715349	TP53, HSPA5, HSPD1, MYC, RPS3	247	86	13528	3.18426	1	0.554708	70.9397
GOTERM_BP_FAT	GO:0009144~purine nucleoside triphosphate metabolic process	6	2.18978	0.0718291	ATP5D, ATP1B1, NME2, ATP2A2, NME1, ATP5B, ATP5G1	247	122	13528	2.69357	1	0.553679	71.0926
GOTERM_BP_FAT	GO:0006919~activation of caspase activity	4	1.45985	0.0749434	TP53, HSPD1, MYC, RPS3	247	54	13528	4.05698	1	0.567059	72.6658
GOTERM_BP_FAT	GO:0006511~ubiquitin-dependent protein catabolic process	9	3.28467	0.0750348	CCNB1, PSMB5, PSMD13, PSMC4, PSMB3, UBB, PSMA7, STUB1, UBA52	247	242	13528	2.03687	1	0.564976	72.7108
GOTERM_BP_FAT	GO:0019674~NAD metabolic process	3	1.09489	0.0751502	IDH3B, PNP, MDH2	247	25	13528	6.57231	1	0.563033	72.7674
GOTERM_BP_FAT	GO:0042743~hydrogen peroxide metabolic process	3	1.09489	0.0751502	PRDX2, PRDX1, PARK7	247	25	13528	6.57231	1	0.563033	72.7674
GOTERM_BP_FAT	GO:0008284~positive regulation of cell proliferation	13	4.74453	0.0752215	RPA1, ODC1, NME2, CDKN1A, CCND1, NME1, CLU, NPM1, EIF5A, RPS15A, RPS9, SHC1, MYC, PNP	247	414	13528	1.71981	1	0.560887	72.8023
GOTERM_BP_FAT	GO:0006754~ATP biosynthetic process	5	1.82482	0.0789479	ATP5D, ATP1B1, ATP2A2, ATP5B, ATP5G1	247	89	13528	3.07692	1	0.576653	74.5706
GOTERM_BP_FAT	GO:0042773~ATP synthesis coupled electron transport	4	1.45985	0.0816184	NDUFB4, NDUFS5, NDUFB7, UQCRH	247	56	13528	3.91209	1	0.586814	75.7708
GOTERM_BP_FAT	GO:0043603~cellular amide metabolic process	4	1.45985	0.0816184	TPI1, IDH3B, PNP, MDH2	247	56	13528	3.91209	1	0.586814	75.7708
GOTERM_BP_FAT	GO:0042775~mitochondrial ATP synthesis coupled electron transport	4	1.45985	0.0816184	NDUFB4, NDUFS5, NDUFB7, UQCRH	247	56	13528	3.91209	1	0.586814	75.7708
GOTERM_BP_FAT	GO:0006284~base-excision repair	3	1.09489	0.0858978	HMGB1, TP53, APEX1	247	27	13528	6.08547	1	0.603882	77.5836
GOTERM_BP_FAT	GO:0006351~transcription, DNA-dependent	10	3.64964	0.0860067	ZNF217, TCEB2, TP53, NPM3, BTF3, MKI67IP, APEX1, MYC, CBFB, YBX1	247	292	13528	1.87566	1	0.601899	77.628
GOTERM_BP_FAT	GO:0006172~ADP biosynthetic process	2	0.729927	0.0876878	ATP5D, ATP5B	247	5	13528	21.9077	1	0.606879	78.3034
GOTERM_BP_FAT	GO:0009136~purine nucleoside diphosphate biosynthetic process	2	0.729927	0.0876878	ATP5D, ATP5B	247	5	13528	21.9077	1	0.606879	78.3034
GOTERM_BP_FAT	GO:0042062~long-term strengthening of neuromuscular junction	2	0.729927	0.0876878	UBB, UBA52	247	5	13528	21.9077	1	0.606879	78.3034
GOTERM_BP_FAT	GO:0009180~purine ribonucleoside diphosphate biosynthetic process	2	0.729927	0.0876878	ATP5D, ATP5B	247	5	13528	21.9077	1	0.606879	78.3034
GOTERM_BP_FAT	GO:0009188~ribonucleoside diphosphate biosynthetic process	2	0.729927	0.0876878	ATP5D, ATP5B	247	5	13528	21.9077	1	0.606879	78.3034
GOTERM_BP_FAT	GO:0042026~protein refolding	2	0.729927	0.0876878	HSP90AA1, HSPD1	247	5	13528	21.9077	1	0.606879	78.3034
GOTERM_BP_FAT	GO:0006261~DNA-dependent DNA replication	4	1.45985	0.0885403	RPA1, HMGB1, MCM7, HMGA1	247	58	13528	3.77719	1	0.60816	78.6384
GOTERM_BP_FAT	GO:0016044~membrane organization	12	4.37956	0.088771	HSP90AA1, ATP5B, TP53, TIMM10, BNIP3, PPIF, NPC1, NME2, TFRC, NME1, TXNDC5, VAMP3, HSPA8	247	381	13528	1.72502	1	0.606738	78.7283
GOTERM_BP_FAT	GO:0009141~nucleoside triphosphate metabolic process	6	2.18978	0.0908188	ATP5D, ATP1B1, NME2, ATP2A2, NME1, ATP5B, ATP5G1	247	131	13528	2.50851	1	0.613112	79.5104
GOTERM_BP_FAT	GO:0000387~spliceosomal snRNP biogenesis	3	1.09489	0.0914349	PRMT5, SNRPB, SNRPD2	247	28	13528	5.86813	1	0.613325	79.7403
GOTERM_BP_FAT	GO:0032774~RNA biosynthetic process	10	3.64964	0.091729	ZNF217, TCEB2, TP53, NPM3, BTF3, MKI67IP, APEX1, MYC, CBFB, YBX1	247	296	13528	1.85031	1	0.612185	79.8492
GOTERM_BP_FAT	GO:0043280~positive regulation of caspase activity	4	1.45985	0.0920911	TP53, HSPD1, MYC, RPS3	247	59	13528	3.71317	1	0.611342	79.9826
GOTERM_BP_FAT	GO:0010952~positive regulation of peptidase activity	4	1.45985	0.0920911	TP53, HSPD1, MYC, RPS3	247	59	13528	3.71317	1	0.611342	79.9826
GOTERM_BP_FAT	GO:0043065~positive regulation of apoptosis	13	4.74453	0.0940864	TXNIP, TP53, BNIP3, EIF5A, RPS6, PRDX1, RPS3, CDKN1A, RPS3AP5, RPS3A, UBB, HSPD1, MYC, UBA52	247	430	13528	1.65581	1	0.617268	80.7026
GOTERM_BP_FAT	GO:0051168~nuclear export	4	1.45985	0.0957001	RAN, RPS15, NPM1, EIF5A	247	60	13528	3.65128	1	0.621509	81.267
GOTERM_BP_FAT	GO:0043068~positive regulation of programmed cell death	13	4.74453	0.0975869	TXNIP, TP53, BNIP3, EIF5A, RPS6, PRDX1, RPS3, CDKN1A, RPS3AP5, RPS3A, UBB, HSPD1, MYC, UBA52	247	433	13528	1.64434	1	0.626747	81.9073
GOTERM_BP_FAT	GO:0006605~protein targeting	8	2.91971	0.0979399	RPL23, TOMM5, RAN, TIMM10, TP53, TOMM20, EIF5A, KPNA2	247	215	13528	2.03792	1	0.625839	82.0247
GOTERM_BP_FAT	GO:0031329~regulation of cellular catabolic process	4	1.45985	0.0993662	HSP90AB1, NPC1, PGAM1, STUB1	247	61	13528	3.59142	1	0.629152	82.4921

## Sheet: down Nx MB468 GOs
Category	Term	Count	%	PValue	Genes	List Total	Pop Hits	Pop Total	Fold Enrichment	Bonferroni	Benjamini	FDR
GOTERM_BP_FAT	GO:0030036~actin cytoskeleton organization	26	6.14657	5.0061e-10	CXCL1, LIMA1, TLN1, PDLIM7, PLEK2, PDGFB, CNN3, ACTN4, FERMT2, FSCN1, ACTN1, NEDD9, ARPC5, MYH9, ITGB1, TPM1, FLNA, ACTG1, PFN1, EZR, RHOA, CNN2, CAP1, TRIP10, DBN1, PLS3	341	226	13528	4.56398	1.22399e-06	1.22399e-06	8.80894e-07
GOTERM_BP_FAT	GO:0007010~cytoskeleton organization	36	8.51064	1.22703e-09	CXCL1, TLN1, CAV1, LIMA1, PDLIM7, PLEK2, CNN3, PDGFB, FERMT2, NEDD9, ARPC5, ITGB1, TPM1, ACTG1, PFN1, EZR, KRT7, KRT8, NPM1, RHOA, CNN2, CAP1, TRIP10, KRT86, PLS3, ACTN4, RAN, FSCN1, ACTN1, MYH9, FLNA, LAMA5, LASP1, CKS2, DBN1, GADD45A	341	436	13528	3.27563	3.00008e-06	1.50004e-06	2.15913e-06
GOTERM_BP_FAT	GO:0030029~actin filament-based process	26	6.14657	1.93268e-09	CXCL1, LIMA1, TLN1, PDLIM7, PLEK2, PDGFB, CNN3, ACTN4, FERMT2, FSCN1, ACTN1, NEDD9, ARPC5, MYH9, ITGB1, TPM1, FLNA, ACTG1, PFN1, EZR, RHOA, CNN2, CAP1, TRIP10, DBN1, PLS3	341	241	13528	4.27992	4.7254e-06	1.57514e-06	3.40083e-06
GOTERM_BP_FAT	GO:0006928~cell motion	32	7.56501	1.17154e-06	TLN1, TNF, CCL2, PDGFB, TNFRSF12A, ATP5B, KITLG, L1CAM, ARPC5, ITGB1, TPM1, VCL, TGFB2, ACTG1, SAA2, DNAJA1, CAP1, MSN, THBS1, ACTB, ICAM1, IL8, ANXA1, MYH9, ARPC1B, TNS3, HIF1A, ID1, LAMA5, ETS1, CXCL16, HSPB1	341	475	13528	2.67261	0.00286032	0.000715849	0.00206147
GOTERM_BP_FAT	GO:0051270~regulation of cell motion	19	4.49173	1.79393e-06	EGFR, ICAM1, ACTN4, PDGFB, EDN1, F2RL1, ACTN1, JAG1, TPM1, TGFB2, VCL, HIF1A, ETS1, LAMA5, CXCL16, F3, LAMB1, THBS1, IGFBP3	341	193	13528	3.90549	0.00437656	0.000876849	0.00315663
GOTERM_BP_FAT	GO:0070482~response to oxygen levels	16	3.78251	2.58369e-06	CAV1, ATP1B1, CCL2, PDGFB, ACTN4, IL18, EDN1, EGLN3, PDLIM1, CAPN2, TGFB2, CDKN1A, HIF1A, SERPINA1, THBS1, MB	341	141	13528	4.50174	0.00629723	0.0010523	0.00454628
GOTERM_BP_FAT	GO:0001525~angiogenesis	16	3.78251	4.73485e-06	IL8, TNFRSF12A, ATP5B, IL18, EDN1, JAG1, MYH9, NCL, ANXA2, TGFB2, HIF1A, ID1, LAMA5, THBS1, TNFAIP2, CYR61	341	148	13528	4.28882	0.01151	0.00165245	0.00833131
GOTERM_BP_FAT	GO:0051272~positive regulation of cell motion	13	3.07329	6.11351e-06	EGFR, ICAM1, HIF1A, ACTN4, PDGFB, ETS1, CXCL16, F3, EDN1, F2RL1, LAMB1, THBS1, TGFB2	341	98	13528	5.26255	0.0148364	0.0018667	0.010757
GOTERM_BP_FAT	GO:0001666~response to hypoxia	15	3.5461	6.89863e-06	CAV1, ATP1B1, CCL2, PDGFB, ACTN4, IL18, EDN1, EGLN3, PDLIM1, CAPN2, TGFB2, HIF1A, SERPINA1, THBS1, MB	341	134	13528	4.44085	0.0167258	0.00187238	0.0121384
GOTERM_BP_FAT	GO:0032268~regulation of cellular protein metabolic process	30	7.0922	9.3929e-06	HSP90AB1, CAV1, TNF, PDGFB, EDN1, NFKBIA, KITLG, EIF5A, PSMA7, TIMP1, LIF, SET, PSMB3, KRT7, ITGAV, THBS1, EGFR, MAGOH, FBXO2, PKN1, CDC20, PSMA2, EIF4G2, CCND1, PSMC4, EIF4H, HSPB1, IGFBP3, CBS, IL22RA2	341	474	13528	2.51086	0.022704	0.00229394	0.0165268
GOTERM_BP_FAT	GO:0051017~actin filament bundle formation	7	1.65485	9.51015e-06	LIMA1, EZR, ACTN4, FSCN1, RHOA, ACTN1, NEDD9	341	21	13528	13.2239	0.0229842	0.00211162	0.0167331
GOTERM_BP_FAT	GO:0050900~leukocyte migration	10	2.36407	1.11812e-05	ICAM1, TNF, CCL2, SAA2, IL8, PDGFB, CXCL16, MSN, MYH9, TGFB2	341	57	13528	6.95992	0.0269679	0.00227559	0.0196731
GOTERM_BP_FAT	GO:0006916~anti-apoptosis	18	4.25532	1.77588e-05	YWHAZ, TNF, CCL2, ANXA1, NFKBIA, HSPA1A, HSPA1B, BIRC3, AMIGO2, PEA15, SQSTM1, F3, TXNDC5, NPM1, HSPB1, GLO1, TNFAIP3, THBS1, API5	341	206	13528	3.46645	0.0424915	0.00333448	0.0312445
GOTERM_BP_FAT	GO:0030334~regulation of cell migration	16	3.78251	2.36451e-05	EGFR, ICAM1, PDGFB, F2RL1, EDN1, JAG1, TPM1, TGFB2, VCL, HIF1A, LAMA5, CXCL16, F3, LAMB1, THBS1, IGFBP3	341	169	13528	3.75589	0.0561735	0.00412098	0.0415987
GOTERM_BP_FAT	GO:0040012~regulation of locomotion	17	4.01891	2.78111e-05	EGFR, ICAM1, PDGFB, IL8, F2RL1, EDN1, JAG1, TPM1, TGFB2, VCL, HIF1A, LAMA5, CXCL16, F3, LAMB1, THBS1, IGFBP3	341	192	13528	3.51259	0.0657387	0.00452302	0.0489263
GOTERM_BP_FAT	GO:0048870~cell motility	22	5.20095	3.29027e-05	ICAM1, TNF, CCL2, PDGFB, IL8, TNFRSF12A, ATP5B, KITLG, MYH9, ITGB1, TGFB2, TNS3, HIF1A, SAA2, ID1, ETS1, LAMA5, CXCL16, DNAJA1, CAP1, MSN, THBS1	341	307	13528	2.84291	0.0772974	0.0050154	0.057881
GOTERM_BP_FAT	GO:0051674~localization of cell	22	5.20095	3.29027e-05	ICAM1, TNF, CCL2, PDGFB, IL8, TNFRSF12A, ATP5B, KITLG, MYH9, ITGB1, TGFB2, TNS3, HIF1A, SAA2, ID1, ETS1, LAMA5, CXCL16, DNAJA1, CAP1, MSN, THBS1	341	307	13528	2.84291	0.0772974	0.0050154	0.057881
GOTERM_BP_FAT	GO:0040017~positive regulation of locomotion	12	2.83688	3.4222e-05	EGFR, ICAM1, HIF1A, IL8, PDGFB, CXCL16, F3, EDN1, F2RL1, LAMB1, THBS1, TGFB2	341	98	13528	4.85774	0.0802692	0.00490992	0.0602013
GOTERM_BP_FAT	GO:0007155~cell adhesion	37	8.74704	3.6072e-05	CCL2, TNF, TNFRSF12A, TNC, FERMT2, ITGB4, KITLG, NEDD9, BCAM, L1CAM, IL32, ITGB1, VCL, LAMB3, EZR, ITGAV, TGFBI, RHOA, ZYX, MSN, LAMB1, THBS1, LOXL2, CYR61, EGFR, ICAM1, BMP1, OLR1, ACTN1, ITGA3, MYH9, AMIGO2, ATP2A2, LAMA5, GPR56, CLDN1, LAMC2	341	700	13528	2.09693	0.0844201	0.00488788	0.0634548
GOTERM_BP_FAT	GO:0022610~biological adhesion	37	8.74704	3.63244e-05	CCL2, TNF, TNFRSF12A, TNC, FERMT2, ITGB4, KITLG, NEDD9, BCAM, L1CAM, IL32, ITGB1, VCL, LAMB3, EZR, ITGAV, TGFBI, RHOA, ZYX, MSN, LAMB1, THBS1, LOXL2, CYR61, EGFR, ICAM1, BMP1, OLR1, ACTN1, ITGA3, MYH9, AMIGO2, ATP2A2, LAMA5, GPR56, CLDN1, LAMC2	341	701	13528	2.09393	0.084985	0.00466356	0.0638987
GOTERM_BP_FAT	GO:0030155~regulation of cell adhesion	14	3.30969	4.11139e-05	ICAM1, TNF, IL8, ATP5B, IL18, L1CAM, FXYD5, TPM1, TGFB2, SAA2, LAMA5, TGFBI, THBS1, CYR61	341	137	13528	4.05403	0.095638	0.00501366	0.072321
GOTERM_BP_FAT	GO:0001568~blood vessel development	19	4.49173	4.80802e-05	CAV1, IL8, TNFRSF12A, ATP5B, IL18, EDN1, JAG1, MYH9, NCL, ANXA2, TGFB2, HIF1A, ID1, LAMA5, ITGAV, DHCR7, THBS1, TNFAIP2, CYR61	341	245	13528	3.07657	0.110912	0.0055824	0.0845701
GOTERM_BP_FAT	GO:0007159~leukocyte adhesion	7	1.65485	5.69036e-05	ICAM1, EZR, TNF, OLR1, L1CAM, MSN, ITGB1	341	28	13528	9.91789	0.129888	0.00630428	0.100083
GOTERM_BP_FAT	GO:0010627~regulation of protein kinase cascade	19	4.49173	5.93301e-05	CAV1, TNF, LGALS1, EDN1, UBE2V1, PKN1, WLS, TIMP2, FLNA, TGFB2, LIF, IKBKE, SQSTM1, F3, RHOA, TNFAIP3, PHLDA3, IL22RA2, CBS	341	249	13528	3.02715	0.135035	0.00628739	0.104348
GOTERM_BP_FAT	GO:0001944~vasculature development	19	4.49173	6.54596e-05	CAV1, IL8, TNFRSF12A, ATP5B, IL18, EDN1, JAG1, MYH9, NCL, ANXA2, TGFB2, HIF1A, ID1, LAMA5, ITGAV, DHCR7, THBS1, TNFAIP2, CYR61	341	251	13528	3.00303	0.147902	0.00664673	0.115123
GOTERM_BP_FAT	GO:0016477~cell migration	20	4.72813	7.18546e-05	ICAM1, TNF, CCL2, PDGFB, IL8, TNFRSF12A, ATP5B, KITLG, MYH9, ITGB1, TGFB2, TNS3, HIF1A, SAA2, ID1, LAMA5, CXCL16, CAP1, MSN, THBS1	341	276	13528	2.87475	0.161123	0.00700299	0.126363
GOTERM_BP_FAT	GO:0007015~actin filament organization	10	2.36407	7.5989e-05	LIMA1, EZR, ACTN4, FSCN1, RHOA, ACTN1, NEDD9, DBN1, PLS3, FLNA	341	72	13528	5.50994	0.16956	0.00712068	0.133629
GOTERM_BP_FAT	GO:0030335~positive regulation of cell migration	11	2.60047	7.69875e-05	EGFR, ICAM1, HIF1A, PDGFB, CXCL16, F3, EDN1, F2RL1, LAMB1, THBS1, TGFB2	341	89	13528	4.90323	0.171586	0.00694767	0.135384
GOTERM_BP_FAT	GO:0042127~regulation of cell proliferation	39	9.21986	8.32929e-05	CXCL1, CNBP, CAV1, CCL2, TNF, PDGFB, IL18, EDN1, EGLN3, MMP7, NFKBIA, KITLG, EIF5A, JAG1, TIMP2, ITGB1, PNP, TGFB2, TIMP1, LIF, RPA1, KRT5, DHCR7, NPM1, LAMB1, THBS1, FOSL1, EGFR, IL8, ANXA1, TNS3, CDKN1A, CCND1, HIF1A, ETS1, LAMA5, F3, BTG3, IGFBP3	341	787	13528	1.96593	0.18426	0.00724717	0.146464
GOTERM_BP_FAT	GO:0048514~blood vessel morphogenesis	17	4.01891	8.69905e-05	CAV1, IL8, TNFRSF12A, ATP5B, IL18, EDN1, JAG1, MYH9, NCL, ANXA2, TGFB2, HIF1A, ID1, LAMA5, THBS1, TNFAIP2, CYR61	341	211	13528	3.19629	0.191602	0.00730769	0.152962
GOTERM_BP_FAT	GO:0043066~negative regulation of apoptosis	23	5.43735	9.02102e-05	EGFR, YWHAZ, TNF, CCL2, ANXA1, NFKBIA, HSPA1A, HSPA1B, BIRC3, AMIGO2, PEA15, CDKN1A, KRT18, SQSTM1, F3, TXNDC5, NPM1, RHOA, HSPB1, GLO1, HSPD1, TNFAIP3, THBS1, API5	341	354	13528	2.57753	0.197942	0.0073255	0.158619
GOTERM_BP_FAT	GO:0043069~negative regulation of programmed cell death	23	5.43735	0.00011194	EGFR, YWHAZ, TNF, CCL2, ANXA1, NFKBIA, HSPA1A, HSPA1B, BIRC3, AMIGO2, PEA15, CDKN1A, KRT18, SQSTM1, F3, TXNDC5, NPM1, RHOA, HSPB1, GLO1, HSPD1, TNFAIP3, THBS1, API5	341	359	13528	2.54163	0.239446	0.00879043	0.196791
GOTERM_BP_FAT	GO:0060548~negative regulation of cell death	23	5.43735	0.00011558	EGFR, YWHAZ, TNF, CCL2, ANXA1, NFKBIA, HSPA1A, HSPA1B, BIRC3, AMIGO2, PEA15, CDKN1A, KRT18, SQSTM1, F3, TXNDC5, NPM1, RHOA, HSPB1, GLO1, HSPD1, TNFAIP3, THBS1, API5	341	360	13528	2.53457	0.246187	0.00879269	0.203185
GOTERM_BP_FAT	GO:0007398~ectoderm development	16	3.78251	0.000153643	KRT6B, UGCG, ANXA1, KRT10, JAG1, KRT34, TGFB2, FOXQ1, LAMB3, CST6, ATP2A2, KRT5, KRT17, LAMA5, LAMC2, IVL	341	199	13528	3.18967	0.313181	0.0113198	0.270011
GOTERM_BP_FAT	GO:0051050~positive regulation of transport	17	4.01891	0.000165451	CAV1, TNF, ACTN4, C3, GLUD1, EDN1, NFKBIA, PINK1, CD63, FLNA, TGFB2, INHBB, SAA2, RHOA, PYCARD, PDZK1, CALM2	341	223	13528	3.02429	0.332731	0.0118284	0.290736
GOTERM_BP_FAT	GO:0010035~response to inorganic substance	16	3.78251	0.000212871	EGFR, ACTB, CAV1, PXDN, OLR1, TPM1, ACTG1, CCND1, CDKN1A, SLC1A3, PRDX6, SERPINA1, THBS1, FOSL1, CALM2, MB	341	205	13528	3.09632	0.405791	0.0147621	0.373915
GOTERM_BP_FAT	GO:0008544~epidermis development	15	3.5461	0.000229962	UGCG, ANXA1, KRT10, JAG1, KRT34, TGFB2, FOXQ1, LAMB3, CST6, ATP2A2, KRT5, KRT17, LAMA5, LAMC2, IVL	341	184	13528	3.23409	0.430115	0.0154987	0.403879
GOTERM_BP_FAT	GO:0030193~regulation of blood coagulation	7	1.65485	0.000248359	CAV1, PDGFB, F3, EDN1, F2RL1, THBS1, ANXA2	341	36	13528	7.71391	0.455187	0.0162799	0.436123
GOTERM_BP_FAT	GO:0042981~regulation of apoptosis	38	8.98345	0.000269066	YWHAZ, TNF, CCL2, NFKBIA, EIF5A, CD70, HSPA1A, HSPA1B, TGFB2, PEA15, SQSTM1, NPM1, PYCARD, RHOA, GLO1, THBS1, PHLDA3, FOSL1, API5, EGFR, ACTN4, LGALS1, ANXA1, ACTN1, MAL, BIRC3, PLEKHF1, AMIGO2, CDKN1A, KRT18, RPS3AP5, ETS1, TXNDC5, F3, HSPB1, CTSB, HSPD1, TNFAIP3, IGFBP3	341	804	13528	1.87502	0.48209	0.0171655	0.472403
GOTERM_BP_FAT	GO:0043067~regulation of programmed cell death	38	8.98345	0.000326209	YWHAZ, TNF, CCL2, NFKBIA, EIF5A, CD70, HSPA1A, HSPA1B, TGFB2, PEA15, SQSTM1, NPM1, PYCARD, RHOA, GLO1, THBS1, PHLDA3, FOSL1, API5, EGFR, ACTN4, LGALS1, ANXA1, ACTN1, MAL, BIRC3, PLEKHF1, AMIGO2, CDKN1A, KRT18, RPS3AP5, ETS1, TXNDC5, F3, HSPB1, CTSB, HSPD1, TNFAIP3, IGFBP3	341	812	13528	1.85655	0.549642	0.0202464	0.57246
GOTERM_BP_FAT	GO:0010941~regulation of cell death	38	8.98345	0.000348845	YWHAZ, TNF, CCL2, NFKBIA, EIF5A, CD70, HSPA1A, HSPA1B, TGFB2, PEA15, SQSTM1, NPM1, PYCARD, RHOA, GLO1, THBS1, PHLDA3, FOSL1, API5, EGFR, ACTN4, LGALS1, ANXA1, ACTN1, MAL, BIRC3, PLEKHF1, AMIGO2, CDKN1A, KRT18, RPS3AP5, ETS1, TXNDC5, F3, HSPB1, CTSB, HSPD1, TNFAIP3, IGFBP3	341	815	13528	1.84972	0.573897	0.0211011	0.612068
GOTERM_BP_FAT	GO:0051240~positive regulation of multicellular organismal process	17	4.01891	0.000455213	EGFR, CAV1, TNF, CCL2, IL27RA, IL18, EDN1, PINK1, TPM1, TGFB2, HIF1A, SLC1A3, SAA2, F3, PYCARD, HSPD1, THBS1	341	244	13528	2.764	0.67151	0.0267871	0.797993
GOTERM_BP_FAT	GO:0031399~regulation of protein modification process	19	4.49173	0.000487922	EGFR, CAV1, TNF, PDGFB, FBXO2, EDN1, PKN1, KITLG, CDC20, PSMA7, PSMA2, LIF, CCND1, SET, PSMC4, PSMB3, IGFBP3, CBS, IL22RA2	341	295	13528	2.55512	0.696769	0.0280112	0.8551
GOTERM_BP_FAT	GO:0045428~regulation of nitric oxide biosynthetic process	6	1.41844	0.000498455	EGFR, HSP90AB1, ICAM1, CAV1, TNF, EDN1	341	27	13528	8.8159	0.704482	0.0279514	0.873483
GOTERM_BP_FAT	GO:0032507~maintenance of protein location in cell	7	1.65485	0.000515894	TLN1, CAV1, EZR, NFKBIE, GOPC, NFKBIA, FLNA	341	41	13528	6.77319	0.716824	0.0282675	0.903912
GOTERM_BP_FAT	GO:0050818~regulation of coagulation	7	1.65485	0.000515894	CAV1, PDGFB, F3, EDN1, F2RL1, THBS1, ANXA2	341	41	13528	6.77319	0.716824	0.0282675	0.903912
GOTERM_BP_FAT	GO:0006457~protein folding	14	3.30969	0.00053598	CCT7, HSP90AB1, PFDN2, CCT5, TCP1, CCT4, FKBP4, CCT8, DNAJA1, CCT2, CCT3, CCT6A, HSPD1, HSPA8	341	177	13528	3.13786	0.730402	0.0287092	0.93895
GOTERM_BP_FAT	GO:0051051~negative regulation of transport	12	2.83688	0.000599631	LIF, INHBB, PEA15, TNF, NFKBIE, ITGAV, GOPC, EDN1, NFKBIA, THBS1, CALM2, FLNA	341	135	13528	3.52636	0.769277	0.0313784	1.0499
GOTERM_BP_FAT	GO:0010647~positive regulation of cell communication	20	4.72813	0.000667219	EGFR, CAV1, TNF, CCL2, LGALS1, UBE2V1, PINK1, L1CAM, JAG1, WLS, FLNA, TGFB2, LIF, IKBKE, SLC1A3, HIF1A, F3, LANCL2, RHOA, THBS1	341	329	13528	2.41164	0.804441	0.0341253	1.16759
GOTERM_BP_FAT	GO:0008284~positive regulation of cell proliferation	23	5.43735	0.000790034	EGFR, CNBP, TNF, CCL2, PDGFB, IL18, EDN1, EIF5A, KITLG, ITGB1, PNP, TIMP1, TGFB2, RPA1, LIF, TNS3, CCND1, CDKN1A, HIF1A, F3, NPM1, LAMB1, FOSL1	341	414	13528	2.20398	0.855199	0.0394586	1.3811
GOTERM_BP_FAT	GO:0031589~cell-substrate adhesion	10	2.36407	0.000793996	TNFRSF12A, LAMA5, ITGAV, RHOA, ITGB4, ACTN1, BCAM, ITGA3, LAMB1, ITGB1	341	98	13528	4.04812	0.856596	0.0388593	1.38798
GOTERM_BP_FAT	GO:0042692~muscle cell differentiation	11	2.60047	0.000944237	ACTG1, CAST, WNT4, TNC, LGALS1, AGRN, JAG1, MYH9, CAPN2, TPM1, ITGB1	341	121	13528	3.6065	0.900714	0.0451443	1.64856
GOTERM_BP_FAT	GO:0051235~maintenance of location	8	1.89125	0.0010817	TLN1, CAV1, EZR, TNF, NFKBIE, GOPC, NFKBIA, FLNA	341	64	13528	4.95894	0.929078	0.0505627	1.88641
GOTERM_BP_FAT	GO:0006096~glycolysis	7	1.65485	0.00108577	LDHB, LDHA, TPI1, PFKP, BPGM, GAPDH, ENO1	341	47	13528	5.90853	0.929781	0.049797	1.89344
GOTERM_BP_FAT	GO:0001936~regulation of endothelial cell proliferation	6	1.41844	0.00112184	CAV1, HIF1A, CCL2, PDGFB, F3, THBS1	341	32	13528	7.43842	0.935715	0.0504639	1.95576
GOTERM_BP_FAT	GO:0045185~maintenance of protein location	7	1.65485	0.00121506	TLN1, CAV1, EZR, NFKBIE, GOPC, NFKBIA, FLNA	341	48	13528	5.78543	0.948832	0.0535611	2.11665
GOTERM_BP_FAT	GO:0051651~maintenance of location in cell	7	1.65485	0.00121506	TLN1, CAV1, EZR, NFKBIE, GOPC, NFKBIA, FLNA	341	48	13528	5.78543	0.948832	0.0535611	2.11665
GOTERM_BP_FAT	GO:0032570~response to progesterone stimulus	5	1.18203	0.00138077	CAV1, CCL2, THBS1, FOSL1, TGFB2	341	20	13528	9.91789	0.965896	0.0595757	2.40203
GOTERM_BP_FAT	GO:0051789~response to protein stimulus	10	2.36407	0.00148603	HSP90AB1, HSPH1, CCND1, ID1, DNAJA1, HSPB1, HSPA1A, HSPD1, HSPA1B, HSPA8, CYR61	341	107	13528	3.70762	0.973644	0.0628665	2.58289
GOTERM_BP_FAT	GO:0033209~tumor necrosis factor-mediated signaling pathway	4	0.945626	0.0016559	KRT18, TNF, KRT8, PYCARD	341	10	13528	15.8686	0.982613	0.0686205	2.8741
GOTERM_BP_FAT	GO:0045429~positive regulation of nitric oxide biosynthetic process	5	1.18203	0.0016722	EGFR, HSP90AB1, ICAM1, TNF, EDN1	341	21	13528	9.44561	0.983293	0.0681198	2.902
GOTERM_BP_FAT	GO:0006986~response to unfolded protein	8	1.89125	0.00199423	HSP90AB1, HSPH1, CCND1, DNAJA1, HSPB1, HSPA1A, HSPD1, HSPA1B, HSPA8	341	71	13528	4.47003	0.992409	0.0793954	3.45165
GOTERM_BP_FAT	GO:0051130~positive regulation of cellular component organization	13	3.07329	0.00209162	CAV1, TNF, ACTN4, C3, TNFRSF12A, EDN1, EIF5A, CD63, TPM1, TGFB2, NPM1, RHOA, SYNPO	341	181	13528	2.84934	0.99402	0.081784	3.6173
GOTERM_BP_FAT	GO:0030595~leukocyte chemotaxis	6	1.41844	0.00219168	CCL2, SAA2, IL8, PDGFB, CXCL16, TGFB2	341	37	13528	6.43323	0.99532	0.0841871	3.78722
GOTERM_BP_FAT	GO:0006955~immune response	31	7.32861	0.00246626	CXCL1, YWHAZ, PXDN, MICB, MICA, TNF, CCL2, IL27RA, C3, IL18, SUSD2, CD70, IL32, IL7R, PNP, LIF, SQSTM1, THBS1, DEFB1, ICAM1, OLR1, IL8, RELB, HLA-B, TINAGL1, IKBKE, ETS1, CXCL16, SERPINB4, HSPD1, PTMS	341	690	13528	1.78235	0.997612	0.0927871	4.25204
GOTERM_BP_FAT	GO:0051592~response to calcium ion	7	1.65485	0.00247837	EGFR, ACTG1, ACTB, CAV1, CCND1, THBS1, CALM2	341	55	13528	5.04911	0.997682	0.091812	4.2725
GOTERM_BP_FAT	GO:0051248~negative regulation of protein metabolic process	13	3.07329	0.00274097	PSMA2, HSP90AB1, CAV1, SET, PSMC4, PSMB3, ITGAV, CDC20, PSMA7, THBS1, IGFBP3, FLNA, TIMP1	341	187	13528	2.75792	0.998782	0.099547	4.71496
GOTERM_BP_FAT	GO:0060326~cell chemotaxis	6	1.41844	0.00277882	CCL2, SAA2, IL8, PDGFB, CXCL16, TGFB2	341	39	13528	6.10332	0.99889	0.0993801	4.77859
GOTERM_BP_FAT	GO:0006007~glucose catabolic process	7	1.65485	0.00324974	LDHB, LDHA, TPI1, PFKP, BPGM, GAPDH, ENO1	341	58	13528	4.78795	0.99965	0.113598	5.56675
GOTERM_BP_FAT	GO:0044093~positive regulation of molecular function	27	6.38298	0.00362191	CAV1, TNF, PDGFB, EDN1, UBE2V1, KITLG, DUSP12, PSMA7, TPM1, TGFB2, PSMB3, NPM1, PYCARD, CAP1, THBS1, EGFR, ICAM1, ACTN4, PKN1, CDC20, PSMA2, CCND1, HIF1A, PSMC4, F3, HSPD1, CALM2	341	586	13528	1.82787	0.99986	0.12402	6.18526
GOTERM_BP_FAT	GO:0031100~organ regeneration	5	1.18203	0.00378405	LIF, CDKN1A, CCND1, CCL2, GAS6	341	26	13528	7.62915	0.999906	0.127434	6.45354
GOTERM_BP_FAT	GO:0045785~positive regulation of cell adhesion	7	1.65485	0.00385504	TNF, SAA2, L1CAM, THBS1, TPM1, CYR61, TGFB2	341	60	13528	4.62835	0.999921	0.127913	6.57078
GOTERM_BP_FAT	GO:0043549~regulation of kinase activity	19	4.49173	0.00407793	EGFR, CAV1, TNF, PDGFB, EDN1, PKN1, KITLG, DUSP12, APLP2, TGFB2, SPRY2, YWHAG, CCND1, CDKN1A, NPM1, CKS2, THBS1, GADD45A, CBS	341	357	13528	2.11137	0.999954	0.13301	6.93794
GOTERM_BP_FAT	GO:0060341~regulation of cellular localization	15	3.5461	0.00408402	TNF, NFKBIE, GLUD1, EDN1, PINK1, NFKBIA, FLNA, TGFB2, LIF, INHBB, SAA2, GOPC, PYCARD, RHOA, CALM2	341	248	13528	2.39949	0.999955	0.131448	6.94795
GOTERM_BP_FAT	GO:0001932~regulation of protein amino acid phosphorylation	12	2.83688	0.00434947	LIF, EGFR, CAV1, CCND1, TNF, PDGFB, EDN1, PKN1, KITLG, IGFBP3, CBS, IL22RA2	341	173	13528	2.75178	0.999976	0.137589	7.38342
GOTERM_BP_FAT	GO:0008219~cell death	31	7.32861	0.00445765	TNFRSF21, MICB, MICA, TNF, TNFRSF12A, EGLN3, NFKBIA, L1CAM, TGFB2, DAPL1, PEA15, SQSTM1, KRT8, PYCARD, THBS1, PHLDA3, API5, PHLDA2, OLR1, LGALS1, OPTN, BIRC3, VDAC1, PLEKHF1, EIF4G2, KRT18, F3, HSPB1, HSPD1, TNFAIP3, GADD45A	341	719	13528	1.71046	0.999982	0.138977	7.56033
GOTERM_BP_FAT	GO:0051220~cytoplasmic sequestering of protein	4	0.945626	0.00466155	NFKBIE, GOPC, NFKBIA, FLNA	341	14	13528	11.3347	0.999989	0.143054	7.89292
GOTERM_BP_FAT	GO:0016265~death	31	7.32861	0.00484239	TNFRSF21, MICB, MICA, TNF, TNFRSF12A, EGLN3, NFKBIA, L1CAM, TGFB2, DAPL1, PEA15, SQSTM1, KRT8, PYCARD, THBS1, PHLDA3, API5, PHLDA2, OLR1, LGALS1, OPTN, BIRC3, VDAC1, PLEKHF1, EIF4G2, KRT18, F3, HSPB1, HSPD1, TNFAIP3, GADD45A	341	724	13528	1.69864	0.999993	0.14636	8.18694
GOTERM_BP_FAT	GO:0051271~negative regulation of cell motion	7	1.65485	0.00491441	ACTN4, PDGFB, ACTN1, THBS1, IGFBP3, TPM1, VCL	341	63	13528	4.40795	0.999994	0.14657	8.30378
GOTERM_BP_FAT	GO:0031032~actomyosin structure organization	5	1.18203	0.0049823	ACTG1, CNN3, CNN2, TPM1, ITGB1	341	28	13528	7.08421	0.999995	0.146662	8.4138
GOTERM_BP_FAT	GO:0043122~regulation of I-kappaB kinase/NF-kappaB cascade	9	2.12766	0.00553236	IKBKE, TNF, SQSTM1, LGALS1, RHOA, UBE2V1, WLS, TNFAIP3, FLNA	341	107	13528	3.33686	0.999999	0.159619	9.30064
GOTERM_BP_FAT	GO:0050921~positive regulation of chemotaxis	5	1.18203	0.00566688	IL8, PDGFB, F3, F2RL1, THBS1	341	29	13528	6.83992	0.999999	0.161286	9.51629
GOTERM_BP_FAT	GO:0001938~positive regulation of endothelial cell proliferation	4	0.945626	0.00571954	HIF1A, CCL2, PDGFB, F3	341	15	13528	10.5791	0.999999	0.160799	9.60057
GOTERM_BP_FAT	GO:0032269~negative regulation of cellular protein metabolic process	12	2.83688	0.00584232	PSMA2, HSP90AB1, CAV1, SET, PSMC4, PSMB3, ITGAV, CDC20, PSMA7, THBS1, IGFBP3, TIMP1	341	180	13528	2.64477	0.999999	0.16211	9.79681
GOTERM_BP_FAT	GO:0022614~membrane to membrane docking	3	0.70922	0.00598965	ICAM1, EZR, MSN	341	5	13528	23.8029	1	0.164003	10.0317
GOTERM_BP_FAT	GO:0051338~regulation of transferase activity	19	4.49173	0.00623392	EGFR, CAV1, TNF, PDGFB, EDN1, PKN1, KITLG, DUSP12, APLP2, TGFB2, SPRY2, YWHAG, CCND1, CDKN1A, NPM1, CKS2, THBS1, GADD45A, CBS	341	372	13528	2.02624	1	0.168241	10.42
GOTERM_BP_FAT	GO:0042990~regulation of transcription factor import into nucleus	5	1.18203	0.00641145	TNF, NFKBIE, RHOA, NFKBIA, FLNA	341	30	13528	6.61193	1	0.170738	10.7012
GOTERM_BP_FAT	GO:0045859~regulation of protein kinase activity	18	4.25532	0.00649397	EGFR, CAV1, TNF, PDGFB, EDN1, PKN1, KITLG, APLP2, TGFB2, SPRY2, YWHAG, CCND1, CDKN1A, NPM1, CKS2, THBS1, GADD45A, CBS	341	345	13528	2.06982	1	0.170893	10.8316
GOTERM_BP_FAT	GO:0051146~striated muscle cell differentiation	8	1.89125	0.00663379	ACTG1, CAST, TNC, AGRN, MYH9, CAPN2, TPM1, ITGB1	341	88	13528	3.6065	1	0.172403	11.0521
GOTERM_BP_FAT	GO:0006952~defense response	27	6.38298	0.00669957	CXCL1, YWHAZ, MICA, TNF, CCL2, IL27RA, C3, IL32, ANKRD1, ITGB1, SAA2, SERPINA3, SERPINA1, THBS1, DEFB1, TNIP1, FOSL1, OLR1, IL8, ANXA1, HLA-B, COTL1, VDAC1, INHBB, HIF1A, CXCL16, F3	341	615	13528	1.74168	1	0.172143	11.1557
GOTERM_BP_FAT	GO:0048584~positive regulation of response to stimulus	14	3.30969	0.00678655	MICB, MICA, TNF, IL27RA, IL8, PDGFB, C3, F3, LANCL2, F2RL1, NFKBIA, HSPD1, THBS1, TGFB2	341	236	13528	2.3534	1	0.17238	11.2925
GOTERM_BP_FAT	GO:0007160~cell-matrix adhesion	8	1.89125	0.00704931	LAMA5, ITGAV, RHOA, ITGB4, ACTN1, BCAM, ITGA3, ITGB1	341	89	13528	3.56598	1	0.176625	11.7046
GOTERM_BP_FAT	GO:0050920~regulation of chemotaxis	5	1.18203	0.00721815	IL8, PDGFB, F3, F2RL1, THBS1	341	31	13528	6.39864	1	0.178649	11.9684
GOTERM_BP_FAT	GO:0042325~regulation of phosphorylation	22	5.20095	0.00727426	EGFR, CAV1, TNF, PDGFB, EDN1, PKN1, KITLG, DUSP12, APLP2, TGFB2, LIF, SPRY2, YWHAG, CCND1, CDKN1A, NPM1, CKS2, THBS1, IGFBP3, GADD45A, CBS, IL22RA2	341	466	13528	1.87291	1	0.178119	12.0559
GOTERM_BP_FAT	GO:0002684~positive regulation of immune system process	14	3.30969	0.0072813	ICAM1, CDKN1A, MICB, MICA, IL27RA, C3, IL18, F2RL1, NFKBIA, HSPD1, IL7R, THBS1, PNP, TGFB2	341	238	13528	2.33362	1	0.17652	12.0669
GOTERM_BP_FAT	GO:0001819~positive regulation of cytokine production	8	1.89125	0.00748382	HIF1A, TNF, IL27RA, SAA2, IL18, PYCARD, HSPD1, THBS1	341	90	13528	3.52636	1	0.179213	12.382
GOTERM_BP_FAT	GO:0019320~hexose catabolic process	7	1.65485	0.00765222	LDHB, LDHA, TPI1, PFKP, BPGM, GAPDH, ENO1	341	69	13528	4.02465	1	0.181109	12.6432
GOTERM_BP_FAT	GO:0009967~positive regulation of signal transduction	16	3.78251	0.00778934	CAV1, TNF, LGALS1, UBE2V1, L1CAM, JAG1, WLS, FLNA, TGFB2, LIF, IKBKE, HIF1A, F3, LANCL2, RHOA, THBS1	341	295	13528	2.15168	1	0.182298	12.8554
GOTERM_BP_FAT	GO:0051223~regulation of protein transport	9	2.12766	0.00803903	TNF, SAA2, NFKBIE, GOPC, RHOA, PYCARD, NFKBIA, FLNA, TGFB2	341	114	13528	3.13196	1	0.185818	13.2404
GOTERM_BP_FAT	GO:0045637~regulation of myeloid cell differentiation	7	1.65485	0.00819746	LIF, HIF1A, TNF, ETS1, NFKBIA, KITLG, JAG1	341	70	13528	3.96716	1	0.187369	13.484
GOTERM_BP_FAT	GO:0007229~integrin-mediated signaling pathway	7	1.65485	0.00819746	LAMA5, ITGAV, ITGB4, NEDD9, ITGA3, MYH9, ITGB1	341	70	13528	3.96716	1	0.187369	13.484
GOTERM_BP_FAT	GO:0046907~intracellular transport	28	6.61939	0.00838964	YWHAZ, CLTA, TNF, NFKBIA, EIF5A, SDCBP2, TPM1, TGFB2, SLC1A3, SET, SQSTM1, GOPC, NPM1, HSPA8, RAN, TOMM40, OPTN, MYH9, TINAGL1, FLNA, YWHAG, KRT18, YWHAH, ATP2A2, TXNDC5, PTTG1IP, KPNA2, SEC61G	341	657	13528	1.69072	1	0.189575	13.7785
GOTERM_BP_FAT	GO:0032386~regulation of intracellular transport	7	1.65485	0.00877007	TNF, NFKBIE, GOPC, RHOA, NFKBIA, CALM2, FLNA	341	71	13528	3.91128	1	0.195512	14.3587
GOTERM_BP_FAT	GO:0046365~monosaccharide catabolic process	7	1.65485	0.00877007	LDHB, LDHA, TPI1, PFKP, BPGM, GAPDH, ENO1	341	71	13528	3.91128	1	0.195512	14.3587
GOTERM_BP_FAT	GO:0048762~mesenchymal cell differentiation	6	1.41844	0.00887937	S100A4, HIF1A, LAMA5, EDN1, KITLG, TGFB2	341	51	13528	4.66724	1	0.195931	14.5247
GOTERM_BP_FAT	GO:0014031~mesenchymal cell development	6	1.41844	0.00887937	S100A4, HIF1A, LAMA5, EDN1, KITLG, TGFB2	341	51	13528	4.66724	1	0.195931	14.5247
GOTERM_BP_FAT	GO:0045639~positive regulation of myeloid cell differentiation	5	1.18203	0.00902612	LIF, HIF1A, ETS1, KITLG, JAG1	341	33	13528	6.01084	1	0.197076	14.7471
GOTERM_BP_FAT	GO:0043405~regulation of MAP kinase activity	10	2.36407	0.00926283	EGFR, SPRY2, CAV1, TNF, PDGFB, EDN1, PKN1, KITLG, THBS1, CBS	341	141	13528	2.81359	1	0.199941	15.1048
GOTERM_BP_FAT	GO:0060485~mesenchyme development	6	1.41844	0.00962681	S100A4, HIF1A, LAMA5, EDN1, KITLG, TGFB2	341	52	13528	4.57749	1	0.20517	15.6519
GOTERM_BP_FAT	GO:0030593~neutrophil chemotaxis	4	0.945626	0.00970204	CCL2, SAA2, IL8, TGFB2	341	18	13528	8.8159	1	0.204834	15.7646
GOTERM_BP_FAT	GO:0015837~amine transport	9	2.12766	0.00980903	YWHAZ, SLC1A3, SLC38A2, NFKBIE, FOLR1, SLC6A12, SERPINB7, SLC38A1, PDZK1	341	118	13528	3.0258	1	0.205099	15.9246
GOTERM_BP_FAT	GO:0050806~positive regulation of synaptic transmission	5	1.18203	0.0100312	EGFR, SLC1A3, TNF, CCL2, PINK1	341	34	13528	5.83405	1	0.207489	16.2559
GOTERM_BP_FAT	GO:0048520~positive regulation of behavior	5	1.18203	0.0100312	IL8, PDGFB, F3, F2RL1, THBS1	341	34	13528	5.83405	1	0.207489	16.2559
GOTERM_BP_FAT	GO:0006898~receptor-mediated endocytosis	6	1.41844	0.0104164	PICALM, PDLIM7, FOLR1, ATP5B, CXCL16, CAP1	341	53	13528	4.49112	1	0.212796	16.8274
GOTERM_BP_FAT	GO:0033157~regulation of intracellular protein transport	6	1.41844	0.0104164	TNF, NFKBIE, GOPC, RHOA, NFKBIA, FLNA	341	53	13528	4.49112	1	0.212796	16.8274
GOTERM_BP_FAT	GO:0051094~positive regulation of developmental process	15	3.5461	0.0107734	TNF, PDLIM7, TNFRSF12A, KITLG, JAG1, IL7R, PNP, TGFB2, LIF, HIF1A, ETS1, F3, RHOA, THBS1, IGFBP3	341	278	13528	2.14055	1	0.217468	17.3538
GOTERM_BP_FAT	GO:0051174~regulation of phosphorus metabolic process	22	5.20095	0.011057	EGFR, CAV1, TNF, PDGFB, EDN1, PKN1, KITLG, DUSP12, APLP2, TGFB2, LIF, SPRY2, YWHAG, CCND1, CDKN1A, NPM1, CKS2, THBS1, IGFBP3, GADD45A, CBS, IL22RA2	341	485	13528	1.79953	1	0.220734	17.7697
GOTERM_BP_FAT	GO:0019220~regulation of phosphate metabolic process	22	5.20095	0.011057	EGFR, CAV1, TNF, PDGFB, EDN1, PKN1, KITLG, DUSP12, APLP2, TGFB2, LIF, SPRY2, YWHAG, CCND1, CDKN1A, NPM1, CKS2, THBS1, IGFBP3, GADD45A, CBS, IL22RA2	341	485	13528	1.79953	1	0.220734	17.7697
GOTERM_BP_FAT	GO:0009084~glutamine family amino acid biosynthetic process	4	0.945626	0.0113099	PYCR2, SLC1A3, ASS1, GLUD1	341	19	13528	8.35191	1	0.223393	18.139
GOTERM_BP_FAT	GO:0051101~regulation of DNA binding	9	2.12766	0.0113156	ICAM1, TNF, ID1, NPM1, PYCARD, UBE2V1, NFKBIA, CALM2, FLNA	341	121	13528	2.95078	1	0.22172	18.1472
GOTERM_BP_FAT	GO:0070201~regulation of establishment of protein localization	9	2.12766	0.0113156	TNF, SAA2, NFKBIE, GOPC, RHOA, PYCARD, NFKBIA, FLNA, TGFB2	341	121	13528	2.95078	1	0.22172	18.1472
GOTERM_BP_FAT	GO:0033365~protein localization in organelle	10	2.36407	0.0114817	YWHAZ, TNF, RAN, PTTG1IP, NFKBIA, TOMM40, OPTN, KPNA2, SEC61G, TGFB2	341	146	13528	2.71723	1	0.222833	18.389
GOTERM_BP_FAT	GO:0043085~positive regulation of catalytic activity	23	5.43735	0.0120906	EGFR, CAV1, TNF, PDGFB, EDN1, PKN1, KITLG, DUSP12, CDC20, PSMA7, TPM1, TGFB2, PSMA2, CCND1, HIF1A, PSMC4, F3, PSMB3, NPM1, PYCARD, CAP1, HSPD1, THBS1	341	520	13528	1.7547	1	0.231413	19.269
GOTERM_BP_FAT	GO:0033627~cell adhesion mediated by integrin	3	0.70922	0.0121656	ICAM1, L1CAM, ITGB1	341	7	13528	17.0021	1	0.23089	19.3769
GOTERM_BP_FAT	GO:0006893~Golgi to plasma membrane transport	3	0.70922	0.0121656	KRT18, GOPC, OPTN	341	7	13528	17.0021	1	0.23089	19.3769
GOTERM_BP_FAT	GO:0048247~lymphocyte chemotaxis	3	0.70922	0.0121656	CCL2, SAA2, CXCL16	341	7	13528	17.0021	1	0.23089	19.3769
GOTERM_BP_FAT	GO:0009408~response to heat	6	1.41844	0.0130487	MICB, MICA, CCL2, HSPB1, THBS1, MYOF	341	56	13528	4.25052	1	0.243651	20.6357
GOTERM_BP_FAT	GO:0051971~positive regulation of transmission of nerve impulse	5	1.18203	0.0134721	EGFR, SLC1A3, TNF, CCL2, PINK1	341	37	13528	5.36102	1	0.248654	21.2327
GOTERM_BP_FAT	GO:0045787~positive regulation of cell cycle	6	1.41844	0.0140173	EGFR, CCND1, TNF, EDN1, FOSL1, TGFB2	341	57	13528	4.17595	1	0.255467	21.9951
GOTERM_BP_FAT	GO:0009611~response to wounding	23	5.43735	0.0147053	CXCL1, YWHAZ, TNF, CCL2, OLR1, PDGFB, IL8, C3, TNC, F2RL1, ANXA1, TPM1, TGFB2, NOTCH3, SLC1A3, HIF1A, SAA2, F3, SERPINA3, SERPINA1, ANXA8L2, CTSB, THBS1	341	530	13528	1.7216	1	0.264321	22.9474
GOTERM_BP_FAT	GO:0032270~positive regulation of cellular protein metabolic process	13	3.07329	0.0149284	CAV1, TNF, KITLG, EIF5A, NFKBIA, CDC20, PSMA7, LIF, PSMA2, CCND1, PSMC4, PSMB3, THBS1	341	233	13528	2.21343	1	0.265845	23.2539
GOTERM_BP_FAT	GO:0006892~post-Golgi vesicle-mediated transport	6	1.41844	0.0150331	CLTA, KRT18, TXNDC5, GOPC, OPTN, HSPA8	341	58	13528	4.10395	1	0.265544	23.3972
GOTERM_BP_FAT	GO:0051090~regulation of transcription factor activity	8	1.89125	0.0150876	ICAM1, TNF, ID1, NPM1, PYCARD, UBE2V1, NFKBIA, FLNA	341	103	13528	3.08129	1	0.26449	23.4717
GOTERM_BP_FAT	GO:0022402~cell cycle process	24	5.67376	0.0158575	EGFR, IL8, TUBB2A, RAN, NEDD9, CDC20, MYH9, PSMA7, SUGT1, ITGB1, TGFB2, RPA1, PSMA2, EIF4G2, CDKN1A, CCND1, PSMC4, PSMB3, KRT7, NPM1, CKS2, THBS1, KPNA2, GADD45A	341	565	13528	1.68516	1	0.274102	24.5176
GOTERM_BP_FAT	GO:0034613~cellular protein localization	19	4.49173	0.0160911	EGFR, CLTA, YWHAZ, TNF, RAN, NFKBIA, TOMM40, EIF5A, OPTN, FLNA, TGFB2, YWHAG, YWHAH, KRT18, ID1, NPM1, PTTG1IP, KPNA2, SEC61G	341	411	13528	1.83396	1	0.275635	24.8322
GOTERM_BP_FAT	GO:0031646~positive regulation of neurological system process	5	1.18203	0.0161361	EGFR, SLC1A3, TNF, CCL2, PINK1	341	39	13528	5.0861	1	0.274405	24.8928
GOTERM_BP_FAT	GO:0046164~alcohol catabolic process	7	1.65485	0.0161559	LDHB, LDHA, TPI1, PFKP, BPGM, GAPDH, ENO1	341	81	13528	3.42841	1	0.272827	24.9194
GOTERM_BP_FAT	GO:0009309~amine biosynthetic process	7	1.65485	0.0161559	PYCR2, OAZ1, SLC1A3, ASS1, GLUD1, CBS, TGFB2	341	81	13528	3.42841	1	0.272827	24.9194
GOTERM_BP_FAT	GO:0016053~organic acid biosynthetic process	10	2.36407	0.0164461	GGT5, PYCR2, TPI1, SLC1A3, ASS1, GLUD1, EDN1, FADS3, CBS, DEGS1	341	155	13528	2.55946	1	0.275147	25.3081
GOTERM_BP_FAT	GO:0046394~carboxylic acid biosynthetic process	10	2.36407	0.0164461	GGT5, PYCR2, TPI1, SLC1A3, ASS1, GLUD1, EDN1, FADS3, CBS, DEGS1	341	155	13528	2.55946	1	0.275147	25.3081
GOTERM_BP_FAT	GO:0070727~cellular macromolecule localization	19	4.49173	0.0171005	EGFR, CLTA, YWHAZ, TNF, RAN, NFKBIA, TOMM40, EIF5A, OPTN, FLNA, TGFB2, YWHAG, YWHAH, KRT18, ID1, NPM1, PTTG1IP, KPNA2, SEC61G	341	414	13528	1.82068	1	0.28256	26.1778
GOTERM_BP_FAT	GO:0051224~negative regulation of protein transport	5	1.18203	0.0175833	TNF, NFKBIE, GOPC, NFKBIA, FLNA	341	40	13528	4.95894	1	0.287415	26.8132
GOTERM_BP_FAT	GO:0009266~response to temperature stimulus	7	1.65485	0.0180299	MICB, MICA, CCL2, IL18, HSPB1, THBS1, MYOF	341	83	13528	3.34579	1	0.291672	27.3965
GOTERM_BP_FAT	GO:0010638~positive regulation of organelle organization	7	1.65485	0.0180299	CAV1, TNF, NPM1, EDN1, RHOA, TPM1, SYNPO	341	83	13528	3.34579	1	0.291672	27.3965
GOTERM_BP_FAT	GO:0032101~regulation of response to external stimulus	10	2.36407	0.0190957	CAV1, SAA2, IL8, PDGFB, C3, F3, EDN1, F2RL1, THBS1, ANXA2	341	159	13528	2.49507	1	0.304149	28.7707
GOTERM_BP_FAT	GO:0051092~positive regulation of NF-kappaB transcription factor activity	5	1.18203	0.0191089	ICAM1, TNF, NPM1, PYCARD, UBE2V1	341	41	13528	4.83799	1	0.302395	28.7875
GOTERM_BP_FAT	GO:0006935~chemotaxis	10	2.36407	0.0198039	CXCL1, CCL2, SAA2, IL8, PDGFB, CXCL16, DEFB1, FOSL1, CYR61, TGFB2	341	160	13528	2.47947	1	0.309613	29.6702
GOTERM_BP_FAT	GO:0042330~taxis	10	2.36407	0.0198039	CXCL1, CCL2, SAA2, IL8, PDGFB, CXCL16, DEFB1, FOSL1, CYR61, TGFB2	341	160	13528	2.47947	1	0.309613	29.6702
GOTERM_BP_FAT	GO:0051047~positive regulation of secretion	8	1.89125	0.020004	INHBB, TNF, SAA2, GLUD1, EDN1, PYCARD, PINK1, TGFB2	341	109	13528	2.91167	1	0.31028	29.9223
GOTERM_BP_FAT	GO:0016052~carbohydrate catabolic process	8	1.89125	0.020004	LDHB, LDHA, TPI1, CHI3L1, PFKP, BPGM, GAPDH, ENO1	341	109	13528	2.91167	1	0.31028	29.9223
GOTERM_BP_FAT	GO:0043408~regulation of MAPKKK cascade	8	1.89125	0.020004	LIF, CAV1, TNF, EDN1, PKN1, TIMP2, CBS, TGFB2	341	109	13528	2.91167	1	0.31028	29.9223
GOTERM_BP_FAT	GO:0044275~cellular carbohydrate catabolic process	7	1.65485	0.0200477	LDHB, LDHA, TPI1, PFKP, BPGM, GAPDH, ENO1	341	85	13528	3.26707	1	0.308929	29.9774
GOTERM_BP_FAT	GO:0051247~positive regulation of protein metabolic process	13	3.07329	0.0200843	CAV1, TNF, KITLG, EIF5A, NFKBIA, CDC20, PSMA7, LIF, PSMA2, CCND1, PSMC4, PSMB3, THBS1	341	243	13528	2.12235	1	0.307503	30.0234
GOTERM_BP_FAT	GO:0006605~protein targeting	12	2.83688	0.0201746	YWHAZ, YWHAG, TNF, RAN, PTTG1IP, NFKBIA, TOMM40, EIF5A, OPTN, KPNA2, SEC61G, TGFB2	341	215	13528	2.21423	1	0.306779	30.1367
GOTERM_BP_FAT	GO:0043623~cellular protein complex assembly	10	2.36407	0.0212769	CAV1, TCP1, PICALM, TUBB2A, FKBP4, TUBB6, AGRN, HSPD1, TUBA1C, FLNA	341	162	13528	2.44886	1	0.318746	31.5069
GOTERM_BP_FAT	GO:0050804~regulation of synaptic transmission	9	2.12766	0.0215033	EGFR, YWHAG, YWHAH, SLC1A3, TNF, CCL2, EDN1, PINK1, DBN1	341	136	13528	2.62532	1	0.319644	31.7852
GOTERM_BP_FAT	GO:0051493~regulation of cytoskeleton organization	9	2.12766	0.0215033	ARPC1B, CAV1, LIMA1, NPM1, EDN1, RHOA, ARPC5, TPM1, SYNPO	341	136	13528	2.62532	1	0.319644	31.7852
GOTERM_BP_FAT	GO:0044092~negative regulation of molecular function	16	3.78251	0.021824	CAST, CAV1, NFKBIA, CDC20, PSMA7, FLNA, TGFB2, PSMA2, SPRY2, YWHAG, CDKN1A, PSMC4, ID1, PSMB3, GADD45A, CALM2	341	334	13528	1.90043	1	0.321678	32.1775
GOTERM_BP_FAT	GO:0032103~positive regulation of response to external stimulus	6	1.41844	0.0221678	IL8, PDGFB, C3, F3, F2RL1, THBS1	341	64	13528	3.71921	1	0.323958	32.5957
GOTERM_BP_FAT	GO:0006979~response to oxidative stress	10	2.36407	0.0228272	EGFR, MICB, PXDN, HIF1A, OLR1, PRDX6, PDLIM1, TPM1, FOSL1, MB	341	164	13528	2.419	1	0.329962	33.3911
GOTERM_BP_FAT	GO:0032880~regulation of protein localization	9	2.12766	0.0232347	TNF, SAA2, NFKBIE, GOPC, RHOA, PYCARD, NFKBIA, FLNA, TGFB2	341	138	13528	2.58728	1	0.332879	33.8783
GOTERM_BP_FAT	GO:0009628~response to abiotic stimulus	17	4.01891	0.0238558	EGFR, CAV1, MICB, MICA, CCL2, TNF, IL18, PKN1, CCND1, CDKN1A, SLC1A3, SLC2A1, HSPB1, THBS1, FOSL1, IVL, MYOF	341	368	13528	1.83265	1	0.338224	34.6142
GOTERM_BP_FAT	GO:0042306~regulation of protein import into nucleus	5	1.18203	0.0241658	TNF, NFKBIE, RHOA, NFKBIA, FLNA	341	44	13528	4.50813	1	0.339894	34.9786
GOTERM_BP_FAT	GO:0032956~regulation of actin cytoskeleton organization	7	1.65485	0.0245325	ARPC1B, LIMA1, EDN1, RHOA, ARPC5, TPM1, SYNPO	341	89	13528	3.12023	1	0.342182	35.4072
GOTERM_BP_FAT	GO:0010740~positive regulation of protein kinase cascade	10	2.36407	0.0253018	LIF, IKBKE, TNF, F3, LGALS1, RHOA, UBE2V1, WLS, FLNA, TGFB2	341	167	13528	2.37554	1	0.348951	36.2977
GOTERM_BP_FAT	GO:0006865~amino acid transport	7	1.65485	0.0257503	SLC1A3, SLC38A2, NFKBIE, FOLR1, SLC6A12, SLC38A1, PDZK1	341	90	13528	3.08557	1	0.352027	36.8115
GOTERM_BP_FAT	GO:0051495~positive regulation of cytoskeleton organization	5	1.18203	0.0260145	CAV1, EDN1, RHOA, TPM1, SYNPO	341	45	13528	4.40795	1	0.35303	37.1124
GOTERM_BP_FAT	GO:0051222~positive regulation of protein transport	6	1.41844	0.0264383	TNF, SAA2, RHOA, PYCARD, FLNA, TGFB2	341	67	13528	3.55268	1	0.355754	37.5921
GOTERM_BP_FAT	GO:0044270~nitrogen compound catabolic process	6	1.41844	0.0264383	TST, ATP5B, OLA1, CDA, ACLY, PNP	341	67	13528	3.55268	1	0.355754	37.5921
GOTERM_BP_FAT	GO:0044087~regulation of cellular component biogenesis	9	2.12766	0.0269875	ARPC1B, CAV1, EDN1, RHOA, AGRN, ARPC5, THBS1, TPM1, SYNPO	341	142	13528	2.51439	1	0.359779	38.2088
GOTERM_BP_FAT	GO:0050795~regulation of behavior	5	1.18203	0.0279458	IL8, PDGFB, F3, F2RL1, THBS1	341	46	13528	4.31213	1	0.368049	39.2709
GOTERM_BP_FAT	GO:0048660~regulation of smooth muscle cell proliferation	5	1.18203	0.0279458	EGFR, TNF, PDGFB, EDN1, IGFBP3	341	46	13528	4.31213	1	0.368049	39.2709
GOTERM_BP_FAT	GO:0050730~regulation of peptidyl-tyrosine phosphorylation	6	1.41844	0.0279704	LIF, EGFR, CAV1, PDGFB, KITLG, IL22RA2	341	68	13528	3.50043	1	0.366396	39.2979
GOTERM_BP_FAT	GO:0032970~regulation of actin filament-based process	7	1.65485	0.028305	ARPC1B, LIMA1, EDN1, RHOA, ARPC5, TPM1, SYNPO	341	92	13528	3.01849	1	0.36799	39.6646
GOTERM_BP_FAT	GO:0031099~regeneration	6	1.41844	0.0295577	LIF, NOTCH3, CDKN1A, CCND1, CCL2, GAS6	341	69	13528	3.4497	1	0.378955	41.0188
GOTERM_BP_FAT	GO:0001775~cell activation	14	3.30969	0.0297087	EGFR, ICAM1, YWHAZ, MICB, TNF, MICA, IL8, RELB, EDN1, MYH9, IL7R, ITGB1, SAA2, HSPD1	341	287	13528	1.9352	1	0.37857	41.18
GOTERM_BP_FAT	GO:0007520~myoblast fusion	3	0.70922	0.029819	CAST, MYH9, CAPN2	341	11	13528	10.8195	1	0.377783	41.2976
GOTERM_BP_FAT	GO:0032729~positive regulation of interferon-gamma production	3	0.70922	0.029819	IL27RA, IL18, HSPD1	341	11	13528	10.8195	1	0.377783	41.2976
GOTERM_BP_FAT	GO:0006929~substrate-bound cell migration	3	0.70922	0.029819	PDGFB, TNFRSF12A, ATP5B	341	11	13528	10.8195	1	0.377783	41.2976
GOTERM_BP_FAT	GO:0045597~positive regulation of cell differentiation	12	2.83688	0.030215	LIF, HIF1A, PDLIM7, ETS1, TNFRSF12A, RHOA, KITLG, JAG1, IL7R, IGFBP3, PNP, TGFB2	341	229	13528	2.07886	1	0.379854	41.7177
GOTERM_BP_FAT	GO:0034622~cellular macromolecular complex assembly	15	3.5461	0.03043	EIF6, CAV1, TCP1, TUBB2A, FKBP4, FLNA, PICALM, SET, NPM1, SNRPB, TUBB6, H3F3B, HSPD1, AGRN, TUBA1C	341	318	13528	1.8713	1	0.380107	41.9447
GOTERM_BP_FAT	GO:0031400~negative regulation of protein modification process	8	1.89125	0.0305099	PSMA2, CAV1, SET, PSMC4, PSMB3, CDC20, PSMA7, IGFBP3	341	119	13528	2.667	1	0.379027	42.0289
GOTERM_BP_FAT	GO:0043388~positive regulation of DNA binding	6	1.41844	0.0312008	ICAM1, TNF, NPM1, PYCARD, UBE2V1, CALM2	341	70	13528	3.40042	1	0.383924	42.7516
GOTERM_BP_FAT	GO:0016044~membrane organization	17	4.01891	0.0314383	EGFR, CAV1, CLTA, PDLIM7, ATP5B, MAL, PICALM, FOLR1, CXCL16, ITGAV, TXNDC5, VAMP3, AGRN, CAP1, THBS1, TRIP10, HSPA8	341	381	13528	1.77012	1	0.384363	42.998
GOTERM_BP_FAT	GO:0046942~carboxylic acid transport	9	2.12766	0.0322456	SLC1A3, SLC38A2, NFKBIE, FOLR1, SLC6A12, ANXA1, SLC38A1, PDZK1, AKR1C1	341	147	13528	2.42887	1	0.390239	43.8283
GOTERM_BP_FAT	GO:0051969~regulation of transmission of nerve impulse	9	2.12766	0.0322456	EGFR, YWHAG, YWHAH, SLC1A3, TNF, CCL2, EDN1, PINK1, DBN1	341	147	13528	2.42887	1	0.390239	43.8283
GOTERM_BP_FAT	GO:0006081~cellular aldehyde metabolic process	4	0.945626	0.0324062	ALDH1A1, TPI1, AKR1B10, GLO1	341	28	13528	5.66736	1	0.389907	43.9921
GOTERM_BP_FAT	GO:0051260~protein homooligomerization	7	1.65485	0.0324415	CAV1, C1QTNF1, GOPC, PFKP, CDA, AKR1C1, DCTPP1	341	95	13528	2.92317	1	0.388398	44.028
GOTERM_BP_FAT	GO:0015849~organic acid transport	9	2.12766	0.0333755	SLC1A3, SLC38A2, NFKBIE, FOLR1, SLC6A12, ANXA1, SLC38A1, PDZK1, AKR1C1	341	148	13528	2.41246	1	0.39529	44.9712
GOTERM_BP_FAT	GO:0016192~vesicle-mediated transport	23	5.43735	0.0340084	CAV1, CLTA, YWHAZ, PDLIM7, ATP5B, OPTN, TINAGL1, FLNA, KRT18, PICALM, FOLR1, SQSTM1, CXCL16, ITGAV, TXNDC5, GOPC, ARF4, MCFD2, VAMP3, CAP1, THBS1, TRIP10, HSPA8	341	576	13528	1.58411	1	0.399277	45.6017
GOTERM_BP_FAT	GO:0060284~regulation of cell development	11	2.60047	0.0345572	NOTCH3, YWHAG, YWHAH, TNFRSF12A, EDN1, RHOA, AGRN, TIMP2, IGFBP3, DBN1, TGFB2	341	205	13528	2.12872	1	0.402434	46.143
GOTERM_BP_FAT	GO:0045214~sarcomere organization	3	0.70922	0.0351979	ACTG1, TPM1, ITGB1	341	12	13528	9.91789	1	0.406364	46.7685
GOTERM_BP_FAT	GO:0007431~salivary gland development	3	0.70922	0.0351979	EGFR, LAMA5, TGFB2	341	12	13528	9.91789	1	0.406364	46.7685
GOTERM_BP_FAT	GO:0000768~syncytium formation by plasma membrane fusion	3	0.70922	0.0351979	CAST, MYH9, CAPN2	341	12	13528	9.91789	1	0.406364	46.7685
GOTERM_BP_FAT	GO:0042327~positive regulation of phosphorylation	7	1.65485	0.0354066	LIF, EGFR, CAV1, CCND1, TNF, KITLG, THBS1	341	97	13528	2.8629	1	0.406389	46.9707
GOTERM_BP_FAT	GO:0043123~positive regulation of I-kappaB kinase/NF-kappaB cascade	7	1.65485	0.0354066	IKBKE, TNF, LGALS1, RHOA, UBE2V1, WLS, FLNA	341	97	13528	2.8629	1	0.406389	46.9707
GOTERM_BP_FAT	GO:0045807~positive regulation of endocytosis	4	0.945626	0.0354915	CAV1, ACTN4, C3, CD63	341	29	13528	5.47194	1	0.405319	47.0528
GOTERM_BP_FAT	GO:0008104~protein localization	32	7.56501	0.036462	TLN1, YWHAZ, CAV1, CLTA, TNF, NFKBIE, NFKBIA, EIF5A, TGFB2, EZR, SQSTM1, GOPC, NPM1, EGFR, ACTN4, RAN, TOMM40, MAL, OPTN, MYH9, FLNA, RAB31, YWHAG, YWHAH, KRT18, ID1, BACE2, MCFD2, ARF4, PTTG1IP, KPNA2, SEC61G	341	882	13528	1.43933	1	0.412033	47.9824
GOTERM_BP_FAT	GO:0030097~hemopoiesis	12	2.83688	0.0364719	RPA1, TNF, RELB, KITLG, BPGM, JAG1, MYH9, IL7R, ITGB1, MB, TIMP1, TGFB2	341	236	13528	2.0172	1	0.410301	47.9919
GOTERM_BP_FAT	GO:0034621~cellular macromolecular complex subunit organization	16	3.78251	0.0365364	EIF6, CAV1, TCP1, TUBB2A, FKBP4, FLNA, PICALM, SET, PTRF, NPM1, SNRPB, TUBB6, H3F3B, HSPD1, AGRN, TUBA1C	341	357	13528	1.778	1	0.409058	48.0531
GOTERM_BP_FAT	GO:0033559~unsaturated fatty acid metabolic process	5	1.18203	0.0388593	GGT5, AKR1C2, EDN1, FADS3, DEGS1	341	51	13528	3.88937	1	0.427036	50.2134
GOTERM_BP_FAT	GO:0008652~cellular amino acid biosynthetic process	5	1.18203	0.0388593	PYCR2, SLC1A3, ASS1, GLUD1, CBS	341	51	13528	3.88937	1	0.427036	50.2134
GOTERM_BP_FAT	GO:0001817~regulation of cytokine production	10	2.36407	0.0393886	INHBB, HIF1A, TNF, IL27RA, SAA2, IL18, PYCARD, HSPD1, THBS1, TGFB2	341	181	13528	2.1918	1	0.429617	50.6937
GOTERM_BP_FAT	GO:0031644~regulation of neurological system process	9	2.12766	0.0394294	EGFR, YWHAG, YWHAH, SLC1A3, TNF, CCL2, EDN1, PINK1, DBN1	341	153	13528	2.33362	1	0.428132	50.7305
GOTERM_BP_FAT	GO:0051098~regulation of binding	9	2.12766	0.0394294	ICAM1, TNF, ID1, NPM1, PYCARD, UBE2V1, NFKBIA, CALM2, FLNA	341	153	13528	2.33362	1	0.428132	50.7305
GOTERM_BP_FAT	GO:0045937~positive regulation of phosphate metabolic process	7	1.65485	0.0401721	LIF, EGFR, CAV1, CCND1, TNF, KITLG, THBS1	341	100	13528	2.77701	1	0.43242	51.3966
GOTERM_BP_FAT	GO:0010562~positive regulation of phosphorus metabolic process	7	1.65485	0.0401721	LIF, EGFR, CAV1, CCND1, TNF, KITLG, THBS1	341	100	13528	2.77701	1	0.43242	51.3966
GOTERM_BP_FAT	GO:0000302~response to reactive oxygen species	6	1.41844	0.0402672	PXDN, OLR1, PRDX6, TPM1, FOSL1, MB	341	75	13528	3.17372	1	0.431385	51.4812
GOTERM_BP_FAT	GO:0006412~translation	15	3.5461	0.0407058	EGFR, EIF6, MRPS24, MRPL9, EIF5A, EIF4G2, MRPL12, RPS3AP5, EIF4H, RPL15P3, RPL5, FARSA, MRPL33, TNIP1, EIF3M	341	331	13528	1.7978	1	0.43314	51.8699
GOTERM_BP_FAT	GO:0051726~regulation of cell cycle	15	3.5461	0.0407058	EGFR, TNF, EDN1, ITGB1, TGFB2, LIF, CCND1, CDKN1A, ETS1, BTG3, NPM1, CKS2, GADD45A, FOSL1, HSPA8	341	331	13528	1.7978	1	0.43314	51.8699
GOTERM_BP_FAT	GO:0010595~positive regulation of endothelial cell migration	3	0.70922	0.0409191	PDGFB, EDN1, THBS1	341	13	13528	9.15497	1	0.433064	52.0579
GOTERM_BP_FAT	GO:0042993~positive regulation of transcription factor import into nucleus	3	0.70922	0.0409191	TNF, RHOA, FLNA	341	13	13528	9.15497	1	0.433064	52.0579
GOTERM_BP_FAT	GO:0007517~muscle organ development	11	2.60047	0.0409207	LIF, CAV1, TAGLN, LAMA5, TNC, RHOA, AGRN, TAGLN2, TPM1, ITGB1, TGFB2	341	211	13528	2.06819	1	0.431297	52.0593
GOTERM_BP_FAT	GO:0010608~posttranscriptional regulation of gene expression	11	2.60047	0.0409207	ZFP36L2, EIF4G2, TNF, EIF4H, KRT7, MAGOH, HSPB1, EIF5A, HSPD1, THBS1, FLNA	341	211	13528	2.06819	1	0.431297	52.0593
GOTERM_BP_FAT	GO:0009064~glutamine family amino acid metabolic process	5	1.18203	0.0412954	PYCR2, SLC1A3, ASS1, GLUD1, GFPT2	341	52	13528	3.81457	1	0.432517	52.3877
GOTERM_BP_FAT	GO:0055002~striated muscle cell development	5	1.18203	0.0412954	ACTG1, TNC, AGRN, TPM1, ITGB1	341	52	13528	3.81457	1	0.432517	52.3877
GOTERM_BP_FAT	GO:0032535~regulation of cellular component size	13	3.07329	0.0414697	ARPC1B, CDKN1A, LIMA1, PDGFB, TNFRSF12A, CXCL16, NPM1, EDN1, CDA, ARPC5, IL7R, ENO1, TGFB2	341	271	13528	1.90306	1	0.432139	52.5398
GOTERM_BP_FAT	GO:0002697~regulation of immune effector process	7	1.65485	0.0418466	ICAM1, MICB, TNF, IL27RA, C3, HSPD1, IL7R	341	101	13528	2.74951	1	0.433359	52.8672
GOTERM_BP_FAT	GO:0022406~membrane docking	4	0.945626	0.0420982	ICAM1, EZR, VAMP3, MSN	341	31	13528	5.11891	1	0.433585	53.0844
GOTERM_BP_FAT	GO:0048661~positive regulation of smooth muscle cell proliferation	4	0.945626	0.0420982	EGFR, TNF, PDGFB, EDN1	341	31	13528	5.11891	1	0.433585	53.0844
GOTERM_BP_FAT	GO:0006913~nucleocytoplasmic transport	9	2.12766	0.0433932	TNF, SET, RAN, NPM1, PTTG1IP, NFKBIA, EIF5A, KPNA2, TGFB2	341	156	13528	2.28874	1	0.441866	54.1881
GOTERM_BP_FAT	GO:0032989~cellular component morphogenesis	17	4.01891	0.0434213	EGFR, ACTB, S100A4, L1CAM, MYH9, IL7R, TPM1, ITGB1, TGFB2, ACTG1, EZR, HIF1A, SLC1A3, LAMA5, RHOA, CAP1, LAMB1	341	397	13528	1.69878	1	0.440338	54.2118
GOTERM_BP_FAT	GO:0043406~positive regulation of MAP kinase activity	7	1.65485	0.0435644	EGFR, TNF, PDGFB, EDN1, PKN1, KITLG, THBS1	341	102	13528	2.72256	1	0.439699	54.3322
GOTERM_BP_FAT	GO:0030162~regulation of proteolysis	5	1.18203	0.0438161	HSP90AB1, TNF, SERPINB4, THBS1, TIMP1	341	53	13528	3.7426	1	0.439889	54.5432
GOTERM_BP_FAT	GO:0010038~response to metal ion	8	1.89125	0.0442109	EGFR, ACTG1, ACTB, CAV1, CCND1, SERPINA1, THBS1, CALM2	341	129	13528	2.46025	1	0.441156	54.8723
GOTERM_BP_FAT	GO:0080135~regulation of cellular response to stress	7	1.65485	0.0453259	TNF, NPM1, EDN1, UBE2V1, PKN1, CBS, TGFB2	341	103	13528	2.69613	1	0.447764	55.7898
GOTERM_BP_FAT	GO:0006970~response to osmotic stress	4	0.945626	0.0456163	EGFR, TNF, SLC2A1, PKN1	341	32	13528	4.95894	1	0.448196	56.0258
GOTERM_BP_FAT	GO:0051169~nuclear transport	9	2.12766	0.0461769	TNF, SET, RAN, NPM1, PTTG1IP, NFKBIA, EIF5A, KPNA2, TGFB2	341	158	13528	2.25977	1	0.450598	56.4781
GOTERM_BP_FAT	GO:0051384~response to glucocorticoid stimulus	6	1.41844	0.0463992	CDKN1A, CAV1, CCND1, TNF, CCL2, FOSL1	341	78	13528	3.05166	1	0.450515	56.6562
GOTERM_BP_FAT	GO:0051099~positive regulation of binding	6	1.41844	0.0463992	ICAM1, TNF, NPM1, PYCARD, UBE2V1, CALM2	341	78	13528	3.05166	1	0.450515	56.6562
GOTERM_BP_FAT	GO:0000079~regulation of cyclin-dependent protein kinase activity	5	1.18203	0.0464214	EGFR, CDKN1A, CCND1, CKS2, GADD45A	341	54	13528	3.67329	1	0.448987	56.674
GOTERM_BP_FAT	GO:0045596~negative regulation of cell differentiation	11	2.60047	0.0465084	LIF, NOTCH3, CAV1, WNT4, CCND1, YWHAH, ITGAV, RHOA, NFKBIA, JAG1, ITGB1	341	216	13528	2.02031	1	0.447937	56.7435
GOTERM_BP_FAT	GO:0002520~immune system development	13	3.07329	0.0465249	RPA1, TNF, RELB, KITLG, BPGM, JAG1, HSPD1, MYH9, IL7R, ITGB1, TIMP1, MB, TGFB2	341	276	13528	1.86859	1	0.446389	56.7567
GOTERM_BP_FAT	GO:0031401~positive regulation of protein modification process	10	2.36407	0.046803	LIF, PSMA2, CAV1, CCND1, TNF, PSMC4, PSMB3, KITLG, CDC20, PSMA7	341	187	13528	2.12147	1	0.44673	56.9781
GOTERM_BP_FAT	GO:0006949~syncytium formation	3	0.70922	0.046962	CAST, MYH9, CAPN2	341	14	13528	8.50105	1	0.446218	57.1042
GOTERM_BP_FAT	GO:0045069~regulation of viral genome replication	3	0.70922	0.046962	TNF, IL8, TNIP1	341	14	13528	8.50105	1	0.446218	57.1042
GOTERM_BP_FAT	GO:0045823~positive regulation of heart contraction	3	0.70922	0.046962	EDN1, TPM1, TGFB2	341	14	13528	8.50105	1	0.446218	57.1042
GOTERM_BP_FAT	GO:0032233~positive regulation of actin filament bundle formation	3	0.70922	0.046962	RHOA, TPM1, SYNPO	341	14	13528	8.50105	1	0.446218	57.1042
GOTERM_BP_FAT	GO:0030198~extracellular matrix organization	7	1.65485	0.0471312	COL4A2, TGFBI, C6ORF15, APLP2, CYR61, TGFB2, ANXA2	341	104	13528	2.6702	1	0.445783	57.238
GOTERM_BP_FAT	GO:0017038~protein import	8	1.89125	0.0473588	YWHAZ, TNF, RAN, PTTG1IP, NFKBIA, TOMM40, KPNA2, TGFB2	341	131	13528	2.42269	1	0.445766	57.4174
GOTERM_BP_FAT	GO:0033043~regulation of organelle organization	11	2.60047	0.0476706	ARPC1B, CAV1, LIMA1, TNF, SET, NPM1, EDN1, RHOA, ARPC5, TPM1, SYNPO	341	217	13528	2.011	1	0.446342	57.6619
GOTERM_BP_FAT	GO:0043086~negative regulation of catalytic activity	13	3.07329	0.0478118	CAST, CAV1, CDC20, PSMA7, FLNA, TGFB2, PSMA2, SPRY2, CDKN1A, YWHAG, PSMC4, PSMB3, GADD45A	341	277	13528	1.86184	1	0.445719	57.7723
GOTERM_BP_FAT	GO:0044057~regulation of system process	14	3.30969	0.048872	EGFR, CAV1, CCL2, TNF, EDN1, PINK1, TPM1, TGFB2, INHBB, YWHAG, SLC1A3, YWHAH, ATP2A2, DBN1	341	309	13528	1.79742	1	0.451486	58.592
GOTERM_BP_FAT	GO:0014033~neural crest cell differentiation	4	0.945626	0.0492754	HIF1A, LAMA5, EDN1, KITLG	341	33	13528	4.80867	1	0.452653	58.8999
GOTERM_BP_FAT	GO:0014032~neural crest cell development	4	0.945626	0.0492754	HIF1A, LAMA5, EDN1, KITLG	341	33	13528	4.80867	1	0.452653	58.8999
GOTERM_BP_FAT	GO:0051325~interphase	7	1.65485	0.0508738	EGFR, CDKN1A, CCND1, KRT7, KPNA2, GADD45A, ITGB1	341	106	13528	2.61982	1	0.461904	60.0991
GOTERM_BP_FAT	GO:0006886~intracellular protein transport	16	3.78251	0.0511062	CLTA, YWHAZ, TNF, RAN, NFKBIA, EIF5A, TOMM40, OPTN, TGFB2, YWHAG, YWHAH, KRT18, NPM1, PTTG1IP, KPNA2, SEC61G	341	374	13528	1.69718	1	0.461849	60.2706
GOTERM_BP_FAT	GO:0006915~apoptosis	23	5.43735	0.0511798	TNFRSF21, TNF, TNFRSF12A, LGALS1, EGLN3, NFKBIA, BIRC3, VDAC1, PLEKHF1, DAPL1, PEA15, KRT18, SQSTM1, F3, KRT8, PYCARD, HSPD1, TNFAIP3, THBS1, PHLDA3, GADD45A, API5, PHLDA2	341	602	13528	1.51569	1	0.460736	60.3248
GOTERM_BP_FAT	GO:0055001~muscle cell development	5	1.18203	0.0518853	ACTG1, TNC, AGRN, TPM1, ITGB1	341	56	13528	3.5421	1	0.463826	60.8407
GOTERM_BP_FAT	GO:0042542~response to hydrogen peroxide	5	1.18203	0.0518853	PXDN, OLR1, PRDX6, FOSL1, MB	341	56	13528	3.5421	1	0.463826	60.8407
GOTERM_BP_FAT	GO:0043603~cellular amide metabolic process	5	1.18203	0.0518853	LDHB, TPI1, ASS1, IDH3B, PNP	341	56	13528	3.5421	1	0.463826	60.8407
GOTERM_BP_FAT	GO:0009612~response to mechanical stimulus	5	1.18203	0.0518853	CAV1, SLC1A3, TNF, CCL2, FOSL1	341	56	13528	3.5421	1	0.463826	60.8407
GOTERM_BP_FAT	GO:0042060~wound healing	10	2.36407	0.0522273	NOTCH3, HIF1A, SAA2, PDGFB, F3, F2RL1, ANXA8L2, SERPINA1, TPM1, TGFB2	341	191	13528	2.07704	1	0.464487	61.0885
GOTERM_BP_FAT	GO:0070271~protein complex biogenesis	20	4.72813	0.052486	CAV1, TCP1, TUBB2A, FKBP4, PFKP, BIRC3, FLNA, PICALM, PTRF, C1QTNF1, GOPC, NPM1, TUBB6, CDA, VAMP3, AGRN, HSPD1, AKR1C1, TUBA1C, DCTPP1	341	505	13528	1.57115	1	0.464596	61.275
GOTERM_BP_FAT	GO:0006461~protein complex assembly	20	4.72813	0.052486	CAV1, TCP1, TUBB2A, FKBP4, PFKP, BIRC3, FLNA, PICALM, PTRF, C1QTNF1, GOPC, NPM1, TUBB6, CDA, VAMP3, AGRN, HSPD1, AKR1C1, TUBA1C, DCTPP1	341	505	13528	1.57115	1	0.464596	61.275
GOTERM_BP_FAT	GO:0006636~unsaturated fatty acid biosynthetic process	4	0.945626	0.0530732	GGT5, EDN1, FADS3, DEGS1	341	34	13528	4.66724	1	0.466841	61.6951
GOTERM_BP_FAT	GO:0002687~positive regulation of leukocyte migration	3	0.70922	0.053307	ICAM1, F2RL1, THBS1	341	15	13528	7.93431	1	0.466778	61.8612
GOTERM_BP_FAT	GO:0048545~response to steroid hormone stimulus	10	2.36407	0.0536364	CDKN1A, CAV1, CCND1, TNF, CCL2, PDGFB, SERPINA1, THBS1, FOSL1, TGFB2	341	192	13528	2.06623	1	0.467331	62.094
GOTERM_BP_FAT	GO:0043062~extracellular structure organization	9	2.12766	0.0536402	COL4A2, TNC, TGFBI, C6ORF15, AGRN, APLP2, CYR61, TGFB2, ANXA2	341	163	13528	2.19045	1	0.465792	62.0967
GOTERM_BP_FAT	GO:0007049~cell cycle	28	6.61939	0.0538463	TUBB2A, NEDD9, PSMA7, ITGB1, TGFB2, RPA1, PSMB3, KRT7, NPM1, KLK10, THBS1, EGFR, IL8, RAN, ANXA1, CDC20, MYH9, SUGT1, PSMA2, EIF4G2, CDKN1A, CCND1, KRT18, PSMC4, CKS2, KPNA2, GADD45A, CALM2	341	776	13528	1.43145	1	0.465559	62.2417
GOTERM_BP_FAT	GO:0030336~negative regulation of cell migration	5	1.18203	0.0547432	PDGFB, THBS1, IGFBP3, TPM1, VCL	341	57	13528	3.47996	1	0.469711	62.8666
GOTERM_BP_FAT	GO:0034330~cell junction organization	5	1.18203	0.0547432	TLN1, LAMA5, ACTN1, VCL, TGFB2	341	57	13528	3.47996	1	0.469711	62.8666
GOTERM_BP_FAT	GO:0012501~programmed cell death	23	5.43735	0.0575956	TNFRSF21, TNF, TNFRSF12A, LGALS1, EGLN3, NFKBIA, BIRC3, VDAC1, PLEKHF1, DAPL1, PEA15, KRT18, SQSTM1, F3, KRT8, PYCARD, HSPD1, TNFAIP3, THBS1, PHLDA3, GADD45A, API5, PHLDA2	341	611	13528	1.49336	1	0.48589	64.7897
GOTERM_BP_FAT	GO:0006417~regulation of translation	8	1.89125	0.0576455	EIF4G2, TNF, EIF4H, KRT7, MAGOH, HSPB1, EIF5A, THBS1	341	137	13528	2.31659	1	0.484631	64.8225
GOTERM_BP_FAT	GO:0034656~nucleobase, nucleoside and nucleotide catabolic process	5	1.18203	0.0576847	ATP5B, OLA1, CDA, ACLY, PNP	341	58	13528	3.41996	1	0.483315	64.8483
GOTERM_BP_FAT	GO:0034655~nucleobase, nucleoside, nucleotide and nucleic acid catabolic process	5	1.18203	0.0576847	ATP5B, OLA1, CDA, ACLY, PNP	341	58	13528	3.41996	1	0.483315	64.8483
GOTERM_BP_FAT	GO:0046822~regulation of nucleocytoplasmic transport	5	1.18203	0.0576847	TNF, NFKBIE, RHOA, NFKBIA, FLNA	341	58	13528	3.41996	1	0.483315	64.8483
GOTERM_BP_FAT	GO:0014902~myotube differentiation	3	0.70922	0.0599352	CAST, MYH9, CAPN2	341	16	13528	7.43842	1	0.495298	66.2966
GOTERM_BP_FAT	GO:0022612~gland morphogenesis	3	0.70922	0.0599352	EGFR, CAV1, TGFB2	341	16	13528	7.43842	1	0.495298	66.2966
GOTERM_BP_FAT	GO:0051412~response to corticosterone stimulus	3	0.70922	0.0599352	CDKN1A, CCND1, FOSL1	341	16	13528	7.43842	1	0.495298	66.2966
GOTERM_BP_FAT	GO:0006200~ATP catabolic process	3	0.70922	0.0599352	ATP5B, OLA1, ACLY	341	16	13528	7.43842	1	0.495298	66.2966
GOTERM_BP_FAT	GO:0031960~response to corticosteroid stimulus	6	1.41844	0.0627543	CDKN1A, CAV1, CCND1, TNF, CCL2, FOSL1	341	85	13528	2.80035	1	0.510212	68.0315
GOTERM_BP_FAT	GO:0051091~positive regulation of transcription factor activity	5	1.18203	0.0638164	ICAM1, TNF, NPM1, PYCARD, UBE2V1	341	60	13528	3.30596	1	0.514713	68.663
GOTERM_BP_FAT	GO:0048534~hemopoietic or lymphoid organ development	12	2.83688	0.0643873	RPA1, TNF, RELB, KITLG, BPGM, JAG1, MYH9, IL7R, ITGB1, MB, TIMP1, TGFB2	341	260	13528	1.83099	1	0.516375	68.9976
GOTERM_BP_FAT	GO:0019722~calcium-mediated signaling	4	0.945626	0.0652766	EGFR, TNF, IL8, EDN1	341	37	13528	4.28882	1	0.519799	69.512
GOTERM_BP_FAT	GO:0009895~negative regulation of catabolic process	4	0.945626	0.0652766	HSP90AB1, TNF, FLNA, TIMP1	341	37	13528	4.28882	1	0.519799	69.512
GOTERM_BP_FAT	GO:0001667~ameboidal cell migration	4	0.945626	0.0652766	HIF1A, LAMA5, KITLG, CAP1	341	37	13528	4.28882	1	0.519799	69.512
GOTERM_BP_FAT	GO:0006606~protein import into nucleus	6	1.41844	0.0653248	TNF, RAN, PTTG1IP, NFKBIA, KPNA2, TGFB2	341	86	13528	2.76778	1	0.518506	69.5397
GOTERM_BP_FAT	GO:0042307~positive regulation of protein import into nucleus	3	0.70922	0.0668284	TNF, RHOA, FLNA	341	17	13528	7.00086	1	0.525258	70.3905
GOTERM_BP_FAT	GO:0042177~negative regulation of protein catabolic process	3	0.70922	0.0668284	HSP90AB1, FLNA, TIMP1	341	17	13528	7.00086	1	0.525258	70.3905
GOTERM_BP_FAT	GO:0040013~negative regulation of locomotion	5	1.18203	0.0670054	PDGFB, THBS1, IGFBP3, TPM1, VCL	341	61	13528	3.25177	1	0.524672	70.4892
GOTERM_BP_FAT	GO:0006954~inflammatory response	14	3.30969	0.0677542	CXCL1, YWHAZ, CCL2, TNF, IL8, OLR1, C3, ANXA1, HIF1A, SAA2, F3, SERPINA3, SERPINA1, THBS1	341	325	13528	1.70893	1	0.527196	70.9032
GOTERM_BP_FAT	GO:0033674~positive regulation of kinase activity	11	2.60047	0.0677818	EGFR, CCND1, TNF, PDGFB, NPM1, EDN1, PKN1, KITLG, DUSP12, THBS1, TGFB2	341	231	13528	1.88912	1	0.525803	70.9183
GOTERM_BP_FAT	GO:0051170~nuclear import	6	1.41844	0.0706402	TNF, RAN, PTTG1IP, NFKBIA, KPNA2, TGFB2	341	88	13528	2.70488	1	0.539484	72.4482
GOTERM_BP_FAT	GO:0051259~protein oligomerization	9	2.12766	0.0726555	CAV1, C1QTNF1, GOPC, NPM1, PFKP, CDA, BIRC3, AKR1C1, DCTPP1	341	174	13528	2.05198	1	0.548393	73.4807
GOTERM_BP_FAT	GO:0070141~response to UV-A	2	0.472813	0.0735253	EGFR, CCND1	341	3	13528	26.4477	1	0.55129	73.9151
GOTERM_BP_FAT	GO:0046629~gamma-delta T cell activation	2	0.472813	0.0735253	MICB, MICA	341	3	13528	26.4477	1	0.55129	73.9151
GOTERM_BP_FAT	GO:0043001~Golgi to plasma membrane protein transport	2	0.472813	0.0735253	KRT18, OPTN	341	3	13528	26.4477	1	0.55129	73.9151
GOTERM_BP_FAT	GO:0040037~negative regulation of fibroblast growth factor receptor signaling pathway	2	0.472813	0.0735253	WNT4, THBS1	341	3	13528	26.4477	1	0.55129	73.9151
GOTERM_BP_FAT	GO:0045765~regulation of angiogenesis	5	1.18203	0.0736266	COL4A2, HIF1A, ID1, F3, THBS1	341	63	13528	3.14854	1	0.550264	73.9652
GOTERM_BP_FAT	GO:0042345~regulation of NF-kappaB import into nucleus	3	0.70922	0.0739692	TNF, RHOA, NFKBIA	341	18	13528	6.61193	1	0.550466	74.1341
GOTERM_BP_FAT	GO:0001837~epithelial to mesenchymal transition	3	0.70922	0.0739692	S100A4, HIF1A, TGFB2	341	18	13528	6.61193	1	0.550466	74.1341
GOTERM_BP_FAT	GO:0065003~macromolecular complex assembly	24	5.67376	0.0744637	EIF6, CAV1, TCP1, TUBB2A, FKBP4, PFKP, BIRC3, FLNA, PICALM, SET, PTRF, C1QTNF1, GOPC, NPM1, SNRPB, TUBB6, CDA, H3F3B, VAMP3, AGRN, HSPD1, AKR1C1, TUBA1C, DCTPP1	341	665	13528	1.43176	1	0.55143	74.3761
GOTERM_BP_FAT	GO:0008361~regulation of cell size	10	2.36407	0.0759677	CDKN1A, PDGFB, TNFRSF12A, CXCL16, NPM1, EDN1, CDA, IL7R, ENO1, TGFB2	341	206	13528	1.9258	1	0.557398	75.099
GOTERM_BP_FAT	GO:0001701~in utero embryonic development	9	2.12766	0.0765021	RPA1, PRMT1, HIF1A, PSMC4, EDN1, MYH9, CAPN2, TPM1, ITGB1	341	176	13528	2.02866	1	0.558511	75.3512
GOTERM_BP_FAT	GO:0051341~regulation of oxidoreductase activity	4	0.945626	0.0786412	EGFR, HIF1A, TNF, EDN1	341	40	13528	3.96716	1	0.567385	76.3367
GOTERM_BP_FAT	GO:0046496~nicotinamide nucleotide metabolic process	4	0.945626	0.0786412	LDHB, TPI1, IDH3B, PNP	341	40	13528	3.96716	1	0.567385	76.3367
GOTERM_BP_FAT	GO:0006769~nicotinamide metabolic process	4	0.945626	0.0786412	LDHB, TPI1, IDH3B, PNP	341	40	13528	3.96716	1	0.567385	76.3367
GOTERM_BP_FAT	GO:0014706~striated muscle tissue development	7	1.65485	0.0795386	CAV1, TNC, RHOA, AGRN, TPM1, ITGB1, TGFB2	341	119	13528	2.33362	1	0.57016	76.7391
GOTERM_BP_FAT	GO:0051436~negative regulation of ubiquitin-protein ligase activity during mitotic cell cycle	5	1.18203	0.0805666	PSMA2, PSMC4, PSMB3, CDC20, PSMA7	341	65	13528	3.05166	1	0.573514	77.192
GOTERM_BP_FAT	GO:0031145~anaphase-promoting complex-dependent proteasomal ubiquitin-dependent protein catabolic process	5	1.18203	0.0805666	PSMA2, PSMC4, PSMB3, CDC20, PSMA7	341	65	13528	3.05166	1	0.573514	77.192
GOTERM_BP_FAT	GO:0050926~regulation of positive chemotaxis	3	0.70922	0.0813409	IL8, F3, F2RL1	341	19	13528	6.26393	1	0.575637	77.5276
GOTERM_BP_FAT	GO:0050927~positive regulation of positive chemotaxis	3	0.70922	0.0813409	IL8, F3, F2RL1	341	19	13528	6.26393	1	0.575637	77.5276
GOTERM_BP_FAT	GO:0035272~exocrine system development	3	0.70922	0.0813409	EGFR, LAMA5, TGFB2	341	19	13528	6.26393	1	0.575637	77.5276
GOTERM_BP_FAT	GO:0051492~regulation of stress fiber formation	3	0.70922	0.0813409	RHOA, TPM1, SYNPO	341	19	13528	6.26393	1	0.575637	77.5276
GOTERM_BP_FAT	GO:0002758~innate immune response-activating signal transduction	3	0.70922	0.0813409	MICA, NFKBIA, HSPD1	341	19	13528	6.26393	1	0.575637	77.5276
GOTERM_BP_FAT	GO:0009203~ribonucleoside triphosphate catabolic process	3	0.70922	0.0813409	ATP5B, OLA1, ACLY	341	19	13528	6.26393	1	0.575637	77.5276
GOTERM_BP_FAT	GO:0002218~activation of innate immune response	3	0.70922	0.0813409	MICA, NFKBIA, HSPD1	341	19	13528	6.26393	1	0.575637	77.5276
GOTERM_BP_FAT	GO:0009207~purine ribonucleoside triphosphate catabolic process	3	0.70922	0.0813409	ATP5B, OLA1, ACLY	341	19	13528	6.26393	1	0.575637	77.5276
GOTERM_BP_FAT	GO:0051347~positive regulation of transferase activity	11	2.60047	0.0816555	EGFR, CCND1, TNF, PDGFB, NPM1, EDN1, PKN1, KITLG, DUSP12, THBS1, TGFB2	341	240	13528	1.81828	1	0.575603	77.6626
GOTERM_BP_FAT	GO:0006446~regulation of translational initiation	4	0.945626	0.0833411	EIF4G2, TNF, EIF4H, HSPB1	341	41	13528	3.8704	1	0.581878	78.3732
GOTERM_BP_FAT	GO:0034329~cell junction assembly	4	0.945626	0.0833411	TLN1, LAMA5, ACTN1, VCL	341	41	13528	3.8704	1	0.581878	78.3732
GOTERM_BP_FAT	GO:0009820~alkaloid metabolic process	4	0.945626	0.0833411	LDHB, TPI1, IDH3B, PNP	341	41	13528	3.8704	1	0.581878	78.3732
GOTERM_BP_FAT	GO:0050714~positive regulation of protein secretion	4	0.945626	0.0833411	TNF, SAA2, PYCARD, TGFB2	341	41	13528	3.8704	1	0.581878	78.3732
GOTERM_BP_FAT	GO:0055114~oxidation reduction	23	5.43735	0.083828	HCCS, LDHB, LDHA, PXDN, GLUD1, EGLN3, FADS3, IDH3B, ALDH1A1, SCCPDH, AKR1C2, PYCR2, SLC1A3, ALDH1B1, PRDX6, AKR1B10, PLOD3, DHCR7, LEPREL1, LOXL2, GAPDH, AKR1C1, DEGS1	341	639	13528	1.42793	1	0.582606	78.5744
GOTERM_BP_FAT	GO:0008283~cell proliferation	17	4.01891	0.0841265	EGFR, CXCL1, PDGFB, FSCN1, KITLG, CD70, IL7R, GAS6, TGFB2, GPC4, ZFP36L2, LAMA5, TGFBI, CKS2, HSPD1, PDZK1, CYR61	341	436	13528	1.54683	1	0.582476	78.697
GOTERM_BP_FAT	GO:0046883~regulation of hormone secretion	5	1.18203	0.0841541	LIF, INHBB, TNF, GLUD1, EDN1	341	66	13528	3.00542	1	0.581121	78.7082
GOTERM_BP_FAT	GO:0000278~mitotic cell cycle	15	3.5461	0.0848872	EGFR, RAN, TUBB2A, NEDD9, CDC20, SUGT1, PSMA7, ITGB1, PSMA2, CCND1, CDKN1A, PSMC4, PSMB3, KPNA2, GADD45A	341	370	13528	1.60831	1	0.582954	79.0061
GOTERM_BP_FAT	GO:0030099~myeloid cell differentiation	6	1.41844	0.0849349	TNF, RELB, BPGM, MYH9, MB, TIMP1	341	93	13528	2.55946	1	0.581701	79.0254
GOTERM_BP_FAT	GO:0045321~leukocyte activation	11	2.60047	0.085183	ICAM1, MICB, YWHAZ, MICA, IL8, RELB, EDN1, HSPD1, MYH9, IL7R, ITGB1	341	242	13528	1.80325	1	0.581352	79.1253
GOTERM_BP_FAT	GO:0051444~negative regulation of ubiquitin-protein ligase activity	5	1.18203	0.0878186	PSMA2, PSMC4, PSMB3, CDC20, PSMA7	341	67	13528	2.96056	1	0.59154	80.1586
GOTERM_BP_FAT	GO:0051352~negative regulation of ligase activity	5	1.18203	0.0878186	PSMA2, PSMC4, PSMB3, CDC20, PSMA7	341	67	13528	2.96056	1	0.59154	80.1586
GOTERM_BP_FAT	GO:0034504~protein localization in nucleus	6	1.41844	0.0879637	TNF, RAN, PTTG1IP, NFKBIA, KPNA2, TGFB2	341	94	13528	2.53223	1	0.590718	80.214
GOTERM_BP_FAT	GO:0019362~pyridine nucleotide metabolic process	4	0.945626	0.0881586	LDHB, TPI1, IDH3B, PNP	341	42	13528	3.77824	1	0.590118	80.2883
GOTERM_BP_FAT	GO:0051385~response to mineralocorticoid stimulus	3	0.70922	0.0889274	CDKN1A, CCND1, FOSL1	341	20	13528	5.95073	1	0.592002	80.5787
GOTERM_BP_FAT	GO:0002685~regulation of leukocyte migration	3	0.70922	0.0889274	ICAM1, F2RL1, THBS1	341	20	13528	5.95073	1	0.592002	80.5787
GOTERM_BP_FAT	GO:0016337~cell-cell adhesion	12	2.83688	0.0892192	EGFR, ICAM1, AMIGO2, EZR, BMP1, TNF, OLR1, CLDN1, L1CAM, MSN, MYH9, ITGB1	341	276	13528	1.72485	1	0.591821	80.6879
GOTERM_BP_FAT	GO:0006006~glucose metabolic process	8	1.89125	0.091372	LDHB, LDHA, TPI1, TNF, PFKP, BPGM, GAPDH, ENO1	341	153	13528	2.07433	1	0.599544	81.4756
GOTERM_BP_FAT	GO:0006732~coenzyme metabolic process	8	1.89125	0.091372	GGT5, LDHB, TPI1, FOLR1, IDH3B, ACLY, GLO1, PNP	341	153	13528	2.07433	1	0.599544	81.4756
GOTERM_BP_FAT	GO:0051437~positive regulation of ubiquitin-protein ligase activity during mitotic cell cycle	5	1.18203	0.0915591	PSMA2, PSMC4, PSMB3, CDC20, PSMA7	341	68	13528	2.91703	1	0.598902	81.5426
GOTERM_BP_FAT	GO:0034599~cellular response to oxidative stress	4	0.945626	0.0930906	PXDN, HIF1A, PRDX6, TPM1	341	43	13528	3.69038	1	0.603864	82.0825
GOTERM_BP_FAT	GO:0007162~negative regulation of cell adhesion	4	0.945626	0.0930906	ATP5B, TGFBI, FXYD5, THBS1	341	43	13528	3.69038	1	0.603864	82.0825
GOTERM_BP_FAT	GO:0042493~response to drug	10	2.36407	0.0952401	CDKN1A, CAV1, CCND1, YWHAZ, SLC1A3, CCL2, CSAG2, FOSL1, PDZK1, PNP	341	216	13528	1.83665	1	0.611252	82.8153
GOTERM_BP_FAT	GO:0060537~muscle tissue development	7	1.65485	0.095292	CAV1, TNC, RHOA, AGRN, TPM1, ITGB1, TGFB2	341	125	13528	2.22161	1	0.610047	82.8326
GOTERM_BP_FAT	GO:0070302~regulation of stress-activated protein kinase signaling pathway	5	1.18203	0.0953746	TNF, EDN1, PKN1, CBS, TGFB2	341	69	13528	2.87475	1	0.608972	82.8602
GOTERM_BP_FAT	GO:0009146~purine nucleoside triphosphate catabolic process	3	0.70922	0.0967134	ATP5B, OLA1, ACLY	341	21	13528	5.66736	1	0.612955	83.3011
GOTERM_BP_FAT	GO:0050792~regulation of viral reproduction	3	0.70922	0.0967134	TNF, IL8, TNIP1	341	21	13528	5.66736	1	0.612955	83.3011
GOTERM_BP_FAT	GO:0032231~regulation of actin filament bundle formation	3	0.70922	0.0967134	RHOA, TPM1, SYNPO	341	21	13528	5.66736	1	0.612955	83.3011
GOTERM_BP_FAT	GO:0030239~myofibril assembly	3	0.70922	0.0967134	ACTG1, TPM1, ITGB1	341	21	13528	5.66736	1	0.612955	83.3011
GOTERM_BP_FAT	GO:0043032~positive regulation of macrophage activation	2	0.472813	0.0968156	HSPD1, THBS1	341	4	13528	19.8358	1	0.611964	83.3343
GOTERM_BP_FAT	GO:0032909~regulation of transforming growth factor-beta2 production	2	0.472813	0.0968156	HIF1A, TGFB2	341	4	13528	19.8358	1	0.611964	83.3343
GOTERM_BP_FAT	GO:0033631~cell-cell adhesion mediated by integrin	2	0.472813	0.0968156	L1CAM, ITGB1	341	4	13528	19.8358	1	0.611964	83.3343
GOTERM_BP_FAT	GO:0002548~monocyte chemotaxis	2	0.472813	0.0968156	CCL2, PDGFB	341	4	13528	19.8358	1	0.611964	83.3343
GOTERM_BP_FAT	GO:0006089~lactate metabolic process	2	0.472813	0.0968156	LDHB, HIF1A	341	4	13528	19.8358	1	0.611964	83.3343
GOTERM_BP_FAT	GO:0051798~positive regulation of hair follicle development	2	0.472813	0.0968156	TNF, TGFB2	341	4	13528	19.8358	1	0.611964	83.3343
GOTERM_BP_FAT	GO:0006091~generation of precursor metabolites and energy	13	3.07329	0.0973413	LDHB, LDHA, TPI1, SLC1A3, ATP5B, GFPT2, PFKP, FADS3, IDH3B, BPGM, ATP6V0D2, GAPDH, ENO1	341	313	13528	1.6477	1	0.612664	83.5041
GOTERM_BP_FAT	GO:0042110~T cell activation	7	1.65485	0.0980692	ICAM1, MICB, MICA, RELB, HSPD1, MYH9, IL7R	341	126	13528	2.20398	1	0.614158	83.7366
GOTERM_BP_FAT	GO:0019221~cytokine-mediated signaling pathway	5	1.18203	0.0992639	KRT18, TNF, CCL2, KRT8, PYCARD	341	70	13528	2.83368	1	0.617463	84.1116
GOTERM_BP_FAT	GO:0051443~positive regulation of ubiquitin-protein ligase activity	5	1.18203	0.0992639	PSMA2, PSMC4, PSMB3, CDC20, PSMA7	341	70	13528	2.83368	1	0.617463	84.1116

## Sheet: up Hx DLD GOs
Category	Term	Count	%	PValue	Genes	List Total	Pop Hits	Pop Total	Fold Enrichment	Bonferroni	Benjamini	FDR
GOTERM_BP_FAT	GO:0000280~nuclear division	40	15.873	4.40297e-30	KIFC1, NEK2, ANLN, AURKA, PTTG1, CEP55, AURKB, CCNG1, FAM83D, KIF2C, CDCA8, NCAPH, RAD21, NCAPG, OIP5, BUB1, CDCA2, CCNA2, CDK1, CDC6, KIF11, CKAP5, DLGAP5, TPX2, CENPF, NUSAP1, CDC20, BIRC5, NDC80, PBK, CDC25C, UBE2C, SMC4, NCAPD2, CCNB1, MAD2L1, CCNB2, SPAG5, KIF20B, BUB1B	215	220	13528	11.4402	7.44983e-27	7.44983e-27	7.42225e-27
GOTERM_BP_FAT	GO:0007067~mitosis	40	15.873	4.40297e-30	KIFC1, NEK2, ANLN, AURKA, PTTG1, CEP55, AURKB, CCNG1, FAM83D, KIF2C, CDCA8, NCAPH, RAD21, NCAPG, OIP5, BUB1, CDCA2, CCNA2, CDK1, CDC6, KIF11, CKAP5, DLGAP5, TPX2, CENPF, NUSAP1, CDC20, BIRC5, NDC80, PBK, CDC25C, UBE2C, SMC4, NCAPD2, CCNB1, MAD2L1, CCNB2, SPAG5, KIF20B, BUB1B	215	220	13528	11.4402	7.44983e-27	7.44983e-27	7.42225e-27
GOTERM_BP_FAT	GO:0000087~M phase of mitotic cell cycle	40	15.873	9.02681e-30	KIFC1, NEK2, ANLN, AURKA, PTTG1, CEP55, AURKB, CCNG1, FAM83D, KIF2C, CDCA8, NCAPH, RAD21, NCAPG, OIP5, BUB1, CDCA2, CCNA2, CDK1, CDC6, KIF11, CKAP5, DLGAP5, TPX2, CENPF, NUSAP1, CDC20, BIRC5, NDC80, PBK, CDC25C, UBE2C, SMC4, NCAPD2, CCNB1, MAD2L1, CCNB2, SPAG5, KIF20B, BUB1B	215	224	13528	11.2359	1.52734e-26	7.63668e-27	1.52168e-26
GOTERM_BP_FAT	GO:0000279~M phase	46	18.254	1.21186e-29	KIFC1, PRC1, NEK2, ANLN, AURKA, PTTG1, CEP55, AURKB, CCNG1, FAM83D, KIF2C, NCAPH, CDCA8, RAD21, NCAPG, OIP5, BUB1, CDCA2, CCNA2, CDK1, CDC6, KIF11, MKI67, CKAP5, SGOL2, DLGAP5, TPX2, CENPF, NUSAP1, CDC20, BIRC5, NDC80, PBK, CDC25C, UBE2C, TACC3, SMC4, NCAPD2, CCNB1, MAD2L1, CCNB2, SPAG5, KIF20B, BUB1B, STMN1, KPNA2	215	329	13528	8.79746	2.05047e-26	6.83491e-27	2.04288e-26
GOTERM_BP_FAT	GO:0000278~mitotic cell cycle	48	19.0476	1.66298e-29	KIFC1, PRC1, NEK2, ANLN, AURKA, PTTG1, CEP55, AURKB, CCNG1, FAM83D, KIF2C, NCAPH, CDCA8, RAD21, OIP5, NCAPG, CENPA, BUB1, CDCA2, CCNA2, RPS27A, CDK1, CDC6, KIF11, CKAP5, DLGAP5, TPX2, CENPF, NUSAP1, CDC20, BIRC5, NDC80, PBK, CDC25C, UBE2C, SMC4, NCAPD2, CCNB1, MAD2L1, CCNB2, PSME1, SPAG5, PSMA3, KIF20B, BUB1B, STMN1, KPNA2, UBE2E1	215	370	13528	8.16272	2.81376e-26	7.0344e-27	2.80334e-26
GOTERM_BP_FAT	GO:0048285~organelle fission	40	15.873	2.16838e-29	KIFC1, NEK2, ANLN, AURKA, PTTG1, CEP55, AURKB, CCNG1, FAM83D, KIF2C, CDCA8, NCAPH, RAD21, NCAPG, OIP5, BUB1, CDCA2, CCNA2, CDK1, CDC6, KIF11, CKAP5, DLGAP5, TPX2, CENPF, NUSAP1, CDC20, BIRC5, NDC80, PBK, CDC25C, UBE2C, SMC4, NCAPD2, CCNB1, MAD2L1, CCNB2, SPAG5, KIF20B, BUB1B	215	229	13528	10.9906	3.66891e-26	7.33781e-27	3.65532e-26
GOTERM_BP_FAT	GO:0051301~cell division	42	16.6667	2.79494e-27	KIFC1, PRC1, NEK2, ANLN, PTTG1, CEP55, KIT, AURKB, CCNG1, TGFB2, FAM83D, TOP1, CDCA8, NCAPH, RAD21, NCAPG, OIP5, BUB1, CDCA2, CCNA2, CDK1, CDC6, KIF11, CKAP5, SGOL2, CENPF, NUSAP1, CDC20, BIRC5, NDC80, RACGAP1, CDC25C, UBE2C, SEPT10, SMC4, NCAPD2, CCNB1, MAD2L1, CCNB2, SPAG5, KIF20B, BUB1B	215	295	13528	8.95823	4.72905e-24	7.88174e-25	4.71154e-24
GOTERM_BP_FAT	GO:0022402~cell cycle process	54	21.4286	8.94453e-27	KIFC1, PRC1, AURKA, PTTG1, AURKB, TGFB2, FAM83D, KIF2C, CDCA8, RAD21, OIP5, CDCA2, CCNA2, RPS27A, CDC6, CDK1, KIF11, SGOL2, TPX2, NUSAP1, PBK, TACC3, UBE2C, NCAPD2, EIF4G2, MAD2L1, PSME1, SPAG5, PSMA3, BUB1B, STMN1, KPNA2, NEK2, ANLN, CEP55, CCNG1, NCAPH, NCAPG, CENPA, BUB1, MKI67, CKAP5, DLGAP5, CENPF, BIRC5, NDC80, CDC20, RACGAP1, CDC25C, SMC4, CCNB1, CCNB2, KIF20B, UBE2E1	215	565	13528	6.01368	1.51341e-23	2.16202e-24	1.50781e-23
GOTERM_BP_FAT	GO:0022403~cell cycle phase	46	18.254	2.45266e-25	KIFC1, PRC1, NEK2, ANLN, AURKA, PTTG1, CEP55, AURKB, CCNG1, FAM83D, KIF2C, NCAPH, CDCA8, RAD21, NCAPG, OIP5, BUB1, CDCA2, CCNA2, CDK1, CDC6, KIF11, MKI67, CKAP5, SGOL2, DLGAP5, TPX2, CENPF, NUSAP1, CDC20, BIRC5, NDC80, PBK, CDC25C, UBE2C, TACC3, SMC4, NCAPD2, CCNB1, MAD2L1, CCNB2, SPAG5, KIF20B, BUB1B, STMN1, KPNA2	215	414	13528	6.99121	4.14989e-22	5.18737e-23	4.13453e-22
GOTERM_BP_FAT	GO:0007049~cell cycle	59	23.4127	2.89009e-24	KIFC1, PRC1, AURKA, PTTG1, AURKB, TGFB2, FAM83D, KIF2C, CDCA8, RAD21, OIP5, CDCA2, CCNA2, RPS27A, CDC6, CDK1, KIF11, SGOL2, TPX2, NUSAP1, PBK, TACC3, UBE2C, NCAPD2, EIF4G2, MAD2L1, PSME1, SPAG5, PSMA3, BUB1B, STMN1, KPNA2, NEK2, ANLN, CEP55, CCNG1, NCAPH, HJURP, NCAPG, CENPA, BUB1, CKAP2, MKI67, CKAP5, DLGAP5, ANXA1, CENPF, BIRC5, NDC80, CDC20, RACGAP1, CDC25C, SEPT10, SMC4, CCNB1, CCNB2, KIF20B,…	215	776	13528	4.78394	4.89003e-21	5.43337e-22	4.87193e-21
GOTERM_BP_FAT	GO:0007059~chromosome segregation	17	6.74603	1.18884e-13	KIFC1, NEK2, SGOL2, DLGAP5, CENPF, NUSAP1, NDC80, BIRC5, PTTG1, SMC4, NCAPD2, NCAPH, RAD21, MAD2L1, NCAPG, HJURP, TOP2A	215	81	13528	13.2056	2.01187e-10	2.01187e-11	2.0044e-10
GOTERM_BP_FAT	GO:0006414~translational elongation	17	6.74603	4.28485e-12	EEF1A1, RPL17, RPL13P12, RPS15A, RPS6, RPL39, RPS4X, RPL13AP5, RPS18, RPS27, RPL30, RPS3AP5, EEF1A1P5, RPS12, RPL11, RPS27A, RPS23, RPS24	215	101	13528	10.5907	7.24987e-09	6.59079e-10	7.22303e-09
GOTERM_BP_FAT	GO:0000070~mitotic sister chromatid segregation	10	3.96825	3.40839e-09	KIFC1, NCAPH, MAD2L1, NEK2, NCAPG, DLGAP5, NUSAP1, NDC80, NCAPD2, SMC4	215	36	13528	17.478	5.76697e-06	4.80582e-07	5.74564e-06
GOTERM_BP_FAT	GO:0007017~microtubule-based process	21	8.33333	3.42333e-09	KIFC1, KIF4A, KIF11, PRC1, CKAP5, NEK2, NUSAP1, AURKA, NDC80, TACC3, UBE2C, KIF2C, SPAG5, CENPA, KIF20B, BUB1B, STMN1, KPNA2, TUBA1B, TUBA1C, KIF20A	215	253	13528	5.22269	5.79226e-06	4.45559e-07	5.77083e-06
GOTERM_BP_FAT	GO:0000819~sister chromatid segregation	10	3.96825	4.4426e-09	KIFC1, NCAPH, MAD2L1, NEK2, NCAPG, DLGAP5, NUSAP1, NDC80, NCAPD2, SMC4	215	37	13528	17.0057	7.51685e-06	5.3692e-07	7.48905e-06
GOTERM_BP_FAT	GO:0006412~translation	22	8.73016	6.56679e-08	EEF1A1, RPL17, DARS, RPL13P12, RPS15A, RPS6, RPL39, RPS4X, RPL13AP5, RPL39P5, EIF4G2, RPS18, RPS27, RPL30, RPS3AP5, EEF1A1P5, EIF4A1, RPS12, RPL11, RPS27A, RPS23, RPL36AL, RPS24	215	331	13528	4.18206	0.000111104	7.40732e-06	0.000110699
GOTERM_BP_FAT	GO:0051726~regulation of cell cycle	22	8.73016	6.56679e-08	BMP4, CDC6, CDK1, NEK2, DLGAP5, CENPF, RPS15A, NUSAP1, BIRC5, ANLN, TACC3, UBE2C, CCNG1, CDC25C, TGFB2, CCNB1, MAD2L1, BUB1, KIF20B, BUB1B, CCNA2, HSPA8	215	331	13528	4.18206	0.000111104	7.40732e-06	0.000110699
GOTERM_BP_FAT	GO:0000226~microtubule cytoskeleton organization	15	5.95238	8.3912e-08	KIF11, PRC1, NEK2, CKAP5, NUSAP1, AURKA, NDC80, TACC3, UBE2C, KIF2C, CENPA, SPAG5, BUB1B, STMN1, TUBA1B	215	147	13528	6.4205	0.000141969	8.87365e-06	0.000141453
GOTERM_BP_FAT	GO:0007346~regulation of mitotic cell cycle	15	5.95238	1.27764e-07	CDK1, CDC6, NEK2, DLGAP5, CENPF, NUSAP1, ANLN, BIRC5, UBE2C, CDC25C, MAD2L1, BUB1, KIF20B, BUB1B, CCNA2	215	152	13528	6.2093	0.000216154	1.27162e-05	0.000215377
GOTERM_BP_FAT	GO:0006323~DNA packaging	13	5.15873	3.21773e-07	HMGB2, NAP1L1, NUSAP1, NCAPD2, SMC4, HIST2H2AB, NCAPH, NCAPG, HJURP, CENPA, SEP15, ASF1B, TOP2A	215	117	13528	6.99121	0.000544292	3.02462e-05	0.000542424
GOTERM_BP_FAT	GO:0008283~cell proliferation	24	9.52381	4.23715e-07	BMP4, MKI67, DLGAP5, MET, HDGF, TPX2, CENPF, KIT, RACGAP1, TACC3, CDC25C, HPRT1, PRDX1, TGFB2, KIF2C, RPS27, CSE1L, TACSTD2, BUB1, BUB1B, HSPD1, AREG, IGFBP4, CYR61	215	436	13528	3.46354	0.00071667	3.77323e-05	0.00071427
GOTERM_BP_FAT	GO:0007051~spindle organization	9	3.57143	4.4845e-07	KIF11, PRC1, SPAG5, BUB1B, NDC80, AURKA, STMN1, UBE2C, TACC3	215	45	13528	12.5842	0.000758489	3.79381e-05	0.000755966
GOTERM_BP_FAT	GO:0051276~chromosome organization	25	9.92063	7.43206e-07	KIFC1, HMGB1, HMGB2, NEK2, NAP1L1, CBX3, PTTG1, HIST2H2AB, NCAPH, CDCA8, CENPA, NCAPG, HJURP, SEP15, ASF1B, TOP2A, SGOL2, DLGAP5, NUSAP1, CENPF, NDC80, NCAPD2, SMC4, MAD2L1, UBE2E1	215	485	13528	3.24335	0.00125671	5.98794e-05	0.00125284
GOTERM_BP_FAT	GO:0031145~anaphase-promoting complex-dependent proteasomal ubiquitin-dependent protein catabolic process	10	3.96825	7.77966e-07	CCNB1, CDK1, MAD2L1, PSME1, PSMA3, BUB1B, CDC20, UBE2C, RPS27A, UBE2E1	215	65	13528	9.68014	0.00131545	5.98309e-05	0.00131144
GOTERM_BP_FAT	GO:0007010~cytoskeleton organization	23	9.12698	1.60869e-06	KIF11, PRC1, CNN3, CKAP5, NEK2, NUSAP1, AURKA, NDC80, ANLN, TMSB10, SOD1, RACGAP1, TACC3, UBE2C, FLNB, KIF2C, PFN2, SPAG5, CENPA, BUB1B, SDCBP, STMN1, TUBA1B	215	436	13528	3.31922	0.00271821	0.000118337	0.0027118
GOTERM_BP_FAT	GO:0051439~regulation of ubiquitin-protein ligase activity during mitotic cell cycle	10	3.96825	1.66968e-06	CCNB1, CDK1, MAD2L1, PSME1, PSMA3, BUB1B, CDC20, UBE2C, RPS27A, UBE2E1	215	71	13528	8.8621	0.00282111	0.000117706	0.0028146
GOTERM_BP_FAT	GO:0051438~regulation of ubiquitin-protein ligase activity	10	3.96825	3.71556e-06	CCNB1, CDK1, MAD2L1, PSME1, PSMA3, BUB1B, CDC20, UBE2C, RPS27A, UBE2E1	215	78	13528	8.06679	0.00626701	0.000251438	0.00626327
GOTERM_BP_FAT	GO:0051340~regulation of ligase activity	10	3.96825	5.102e-06	CCNB1, CDK1, MAD2L1, PSME1, PSMA3, BUB1B, CDC20, UBE2C, RPS27A, UBE2E1	215	81	13528	7.76802	0.00859545	0.000331968	0.00860028
GOTERM_BP_FAT	GO:0010564~regulation of cell cycle process	11	4.36508	1.29227e-05	MAD2L1, NEK2, DLGAP5, KIF20B, BUB1, CENPF, NUSAP1, BIRC5, ANLN, CDC25C, UBE2C	215	114	13528	6.07132	0.021628	0.000809499	0.021782
GOTERM_BP_FAT	GO:0008219~cell death	28	11.1111	2.59723e-05	TNFRSF21, PPT1, KIT, ITM2B, HPRT1, TGFB2, TOP1, RAD21, CSE1L, TMEM123, TOP2A, RPS27A, PHLDA1, CKAP2, SGPL1, OLR1, BIRC5, SOD1, ECT2, YWHAE, TAX1BP1, TNS4, EIF4G2, TNFRSF10D, F3, BUB1B, HSPD1, PERP	215	719	13528	2.45033	0.0429941	0.00156826	0.0437734
GOTERM_BP_FAT	GO:0007088~regulation of mitosis	8	3.1746	2.69973e-05	MAD2L1, NEK2, DLGAP5, KIF20B, BUB1, CENPF, NUSAP1, CDC25C	215	56	13528	8.9887	0.0446525	0.00157394	0.0455006
GOTERM_BP_FAT	GO:0051783~regulation of nuclear division	8	3.1746	2.69973e-05	MAD2L1, NEK2, DLGAP5, KIF20B, BUB1, CENPF, NUSAP1, CDC25C	215	56	13528	8.9887	0.0446525	0.00157394	0.0455006
GOTERM_BP_FAT	GO:0031396~regulation of protein ubiquitination	10	3.96825	2.87055e-05	CCNB1, CDK1, MAD2L1, PSME1, PSMA3, BUB1B, CDC20, UBE2C, RPS27A, UBE2E1	215	100	13528	6.29209	0.0474097	0.0016177	0.0483788
GOTERM_BP_FAT	GO:0016265~death	28	11.1111	2.93175e-05	TNFRSF21, PPT1, KIT, ITM2B, HPRT1, TGFB2, TOP1, RAD21, CSE1L, TMEM123, TOP2A, RPS27A, PHLDA1, CKAP2, SGPL1, OLR1, BIRC5, SOD1, ECT2, YWHAE, TAX1BP1, TNS4, EIF4G2, TNFRSF10D, F3, BUB1B, HSPD1, PERP	215	724	13528	2.43341	0.0483957	0.00159891	0.0494102
GOTERM_BP_FAT	GO:0043161~proteasomal ubiquitin-dependent protein catabolic process	10	3.96825	3.36339e-05	CCNB1, CDK1, MAD2L1, PSME1, PSMA3, BUB1B, CDC20, UBE2C, RPS27A, UBE2E1	215	102	13528	6.16872	0.0553204	0.00177684	0.0566828
GOTERM_BP_FAT	GO:0010498~proteasomal protein catabolic process	10	3.96825	3.36339e-05	CCNB1, CDK1, MAD2L1, PSME1, PSMA3, BUB1B, CDC20, UBE2C, RPS27A, UBE2E1	215	102	13528	6.16872	0.0553204	0.00177684	0.0566828
GOTERM_BP_FAT	GO:0030261~chromosome condensation	6	2.38095	3.88034e-05	NCAPH, NCAPG, NUSAP1, TOP2A, NCAPD2, SMC4	215	25	13528	15.101	0.0635476	0.00198762	0.0653922
GOTERM_BP_FAT	GO:0007076~mitotic chromosome condensation	5	1.98413	3.89232e-05	NCAPH, NCAPG, NUSAP1, NCAPD2, SMC4	215	13	13528	24.2004	0.0637375	0.00193517	0.0655941
GOTERM_BP_FAT	GO:0051436~negative regulation of ubiquitin-protein ligase activity during mitotic cell cycle	8	3.1746	7.18567e-05	MAD2L1, PSME1, PSMA3, BUB1B, CDC20, UBE2C, RPS27A, UBE2E1	215	65	13528	7.74411	0.114485	0.00346786	0.121063
GOTERM_BP_FAT	GO:0051444~negative regulation of ubiquitin-protein ligase activity	8	3.1746	8.73945e-05	MAD2L1, PSME1, PSMA3, BUB1B, CDC20, UBE2C, RPS27A, UBE2E1	215	67	13528	7.51295	0.137464	0.0040993	0.147222
GOTERM_BP_FAT	GO:0051352~negative regulation of ligase activity	8	3.1746	8.73945e-05	MAD2L1, PSME1, PSMA3, BUB1B, CDC20, UBE2C, RPS27A, UBE2E1	215	67	13528	7.51295	0.137464	0.0040993	0.147222
GOTERM_BP_FAT	GO:0051437~positive regulation of ubiquitin-protein ligase activity during mitotic cell cycle	8	3.1746	9.61314e-05	CCNB1, CDK1, PSME1, PSMA3, CDC20, UBE2C, RPS27A, UBE2E1	215	68	13528	7.40246	0.150122	0.00438663	0.161929
GOTERM_BP_FAT	GO:0051640~organelle localization	9	3.57143	0.00010249	CENPA, DLGAP5, ARCN1, COPZ1, CENPF, NUSAP1, BIRC5, NDC80, TACC3	215	92	13528	6.15531	0.159218	0.00455336	0.172632
GOTERM_BP_FAT	GO:0051656~establishment of organelle localization	8	3.1746	0.000105567	CENPA, DLGAP5, ARCN1, COPZ1, CENPF, NUSAP1, BIRC5, NDC80	215	69	13528	7.29518	0.163583	0.00456973	0.177808
GOTERM_BP_FAT	GO:0051443~positive regulation of ubiquitin-protein ligase activity	8	3.1746	0.000115741	CCNB1, CDK1, PSME1, PSMA3, CDC20, UBE2C, RPS27A, UBE2E1	215	70	13528	7.19096	0.177861	0.00488417	0.19493
GOTERM_BP_FAT	GO:0051351~positive regulation of ligase activity	8	3.1746	0.000151142	CCNB1, CDK1, PSME1, PSMA3, CDC20, UBE2C, RPS27A, UBE2E1	215	73	13528	6.89544	0.225665	0.00621842	0.25448
GOTERM_BP_FAT	GO:0031397~negative regulation of protein ubiquitination	8	3.1746	0.000164722	MAD2L1, PSME1, PSMA3, BUB1B, CDC20, UBE2C, RPS27A, UBE2E1	215	74	13528	6.80226	0.243257	0.0066145	0.277315
GOTERM_BP_FAT	GO:0012501~programmed cell death	23	9.12698	0.000275165	CKAP2, SGPL1, TNFRSF21, BIRC5, PPT1, KIT, SOD1, ITM2B, ECT2, YWHAE, TAX1BP1, TNS4, TOP1, RAD21, CSE1L, TNFRSF10D, F3, BUB1B, HSPD1, PERP, TOP2A, RPS27A, PHLDA1	215	611	13528	2.36855	0.372268	0.0107705	0.462845
GOTERM_BP_FAT	GO:0031398~positive regulation of protein ubiquitination	8	3.1746	0.000362885	CCNB1, CDK1, PSME1, PSMA3, CDC20, UBE2C, RPS27A, UBE2E1	215	84	13528	5.99247	0.458879	0.0138601	0.609971
GOTERM_BP_FAT	GO:0000910~cytokinesis	6	2.38095	0.000445632	PRC1, NUSAP1, BIRC5, ANLN, AURKB, RACGAP1	215	41	13528	9.20794	0.529602	0.0166198	0.748569
GOTERM_BP_FAT	GO:0048015~phosphoinositide-mediated signaling	8	3.1746	0.000482263	TYMS, HMGB2, SPAG5, BUB1B, NDC80, AURKA, UBE2C, TOP2A	215	88	13528	5.72008	0.557886	0.0175867	0.809868
GOTERM_BP_FAT	GO:0010941~regulation of cell death	27	10.7143	0.000501902	HMGB1, CDH1, PPT1, KIT, ITM2B, PRDX1, TGFB2, RPL11, NQO1, TOP2A, RPS27A, PHLDA1, BMP4, CDK1, ANXA1, BIRC5, RPS6, SOD1, ECT2, YWHAE, TAX1BP1, EI24, RPS3AP5, TNFRSF10D, F3, HSPD1, PERP	215	815	13528	2.0845	0.572342	0.0179107	0.842717
GOTERM_BP_FAT	GO:0007093~mitotic cell cycle checkpoint	6	2.38095	0.000557937	CDK1, MAD2L1, BUB1, BUB1B, CENPF, CCNA2	215	43	13528	8.77966	0.611045	0.0194805	0.936386
GOTERM_BP_FAT	GO:0000075~cell cycle checkpoint	8	3.1746	0.000590839	CDK1, CDC6, MAD2L1, BUB1, BUB1B, CENPF, BIRC5, CCNA2	215	91	13528	5.53151	0.632119	0.0202012	0.991347
GOTERM_BP_FAT	GO:0031400~negative regulation of protein modification process	9	3.57143	0.000600304	MAD2L1, PSME1, PSMA3, BUB1B, CDC20, UBE2C, YWHAE, RPS27A, UBE2E1	215	119	13528	4.75873	0.637967	0.0201153	1.00715
GOTERM_BP_FAT	GO:0031577~spindle checkpoint	4	1.5873	0.000772824	MAD2L1, BUB1, CENPF, BIRC5	215	12	13528	20.9736	0.729673	0.0253233	1.29483
GOTERM_BP_FAT	GO:0006096~glycolysis	6	2.38095	0.000844745	LDHB, TPI1, LDHA, PGAM1, PGK1, ENO1	215	47	13528	8.03246	0.76067	0.0271237	1.41452
GOTERM_BP_FAT	GO:0006260~DNA replication	11	4.36508	0.000891553	HMGB1, TYMS, CDC6, TOP1, HMGB2, RRM2, NAP1L1, CENPF, PTMS, CDC25C, TOP2A	215	190	13528	3.64279	0.778909	0.0280735	1.49235
GOTERM_BP_FAT	GO:0043067~regulation of programmed cell death	26	10.3175	0.00107324	HMGB1, CDH1, PPT1, KIT, ITM2B, PRDX1, TGFB2, RPL11, NQO1, TOP2A, RPS27A, PHLDA1, CDK1, ANXA1, BIRC5, RPS6, SOD1, ECT2, YWHAE, TAX1BP1, EI24, RPS3AP5, TNFRSF10D, F3, HSPD1, PERP	215	812	13528	2.01471	0.837471	0.0330865	1.79389
GOTERM_BP_FAT	GO:0006259~DNA metabolic process	19	7.53968	0.00114525	HMGB1, CDC6, HMGB2, NAP1L1, CENPF, PPT1, PTTG1, SOD1, CDC25C, TYMS, TOP1, RAD21, RRM2, HSPD1, PTMS, KPNA2, TOP2A, NT5E, IGFBP4	215	506	13528	2.36264	0.856134	0.0346381	1.91316
GOTERM_BP_FAT	GO:0006915~apoptosis	21	8.33333	0.00140971	CKAP2, SGPL1, TNFRSF21, BIRC5, PPT1, SOD1, ITM2B, ECT2, YWHAE, TAX1BP1, TNS4, RAD21, CSE1L, TNFRSF10D, F3, BUB1B, HSPD1, PERP, TOP2A, RPS27A, PHLDA1	215	602	13528	2.19492	0.908087	0.0417278	2.35002
GOTERM_BP_FAT	GO:0010942~positive regulation of cell death	17	6.74603	0.00152403	BMP4, RPS6, SOD1, ITM2B, PRDX1, ECT2, YWHAE, TGFB2, EI24, RPS3AP5, RPL11, HSPD1, NQO1, PERP, TOP2A, RPS27A, PHLDA1	215	435	13528	2.45898	0.924273	0.0442645	2.5383
GOTERM_BP_FAT	GO:0007052~mitotic spindle organization	4	1.5873	0.0015433	KIF11, PRC1, NDC80, STMN1	215	15	13528	16.7789	0.926706	0.0440565	2.57
GOTERM_BP_FAT	GO:0034621~cellular macromolecular complex subunit organization	15	5.95238	0.00165527	KIF2C, HIST2H2AB, HMGB2, HSP90AA1, CSE1L, CENPA, HJURP, NAP1L1, CENPF, ANLN, STMN1, HSPD1, ASF1B, TUBA1B, TUBA1C	215	357	13528	2.64374	0.939374	0.0463982	2.75402
GOTERM_BP_FAT	GO:0006458~'de novo' protein folding	4	1.5873	0.00187741	SEP15, ERO1L, HSPD1, HSPA8	215	16	13528	15.7302	0.958397	0.0516132	3.11815
GOTERM_BP_FAT	GO:0042981~regulation of apoptosis	25	9.92063	0.00204288	HMGB1, CDH1, PPT1, ITM2B, PRDX1, TGFB2, RPL11, NQO1, TOP2A, RPS27A, PHLDA1, CDK1, ANXA1, BIRC5, SOD1, RPS6, ECT2, YWHAE, TAX1BP1, EI24, RPS3AP5, TNFRSF10D, F3, HSPD1, PERP	215	804	13528	1.9565	0.968573	0.0551439	3.38853
GOTERM_BP_FAT	GO:0007018~microtubule-based movement	8	3.1746	0.00210601	KIF2C, KIFC1, KIF4A, KIF11, KIF20B, TUBA1B, TUBA1C, KIF20A	215	113	13528	4.45458	0.971763	0.0559106	3.49152
GOTERM_BP_FAT	GO:0006007~glucose catabolic process	6	2.38095	0.00219301	LDHB, TPI1, LDHA, PGAM1, PGK1, ENO1	215	58	13528	6.50906	0.975636	0.0572579	3.63324
GOTERM_BP_FAT	GO:0032269~negative regulation of cellular protein metabolic process	10	3.96825	0.0022867	MAD2L1, PSME1, PSMA3, BUB1B, CDC20, UBE2C, YWHAE, SRP9, RPS27A, UBE2E1	215	180	13528	3.49561	0.979215	0.0587288	3.78568
GOTERM_BP_FAT	GO:0051248~negative regulation of protein metabolic process	10	3.96825	0.00295632	MAD2L1, PSME1, PSMA3, BUB1B, CDC20, UBE2C, YWHAE, SRP9, RPS27A, UBE2E1	215	187	13528	3.36476	0.993326	0.0741743	4.86846
GOTERM_BP_FAT	GO:0065004~protein-DNA complex assembly	7	2.77778	0.00318889	HIST2H2AB, HMGB2, HJURP, CENPA, NAP1L1, CENPF, ASF1B	215	91	13528	4.84007	0.995502	0.0786195	5.24184
GOTERM_BP_FAT	GO:0043065~positive regulation of apoptosis	16	6.34921	0.00352275	RPS6, SOD1, ITM2B, ECT2, YWHAE, PRDX1, TGFB2, EI24, RPS3AP5, RPL11, HSPD1, NQO1, PERP, TOP2A, RPS27A, PHLDA1	215	430	13528	2.34124	0.997448	0.0852639	5.77543
GOTERM_BP_FAT	GO:0043068~positive regulation of programmed cell death	16	6.34921	0.00371816	RPS6, SOD1, ITM2B, ECT2, YWHAE, PRDX1, TGFB2, EI24, RPS3AP5, RPL11, HSPD1, NQO1, PERP, TOP2A, RPS27A, PHLDA1	215	433	13528	2.32502	0.998169	0.0885231	6.08643
GOTERM_BP_FAT	GO:0043086~negative regulation of catalytic activity	12	4.7619	0.00465095	MAD2L1, PSME1, PSMA3, BUB1B, BIRC5, CDC20, NQO1, UBE2C, RPS27A, UBE2E1, TGFB2, DUSP6	215	277	13528	2.72582	0.999625	0.108024	7.55772
GOTERM_BP_FAT	GO:0019320~hexose catabolic process	6	2.38095	0.00467726	LDHB, TPI1, LDHA, PGAM1, PGK1, ENO1	215	69	13528	5.47139	0.999641	0.107136	7.5989
GOTERM_BP_FAT	GO:0034622~cellular macromolecular complex assembly	13	5.15873	0.00475557	HIST2H2AB, HMGB2, HSP90AA1, CSE1L, CENPA, HJURP, NAP1L1, CENPF, ANLN, HSPD1, ASF1B, TUBA1B, TUBA1C	215	318	13528	2.57224	0.999686	0.107385	7.72137
GOTERM_BP_FAT	GO:0030071~regulation of mitotic metaphase/anaphase transition	4	1.5873	0.00481484	MAD2L1, DLGAP5, BUB1, CENPF	215	22	13528	11.4402	0.999716	0.107226	7.81396
GOTERM_BP_FAT	GO:0046365~monosaccharide catabolic process	6	2.38095	0.00528304	LDHB, TPI1, LDHA, PGAM1, PGK1, ENO1	215	71	13528	5.31726	0.999872	0.115538	8.54236
GOTERM_BP_FAT	GO:0006266~DNA ligation	3	1.19048	0.00654987	HMGB1, HMGB2, TOP2A	215	8	13528	23.5953	0.999985	0.139511	10.4861
GOTERM_BP_FAT	GO:0040001~establishment of mitotic spindle localization	3	1.19048	0.00654987	CENPA, NUSAP1, NDC80	215	8	13528	23.5953	0.999985	0.139511	10.4861
GOTERM_BP_FAT	GO:0044092~negative regulation of molecular function	13	5.15873	0.00695851	CDC20, BIRC5, UBE2C, TGFB2, MAD2L1, PSME1, PSMA3, BUB1B, NQO1, CALM2, RPS27A, UBE2E1, DUSP6	215	334	13528	2.44902	0.999993	0.145751	11.1048
GOTERM_BP_FAT	GO:0031399~regulation of protein modification process	12	4.7619	0.0073728	CCNB1, BMP4, CDK1, MAD2L1, PSME1, PSMA3, BUB1B, CDC20, UBE2C, YWHAE, RPS27A, UBE2E1	215	295	13528	2.5595	0.999996	0.151894	11.7279
GOTERM_BP_FAT	GO:0016052~carbohydrate catabolic process	7	2.77778	0.00767257	LDHB, TPI1, LDHA, PGAM1, PGK1, FUCA1, ENO1	215	109	13528	4.04079	0.999998	0.1557	12.1762
GOTERM_BP_FAT	GO:0033043~regulation of organelle organization	10	3.96825	0.00770028	PFN2, MAD2L1, NEK2, DLGAP5, KIF20B, BUB1, CENPF, NUSAP1, TMSB10, CDC25C	215	217	13528	2.89958	0.999998	0.154378	12.2176
GOTERM_BP_FAT	GO:0043933~macromolecular complex subunit organization	21	8.33333	0.00891761	HMGB2, HSP90AA1, DARS, NAP1L1, CENPF, CDH1, ANLN, HPRT1, IRS1, HIST2H2AB, KIF2C, CSE1L, HJURP, CENPA, RRM2, QPRT, STMN1, HSPD1, ASF1B, TUBA1B, TUBA1C	215	710	13528	1.86104	1	0.174571	14.0154
GOTERM_BP_FAT	GO:0046164~alcohol catabolic process	6	2.38095	0.0091618	LDHB, TPI1, LDHA, PGAM1, PGK1, ENO1	215	81	13528	4.66081	1	0.17689	14.3718
GOTERM_BP_FAT	GO:0031401~positive regulation of protein modification process	9	3.57143	0.00989693	CCNB1, BMP4, CDK1, PSME1, PSMA3, CDC20, UBE2C, RPS27A, UBE2E1	215	187	13528	3.02828	1	0.187603	15.4365
GOTERM_BP_FAT	GO:0051293~establishment of spindle localization	3	1.19048	0.0103095	CENPA, NUSAP1, NDC80	215	10	13528	18.8763	1	0.192517	16.0286
GOTERM_BP_FAT	GO:0051653~spindle localization	3	1.19048	0.0103095	CENPA, NUSAP1, NDC80	215	10	13528	18.8763	1	0.192517	16.0286
GOTERM_BP_FAT	GO:0006334~nucleosome assembly	6	2.38095	0.0106295	HIST2H2AB, HMGB2, HJURP, CENPA, NAP1L1, ASF1B	215	84	13528	4.49435	1	0.195752	16.4851
GOTERM_BP_FAT	GO:0044275~cellular carbohydrate catabolic process	6	2.38095	0.0111525	LDHB, TPI1, LDHA, PGAM1, PGK1, ENO1	215	85	13528	4.44148	1	0.202206	17.2261
GOTERM_BP_FAT	GO:0032270~positive regulation of cellular protein metabolic process	10	3.96825	0.0119262	CCNB1, BMP4, CDK1, PSME1, PSMA3, CDC20, RPS4X, UBE2C, RPS27A, UBE2E1	215	233	13528	2.70047	1	0.21245	18.3112
GOTERM_BP_FAT	GO:0031497~chromatin assembly	6	2.38095	0.0122505	HIST2H2AB, HMGB2, HJURP, CENPA, NAP1L1, ASF1B	215	87	13528	4.33937	1	0.215344	18.762
GOTERM_BP_FAT	GO:0007094~mitotic cell cycle spindle assembly checkpoint	3	1.19048	0.0124702	MAD2L1, BUB1, CENPF	215	11	13528	17.1603	1	0.216551	19.0661
GOTERM_BP_FAT	GO:0045841~negative regulation of mitotic metaphase/anaphase transition	3	1.19048	0.0124702	MAD2L1, BUB1, CENPF	215	11	13528	17.1603	1	0.216551	19.0661
GOTERM_BP_FAT	GO:0045787~positive regulation of cell cycle	5	1.98413	0.0125096	DLGAP5, NUSAP1, RPS15A, BIRC5, TGFB2	215	57	13528	5.51938	1	0.214977	19.1204
GOTERM_BP_FAT	GO:0045839~negative regulation of mitosis	3	1.19048	0.0148097	MAD2L1, BUB1, CENPF	215	12	13528	15.7302	1	0.246975	22.2382
GOTERM_BP_FAT	GO:0051784~negative regulation of nuclear division	3	1.19048	0.0148097	MAD2L1, BUB1, CENPF	215	12	13528	15.7302	1	0.246975	22.2382
GOTERM_BP_FAT	GO:0007096~regulation of exit from mitosis	3	1.19048	0.0148097	BIRC5, ANLN, UBE2C	215	12	13528	15.7302	1	0.246975	22.2382
GOTERM_BP_FAT	GO:0006511~ubiquitin-dependent protein catabolic process	10	3.96825	0.0148817	CCNB1, CDK1, MAD2L1, PSME1, PSMA3, BUB1B, CDC20, UBE2C, RPS27A, UBE2E1	215	242	13528	2.60004	1	0.245635	22.3339
GOTERM_BP_FAT	GO:0051247~positive regulation of protein metabolic process	10	3.96825	0.0153323	CCNB1, BMP4, CDK1, PSME1, PSMA3, CDC20, RPS4X, UBE2C, RPS27A, UBE2E1	215	243	13528	2.58934	1	0.249705	22.9307
GOTERM_BP_FAT	GO:0006333~chromatin assembly or disassembly	7	2.77778	0.0155322	HIST2H2AB, HMGB2, HJURP, CENPA, NAP1L1, CBX3, ASF1B	215	127	13528	3.46808	1	0.250163	23.194
GOTERM_BP_FAT	GO:0034728~nucleosome organization	6	2.38095	0.0159792	HIST2H2AB, HMGB2, HJURP, CENPA, NAP1L1, ASF1B	215	93	13528	4.05941	1	0.254027	23.7797
GOTERM_BP_FAT	GO:0046907~intracellular transport	19	7.53968	0.0166083	ARL6IP1, KIF4A, HSP90AA1, COPZ1, YWHAE, HNRNPA1, TGFB2, CSE1L, ARCN1, YWHAQ, USO1, THOC7, SDCBP, RPL11, GOLGA5, KPNA2, SRP9, HSPA8, RHOBTB3	215	657	13528	1.81963	1	0.260263	24.597
GOTERM_BP_FAT	GO:0006916~anti-apoptosis	9	3.57143	0.0168956	CDK1, HMGB1, TNFRSF10D, F3, ANXA1, BIRC5, SOD1, TAX1BP1, RPS27A	215	206	13528	2.74897	1	0.261763	24.9675
GOTERM_BP_FAT	GO:0051084~'de novo' posttranslational protein folding	3	1.19048	0.0173218	SEP15, ERO1L, HSPA8	215	13	13528	14.5202	1	0.265065	25.514
GOTERM_BP_FAT	GO:0065003~macromolecular complex assembly	19	7.53968	0.0185374	HMGB2, HSP90AA1, DARS, NAP1L1, CENPF, CDH1, ANLN, HPRT1, IRS1, HIST2H2AB, CSE1L, HJURP, CENPA, RRM2, QPRT, HSPD1, ASF1B, TUBA1B, TUBA1C	215	665	13528	1.79774	1	0.278475	27.0521
GOTERM_BP_FAT	GO:0032268~regulation of cellular protein metabolic process	15	5.95238	0.0189021	BMP4, CDK1, CDC20, UBE2C, RPS4X, YWHAE, CCNB1, EIF4G2, MAD2L1, PSME1, PSMA3, BUB1B, SRP9, RPS27A, UBE2E1	215	474	13528	1.99117	1	0.280698	27.5076
GOTERM_BP_FAT	GO:0006268~DNA unwinding during replication	3	1.19048	0.0200006	HMGB1, TOP1, HMGB2	215	14	13528	13.4831	1	0.291988	28.8639
GOTERM_BP_FAT	GO:0006605~protein targeting	9	3.57143	0.0212081	ARL6IP1, CSE1L, YWHAQ, SDCBP, RPL11, KPNA2, YWHAE, SRP9, TGFB2	215	215	13528	2.6339	1	0.304205	30.327
GOTERM_BP_FAT	GO:0050000~chromosome localization	3	1.19048	0.0228402	DLGAP5, CENPF, BIRC5	215	15	13528	12.5842	1	0.320955	32.2599
GOTERM_BP_FAT	GO:0051303~establishment of chromosome localization	3	1.19048	0.0228402	DLGAP5, CENPF, BIRC5	215	15	13528	12.5842	1	0.320955	32.2599
GOTERM_BP_FAT	GO:0051329~interphase of mitotic cell cycle	6	2.38095	0.023747	CCNB1, CDC6, CENPF, BIRC5, CDC25C, KPNA2	215	103	13528	3.6653	1	0.32879	33.3118
GOTERM_BP_FAT	GO:0032386~regulation of intracellular transport	5	1.98413	0.025969	BMP4, CDH1, TACC3, PRDX1, CALM2	215	71	13528	4.43105	1	0.350943	35.8249
GOTERM_BP_FAT	GO:0051325~interphase	6	2.38095	0.0264795	CCNB1, CDC6, CENPF, BIRC5, CDC25C, KPNA2	215	106	13528	3.56156	1	0.353775	36.3894
GOTERM_BP_FAT	GO:0043069~negative regulation of programmed cell death	12	4.7619	0.027638	CDK1, HMGB1, TNFRSF10D, F3, ANXA1, PPT1, BIRC5, KIT, HSPD1, SOD1, TAX1BP1, RPS27A	215	359	13528	2.10321	1	0.363415	37.6536
GOTERM_BP_FAT	GO:0060548~negative regulation of cell death	12	4.7619	0.028407	CDK1, HMGB1, TNFRSF10D, F3, ANXA1, PPT1, BIRC5, KIT, HSPD1, SOD1, TAX1BP1, RPS27A	215	360	13528	2.09736	1	0.36872	38.4796
GOTERM_BP_FAT	GO:0034613~cellular protein localization	13	5.15873	0.0307044	ARL6IP1, COPZ1, AURKB, YWHAE, TGFB2, CSE1L, ARCN1, USO1, YWHAQ, SDCBP, RPL11, KPNA2, SRP9	215	411	13528	1.9902	1	0.389295	40.8863
GOTERM_BP_FAT	GO:0030951~establishment or maintenance of microtubule cytoskeleton polarity	2	0.793651	0.031389	KIF2C, CKAP5	215	2	13528	62.9209	1	0.393254	41.5862
GOTERM_BP_FAT	GO:0030952~establishment or maintenance of cytoskeleton polarity	2	0.793651	0.031389	KIF2C, CKAP5	215	2	13528	62.9209	1	0.393254	41.5862
GOTERM_BP_FAT	GO:0006288~base-excision repair, DNA ligation	2	0.793651	0.031389	HMGB1, HMGB2	215	2	13528	62.9209	1	0.393254	41.5862
GOTERM_BP_FAT	GO:0070727~cellular macromolecule localization	13	5.15873	0.0318364	ARL6IP1, COPZ1, AURKB, YWHAE, TGFB2, CSE1L, ARCN1, USO1, YWHAQ, SDCBP, RPL11, KPNA2, SRP9	215	414	13528	1.97578	1	0.394822	42.0394
GOTERM_BP_FAT	GO:0042306~regulation of protein import into nucleus	4	1.5873	0.0321499	BMP4, CDH1, TACC3, PRDX1	215	44	13528	5.72008	1	0.395073	42.355
GOTERM_BP_FAT	GO:0032508~DNA duplex unwinding	3	1.19048	0.0322674	HMGB1, TOP1, HMGB2	215	18	13528	10.4868	1	0.393452	42.4729
GOTERM_BP_FAT	GO:0032392~DNA geometric change	3	1.19048	0.0322674	HMGB1, TOP1, HMGB2	215	18	13528	10.4868	1	0.393452	42.4729
GOTERM_BP_FAT	GO:0044271~nitrogen compound biosynthetic process	11	4.36508	0.033907	TYMS, ATP1B1, RRM2, CPOX, AZIN1, QPRT, HPRT1, NQO1, NT5E, PAICS, TGFB2	215	325	13528	2.12963	1	0.406147	44.094
GOTERM_BP_FAT	GO:0006886~intracellular protein transport	12	4.7619	0.0359582	ARL6IP1, CSE1L, ARCN1, COPZ1, YWHAQ, USO1, SDCBP, RPL11, KPNA2, YWHAE, SRP9, TGFB2	215	374	13528	2.01885	1	0.42209	46.0616
GOTERM_BP_FAT	GO:0043085~positive regulation of catalytic activity	15	5.95238	0.0369347	CDK1, MET, CDC20, KIT, SOD1, UBE2C, IRS1, TGFB2, CCNB1, PSME1, F3, PSMA3, HSPD1, RPS27A, UBE2E1	215	520	13528	1.81503	1	0.427973	46.9753
GOTERM_BP_FAT	GO:0008104~protein localization	22	8.73016	0.0397218	ARL6IP1, SGOL2, COPZ1, CENPF, NDC80, TMSB10, PPT1, AURKB, TACC3, FLNB, YWHAE, TGFB2, TNS4, CSE1L, ARCN1, YWHAQ, USO1, SDCBP, RPL11, KPNA2, SRP9, KIF20A	215	882	13528	1.56946	1	0.449183	49.5036
GOTERM_BP_FAT	GO:0045185~maintenance of protein location	4	1.5873	0.0401181	TMSB10, NDC80, TACC3, FLNB	215	48	13528	5.24341	1	0.449667	49.8537
GOTERM_BP_FAT	GO:0010605~negative regulation of macromolecule metabolic process	19	7.53968	0.0431615	BMP4, CDC6, HMGB1, HMGB2, S100A11, CENPF, CBX3, CDC20, UBE2C, YWHAE, MAD2L1, PSME1, PSMA3, YWHAQ, BUB1B, RPS27A, SRP9, UBE2E1, ENO1	215	734	13528	1.62874	1	0.47168	52.4676
GOTERM_BP_FAT	GO:0043623~cellular protein complex assembly	7	2.77778	0.044077	HSP90AA1, CSE1L, CENPF, ANLN, HSPD1, TUBA1B, TUBA1C	215	162	13528	2.71881	1	0.476057	53.2285
GOTERM_BP_FAT	GO:0044093~positive regulation of molecular function	16	6.34921	0.0456541	CDK1, MET, CDC20, KIT, SOD1, UBE2C, IRS1, TGFB2, CCNB1, PSME1, F3, PSMA3, HSPD1, CALM2, RPS27A, UBE2E1	215	586	13528	1.71798	1	0.485427	54.5124
GOTERM_BP_FAT	GO:0006997~nucleus organization	4	1.5873	0.048988	SEP15, PPT1, SOD1, TOP2A	215	52	13528	4.84007	1	0.507481	57.1182
GOTERM_BP_FAT	GO:0022411~cellular component disassembly	4	1.5873	0.0513431	KIF2C, PPT1, STMN1, SOD1	215	53	13528	4.74875	1	0.521472	58.8736
GOTERM_BP_FAT	GO:0033157~regulation of intracellular protein transport	4	1.5873	0.0513431	BMP4, CDH1, TACC3, PRDX1	215	53	13528	4.74875	1	0.521472	58.8736
GOTERM_BP_FAT	GO:0030335~positive regulation of cell migration	5	1.98413	0.0525778	ADAM10, F3, KIT, IRS1, TGFB2	215	89	13528	3.53488	1	0.527191	59.7667
GOTERM_BP_FAT	GO:0043066~negative regulation of apoptosis	11	4.36508	0.055265	CDK1, HMGB1, TNFRSF10D, F3, ANXA1, PPT1, BIRC5, HSPD1, SOD1, TAX1BP1, RPS27A	215	354	13528	1.95517	1	0.542531	61.6477
GOTERM_BP_FAT	GO:0010948~negative regulation of cell cycle process	3	1.19048	0.0588911	MAD2L1, BUB1, CENPF	215	25	13528	7.55051	1	0.56317	64.0551
GOTERM_BP_FAT	GO:0051261~protein depolymerization	2	0.793651	0.0617972	KIF2C, STMN1	215	4	13528	31.4605	1	0.578295	65.881
GOTERM_BP_FAT	GO:0007019~microtubule depolymerization	2	0.793651	0.0617972	KIF2C, STMN1	215	4	13528	31.4605	1	0.578295	65.881
GOTERM_BP_FAT	GO:0051103~DNA ligation during DNA repair	2	0.793651	0.0617972	HMGB1, HMGB2	215	4	13528	31.4605	1	0.578295	65.881
GOTERM_BP_FAT	GO:0031536~positive regulation of exit from mitosis	2	0.793651	0.0617972	BIRC5, UBE2C	215	4	13528	31.4605	1	0.578295	65.881
GOTERM_BP_FAT	GO:0051299~centrosome separation	2	0.793651	0.0617972	KIF11, NEK2	215	4	13528	31.4605	1	0.578295	65.881
GOTERM_BP_FAT	GO:0007095~mitotic cell cycle G2/M transition DNA damage checkpoint	2	0.793651	0.0617972	CDK1, CCNA2	215	4	13528	31.4605	1	0.578295	65.881
GOTERM_BP_FAT	GO:0051300~spindle pole body organization	2	0.793651	0.0617972	KIF11, CKAP5	215	4	13528	31.4605	1	0.578295	65.881
GOTERM_BP_FAT	GO:0030262~apoptotic nuclear changes	3	1.19048	0.0631519	PPT1, SOD1, TOP2A	215	26	13528	7.26011	1	0.583555	66.7021
GOTERM_BP_FAT	GO:0046822~regulation of nucleocytoplasmic transport	4	1.5873	0.0639176	BMP4, CDH1, TACC3, PRDX1	215	58	13528	4.33937	1	0.585216	67.1579
GOTERM_BP_FAT	GO:0032535~regulation of cellular component size	9	3.57143	0.0664086	PFN2, EI24, ADAM10, TMEM123, PPT1, TMSB10, CCNG1, ENO1, TGFB2	215	271	13528	2.08962	1	0.596809	68.6005
GOTERM_BP_FAT	GO:0006917~induction of apoptosis	10	3.96825	0.0678505	EI24, RPS3AP5, RPL11, ITM2B, PERP, PRDX1, YWHAE, ECT2, RPS27A, PHLDA1	215	320	13528	1.96628	1	0.602109	69.4081
GOTERM_BP_FAT	GO:0044265~cellular macromolecule catabolic process	18	7.14286	0.0678712	CDK1, ADAM10, ENC1, UFC1, CDC20, PPT1, SOD1, UBE2C, CCNB1, MAD2L1, PSME1, PNRC2, PSMA3, BUB1B, UBE2S, RPS27A, UBE2T, UBE2E1	215	725	13528	1.56217	1	0.599394	69.4195
GOTERM_BP_FAT	GO:0030163~protein catabolic process	16	6.34921	0.0690315	CDK1, ADAM10, ENC1, UFC1, CDC20, PPT1, UBE2C, CCNB1, MAD2L1, PSME1, PSMA3, BUB1B, UBE2S, RPS27A, UBE2T, UBE2E1	215	622	13528	1.61854	1	0.603025	70.0549
GOTERM_BP_FAT	GO:0012502~induction of programmed cell death	10	3.96825	0.0691035	EI24, RPS3AP5, RPL11, ITM2B, PERP, PRDX1, YWHAE, ECT2, RPS27A, PHLDA1	215	321	13528	1.96015	1	0.600633	70.0939
GOTERM_BP_FAT	GO:0040017~positive regulation of locomotion	5	1.98413	0.0698854	ADAM10, F3, KIT, IRS1, TGFB2	215	98	13528	3.21025	1	0.602143	70.5146
GOTERM_BP_FAT	GO:0051272~positive regulation of cell motion	5	1.98413	0.0698854	ADAM10, F3, KIT, IRS1, TGFB2	215	98	13528	3.21025	1	0.602143	70.5146
GOTERM_BP_FAT	GO:0009057~macromolecule catabolic process	19	7.53968	0.0699365	CDK1, ADAM10, ENC1, UFC1, CDC20, PPT1, SOD1, UBE2C, FUCA1, CCNB1, MAD2L1, PSME1, PNRC2, PSMA3, BUB1B, UBE2S, RPS27A, UBE2T, UBE2E1	215	781	13528	1.53073	1	0.599675	70.5419
GOTERM_BP_FAT	GO:0002520~immune system development	9	3.57143	0.0723723	BMP4, SGPL1, TWSG1, CCNB2, KIT, HSPD1, SOD1, TACC3, TGFB2	215	276	13528	2.05177	1	0.609983	71.8158
GOTERM_BP_FAT	GO:0048872~homeostasis of number of cells	5	1.98413	0.0740844	BMP4, CCNB2, SOD1, PRDX1, RPS24	215	100	13528	3.14605	1	0.616196	72.6799
GOTERM_BP_FAT	GO:0009165~nucleotide biosynthetic process	7	2.77778	0.0755056	TYMS, ATP1B1, RRM2, QPRT, HPRT1, NT5E, PAICS	215	186	13528	2.36799	1	0.620768	73.3783
GOTERM_BP_FAT	GO:0042026~protein refolding	2	0.793651	0.076643	HSP90AA1, HSPD1	215	5	13528	25.1684	1	0.623815	73.9251
GOTERM_BP_FAT	GO:0019932~second-messenger-mediated signaling	8	3.1746	0.0790714	TYMS, HMGB2, SPAG5, BUB1B, NDC80, AURKA, UBE2C, TOP2A	215	235	13528	2.14199	1	0.633111	75.0573
GOTERM_BP_FAT	GO:0051235~maintenance of location	4	1.5873	0.0806833	TMSB10, NDC80, TACC3, FLNB	215	64	13528	3.93256	1	0.638215	75.7831
GOTERM_BP_FAT	GO:0042990~regulation of transcription factor import into nucleus	3	1.19048	0.0811623	CDH1, TACC3, PRDX1	215	30	13528	6.29209	1	0.637869	75.9949
GOTERM_BP_FAT	GO:0021537~telencephalon development	4	1.5873	0.0836459	BMP4, HPRT1, TACC3, YWHAE	215	65	13528	3.87206	1	0.646845	77.0656
GOTERM_BP_FAT	GO:0019318~hexose metabolic process	7	2.77778	0.084945	LDHB, TPI1, LDHA, PGAM1, PGK1, FUCA1, ENO1	215	192	13528	2.29399	1	0.650186	77.6076
GOTERM_BP_FAT	GO:0034654~nucleobase, nucleoside, nucleotide and nucleic acid biosynthetic process	7	2.77778	0.0865875	TYMS, ATP1B1, RRM2, QPRT, HPRT1, NT5E, PAICS	215	193	13528	2.28211	1	0.654986	78.2756
GOTERM_BP_FAT	GO:0034404~nucleobase, nucleoside and nucleotide biosynthetic process	7	2.77778	0.0865875	TYMS, ATP1B1, RRM2, QPRT, HPRT1, NT5E, PAICS	215	193	13528	2.28211	1	0.654986	78.2756
GOTERM_BP_FAT	GO:0001558~regulation of cell growth	7	2.77778	0.0883503	EI24, ADAM10, PPT1, IGFBP4, CYR61, ENO1, TGFB2	215	194	13528	2.27034	1	0.660192	78.9716
GOTERM_BP_FAT	GO:0051789~response to protein stimulus	5	1.98413	0.0897557	HSP90AA1, ERO1L, HSPD1, HSPA8, CYR61	215	107	13528	2.94023	1	0.663736	79.5115
GOTERM_BP_FAT	GO:0051297~centrosome organization	3	1.19048	0.090691	KIF11, NEK2, CKAP5	215	32	13528	5.89884	1	0.665219	79.8635
GOTERM_BP_FAT	GO:0000132~establishment of mitotic spindle orientation	2	0.793651	0.0912551	CENPA, NDC80	215	6	13528	20.9736	1	0.665119	80.073
GOTERM_BP_FAT	GO:0007089~traversing start control point of mitotic cell cycle	2	0.793651	0.0912551	CDC6, CDC25C	215	6	13528	20.9736	1	0.665119	80.073
GOTERM_BP_FAT	GO:0034508~centromere complex assembly	2	0.793651	0.0912551	HJURP, CENPF	215	6	13528	20.9736	1	0.665119	80.073
GOTERM_BP_FAT	GO:0051294~establishment of spindle orientation	2	0.793651	0.0912551	CENPA, NDC80	215	6	13528	20.9736	1	0.665119	80.073
GOTERM_BP_FAT	GO:0040008~regulation of growth	10	3.96825	0.092489	SGPL1, EI24, ADAM10, PPT1, SOD1, RPS27A, IGFBP4, CYR61, ENO1, TGFB2	215	341	13528	1.84519	1	0.667816	80.5243
GOTERM_BP_FAT	GO:0030900~forebrain development	6	2.38095	0.0936868	BMP4, TWSG1, CDH1, HPRT1, TACC3, YWHAE	215	152	13528	2.48372	1	0.670315	80.9531
GOTERM_BP_FAT	GO:0051603~proteolysis involved in cellular protein catabolic process	15	5.95238	0.0947231	CDK1, ADAM10, ENC1, UFC1, CDC20, UBE2C, CCNB1, MAD2L1, PSME1, PSMA3, BUB1B, UBE2S, RPS27A, UBE2T, UBE2E1	215	600	13528	1.57302	1	0.672114	81.3169
GOTERM_BP_FAT	GO:0006612~protein targeting to membrane	3	1.19048	0.0955728	ARL6IP1, SDCBP, SRP9	215	33	13528	5.72008	1	0.673134	81.6103
GOTERM_BP_FAT	GO:0006006~glucose metabolic process	6	2.38095	0.0956775	LDHB, TPI1, LDHA, PGAM1, PGK1, ENO1	215	153	13528	2.46749	1	0.671158	81.6462
GOTERM_BP_FAT	GO:0044257~cellular protein catabolic process	15	5.95238	0.0976129	CDK1, ADAM10, ENC1, UFC1, CDC20, UBE2C, CCNB1, MAD2L1, PSME1, PSMA3, BUB1B, UBE2S, RPS27A, UBE2T, UBE2E1	215	603	13528	1.5652	1	0.67648	82.2972

## Sheet: up Hx LNCaP GOs
Category	Term	Count	%	PValue	Genes	List Total	Pop Hits	Pop Total	Fold Enrichment	Bonferroni	Benjamini	FDR
GOTERM_BP_FAT	GO:0042981~regulation of apoptosis	33	9.62099	0.000206936	APH1B, CDH1, BCL2L1, ITM2B, MIF, GPX1, PEA15, PRUNE2, ALDH1A3, RAC1, TNFRSF19, NOS3, DLG5, THBS1, DHCR24, IRAK1, NACC1, PTPRF, ARHGEF9, TAX1BP1, DUSP1, BTG1, IGF2R, LYST, ENDOG, IFT57, RIPK2, MAPK8IP1, PERP, UNC13B, IGFBP3, IFI6, BARD1	276	804	13528	2.01179	0.308006	0.308006	0.350346
GOTERM_BP_FAT	GO:0043067~regulation of programmed cell death	33	9.62099	0.000248017	APH1B, CDH1, BCL2L1, ITM2B, MIF, GPX1, PEA15, PRUNE2, ALDH1A3, RAC1, TNFRSF19, NOS3, DLG5, THBS1, DHCR24, IRAK1, NACC1, PTPRF, ARHGEF9, TAX1BP1, DUSP1, BTG1, IGF2R, LYST, ENDOG, IFT57, RIPK2, MAPK8IP1, PERP, UNC13B, IGFBP3, IFI6, BARD1	276	812	13528	1.99197	0.356785	0.197993	0.419758
GOTERM_BP_FAT	GO:0010941~regulation of cell death	33	9.62099	0.000264219	APH1B, CDH1, BCL2L1, ITM2B, MIF, GPX1, PEA15, PRUNE2, ALDH1A3, RAC1, TNFRSF19, NOS3, DLG5, THBS1, DHCR24, IRAK1, NACC1, PTPRF, ARHGEF9, TAX1BP1, DUSP1, BTG1, IGF2R, LYST, ENDOG, IFT57, RIPK2, MAPK8IP1, PERP, UNC13B, IGFBP3, IFI6, BARD1	276	815	13528	1.98464	0.375065	0.145042	0.447121
GOTERM_BP_FAT	GO:0006334~nucleosome assembly	9	2.62391	0.000301882	H1F0, HIST2H2AB, HIST2H2AA3, HIST1H2BC, HIST1H2BD, HIST1H1C, HIST1H2BG, H2AFJ, HIST3H2BB, HIST1H4H	276	84	13528	5.25155	0.415576	0.125657	0.510702
GOTERM_BP_FAT	GO:0031497~chromatin assembly	9	2.62391	0.00038399	H1F0, HIST2H2AB, HIST2H2AA3, HIST1H2BC, HIST1H2BD, HIST1H1C, HIST1H2BG, H2AFJ, HIST3H2BB, HIST1H4H	276	87	13528	5.07046	0.495027	0.127725	0.649183
GOTERM_BP_FAT	GO:0065004~protein-DNA complex assembly	9	2.62391	0.000520851	H1F0, HIST2H2AB, HIST2H2AA3, HIST1H2BC, HIST1H2BD, HIST1H1C, HIST1H2BG, H2AFJ, HIST3H2BB, HIST1H4H	276	91	13528	4.84759	0.604195	0.143133	0.879602
GOTERM_BP_FAT	GO:0034728~nucleosome organization	9	2.62391	0.000602765	H1F0, HIST2H2AB, HIST2H2AA3, HIST1H2BC, HIST1H2BD, HIST1H1C, HIST1H2BG, H2AFJ, HIST3H2BB, HIST1H4H	276	93	13528	4.74334	0.657896	0.142072	1.01727
GOTERM_BP_FAT	GO:0016192~vesicle-mediated transport	25	7.28863	0.000702486	PACS1, EXOC7, FTH1, STX12, GBF1, PACSIN2, RAC1, VPS13A, THBS1, FTL, ZW10, OSBPL5, KIF1C, MARCH2, LYST, IGF2R, TRAPPC5, SPTBN2, MAPK8IP1, CLEC7A, TRAPPC1, STEAP2, UNC13B, LRP3, EPN1	276	576	13528	2.12737	0.713542	0.144672	1.18463
GOTERM_BP_FAT	GO:0048193~Golgi vesicle transport	10	2.91545	0.00141786	KIF1C, PACS1, OSBPL5, GBF1, VPS13A, TRAPPC1, STEAP2, FTH1, ZW10, FTL	276	131	13528	3.74156	0.919875	0.244566	2.37741
GOTERM_BP_FAT	GO:0006928~cell motion	21	6.12245	0.00170936	PTPRM, VIM, KITLG, MYH9, TPM4, ALCAM, CD9, SEMA6A, GPX1, BTG1, LYST, RAC1, ADRA2A, SEMA3C, NOS3, EFNA5, LAMC1, SPON2, BMPR1B, THBS1, TWIST1	276	475	13528	2.16696	0.952335	0.262401	2.85954
GOTERM_BP_FAT	GO:0006323~DNA packaging	9	2.62391	0.00265992	H1F0, HIST2H2AB, HIST2H2AA3, HIST1H2BC, HIST1H2BD, HIST1H1C, HIST1H2BG, H2AFJ, HIST3H2BB, HIST1H4H	276	117	13528	3.77035	0.991246	0.349981	4.41624
GOTERM_BP_FAT	GO:0006915~apoptosis	24	6.99708	0.00279115	FKBP8, APH1B, BCL2L1, ARHGEF9, KRT20, ITM2B, TAX1BP1, PRUNE2, PEA15, SEMA6A, GPX1, ZDHHC16, ENDOG, IFT57, RAC1, KRT8, TNFRSF19, RIPK2, THBS1, PERP, IFI6, PEG3, TWIST1, DHCR24	276	602	13528	1.95407	0.993074	0.339242	4.6293
GOTERM_BP_FAT	GO:0043065~positive regulation of apoptosis	19	5.53936	0.00307933	NACC1, PTPRF, APH1B, BCL2L1, ARHGEF9, ITM2B, GPX1, PRUNE2, DUSP1, ALDH1A3, ENDOG, LYST, RAC1, RIPK2, TNFRSF19, PERP, UNC13B, IGFBP3, BARD1	276	430	13528	2.16576	0.995858	0.344295	5.0956
GOTERM_BP_FAT	GO:0043068~positive regulation of programmed cell death	19	5.53936	0.00332518	NACC1, PTPRF, APH1B, BCL2L1, ARHGEF9, ITM2B, GPX1, PRUNE2, DUSP1, ALDH1A3, ENDOG, LYST, RAC1, RIPK2, TNFRSF19, PERP, UNC13B, IGFBP3, BARD1	276	433	13528	2.15075	0.997329	0.345079	5.49172
GOTERM_BP_FAT	GO:0012501~programmed cell death	24	6.99708	0.00333989	FKBP8, APH1B, BCL2L1, ARHGEF9, KRT20, ITM2B, TAX1BP1, PRUNE2, PEA15, SEMA6A, GPX1, ZDHHC16, ENDOG, IFT57, RAC1, KRT8, TNFRSF19, RIPK2, THBS1, PERP, IFI6, PEG3, TWIST1, DHCR24	276	611	13528	1.92528	0.997398	0.327514	5.51537
GOTERM_BP_FAT	GO:0010942~positive regulation of cell death	19	5.53936	0.00347846	NACC1, PTPRF, APH1B, BCL2L1, ARHGEF9, ITM2B, GPX1, PRUNE2, DUSP1, ALDH1A3, ENDOG, LYST, RAC1, RIPK2, TNFRSF19, PERP, UNC13B, IGFBP3, BARD1	276	435	13528	2.14086	0.997968	0.321204	5.73788
GOTERM_BP_FAT	GO:0006333~chromatin assembly or disassembly	9	2.62391	0.00439758	H1F0, HIST2H2AB, HIST2H2AA3, HIST1H2BC, HIST1H2BD, HIST1H1C, HIST1H2BG, H2AFJ, HIST3H2BB, HIST1H4H	276	127	13528	3.47347	0.999607	0.369479	7.20143
GOTERM_BP_FAT	GO:0016044~membrane organization	17	4.95627	0.0050669	BCL2L1, SYT7, FTH1, CD9, MARCH2, GBF1, PACSIN2, IGF2R, RAC1, TOMM22, CLEC7A, STEAP2, THBS1, LRP3, EPN1, DHCR24, FTL	276	381	13528	2.187	0.999881	0.394713	8.25373
GOTERM_BP_FAT	GO:0034097~response to cytokine stimulus	7	2.04082	0.00537611	IRAK1, AES, ENDOG, RIPK2, NOS3, BCL2L1, PLA2G5	276	79	13528	4.34306	0.999932	0.396332	8.73606
GOTERM_BP_FAT	GO:0008219~cell death	26	7.58017	0.00621565	FKBP8, APH1B, BCL2L1, KRT20, ITM2B, GPX1, PEA15, PRUNE2, RAC1, KRT8, TNFRSF19, THBS1, TWIST1, DHCR24, ARHGEF9, TAX1BP1, SEMA6A, ZDHHC16, ENDOG, IFT57, SPTBN2, RIPK2, CTSD, PERP, IFI6, PEG3	276	719	13528	1.77243	0.999985	0.425703	10.0337
GOTERM_BP_FAT	GO:0051051~negative regulation of transport	9	2.62391	0.00632983	PEA15, PFKL, PACSIN2, RAC1, G3BP2, NOS3, THBS1, CALM1, BARD1	276	135	13528	3.26763	0.999988	0.416045	10.2088
GOTERM_BP_FAT	GO:0006892~post-Golgi vesicle-mediated transport	6	1.74927	0.00637354	OSBPL5, GBF1, VPS13A, STEAP2, FTH1, FTL	276	58	13528	5.07046	0.999989	0.403715	10.2757
GOTERM_BP_FAT	GO:0016265~death	26	7.58017	0.00665319	FKBP8, APH1B, BCL2L1, KRT20, ITM2B, GPX1, PEA15, PRUNE2, RAC1, KRT8, TNFRSF19, THBS1, TWIST1, DHCR24, ARHGEF9, TAX1BP1, SEMA6A, ZDHHC16, ENDOG, IFT57, SPTBN2, RIPK2, CTSD, PERP, IFI6, PEG3	276	724	13528	1.76019	0.999993	0.403293	10.703
GOTERM_BP_FAT	GO:0008285~negative regulation of cell proliferation	16	4.66472	0.00710403	PTPRM, PTPRF, FGFRL1, S100A11, FTH1, CD9, BTG1, NKX3-1, NOS3, ADAMTS1, DLG5, LDOC1, THBS1, GPNMB, IGFBP3, DHCR24	276	361	13528	2.17239	0.999997	0.410491	11.3878
GOTERM_BP_FAT	GO:0022610~biological adhesion	25	7.28863	0.00867948	PTPRM, EPDR1, PTPRF, MYBPC1, FLOT2, KITLG, CDH1, MYH9, ALCAM, CD9, NCAM2, PODXL2, LPXN, LAMB2, ATP2C1, TMEM8A, RAC1, CLEC7A, DLG5, LAMC1, GPNMB, SPON2, BMPR1B, THBS1, PERP	276	701	13528	1.74802	1	0.462232	13.7422
GOTERM_BP_FAT	GO:0007155~cell adhesion	25	7.28863	0.00877772	PTPRM, EPDR1, PTPRF, MYBPC1, FLOT2, KITLG, CDH1, MYH9, ALCAM, CD9, NCAM2, PODXL2, LPXN, LAMB2, ATP2C1, TMEM8A, RAC1, CLEC7A, DLG5, LAMC1, GPNMB, SPON2, BMPR1B, THBS1, PERP	276	700	13528	1.75052	1	0.452969	13.8871
GOTERM_BP_FAT	GO:0065003~macromolecular complex assembly	24	6.99708	0.00917737	H1F0, HIST2H2AA3, IRAK1, HIST1H2BC, NACC1, HIST1H2BD, HIST1H1C, PFKL, HIST1H2BG, GPAA1, PFKP, CDH1, H2AFJ, MIF, HIST2H2AB, LPXN, MAZ, RAC1, TOMM22, LAMC1, HIST3H2BB, TUBA1A, UNC13B, ZW10, HIST1H4H	276	665	13528	1.76894	1	0.455277	14.4739
GOTERM_BP_FAT	GO:0006916~anti-apoptosis	11	3.207	0.00955395	IRAK1, GPX1, PEA15, RIPK2, NOS3, BCL2L1, MAPK8IP1, THBS1, IFI6, TAX1BP1, DHCR24	276	206	13528	2.61728	1	0.456614	15.0235
GOTERM_BP_FAT	GO:0051235~maintenance of location	6	1.74927	0.00961523	G3BP2, GPAA1, TMSB4X, TMSB10, FLNB, FTH1	276	64	13528	4.59511	1	0.447167	15.1126
GOTERM_BP_FAT	GO:0055114~oxidation reduction	23	6.70554	0.0111877	CYP2J2, ALDH3B2, VAT1, FTH1, DHRS7, KIAA0100, RDH12, PRUNE2, GPX1, KDM2A, HSDL2, ALDH1A3, KDM4B, FASN, IDH1, ALDH4A1, NOS3, DIO1, STEAP2, HPGD, STEAP1, FTL, DHCR24	276	639	13528	1.76421	1	0.486842	17.3695
GOTERM_BP_FAT	GO:0006690~icosanoid metabolic process	5	1.45773	0.0150232	CYP2J2, RNPEPL1, HPGD, PLA2G5, MIF	276	47	13528	5.21431	1	0.580494	22.6398
GOTERM_BP_FAT	GO:0045185~maintenance of protein location	5	1.45773	0.0161338	G3BP2, GPAA1, TMSB4X, TMSB10, FLNB	276	48	13528	5.10568	1	0.595155	24.1057
GOTERM_BP_FAT	GO:0042127~regulation of cell proliferation	26	7.58017	0.0180019	FGFRL1, KITLG, ROMO1, BCL2L1, FTH1, CD9, GPX1, OSR2, ADRA2A, NKX3-1, NOS3, DLG5, GPNMB, THBS1, DHCR24, NACC1, CAPNS1, PTPRM, PTPRF, S100A11, BTG1, RIPK2, ADAMTS1, LAMC1, LDOC1, IGFBP3	276	787	13528	1.61928	1	0.624428	26.5127
GOTERM_BP_FAT	GO:0043933~macromolecular complex subunit organization	24	6.99708	0.0184538	H1F0, HIST2H2AA3, IRAK1, HIST1H2BC, NACC1, HIST1H2BD, HIST1H1C, PFKL, HIST1H2BG, GPAA1, PFKP, CDH1, H2AFJ, MIF, HIST2H2AB, LPXN, MAZ, RAC1, TOMM22, LAMC1, HIST3H2BB, TUBA1A, UNC13B, ZW10, HIST1H4H	276	710	13528	1.65683	1	0.622652	27.0842
GOTERM_BP_FAT	GO:0030837~negative regulation of actin filament polymerization	4	1.16618	0.0187047	SPTBN2, TMSB4X, TMSB10, SPTAN1	276	28	13528	7.00207	1	0.617007	27.3996
GOTERM_BP_FAT	GO:0033559~unsaturated fatty acid metabolic process	5	1.45773	0.0197694	CYP2J2, RNPEPL1, HPGD, PLA2G5, MIF	276	51	13528	4.80534	1	0.627205	28.724
GOTERM_BP_FAT	GO:0031663~lipopolysaccharide-mediated signaling pathway	3	0.874636	0.0200639	IRAK1, RIPK2, NOS3	276	11	13528	13.3676	1	0.62262	29.0862
GOTERM_BP_FAT	GO:0080010~regulation of oxygen and reactive oxygen species metabolic process	3	0.874636	0.0200639	RAC1, ROMO1, THBS1	276	11	13528	13.3676	1	0.62262	29.0862
GOTERM_BP_FAT	GO:0032272~negative regulation of protein polymerization	4	1.16618	0.0205562	SPTBN2, TMSB4X, TMSB10, SPTAN1	276	29	13528	6.76062	1	0.621819	29.6879
GOTERM_BP_FAT	GO:0006826~iron ion transport	4	1.16618	0.0205562	STEAP2, STEAP1, FTH1, FTL	276	29	13528	6.76062	1	0.621819	29.6879
GOTERM_BP_FAT	GO:0007411~axon guidance	7	2.04082	0.0219218	ALCAM, SEMA6A, PTPRM, RAC1, EFNA5, SPON2, BMPR1B	276	107	13528	3.20656	1	0.63618	31.332
GOTERM_BP_FAT	GO:0030833~regulation of actin filament polymerization	5	1.45773	0.0238724	RAC1, SPTBN2, TMSB4X, TMSB10, SPTAN1	276	54	13528	4.53838	1	0.658568	33.6178
GOTERM_BP_FAT	GO:0051129~negative regulation of cellular component organization	8	2.33236	0.02598	PTPRF, PACSIN2, RAC1, SPTBN2, TMSB4X, TMSB10, THBS1, SPTAN1	276	142	13528	2.76138	1	0.680878	36.0069
GOTERM_BP_FAT	GO:0000904~cell morphogenesis involved in differentiation	11	3.207	0.0276927	ALCAM, NCAM2, SEMA6A, PTPRM, LAMB2, RAC1, EFNA5, LAMC1, MYH9, SPON2, BMPR1B	276	244	13528	2.20967	1	0.695636	37.8886
GOTERM_BP_FAT	GO:0030336~negative regulation of cell migration	5	1.45773	0.028455	PTPRM, RRAS, ABHD2, THBS1, IGFBP3	276	57	13528	4.29952	1	0.697089	38.7092
GOTERM_BP_FAT	GO:0034622~cellular macromolecular complex assembly	13	3.79009	0.0295736	H1F0, HIST2H2AB, HIST2H2AA3, HIST1H2BC, HIST1H2BD, HIST1H1C, HIST1H2BG, RAC1, TOMM22, H2AFJ, TUBA1A, HIST3H2BB, UNC13B, HIST1H4H	276	318	13528	2.00374	1	0.702919	39.8949
GOTERM_BP_FAT	GO:0034621~cellular macromolecular complex subunit organization	14	4.08163	0.0310459	H1F0, HIST2H2AA3, HIST1H2BC, HIST1H2BD, HIST1H1C, HIST1H2BG, H2AFJ, HIST2H2AB, MAZ, RAC1, TOMM22, TUBA1A, HIST3H2BB, UNC13B, HIST1H4H	276	357	13528	1.92214	1	0.712578	41.4228
GOTERM_BP_FAT	GO:0031333~negative regulation of protein complex assembly	4	1.16618	0.0312684	SPTBN2, TMSB4X, TMSB10, SPTAN1	276	34	13528	5.76641	1	0.707293	41.6505
GOTERM_BP_FAT	GO:0040013~negative regulation of locomotion	5	1.45773	0.0353255	PTPRM, RRAS, ABHD2, THBS1, IGFBP3	276	61	13528	4.01758	1	0.743671	45.6589
GOTERM_BP_FAT	GO:0008064~regulation of actin polymerization or depolymerization	5	1.45773	0.0353255	RAC1, SPTBN2, TMSB4X, TMSB10, SPTAN1	276	61	13528	4.01758	1	0.743671	45.6589
GOTERM_BP_FAT	GO:0031290~retinal ganglion cell axon guidance	3	0.874636	0.0363182	PTPRM, EFNA5, BMPR1B	276	15	13528	9.8029	1	0.746171	46.5995
GOTERM_BP_FAT	GO:0031175~neuron projection development	11	3.207	0.0368132	ALCAM, NCAM2, SEMA6A, PTPRM, LAMB2, RAC1, CDH1, EFNA5, GRIN3A, SPON2, BMPR1B	276	256	13528	2.10609	1	0.743793	47.0628
GOTERM_BP_FAT	GO:0046394~carboxylic acid biosynthetic process	8	2.33236	0.039067	SEPHS2, C1QTNF3, ELOVL5, AMACR, RNPEPL1, FASN, ALDH4A1, PLA2G5, MIF	276	155	13528	2.52978	1	0.757774	49.1245
GOTERM_BP_FAT	GO:0016053~organic acid biosynthetic process	8	2.33236	0.039067	SEPHS2, C1QTNF3, ELOVL5, AMACR, RNPEPL1, FASN, ALDH4A1, PLA2G5, MIF	276	155	13528	2.52978	1	0.757774	49.1245
GOTERM_BP_FAT	GO:0045765~regulation of angiogenesis	5	1.45773	0.0390901	PTPRM, BTG1, NOS3, THBS1, ANGPT2	276	63	13528	3.89004	1	0.751154	49.1453
GOTERM_BP_FAT	GO:0051271~negative regulation of cell motion	5	1.45773	0.0390901	PTPRM, RRAS, ABHD2, THBS1, IGFBP3	276	63	13528	3.89004	1	0.751154	49.1453
GOTERM_BP_FAT	GO:0030832~regulation of actin filament length	5	1.45773	0.0390901	RAC1, SPTBN2, TMSB4X, TMSB10, SPTAN1	276	63	13528	3.89004	1	0.751154	49.1453
GOTERM_BP_FAT	GO:0034134~toll-like receptor 2 signaling pathway	2	0.58309	0.0402447	IRAK1, RIPK2	276	2	13528	49.0145	1	0.754707	50.1716
GOTERM_BP_FAT	GO:0010670~positive regulation of oxygen and reactive oxygen species metabolic process	2	0.58309	0.0402447	ROMO1, THBS1	276	2	13528	49.0145	1	0.754707	50.1716
GOTERM_BP_FAT	GO:0008585~female gonad development	5	1.45773	0.0410551	IDH1, NOS3, ADAMTS1, BCL2L1, BMPR1B	276	64	13528	3.82926	1	0.755158	50.8803
GOTERM_BP_FAT	GO:0030036~actin cytoskeleton organization	10	2.91545	0.0416762	SHROOM1, ATP2C1, PACSIN2, RAC1, ADRA2A, TMSB4X, TMSB10, MYH9, RHOU, FLNB	276	226	13528	2.16878	1	0.754002	51.4171
GOTERM_BP_FAT	GO:0007409~axonogenesis	9	2.62391	0.0436317	ALCAM, NCAM2, SEMA6A, PTPRM, LAMB2, RAC1, EFNA5, SPON2, BMPR1B	276	193	13528	2.28565	1	0.763782	53.0711
GOTERM_BP_FAT	GO:0048608~reproductive structure development	7	2.04082	0.0436787	FOXA1, NKX3-1, IDH1, NOS3, ADAMTS1, BCL2L1, BMPR1B	276	126	13528	2.72303	1	0.757995	53.1103
GOTERM_BP_FAT	GO:0002221~pattern recognition receptor signaling pathway	3	0.874636	0.0458117	IRAK1, RIPK2, CLEC7A	276	17	13528	8.64962	1	0.768597	54.8525
GOTERM_BP_FAT	GO:0070555~response to interleukin-1	3	0.874636	0.0458117	IRAK1, AES, RIPK2	276	17	13528	8.64962	1	0.768597	54.8525
GOTERM_BP_FAT	GO:0002474~antigen processing and presentation of peptide antigen via MHC class I	3	0.874636	0.0458117	HLA-A, HLA-C, HLA-B, B2M	276	17	13528	8.64962	1	0.768597	54.8525
GOTERM_BP_FAT	GO:0007264~small GTPase mediated signal transduction	12	3.49854	0.0475162	RASEF, RAC1, ADRA2A, G3BP2, RAB1B, RRAS, RIT1, ARHGAP29, RAB7L1, RAB27B, RHOU, DHCR24	276	305	13528	1.92844	1	0.775347	56.2009
GOTERM_BP_FAT	GO:0032271~regulation of protein polymerization	5	1.45773	0.049466	RAC1, SPTBN2, TMSB4X, TMSB10, SPTAN1	276	68	13528	3.60401	1	0.783395	57.6968
GOTERM_BP_FAT	GO:0043154~negative regulation of caspase activity	3	0.874636	0.0508622	GPX1, IFI6, DHCR24	276	18	13528	8.16908	1	0.787278	58.7382
GOTERM_BP_FAT	GO:0006516~glycoprotein catabolic process	3	0.874636	0.0508622	EDEM3, MAN2B1, DHCR24	276	18	13528	8.16908	1	0.787278	58.7382
GOTERM_BP_FAT	GO:0046545~development of primary female sexual characteristics	5	1.45773	0.0517061	IDH1, NOS3, ADAMTS1, BCL2L1, BMPR1B	276	69	13528	3.55177	1	0.787399	59.356
GOTERM_BP_FAT	GO:0046660~female sex differentiation	5	1.45773	0.0517061	IDH1, NOS3, ADAMTS1, BCL2L1, BMPR1B	276	69	13528	3.55177	1	0.787399	59.356
GOTERM_BP_FAT	GO:0016477~cell migration	11	3.207	0.0558506	GPX1, BTG1, LYST, RAC1, KITLG, SEMA3C, NOS3, LAMC1, MYH9, THBS1, TWIST1	276	276	13528	1.95348	1	0.807766	62.2655
GOTERM_BP_FAT	GO:0002758~innate immune response-activating signal transduction	3	0.874636	0.0561017	IRAK1, RIPK2, CLEC7A	276	19	13528	7.73913	1	0.804145	62.4353
GOTERM_BP_FAT	GO:0002218~activation of innate immune response	3	0.874636	0.0561017	IRAK1, RIPK2, CLEC7A	276	19	13528	7.73913	1	0.804145	62.4353
GOTERM_BP_FAT	GO:0000041~transition metal ion transport	5	1.45773	0.0563501	ATP2C1, STEAP2, STEAP1, FTH1, FTL	276	71	13528	3.45172	1	0.800556	62.6026
GOTERM_BP_FAT	GO:0030029~actin filament-based process	10	2.91545	0.0581195	SHROOM1, ATP2C1, PACSIN2, RAC1, ADRA2A, TMSB4X, TMSB10, MYH9, RHOU, FLNB	276	241	13528	2.0338	1	0.805784	63.7741
GOTERM_BP_FAT	GO:0043066~negative regulation of apoptosis	13	3.79009	0.0583557	PEA15, IRAK1, GPX1, RIPK2, NOS3, BCL2L1, MAPK8IP1, THBS1, IFI6, TAX1BP1, MIF, BARD1, DHCR24	276	354	13528	1.79997	1	0.802243	63.9279
GOTERM_BP_FAT	GO:0000902~cell morphogenesis	13	3.79009	0.0600509	SHROOM1, PTPRM, MYH9, ALCAM, SEMA6A, NCAM2, LAMB2, RAC1, EFNA5, LAMC1, BMPR1B, SPON2, ZW10	276	356	13528	1.78986	1	0.806865	65.0134
GOTERM_BP_FAT	GO:0007010~cytoskeleton organization	15	4.37318	0.0620451	SHROOM1, TMSB10, KRT20, MYH9, RHOU, FLNB, SEMA6A, ATP2C1, PACSIN2, KRT8, RAC1, ADRA2A, TMSB4X, DYNC1H1, ZW10	276	436	13528	1.68628	1	0.812832	66.2511
GOTERM_BP_FAT	GO:0032989~cellular component morphogenesis	14	4.08163	0.0624943	SHROOM1, PTPRM, MYH9, ALCAM, CD9, SEMA6A, NCAM2, LAMB2, RAC1, EFNA5, LAMC1, BMPR1B, SPON2, ZW10	276	397	13528	1.72847	1	0.810585	66.5242
GOTERM_BP_FAT	GO:0007265~Ras protein signal transduction	6	1.74927	0.0628956	ADRA2A, G3BP2, RRAS, ARHGAP29, RHOU, DHCR24	276	105	13528	2.80083	1	0.808128	66.7663
GOTERM_BP_FAT	GO:0043069~negative regulation of programmed cell death	13	3.79009	0.062951	PEA15, IRAK1, GPX1, RIPK2, NOS3, BCL2L1, MAPK8IP1, THBS1, IFI6, TAX1BP1, MIF, BARD1, DHCR24	276	359	13528	1.7749	1	0.803905	66.7997
GOTERM_BP_FAT	GO:0048667~cell morphogenesis involved in neuron differentiation	9	2.62391	0.0638819	ALCAM, NCAM2, SEMA6A, PTPRM, LAMB2, RAC1, EFNA5, SPON2, BMPR1B	276	209	13528	2.11067	1	0.804283	67.3545
GOTERM_BP_FAT	GO:0060548~negative regulation of cell death	13	3.79009	0.064764	PEA15, IRAK1, GPX1, RIPK2, NOS3, BCL2L1, MAPK8IP1, THBS1, IFI6, TAX1BP1, MIF, BARD1, DHCR24	276	360	13528	1.76997	1	0.804407	67.8723
GOTERM_BP_FAT	GO:0001836~release of cytochrome c from mitochondria	3	0.874636	0.0671093	GPX1, BCL2L1, IFI6	276	21	13528	7.00207	1	0.811759	69.2116
GOTERM_BP_FAT	GO:0010466~negative regulation of peptidase activity	3	0.874636	0.0671093	GPX1, IFI6, DHCR24	276	21	13528	7.00207	1	0.811759	69.2116
GOTERM_BP_FAT	GO:0048812~neuron projection morphogenesis	9	2.62391	0.0696815	ALCAM, NCAM2, SEMA6A, PTPRM, LAMB2, RAC1, EFNA5, SPON2, BMPR1B	276	213	13528	2.07103	1	0.819722	70.6199
GOTERM_BP_FAT	GO:0043542~endothelial cell migration	3	0.874636	0.0728589	GPX1, NOS3, MYH9	276	22	13528	6.68379	1	0.829803	72.276
GOTERM_BP_FAT	GO:0051346~negative regulation of hydrolase activity	4	1.16618	0.0736638	GPX1, NOS3, IFI6, DHCR24	276	48	13528	4.08454	1	0.829303	72.6813
GOTERM_BP_FAT	GO:0051651~maintenance of location in cell	4	1.16618	0.0736638	G3BP2, GPAA1, FLNB, FTH1	276	48	13528	4.08454	1	0.829303	72.6813
GOTERM_BP_FAT	GO:0043281~regulation of caspase activity	5	1.45773	0.0770716	GPX1, IFT57, CDH1, IFI6, DHCR24	276	79	13528	3.10218	1	0.839468	74.3365
GOTERM_BP_FAT	GO:0006633~fatty acid biosynthetic process	5	1.45773	0.0770716	ELOVL5, RNPEPL1, FASN, PLA2G5, MIF	276	79	13528	3.10218	1	0.839468	74.3365
GOTERM_BP_FAT	GO:0043009~chordate embryonic development	12	3.49854	0.0774653	FKBP8, OSR2, ENDOG, PTPRR, NKX3-1, SPINT1, CDH1, KIAA1217, BCL2L1, MYH9, ZNF358, TWIST1	276	331	13528	1.77696	1	0.837278	74.5215
GOTERM_BP_FAT	GO:0009410~response to xenobiotic stimulus	3	0.874636	0.0787606	GPX1, UGT2B15, UGT2B28	276	23	13528	6.39319	1	0.838663	75.1214
GOTERM_BP_FAT	GO:0016525~negative regulation of angiogenesis	3	0.874636	0.0787606	PTPRM, THBS1, ANGPT2	276	23	13528	6.39319	1	0.838663	75.1214
GOTERM_BP_FAT	GO:0042832~defense response to protozoan	2	0.58309	0.0788753	LYST, CLEC7A	276	4	13528	24.5072	1	0.835439	75.1739
GOTERM_BP_FAT	GO:0009792~embryonic development ending in birth or egg hatching	12	3.49854	0.0795137	FKBP8, OSR2, ENDOG, PTPRR, NKX3-1, SPINT1, CDH1, KIAA1217, BCL2L1, MYH9, ZNF358, TWIST1	276	334	13528	1.761	1	0.834289	75.464
GOTERM_BP_FAT	GO:0044092~negative regulation of molecular function	12	3.49854	0.0795137	IRAK1, GPX1, AES, DUSP16, ADRA2A, MLLT1, NOS3, PKIB, MAPK8IP1, IFI6, CALM1, DHCR24	276	334	13528	1.761	1	0.834289	75.464
GOTERM_BP_FAT	GO:0006897~endocytosis	9	2.62391	0.0805855	MARCH2, PACSIN2, IGF2R, RAC1, CLEC7A, STEAP2, THBS1, LRP3, EPN1	276	220	13528	2.00514	1	0.834837	75.944
GOTERM_BP_FAT	GO:0010324~membrane invagination	9	2.62391	0.0805855	MARCH2, PACSIN2, IGF2R, RAC1, CLEC7A, STEAP2, THBS1, LRP3, EPN1	276	220	13528	2.00514	1	0.834837	75.944
GOTERM_BP_FAT	GO:0052548~regulation of endopeptidase activity	5	1.45773	0.0857014	GPX1, IFT57, CDH1, IFI6, DHCR24	276	82	13528	2.98869	1	0.850066	78.1159
GOTERM_BP_FAT	GO:0006325~chromatin organization	13	3.79009	0.0858673	H1F0, HIST2H2AB, HIST2H2AA3, HIST1H2BC, HIST1H2BD, HIST1H1C, KDM2A, HIST1H2BG, PRMT6, KDM4B, SETD7, H2AFJ, HIST3H2BB, HIST1H4H	276	378	13528	1.68568	1	0.847262	78.1832
GOTERM_BP_FAT	GO:0048666~neuron development	12	3.49854	0.0860732	ALCAM, NCAM2, SEMA6A, PTPRM, LAMB2, DYNLL2, RAC1, CDH1, EFNA5, GRIN3A, SPON2, BMPR1B	276	339	13528	1.73503	1	0.844614	78.2664
GOTERM_BP_FAT	GO:0006518~peptide metabolic process	4	1.16618	0.0928202	GPX1, THOP1, IDH1, GGT1	276	53	13528	3.69921	1	0.863572	80.8327
GOTERM_BP_FAT	GO:0051674~localization of cell	11	3.207	0.0968075	GPX1, BTG1, LYST, RAC1, KITLG, SEMA3C, NOS3, LAMC1, MYH9, THBS1, TWIST1	276	307	13528	1.75622	1	0.872339	82.2123
GOTERM_BP_FAT	GO:0048870~cell motility	11	3.207	0.0968075	GPX1, BTG1, LYST, RAC1, KITLG, SEMA3C, NOS3, LAMC1, MYH9, THBS1, TWIST1	276	307	13528	1.75622	1	0.872339	82.2123
GOTERM_BP_FAT	GO:0045766~positive regulation of angiogenesis	3	0.874636	0.0972941	BTG1, NOS3, THBS1	276	26	13528	5.65552	1	0.870752	82.3741
GOTERM_BP_FAT	GO:0001562~response to protozoan	2	0.58309	0.0976057	LYST, CLEC7A	276	5	13528	19.6058	1	0.868679	82.477
GOTERM_BP_FAT	GO:0045663~positive regulation of myoblast differentiation	2	0.58309	0.0976057	BTG1, IGFBP3	276	5	13528	19.6058	1	0.868679	82.477
GOTERM_BP_FAT	GO:0052547~regulation of peptidase activity	5	1.45773	0.0979038	GPX1, IFT57, CDH1, IFI6, DHCR24	276	86	13528	2.84968	1	0.866581	82.5749
GOTERM_BP_FAT	GO:0010033~response to organic substance	21	6.12245	0.098443	IRAK1, PFKL, EPHX1, CDH1, NEDD8, BCL2L1, EDEM3, GRIN3A, ASAH1, B2M, AES, DUSP1, BCHE, ENDOG, RIPK2, IDH1, NOS3, CLEC7A, STEAP2, THBS1, PLA2G5	276	721	13528	1.42761	1	0.865195	82.7507
GOTERM_BP_FAT	GO:0009617~response to bacterium	8	2.33236	0.0989813	IRAK1, GPX1, HIST1H2BC, DEFB132, LYST, HIST1H2BG, RIPK2, NOS3, B2M	276	193	13528	2.03169	1	0.863824	82.9245

## Sheet: up Hx MB468 GOs
Category	Term	Count	%	PValue	Genes	List Total	Pop Hits	Pop Total	Fold Enrichment	Bonferroni	Benjamini	FDR
GOTERM_BP_FAT	GO:0006414~translational elongation	11	5.26316	4.10292e-07	RPS3AP5, RPS28, RPL18A, RPL13A, RPL13, RPLP1, RPS12, RPL15P3, EEF2, RPS2, RPS8	166	101	13528	8.87558	0.000476646	0.000476646	0.000660647
GOTERM_BP_FAT	GO:0006412~translation	13	6.2201	0.000750604	RPS3AP5, RPS28, RPL18A, RPL13A, RPL13, PABPC4, RPLP1, RPL15P3, RPS12, EEF2, RPS2, AARS2, RPS8	166	331	13528	3.20067	0.582107	0.353553	1.20179
GOTERM_BP_FAT	GO:0034728~nucleosome organization	7	3.34928	0.000955152	H1F0, HIST1H2AC, HIST1H2BD, HIST1H2BK, H3F3A, H2AFJ, HMGA1	166	93	13528	6.13396	0.670578	0.309362	1.52694
GOTERM_BP_FAT	GO:0006334~nucleosome assembly	6	2.87081	0.00361239	H1F0, HIST1H2AC, HIST1H2BD, HIST1H2BK, H3F3A, H2AFJ	166	84	13528	5.821	0.985082	0.650516	5.66065
GOTERM_BP_FAT	GO:0031497~chromatin assembly	6	2.87081	0.00419943	H1F0, HIST1H2AC, HIST1H2BD, HIST1H2BK, H3F3A, H2AFJ	166	87	13528	5.62027	0.992479	0.623938	6.55165
GOTERM_BP_FAT	GO:0006333~chromatin assembly or disassembly	7	3.34928	0.00461885	H1F0, HIST1H2AC, HIST1H2BD, HIST1H2BK, H3F3A, H2AFJ, HMGA1	166	127	13528	4.49179	0.99539	0.592042	7.18341
GOTERM_BP_FAT	GO:0065004~protein-DNA complex assembly	6	2.87081	0.00508416	H1F0, HIST1H2AC, HIST1H2BD, HIST1H2BK, H3F3A, H2AFJ	166	91	13528	5.37323	0.997322	0.570925	7.87959
GOTERM_BP_FAT	GO:0051235~maintenance of location	5	2.39234	0.00768433	S100A7, G3BP2, GAA, GPAA1, OS9	166	64	13528	6.36672	0.999872	0.67387	11.6806
GOTERM_BP_FAT	GO:0006323~DNA packaging	6	2.87081	0.0142498	H1F0, HIST1H2AC, HIST1H2BD, HIST1H2BK, H3F3A, H2AFJ	166	117	13528	4.17918	1	0.843241	20.634
GOTERM_BP_FAT	GO:0065003~macromolecular complex assembly	16	7.6555	0.0159905	H1F0, HIST1H2AC, IRAK1, HIST1H2BD, PFKL, CRYAB, GPAA1, H2AFJ, HMGA1, MIF, MAZ, HIST1H2BK, H3F3A, QPRT, PILRB, ZW10	166	665	13528	1.96076	1	0.846356	22.8608
GOTERM_BP_FAT	GO:0051651~maintenance of location in cell	4	1.91388	0.0206396	G3BP2, GAA, GPAA1, OS9	166	48	13528	6.79116	1	0.889541	28.5245
GOTERM_BP_FAT	GO:0009084~glutamine family amino acid biosynthetic process	3	1.43541	0.0220697	PYCR1, GLUL, PRODH	166	19	13528	12.8675	1	0.884793	30.1867
GOTERM_BP_FAT	GO:0043933~macromolecular complex subunit organization	16	7.6555	0.0269377	H1F0, HIST1H2AC, IRAK1, HIST1H2BD, PFKL, CRYAB, GPAA1, H2AFJ, HMGA1, MIF, MAZ, HIST1H2BK, H3F3A, QPRT, PILRB, ZW10	166	710	13528	1.83648	1	0.912912	35.5769
GOTERM_BP_FAT	GO:0008202~steroid metabolic process	7	3.34928	0.0374335	SREBF1, OSBP2, CYP1B1, HSD17B2, TFCP2L1, INSIG1, PMVK	166	202	13528	2.82405	1	0.957854	45.8993
GOTERM_BP_FAT	GO:0010035~response to inorganic substance	7	3.34928	0.0397513	A2M, S100A16, S100A7, CRYAB, KRT14, CALM3, MT1X	166	205	13528	2.78272	1	0.956816	47.9592
GOTERM_BP_FAT	GO:0046394~carboxylic acid biosynthetic process	6	2.87081	0.0413622	PYCR1, GLUL, SCD, FASN, MIF, PRODH	166	155	13528	3.15461	1	0.953477	49.3473
GOTERM_BP_FAT	GO:0016053~organic acid biosynthetic process	6	2.87081	0.0413622	PYCR1, GLUL, SCD, FASN, MIF, PRODH	166	155	13528	3.15461	1	0.953477	49.3473
GOTERM_BP_FAT	GO:0007249~I-kappaB kinase/NF-kappaB cascade	4	1.91388	0.041559	IRAK1, TMED7, G3BP2, PRDX4	166	63	13528	5.17422	1	0.945054	49.5145
GOTERM_BP_FAT	GO:0008610~lipid biosynthetic process	9	4.30622	0.0444812	HSD17B2, TFCP2L1, SCD, FASN, GPAA1, PMVK, ALG12, PC, MIF	166	323	13528	2.27073	1	0.946993	51.9368
GOTERM_BP_FAT	GO:0006954~inflammatory response	9	4.30622	0.0458325	HDAC5, TMED7, NFKBIZ, A2M, NUPR1, S100A8, CLU, S100A9, MIF	166	325	13528	2.25676	1	0.943261	53.0196
GOTERM_BP_FAT	GO:0006979~response to oxidative stress	6	2.87081	0.0505435	PYCR1, S100A7, CRYAB, CLU, SEPP1, SCARA3	166	164	13528	2.98149	1	0.950875	56.6184
GOTERM_BP_FAT	GO:0034621~cellular macromolecular complex subunit organization	9	4.30622	0.0711768	H1F0, HIST1H2AC, HIST1H2BD, MAZ, HIST1H2BK, H3F3A, H2AFJ, HMGA1, PILRB	166	357	13528	2.05447	1	0.983188	69.5449
GOTERM_BP_FAT	GO:0006952~defense response	13	6.2201	0.0733153	HDAC5, TMED7, NFKBIZ, KCNN4, CRISP3, A2M, NUPR1, S100A8, HIST1H2BK, S100A7, CLU, S100A9, MIF	166	615	13528	1.72264	1	0.982077	70.6545
GOTERM_BP_FAT	GO:0008544~epidermis development	6	2.87081	0.0742808	BARX2, CASP14, S100A7, KRT15, KRT14, CALML5	166	184	13528	2.65741	1	0.979748	71.143
GOTERM_BP_FAT	GO:0008285~negative regulation of cell proliferation	9	4.30622	0.0748479	RERG, AZGP1, RARRES3, NUPR1, PTPRF, PTGES, CDKN2C, KRT4, CD164	166	361	13528	2.03171	1	0.976871	71.4263
GOTERM_BP_FAT	GO:0006621~protein retention in ER lumen	2	0.956938	0.0823347	GPAA1, OS9	166	7	13528	23.284	1	0.981568	74.9306
GOTERM_BP_FAT	GO:0045087~innate immune response	5	2.39234	0.0884882	TMED7, CRISP3, S100A7, CLU, MIF	166	138	13528	2.95268	1	0.984089	77.5045
GOTERM_BP_FAT	GO:0032507~maintenance of protein location in cell	3	1.43541	0.0890505	G3BP2, GPAA1, OS9	166	41	13528	5.96297	1	0.981938	77.727
GOTERM_BP_FAT	GO:0006325~chromatin organization	9	4.30622	0.0917115	H1F0, HDAC5, HIST1H2AC, HMGN2, HIST1H2BD, HIST1H2BK, H3F3A, H2AFJ, HMGA1	166	378	13528	1.94033	1	0.981538	78.7518
GOTERM_BP_FAT	GO:0007398~ectoderm development	6	2.87081	0.0961988	BARX2, CASP14, S100A7, KRT15, KRT14, CALML5	166	199	13528	2.4571	1	0.982627	80.3805
GOTERM_BP_FAT	GO:0006917~induction of apoptosis	8	3.82775	0.0970403	RPS3AP5, NUPR1, CASP14, CDKN2C, ARHGEF6, SORT1, PERP, PRODH	166	320	13528	2.03735	1	0.980818	80.6725
GOTERM_BP_FAT	GO:0006820~anion transport	5	2.39234	0.0976696	FXYD3, SLC4A11, SLC12A2, SLC1A6, ANO1	166	143	13528	2.84944	1	0.978771	80.8883
GOTERM_BP_FAT	GO:0012502~induction of programmed cell death	8	3.82775	0.0982415	RPS3AP5, NUPR1, CASP14, CDKN2C, ARHGEF6, SORT1, PERP, PRODH	166	321	13528	2.031	1	0.9766	81.0824

## Sheet: up Nx DLD GOs
Category	Term	Count	%	PValue	Genes	List Total	Pop Hits	Pop Total	Fold Enrichment	Bonferroni	Benjamini	FDR
GOTERM_BP_FAT	GO:0007067~mitosis	10	15.625	1.90386e-07	CCNB1, FAM83D, KIF2C, CDCA8, TUBB, CCNB2, TPX2, CDC20, AURKB, NCAPD2	55	220	13528	11.1802	0.00010661	0.00010661	0.000278529
GOTERM_BP_FAT	GO:0000280~nuclear division	10	15.625	1.90386e-07	CCNB1, FAM83D, KIF2C, CDCA8, TUBB, CCNB2, TPX2, CDC20, AURKB, NCAPD2	55	220	13528	11.1802	0.00010661	0.00010661	0.000278529
GOTERM_BP_FAT	GO:0007049~cell cycle	16	25	2.214e-07	TXNIP, TPX2, CDC20, AURKB, SESN2, NCAPD2, FAM83D, CCNB1, KIF2C, TUBB, CDCA8, CCNB2, MCM7, HJURP, UBC, PHGDH	55	776	13528	5.07142	0.000123976	6.19902e-05	0.000323902
GOTERM_BP_FAT	GO:0000087~M phase of mitotic cell cycle	10	15.625	2.21878e-07	CCNB1, FAM83D, KIF2C, CDCA8, TUBB, CCNB2, TPX2, CDC20, AURKB, NCAPD2	55	224	13528	10.9805	0.000124244	4.14164e-05	0.000324601
GOTERM_BP_FAT	GO:0048285~organelle fission	10	15.625	2.67547e-07	CCNB1, FAM83D, KIF2C, CDCA8, TUBB, CCNB2, TPX2, CDC20, AURKB, NCAPD2	55	229	13528	10.7408	0.000149815	3.74559e-05	0.000391414
GOTERM_BP_FAT	GO:0000278~mitotic cell cycle	11	17.1875	1.6983e-06	CCNB1, FAM83D, KIF2C, CDCA8, TUBB, CCNB2, UBC, TPX2, CDC20, AURKB, NCAPD2	55	370	13528	7.31243	0.000950599	0.000190192	0.00248455
GOTERM_BP_FAT	GO:0022402~cell cycle process	13	20.3125	1.72409e-06	TPX2, CDC20, AURKB, SESN2, NCAPD2, FAM83D, CCNB1, KIF2C, CDCA8, TUBB, CCNB2, PHGDH, UBC	55	565	13528	5.65934	0.000965027	0.000160903	0.00252228
GOTERM_BP_FAT	GO:0000279~M phase	10	15.625	5.41162e-06	CCNB1, FAM83D, KIF2C, CDCA8, TUBB, CCNB2, TPX2, CDC20, AURKB, NCAPD2	55	329	13528	7.4761	0.00302593	0.000432837	0.00791677
GOTERM_BP_FAT	GO:0022403~cell cycle phase	10	15.625	3.38355e-05	CCNB1, FAM83D, KIF2C, CDCA8, TUBB, CCNB2, TPX2, CDC20, AURKB, NCAPD2	55	414	13528	5.94115	0.0187698	0.00236572	0.0494891
GOTERM_BP_FAT	GO:0015804~neutral amino acid transport	4	6.25	7.59986e-05	SLC1A4, SLC1A5, SLC3A2, SLC7A5	55	21	13528	46.8502	0.0416678	0.00471782	0.111126
GOTERM_BP_FAT	GO:0006412~translation	8	12.5	0.000324907	RPL39P5, EEF1A1P5, RPLP1, AARS, UBC, GARS, RPS12, EEF2	55	331	13528	5.94474	0.16638	0.0180332	0.474279
GOTERM_BP_FAT	GO:0006414~translational elongation	5	7.8125	0.000695158	EEF1A1P5, RPLP1, UBC, RPS12, EEF2	55	101	13528	12.1764	0.322553	0.0347828	1.01219
GOTERM_BP_FAT	GO:0007018~microtubule-based movement	5	7.8125	0.00105824	KIF2C, TUBB, TUBA1B, TUBA1C, KIF20A	55	113	13528	10.8833	0.447293	0.0482097	1.53706
GOTERM_BP_FAT	GO:0051301~cell division	7	10.9375	0.00109551	CCNB1, FAM83D, CDCA8, CCNB2, CDC20, AURKB, NCAPD2	55	295	13528	5.83643	0.458722	0.0461197	1.59079
GOTERM_BP_FAT	GO:0006865~amino acid transport	4	6.25	0.005529	SLC1A4, SLC1A5, SLC3A2, SLC7A5	55	90	13528	10.9317	0.955168	0.198903	7.79098
GOTERM_BP_FAT	GO:0006323~DNA packaging	4	6.25	0.0113534	HMGB2, HJURP, TOP2A, NCAPD2	55	117	13528	8.40901	0.998329	0.347068	15.384
GOTERM_BP_FAT	GO:0015837~amine transport	4	6.25	0.0116171	SLC1A4, SLC1A5, SLC3A2, SLC7A5	55	118	13528	8.33775	0.998561	0.335672	15.7137
GOTERM_BP_FAT	GO:0006564~L-serine biosynthetic process	2	3.125	0.0119283	PHGDH, PSAT1	55	3	13528	163.976	0.998793	0.326518	16.1011
GOTERM_BP_FAT	GO:0034621~cellular macromolecular complex subunit organization	6	9.375	0.0136659	KIF2C, HMGB2, TUBB, HJURP, TUBA1B, TUBA1C	55	357	13528	4.13384	0.99955	0.34825	18.2339
GOTERM_BP_FAT	GO:0051258~protein polymerization	3	4.6875	0.0163149	TUBB, TUBA1B, TUBA1C	55	49	13528	15.059	0.9999	0.384196	21.3885
GOTERM_BP_FAT	GO:0008652~cellular amino acid biosynthetic process	3	4.6875	0.017599	PHGDH, ASNS, PSAT1	55	51	13528	14.4684	0.999952	0.391744	22.8764
GOTERM_BP_FAT	GO:0007017~microtubule-based process	5	7.8125	0.0181949	KIF2C, TUBB, TUBA1B, TUBA1C, KIF20A	55	253	13528	4.86094	0.999966	0.387169	23.5581
GOTERM_BP_FAT	GO:0046942~carboxylic acid transport	4	6.25	0.0208253	SLC1A4, SLC1A5, SLC3A2, SLC7A5	55	147	13528	6.69289	0.999992	0.414738	26.5001
GOTERM_BP_FAT	GO:0015849~organic acid transport	4	6.25	0.0211973	SLC1A4, SLC1A5, SLC3A2, SLC7A5	55	148	13528	6.64767	0.999994	0.406463	26.9075
GOTERM_BP_FAT	GO:0031145~anaphase-promoting complex-dependent proteasomal ubiquitin-dependent protein catabolic process	3	4.6875	0.0277124	CCNB1, UBC, CDC20	55	65	13528	11.3522	1	0.480948	33.7112
GOTERM_BP_FAT	GO:0051437~positive regulation of ubiquitin-protein ligase activity during mitotic cell cycle	3	4.6875	0.0301217	CCNB1, UBC, CDC20	55	68	13528	10.8513	1	0.495958	36.0741
GOTERM_BP_FAT	GO:0006563~L-serine metabolic process	2	3.125	0.0314992	PHGDH, PSAT1	55	8	13528	61.4909	1	0.498103	37.3896
GOTERM_BP_FAT	GO:0006266~DNA ligation	2	3.125	0.0314992	HMGB2, TOP2A	55	8	13528	61.4909	1	0.498103	37.3896
GOTERM_BP_FAT	GO:0051443~positive regulation of ubiquitin-protein ligase activity	3	4.6875	0.0317727	CCNB1, UBC, CDC20	55	70	13528	10.5413	1	0.488131	37.6478
GOTERM_BP_FAT	GO:0051439~regulation of ubiquitin-protein ligase activity during mitotic cell cycle	3	4.6875	0.0326114	CCNB1, UBC, CDC20	55	71	13528	10.3928	1	0.484749	38.4333
GOTERM_BP_FAT	GO:0051351~positive regulation of ligase activity	3	4.6875	0.0343149	CCNB1, UBC, CDC20	55	73	13528	10.1081	1	0.490471	40.0005
GOTERM_BP_FAT	GO:0034622~cellular macromolecular complex assembly	5	7.8125	0.0378034	HMGB2, TUBB, HJURP, TUBA1B, TUBA1C	55	318	13528	3.86735	1	0.512931	43.0946
GOTERM_BP_FAT	GO:0051438~regulation of ubiquitin-protein ligase activity	3	4.6875	0.0387214	CCNB1, UBC, CDC20	55	78	13528	9.46014	1	0.510018	43.8837
GOTERM_BP_FAT	GO:0006260~DNA replication	4	6.25	0.0401141	HMGB2, MCM7, TOP2A, TK1	55	190	13528	5.17818	1	0.511524	45.0614
GOTERM_BP_FAT	GO:0051340~regulation of ligase activity	3	4.6875	0.0414637	CCNB1, UBC, CDC20	55	81	13528	9.10976	1	0.512581	46.1807
GOTERM_BP_FAT	GO:0007059~chromosome segregation	3	4.6875	0.0414637	HJURP, TOP2A, NCAPD2	55	81	13528	9.10976	1	0.512581	46.1807
GOTERM_BP_FAT	GO:0009309~amine biosynthetic process	3	4.6875	0.0414637	PHGDH, ASNS, PSAT1	55	81	13528	9.10976	1	0.512581	46.1807
GOTERM_BP_FAT	GO:0009070~serine family amino acid biosynthetic process	2	3.125	0.0430586	PHGDH, PSAT1	55	11	13528	44.7207	1	0.515637	47.476
GOTERM_BP_FAT	GO:0031398~positive regulation of protein ubiquitination	3	4.6875	0.0442773	CCNB1, UBC, CDC20	55	84	13528	8.78442	1	0.515481	48.4462
GOTERM_BP_FAT	GO:0006268~DNA unwinding during replication	2	3.125	0.0544825	HMGB2, MCM7	55	14	13528	35.1377	1	0.581663	55.9393
GOTERM_BP_FAT	GO:0006835~dicarboxylic acid transport	2	3.125	0.0582607	SLC1A4, SLC1A5	55	15	13528	32.7952	1	0.596877	58.446
GOTERM_BP_FAT	GO:0031396~regulation of protein ubiquitination	3	4.6875	0.0604044	CCNB1, UBC, CDC20	55	100	13528	7.37891	1	0.600759	59.8086
GOTERM_BP_FAT	GO:0043933~macromolecular complex subunit organization	7	10.9375	0.0625098	KIF2C, HMGB2, TUBB, HJURP, QPRT, TUBA1B, TUBA1C	55	710	13528	2.42499	1	0.604204	61.1062
GOTERM_BP_FAT	GO:0010498~proteasomal protein catabolic process	3	4.6875	0.0625442	CCNB1, UBC, CDC20	55	102	13528	7.23422	1	0.595134	61.1271
GOTERM_BP_FAT	GO:0043161~proteasomal ubiquitin-dependent protein catabolic process	3	4.6875	0.0625442	CCNB1, UBC, CDC20	55	102	13528	7.23422	1	0.595134	61.1271
GOTERM_BP_FAT	GO:0043200~response to amino acid stimulus	2	3.125	0.0657726	AARS, ASNS	55	17	13528	28.9369	1	0.605156	63.0402
GOTERM_BP_FAT	GO:0051789~response to protein stimulus	3	4.6875	0.068005	EGR1, AARS, CYR61	55	107	13528	6.89618	1	0.608996	64.3115
GOTERM_BP_FAT	GO:0032508~DNA duplex unwinding	2	3.125	0.0695064	HMGB2, MCM7	55	18	13528	27.3293	1	0.608667	65.1434
GOTERM_BP_FAT	GO:0032392~DNA geometric change	2	3.125	0.0695064	HMGB2, MCM7	55	18	13528	27.3293	1	0.608667	65.1434
GOTERM_BP_FAT	GO:0006541~glutamine metabolic process	2	3.125	0.0732257	PHGDH, ASNS	55	19	13528	25.8909	1	0.6201	67.1271
GOTERM_BP_FAT	GO:0033554~cellular response to stress	6	9.375	0.0744295	HMGB2, ATF4, MCM7, AARS, ASNS, TOP2A	55	566	13528	2.60739	1	0.618069	67.7463
GOTERM_BP_FAT	GO:0015807~L-amino acid transport	2	3.125	0.0879572	SLC1A4, SLC7A5	55	23	13528	21.3881	1	0.673992	73.9964
GOTERM_BP_FAT	GO:0042364~water-soluble vitamin biosynthetic process	2	3.125	0.0879572	QPRT, PSAT1	55	23	13528	21.3881	1	0.673992	73.9964
GOTERM_BP_FAT	GO:0001101~response to acid	2	3.125	0.091604	AARS, ASNS	55	24	13528	20.497	1	0.681688	75.4768
GOTERM_BP_FAT	GO:0009066~aspartate family amino acid metabolic process	2	3.125	0.091604	PHGDH, ASNS	55	24	13528	20.497	1	0.681688	75.4768
GOTERM_BP_FAT	GO:0006094~gluconeogenesis	2	3.125	0.0952365	ATF4, PCK2	55	25	13528	19.6771	1	0.688893	76.873
GOTERM_BP_FAT	GO:0030261~chromosome condensation	2	3.125	0.0952365	TOP2A, NCAPD2	55	25	13528	19.6771	1	0.688893	76.873
GOTERM_BP_FAT	GO:0009069~serine family amino acid metabolic process	2	3.125	0.0988548	PHGDH, PSAT1	55	26	13528	18.9203	1	0.695653	78.1898
GOTERM_BP_FAT	GO:0042981~regulation of apoptosis	7	10.9375	0.099703	TXNIP, IER3, TUBB, AARS, UBC, ASNS, TOP2A	55	804	13528	2.14147	1	0.691595	78.4883

[truncated: 2 more sheets: up Nx LNCaP GOs, up Nx MB468 GOs]
